# Supplementary material for: Epigenetic scores for the circulating proteome as tools for disease prediction
Source: eLife journal article supplement (doi:10.7554/elife.71802), 2022-01-13
Supplement: supp1 [file elife-71802-supp1-v2.xlsx]

## Sheet: Description of tables
Description of Supplementary File 1
Information regarding each Supplementary Table															Part of the study	Corresponding Figure
1A. Demographic and array information for the cohorts and samples used in the study.															Population	N/A
1B. SomaScan panel performance in the STRADL test set (n=778) for 793 SOMAscan protein epitopes that were common to the STRADL test set and the KORA (n=944) training set.															EpiScore development	Figure 2
1C. Performance of Olink protein EpiScores when tested in the holdout LBC1936 sample (inflammatory n = 150, neurology n = 130) and the subsequent test sets in STRADL (n = 778) and LBC1921 (n=162).															EpiScore development	Figure 2
1D. Annotations for the 109 EpiScore proteins. 84 SOMAscan panel proteins and 25 Olink proteins with naming information.															EpiScore information	N/A
1E. Predictor weights for the 109 EpiScores from Olink and SomaScan panels which passed testing in independent cohorts.															EpiScore information	NA
1F. CpG feature counts for the 109 EpiScores selected for projection into Generation Scotland.															EpiScore information	N/A
1G. The frequency of CpG sites selected as contributing features to the 109 DNAm protein EpiScores which were selected from the holdout and test set analyses.															EpiScore information	N/A
1H. FUMA canonical pathway GeneSet enrichment results for the genes encoding the 109 proteins used to train protein EpiScores.															EpiScore information	N/A
1I. The results from the basic Cox mixed effects proportional hazards models showing 1306 EpiScore-trait relationships tested in Generation Scotland (maximum n=9,537) and the 294 associations (emboldened) which were significant with FDR P < 0.05.															Cox models	Figure 3
1J. The fully-adjusted Cox model associations that were present in the basic model in Generation Scotland (maximum n=9,537) with FDR P < 0.05 and remained significant with P < 0.05 in the fully-adjusted model (137 associations), with sensitivitiy analyses.															Cox models	Figures 3, 4, 5 and 6
1K. Schoenfeld residual analyses from the Cox proportional hazards (Coxph) sensitivity analysis.															Cox sensitivity	N/A
1L. Schoenfeld residuals for the eleven EpiScore-trait associations which indicated violations of the Cox proportional hazards assumption (EpiScore-specific Schoenfeld residual test P < 0.05) across each of the study period (up to 14 years follow-up).															Cox sensitivity	N/A
1M. SOMAScan EpiScore - incident diabetes associations reflect protein - diabetes associations across 4 cohorts with SOMAScan protein measurements.															Diabetes comparison	Figure 6
1N. Associations between estimated white blood cell (WBC) proportions and incident diseases which were significant with FDR P < 0.05 in the basic mixed effects Cox proportional hazards model and P < 0.05 in the fully adjusted model when WBCs were run as the predictors of incident disease.															WBC sensitivity	N/A
1O. Associations between GrimAge acceleration composite score and incident diseases in the basic mixed effects Cox proportional hazards model and the fully adjusted model when GrimAge acceleration score was run as the predictor of incident disease.															GrimAge sensitivity	N/A
1P. Associations between the levels of 109 robust EpiScores and subsequent COVID-19 hospitalisation and long-covid status (> 4 weeks duration) outcomes in Generation Scotland.															COVID	N/A
1Q-1B1. Primary and secondary care codes which were included (emboldened) and excluded for each of the 12 morbidities studied.															Data linkage	N/A

## Sheet: 1A
1A. Demographic and array information for the cohorts and samples used in the study.
	Generation Scotland Cox Model Cohort			Generation Scotland STRADL Subset			LBC1936 Wave 1			LBC1936 Wave 2			LBC1921 Wave 3			KORA
	N	Mean	SD	N	Mean	SD	N	Mean	SD	N	Mean	SD	N	Mean	SD	N	Mean	SD
Age (years)	9537	49.85	13.69	778	66.14	2.76	875	69.59	0.83	706	72.54	0.72	162	86.66	0.4	944	59.38	7.83
Sex	N	%		N	%		N	%		N	%		N	%		N	%
Male	3900	40.9		339	43.56		438	50.06		376	53.26		75	46.3		455	48.2
Female	5637	59.1		439	56.43		437	49.94		330	46.74		87	53.7		489	51.8
DNAm Array (EPIC/450K)	EPIC			EPIC			450K			450K			450K			450K
Proteomics Panel	NA			SomaLogic SomaScan v4			Olink Inflammatory			Olink Neurology			Olink Neurology			SomaLogic SomaScan v3.2
N Proteins Measured	NA			4235			92			92			92			1129

## Sheet: 1B
1B. SomaScan panel performance in the STRADL test set (n=778) for 793 SOMAscan protein epitopes that were common to the STRADL test set and the KORA (n=944) training set. Correlation (r) and p-values (p) are provided for the projected EpiScores in relation to measured protein levels. The results for the 480 EpiScores which generated predictive features are shown and ordered by performance, with t…																				x
SeqId	r	p	LC	UC	Target	UniProt	UniProt full name	Entrez Gene Name	Entrez Gene ID	Result
4407-10	0.73215	1.53167e-131	0.69777	0.763164	MSP	P26927	Hepatocyte growth factor-like protein	MST1	4485	pass
4435-66	0.626534	4.597e-86	0.581871	0.66743	ENPP7	Q6UWV6	Ectonucleotide pyrophosphatase/phosphodiesterase family member 7	ENPP7	339221	pass
4148-49	0.501203	1.0192e-50	0.446649	0.552043	PAPP-A	Q13219	Pappalysin-1	PAPPA	5069	pass
3617-80	0.493166	6.36894e-49	0.438063	0.544577	HGFA	Q04756	Hepatocyte growth factor activator	HGFAC	3083	pass
3440-7	0.452616	1.48173e-40	0.394891	0.506782	granzyme A	P12544	Granzyme A	GZMA	3001	pass
3403-1	0.409364	8.61379e-33	0.349121	0.466236	TPSB2	P20231	Tryptase beta-2	TPSB2	64499	pass
3291-30	0.402467	1.18065e-31	0.341849	0.459749	CD23	P06734	Low affinity immunoglobulin epsilon Fc receptor	FCER2	2208	pass
3195-50	0.377729	8.62883e-28	0.315827	0.43643	Granulysin	P22749	Granulysin	GNLY	10578	pass
5124-69	0.373835	3.27119e-27	0.311738	0.432752	sICAM-5	Q9UMF0	Intercellular adhesion molecule 5	ICAM5	7087	pass
3216-2	0.355151	1.52639e-24	0.292156	0.415077	PIGR	P01833	Polymeric immunoglobulin receptor	PIGR	5284	pass
5339-49	0.335305	6.75926e-22	0.271413	0.396254	calgranulin B	P06702	Protein S100-A9	S100A9	6280	pass
3175-51	0.322736	2.56482e-20	0.258308	0.384306	ATS13	Q76LX8	A disintegrin and metalloproteinase with thrombospondin motifs 13	ADAMTS13	11093	pass
3311-27	0.30503	3.24223e-18	0.239885	0.36744	FCG3B	O75015	Low affinity immunoglobulin gamma Fc region receptor III-B	FCGR3B	2215	pass
4500-50	0.302549	6.22533e-18	0.237307	0.365073	SCGF-alpha	Q9Y240	C-type lectin domain family 11 member A	CLEC11A	6320	pass
2948-58	0.302413	6.45032e-18	0.237166	0.364944	Growth hormone receptor	P10912	Growth hormone receptor	GHR	2690	pass
2950-57	0.29942	1.40464e-17	0.234058	0.362087	IGFBP-4	P22692	Insulin-like growth factor-binding protein 4	IGFBP4	3487	pass
2966-65	0.295629	3.71502e-17	0.230123	0.358468	SCGF-beta	Q9Y240	C-type lectin domain family 11 member A	CLEC11A	6320	pass
4337-49	0.289811	1.6072e-16	0.224088	0.35291	CRP	P02741	C-reactive protein	CRP	1401	pass
2579-17	0.289289	1.83011e-16	0.223546	0.352411	MMP-9	P14780	Matrix metalloproteinase-9	MMP9	4318	pass
4498-62	0.278592	2.46429e-15	0.212465	0.34218	NCAM-120	P13591	Neural cell adhesion molecule 1	NCAM1	4684	pass
3184-25	0.270582	1.60596e-14	0.204177	0.334508	Coagulation Factor VII	P08709	Coagulation factor VII	F7	2155	pass
3324-51	0.269889	1.88301e-14	0.203461	0.333844	LY9	Q9HBG7	T-lymphocyte surface antigen Ly-9	LY9	4063	pass
5034-79	0.269508	2.05475e-14	0.203067	0.333479	Trypsin 2	P07478	Trypsin-2	PRSS2	5645	pass
3343-1	0.255065	5.09256e-13	0.188151	0.319623	Aminoacylase-1	Q03154	Aminoacylase-1	ACY1	95	pass
5358-3	0.243506	5.77809e-12	0.176235	0.308514	OMD	Q99983	Osteomodulin	OMD	4958	pass
3046-31	0.239711	1.24887e-11	0.172327	0.304863	resistin	Q9HD89	Resistin	RETN	56729	pass
4568-17	0.237933	1.78402e-11	0.170496	0.303151	SLIK5	O94991	SLIT and NTRK-like protein 5	SLITRK5	26050	pass
3448-13	0.231033	6.92798e-11	0.163399	0.296506	IR	P06213	Insulin receptor	INSR	3643	pass
5028-59	0.222017	3.8253e-10	0.154135	0.287814	sCD163	Q86VB7	Scavenger receptor cysteine-rich type 1 protein M130	CD163	9332	pass
2658-27	0.204219	9.04429e-09	0.135882	0.270623	TrkC	Q16288	NT-3 growth factor receptor	NTRK3	4916	pass
3292-75	0.19029	8.88808e-08	0.121629	0.257139	CD48	P09326	CD48 antigen	CD48	962	pass
4929-55	0.188676	1.14598e-07	0.119979	0.255575	SHBG	P04278	Sex hormone-binding globulin	SHBG	6462	pass
4924-32	0.187872	1.29965e-07	0.119158	0.254795	MMP-1	P03956	Interstitial collagenase	MMP1	4312	pass
2580-83	0.184796	2.09245e-07	0.116015	0.251813	Myeloperoxidase	P05164	Myeloperoxidase	MPO	4353	pass
4831-4	0.184624	2.14827e-07	0.11584	0.251647	sL-Selectin	P14151	L-selectin	SELL	6402	pass
3152-57	0.184618	2.15036e-07	0.115833	0.25164	TNF sR-II	P20333	Tumor necrosis factor receptor superfamily member 1B	TNFRSF1B	7133	pass
2967-8	0.184065	2.34033e-07	0.115269	0.251104	VCAM-1	P19320	Vascular cell adhesion protein 1	VCAM1	7412	pass
5000-52	0.181596	3.4055e-07	0.112747	0.248709	LG3BP	Q08380	Galectin-3-binding protein	LGALS3BP	3959	pass
3038-9	0.176881	6.87249e-07	0.107935	0.244133	I-TAC	O14625	C-X-C motif chemokine 11	CXCL11	6373	pass
3169-70	0.176456	7.31402e-07	0.107502	0.243721	IDUA	P35475	Alpha-L-iduronidase	IDUA	3425	pass
3060-43	0.17505	8.98156e-07	0.106067	0.242356	C9	P02748	Complement component C9	C9	735	pass
2665-26	0.172969	1.21347e-06	0.103945	0.240335	BCMA	Q02223	Tumor necrosis factor receptor superfamily member 17	TNFRSF17	608	pass
2516-57	0.170124	1.82026e-06	0.101045	0.237571	6Ckine	O00585	C-C motif chemokine 21	CCL21	6366	pass
2780-35	0.165926	3.27193e-06	0.0967667	0.233491	Lactoferrin	P02788	Lactotransferrin	LTF	4057	pass
4763-31	0.163731	4.42063e-06	0.0945309	0.231356	Afamin	P43652	Afamin	AFM	173	pass
3485-28	0.163614	4.49174e-06	0.0944115	0.231242	b2-Microglobulin	P61769	Beta-2-microglobulin	B2M	567	pass
2771-35	0.159886	7.41757e-06	0.0906167	0.227616	IGFBP-1	P08833	Insulin-like growth factor-binding protein 1	IGFBP1	3484	pass
4481-34	0.156427	1.16972e-05	0.0870967	0.224249	C4	P0C0L4|P0C0L5	Complement C4-A|Complement C4-B	C4A|C4B	720|721	pass
3505-6	0.156247	1.19743e-05	0.0869137	0.224074	Lymphotoxin a1/b2	P01374|Q06643	Lymphotoxin-alpha|Lymphotoxin-beta	LTA|LTB	4049|4050	pass
3041-55	0.156021	1.23312e-05	0.086684	0.223854	MRC2	Q9UBG0	C-type mannose receptor 2	MRC2	9902	pass
3470-1	0.155353	1.34483e-05	0.0860038	0.223203	sE-Selectin	P16581	E-selectin	SELE	6401	pass
3554-24	0.154716	1.46017e-05	0.0853558	0.222583	Adiponectin	Q15848	Adiponectin	ADIPOQ	9370	pass
4990-87	0.154313	1.53782e-05	0.0849465	0.222191	GP1BA	P07359	Platelet glycoprotein Ib alpha chain	GP1BA	2811	pass
4920-10	0.152933	1.83508e-05	0.0835429	0.220847	Lysozyme	P61626	Lysozyme C	LYZ	4069	pass
2851-63	0.151376	2.23586e-05	0.0819597	0.21933	C5a	P01031	Complement C5	C5	727	pass
3293-2	0.150518	2.49064e-05	0.0810884	0.218495	CD5L	O43866	CD5 antigen-like	CD5L	922	pass
4496-60	0.1499	2.69123e-05	0.0804601	0.217892	MMP-12	P39900	Macrophage metalloelastase	MMP12	4321	pass
2687-2	0.149051	2.99206e-05	0.0795966	0.217064	MIA	Q16674	Melanoma-derived growth regulatory protein	MIA	8190	pass
3316-58	0.145829	4.4483e-05	0.0763237	0.213924	Heparin cofactor II	P05546	Heparin cofactor 2	SERPIND1	3053	pass
3473-78	0.14464	5.13868e-05	0.0751162	0.212765	Thrombopoietin Receptor	P40238	Thrombopoietin receptor	MPL	4352	pass
2982-82	0.134913	0.00016046	0.0652437	0.203273	Galectin-4	P56470	Galectin-4	LGALS4	3960	pass
3298-52	0.131381	0.000238223	0.0616621	0.199823	Contactin-4	Q8IWV2	Contactin-4	CNTN4	152330	pass
3044-3	0.131255	0.000241552	0.0615347	0.1997	PARC	P55774	C-C motif chemokine 18	CCL18	6362	pass
5107-7	0.131134	0.000244807	0.0614118	0.199582	Notch 1	P46531	Neurogenic locus notch homolog protein 1	NOTCH1	4851	pass
4153-11	0.130628	0.000258817	0.0608995	0.199088	alpha-1-antichymotrypsin complex	P01011	Alpha-1-antichymotrypsin	SERPINA3	12	pass
3805-16	0.129961	0.000278466	0.0602231	0.198436	Endocan	Q9NQ30	Endothelial cell-specific molecule 1	ESM1	11082	pass
3339-33	0.129132	0.000304803	0.0593835	0.197627	TSP2	P35442	Thrombospondin-2	THBS2	7058	pass
4160-49	0.129002	0.000309138	0.0592519	0.1975	MMP-2	P08253	72 kDa type IV collagenase	MMP2	4313	pass
3079-62	0.127218	0.000374842	0.0574433	0.195755	TIG2	Q99969	Retinoic acid receptor responder protein 2	RARRES2	5919	pass
3519-3	0.126527	0.000403592	0.0567437	0.19508	TARC	Q92583	C-C motif chemokine 17	CCL17	6361	pass
3035-80	0.12372	0.00054293	0.053901	0.192335	IL-19	Q9UHD0	Interleukin-19	IL19	29949	pass
5363-51	0.120201	0.000780761	0.0503386	0.188893	Semaphorin 3E	O15041	Semaphorin-3E	SEMA3E	9723	pass
3235-50	0.119149	0.00086878	0.0492734	0.187863	WFKN2	Q8TEU8	WAP, Kazal, immunoglobulin, Kunitz and NTR domain-containing protein 2	WFIKKN2	124857	pass
2705-5	0.117816	0.000993389	0.0479251	0.186559	TECK	O15444	C-C motif chemokine 25	CCL25	6370	pass
3600-2	0.116907	0.00108765	0.0470055	0.185669	Chitotriosidase-1	Q13231	Chitotriosidase-1	CHIT1	1118	pass
4141-79	0.116227	0.00116353	0.0463173	0.185003	IP-10	P02778	C-X-C motif chemokine 10	CXCL10	3627	pass
3348-49	0.1119	0.00177202	0.0419422	0.180766	BMP-1	P13497	Bone morphogenetic protein 1	BMP1	649	pass
3029-52	0.110551	0.00201457	0.0405785	0.179445	DC-SIGN	Q9NNX6	CD209 antigen	CD209	30835	pass
3508-78	0.109132	0.00230216	0.0391446	0.178054	MDC	O00626	C-C motif chemokine 22	CCL22	6367	pass
2816-50	0.105226	0.00329844	0.035198	0.174225	BCAM	P50895	Basal cell adhesion molecule	BCAM	4059	pass
2826-53	0.10492	0.00339089	0.0348895	0.173925	EDA	Q92838	Ectodysplasin-A	EDA	1896	pass
5491-12	0.102084	0.00436846	0.0320255	0.171143	Testican-2	Q92563	Testican-2	SPOCK2	9806	pass
5029-3	0.100645	0.00495597	0.0305735	0.169732	SEPR	Q12884	Prolyl endopeptidase FAP	FAP	2191	pass
4930-21	0.100492	0.00502263	0.0304187	0.169582	Stanniocalcin-1	P52823	Stanniocalcin-1	STC1	6781	pass
2436-49	0.098289	0.00607364	0.0281959	0.16742	CXCL16, soluble	Q9H2A7	C-X-C motif chemokine 16	CXCL16	58191	fail
2797-56	0.0953133	0.00780651	0.0251942	0.164499	Apo B	P04114	Apolipoprotein B-100	APOB	338	fail
5487-7	0.0952878	0.00782312	0.0251685	0.164474	SLAF7	Q9NQ25	SLAM family member 7	SLAMF7	57823	fail
4549-78	0.0952632	0.00783913	0.0251437	0.16445	FUT5	Q11128	Alpha-(1,3)-fucosyltransferase 5	FUT5	2527	fail
2475-1	0.0923299	0.00997515	0.0221859	0.161569	SCF sR	P10721	Mast/stem cell growth factor receptor Kit	KIT	3815	fail
4324-33	0.0903437	0.0117011	0.020184	0.159618	CYTT	P09228	Cystatin-SA	CST2	1470	fail
5264-65	0.0895926	0.0124198	0.019427	0.15888	calreticulin	P27797	Calreticulin	CALR	811	fail
3427-63	0.0892552	0.0127552	0.019087	0.158548	CSK21	P68400	Casein kinase II subunit alpha	CSNK2A1	1457	fail
3504-58	0.0892541	0.0127562	0.019086	0.158547	LEAP-1	P81172	Hepcidin	HAMP	57817	fail
2819-23	0.0889119	0.0131046	0.0187411	0.158211	Cadherin-5	P33151	Cadherin-5	CDH5	1003	fail
3803-10	0.0866622	0.0156103	0.0164747	0.156	CYTD	P28325	Cystatin-D	CST5	1473	fail
2974-61	0.0826633	0.021114	0.0124477	0.152068	contactin-1	Q12860	Contactin-1	CNTN1	1272	fail
4138-25	0.0819479	0.0222593	0.0117275	0.151364	IL-20	Q9NYY1	Interleukin-20	IL20	50604	fail
2602-2	0.0815535	0.0229133	0.0113306	0.150976	Angiopoietin-2	O15123	Angiopoietin-2	ANGPT2	285	fail
5105-2	0.0803315	0.025047	0.0101006	0.149774	Nogo Receptor	Q9BZR6	Reticulon-4 receptor	RTN4R	65078	fail
5088-175	0.0802859	0.0251298	0.0100547	0.149729	IL-23 R	Q5VWK5	Interleukin-23 receptor	IL23R	149233	fail
3419-49	0.079636	0.0263363	0.00940076	0.149089	CAMK2D	Q13557	Calcium/calmodulin-dependent protein kinase type II subunit delta	CAMK2D	817	fail
2977-7	0.0794247	0.0267391	0.00918814	0.148881	EDAR	Q9UNE0	Tumor necrosis factor receptor superfamily member EDAR	EDAR	10913	fail
4467-49	0.0793402	0.0269018	0.00910308	0.148798	SPARCL1	Q14515	SPARC-like protein 1	SPARCL1	8404	fail
3459-49	0.0769154	0.0319446	0.00666354	0.146412	PDGF Rb	P09619	Platelet-derived growth factor receptor beta	PDGFRB	5159	fail
2742-68	0.0767061	0.0324155	0.00645299	0.146206	Siglec-7	Q9Y286	Sialic acid-binding Ig-like lectin 7	SIGLEC7	27036	fail
4246-40	0.0766851	0.0324631	0.00643187	0.146185	NCAM-L1	P32004	Neural cell adhesion molecule L1	L1CAM	3897	fail
4775-34	0.076393	0.0331311	0.00613807	0.145897	Gelsolin	P06396	Gelsolin	GSN	2934	fail
3412-7	0.0760881	0.0338408	0.00583139	0.145597	Bcl-2	P10415	Apoptosis regulator Bcl-2	BCL2	596	fail
3312-64	0.0740712	0.0388701	0.00380314	0.143611	FCGR1	P12314	High affinity immunoglobulin gamma Fc receptor I	FCGR1A	2209	fail
5236-2	0.0734957	0.0404165	0.00322448	0.143045	NR1D1	P20393	Nuclear receptor subfamily 1 group D member 1	NR1D1	9572	fail
3457-57	0.0734796	0.0404605	0.00320831	0.143029	Periostin	Q15063	Periostin	POSTN	10631	fail
2677-1	0.073316	0.04091	0.00304378	0.142868	ERBB1	P00533	Epidermal growth factor receptor	EGFR	1956	fail
4811-33	0.0729139	0.0420324	0.00263954	0.142472	ITI heavy chain H4	Q14624	Inter-alpha-trypsin inhibitor heavy chain H4	ITIH4	3700	fail
2652-15	0.07291	0.0420434	0.00263564	0.142468	suPAR	Q03405	Urokinase plasminogen activator surface receptor	PLAUR	5329	fail
3000-66	0.07241	0.0434757	0.00213298	0.141975	MBL	P11226	Mannose-binding protein C	MBL2	4153	fail
2654-19	0.0719321	0.0448829	0.00165257	0.141505	TNF sR-I	P19438	Tumor necrosis factor receptor superfamily member 1A	TNFRSF1A	7132	fail
4482-66	0.0704715	0.0494234	0.000184567	0.140066	C5b, 6 Complex	P01031|P13671	Complement C5|Complement component C6	C5|C6	727|729	fail
4913-78	0.0701247	0.0505563	-0.00016399	0.139724	HCC-4	O15467	C-C motif chemokine 16	CCL16	6360	fail
3320-49	0.0694186	0.0529303	-0.000873599	0.139028	IGFBP-7	Q16270	Insulin-like growth factor-binding protein 7	IGFBP7	3490	fail
3728-52	0.0691782	0.053759	-0.00111507	0.138791	Secretin	P09683	Secretin	SCT	6343	fail
2999-6	0.0685974	0.055807	-0.00169869	0.138219	LSAMP	Q13449	Limbic system-associated membrane protein	LSAMP	4045	fail
4541-49	0.0683317	0.0567653	-0.00196567	0.137957	CDON	Q4KMG0	Cell adhesion molecule-related/down-regulated by oncogenes	CDON	50937	fail
2649-77	0.068184	0.0573035	-0.00211398	0.137811	sICAM-3	P32942	Intercellular adhesion molecule 3	ICAM3	3385	fail
2474-54	0.0675869	0.0595243	-0.00271391	0.137223	SAP	P02743	Serum amyloid P-component	APCS	325	fail
2708-54	0.0670992	0.0613903	-0.00320381	0.136742	TNFSF18	Q9UNG2	Tumor necrosis factor ligand superfamily member 18	TNFSF18	8995	fail
5100-53	0.0669218	0.062081	-0.00338201	0.136567	LIMP II	Q14108	Lysosome membrane protein 2	SCARB2	950	fail
3284-75	0.0668003	0.0625578	-0.00350406	0.136448	BGN	P21810	Biglycan	BGN	633	fail
2609-59	0.0656497	0.0672239	-0.00465971	0.135313	Cystatin C	P01034	Cystatin-C	CST3	1471	fail
5245-40	0.0654851	0.0679142	-0.00482502	0.135151	AMPK a2b2g1	P54646|O43741|P54619	5'-AMP-activated protein kinase subunit beta-2|5'-AMP-activated protein kinase catalytic subunit alpha-2|5'-AMP-activated protein kinase subunit gamma-1	PRKAA2|PRKAB2|PRKAG1	5563|5565|5571	fail
3461-58	0.0652171	0.0690506	-0.00509416	0.134887	PGCB	Q96GW7	Brevican core protein	BCAN	63827	fail
4543-65	0.0643368	0.0728936	-0.00597814	0.134019	CONA1	Q86Y22	Collagen alpha-1(XXIII) chain	COL23A1	91522	fail
3708-62	0.0641922	0.073541	-0.00612329	0.133876	a2-Macroglobulin	P01023	Alpha-2-macroglobulin	A2M	2	fail
4883-56	0.0632352	0.0779465	-0.00708413	0.132932	Insulin	P01308	Insulin	INS	3630	fail
5443-62	0.0631522	0.0783387	-0.0071675	0.13285	ANP	P01160	Natriuretic peptides A	NPPA	4878	fail
3220-40	0.0630555	0.0787972	-0.00726454	0.132755	RET	P07949	Proto-oncogene tyrosine-protein kinase receptor Ret	RET	5979	fail
2421-7	0.0620931	0.0834824	-0.00823067	0.131806	BDNF	P23560	Brain-derived neurotrophic factor	BDNF	627	fail
3054-3	0.0618846	0.084527	-0.00844004	0.1316	Haptoglobin, Mixed Type	P00738	Haptoglobin	HP	3240	fail
4413-3	0.0617244	0.0853364	-0.00860084	0.131442	SLPI	P03973	Antileukoproteinase	SLPI	6590	fail
5020-50	0.0614342	0.0868182	-0.00889207	0.131156	phosphoglycerate kinase 1	P00558	Phosphoglycerate kinase 1	PGK1	5230	fail
4194-26	0.0613246	0.0873833	-0.00900205	0.131048	AN32B	Q92688	Acidic leucine-rich nuclear phosphoprotein 32 family member B	ANP32B	10541	fail
4328-2	0.0604447	0.0920288	-0.00988523	0.130179	BOC	Q9BWV1	Brother of CDO	BOC	91653	fail
4874-3	0.0603403	0.0925924	-0.00998992	0.130077	Angiogenin	P03950	Angiogenin	ANG	283	fail
3352-80	0.0603084	0.0927654	-0.010022	0.130045	Carbonic anhydrase 6	P23280	Carbonic anhydrase 6	CA6	765	fail
3488-64	0.0596134	0.0965972	-0.0107194	0.129359	Catalase	P04040	Catalase	CAT	847	fail
4232-19	0.058963	0.100296	-0.011372	0.128717	IGF-I sR	P08069	Insulin-like growth factor 1 receptor	IGF1R	3480	fail
3894-15	0.0575482	0.108731	-0.0127914	0.127321	NAGK	Q9UJ70	N-acetyl-D-glucosamine kinase	NAGK	55577	fail
2632-5	0.0558917	0.11931	-0.014453	0.125686	IL-12 Rb1	P42701	Interleukin-12 receptor subunit beta-1	IL12RB1	3594	fail
2900-53	0.0555936	0.121295	-0.0147519	0.125392	HCC-1	Q16627	C-C motif chemokine 14	CCL14	6358	fail
5008-51	0.055538	0.121669	-0.0148076	0.125337	Mn SOD	P04179	Superoxide dismutase [Mn], mitochondrial	SOD2	6648	fail
5091-28	0.0554672	0.122145	-0.0148787	0.125267	ILT-4	Q8N423	Leukocyte immunoglobulin-like receptor subfamily B member 2	LILRB2	10288	fail
5066-134	0.0540427	0.132049	-0.0163071	0.12386	CLM6	Q08708	CMRF35-like molecule 6	CD300C	10871	fail
4493-92	0.0526327	0.142452	-0.0177208	0.122468	IL-11	P20809	Interleukin-11	IL11	3589	fail
5116-62	0.0519489	0.147717	-0.0184062	0.121792	ROBO2	Q9HCK4	Roundabout homolog 2	ROBO2	6092	fail
4842-62	0.0513483	0.152464	-0.0190082	0.121199	Glypican 3	P51654	Glypican-3	GPC3	2719	fail
4129-72	0.0512251	0.153452	-0.0191317	0.121077	Factor B	P00751	Complement factor B	CFB	629	fail
4544-4	0.0509901	0.15535	-0.0193672	0.120845	CTAP-III	P02775	Platelet basic protein	PPBP	5473	fail
4876-32	0.0508432	0.156545	-0.0195144	0.1207	Coagulation Factor IX	P00740	Coagulation factor IX	F9	2158	fail
4971-1	0.0508307	0.156647	-0.0195269	0.120687	CATZ	Q9UBR2	Cathepsin Z	CTSZ	1522	fail
4588-1	0.0503631	0.1605	-0.0199956	0.120225	PH	P01298	Pancreatic prohormone	PPY	5539	fail
2806-49	0.0501797	0.16203	-0.0201793	0.120044	Activin RIB	P36896	Activin receptor type-1B	ACVR1B	91	fail
3587-53	0.0500043	0.163505	-0.0203551	0.119871	BMP10	O95393	Bone morphogenetic protein 10	BMP10	27302	fail
3168-8	0.049998	0.163557	-0.0203614	0.119865	ADAMTS-5	Q9UNA0	A disintegrin and metalloproteinase with thrombospondin motifs 5	ADAMTS5	11096	fail
2692-74	0.0498735	0.16461	-0.0204862	0.119742	NPS-PLA2	P14555	Phospholipase A2, membrane associated	PLA2G2A	5320	fail
3890-8	0.0497493	0.165666	-0.0206107	0.119619	LDH-H 1	P07195	L-lactate dehydrogenase B chain	LDHB	3945	fail
2635-61	0.0488969	0.173044	-0.0214647	0.118777	Layilin	Q6UX15	Layilin	LAYN	143903	fail
3179-51	0.0486611	0.175128	-0.021701	0.118544	Cathepsin A	P10619	Lysosomal protective protein	CTSA	5476	fail
3449-58	0.0474665	0.185974	-0.0228978	0.117363	Kallistatin	P29622	Kallistatin	SERPINA4	5267	fail
2765-4	0.0465714	0.19442	-0.0237944	0.116478	GDF-11/8	O95390|O14793	Growth/differentiation factor 11|Growth/differentiation factor 8	GDF11|MSTN	NA	fail
3344-60	0.0458226	0.201698	-0.0245444	0.115738	Antithrombin III	P01008	Antithrombin-III	SERPINC1	462	fail
3874-8	0.0457725	0.202192	-0.0245945	0.115688	UB2L3	P68036	Ubiquitin-conjugating enzyme E2 L3	UBE2L3	7332	fail
2944-66	0.0457121	0.202788	-0.024655	0.115628	DAN	P41271	Neuroblastoma suppressor of tumorigenicity 1	NBL1	4681	fail
3365-7	0.0445869	0.214139	-0.0257818	0.114516	Dkk-4	Q9UBT3	Dickkopf-related protein 4	DKK4	27121	fail
5316-54	0.0444086	0.215979	-0.0259603	0.11434	Prothrombin	P00734	Prothrombin	F2	2147	fail
3847-56	0.0443939	0.216131	-0.0259751	0.114325	ETHE1	O95571	Persulfide dioxygenase ETHE1, mitochondrial	ETHE1	23474	fail
3845-51	0.0443427	0.216662	-0.0260263	0.114274	DLRB1	Q9NP97	Dynein light chain roadblock-type 1	DYNLRB1	83658	fail
3627-71	0.0443374	0.216716	-0.0260316	0.114269	MMEL2	Q495T6	Membrane metallo-endopeptidase-like 1	MMEL1	79258	fail
2913-1	0.0434983	0.225549	-0.0268718	0.113439	MPIF-1	P55773	C-C motif chemokine 23	CCL23	6368	fail
4440-15	0.0433054	0.227615	-0.0270649	0.113249	FCRL3	Q96P31	Fc receptor-like protein 3	FCRL3	115352	fail
3438-10	0.0429148	0.231839	-0.0274559	0.112862	FSTL3	O95633	Follistatin-related protein 3	FSTL3	10272	fail
4542-24	0.0423681	0.237845	-0.0280032	0.112322	Clusterin	P10909	Clusterin	CLU	1191	fail
4297-62	0.0421129	0.240687	-0.0282587	0.112069	Spondin-1	Q9HCB6	Spondin-1	SPON1	10418	fail
4487-1	0.0418751	0.243355	-0.0284967	0.111834	FGF7	P21781	Fibroblast growth factor 7	FGF7	2252	fail
4188-1	0.0413982	0.24877	-0.028974	0.111362	Aflatoxin B1 aldehyde reductase	O43488	Aflatoxin B1 aldehyde reductase member 2	AKR7A2	8574	fail
5359-65	0.0412534	0.25043	-0.0291189	0.111219	PIM1	P11309	Serine/threonine-protein kinase pim-1	PIM1	5292	fail
5114-65	0.0412466	0.250508	-0.0291257	0.111212	Prolactin Receptor	P16471	Prolactin receptor	PRLR	5618	fail
2834-54	0.0411999	0.251046	-0.0291725	0.111166	kallikrein 8	O60259	Kallikrein-8	KLK8	11202	fail
4911-49	0.0408396	0.255218	-0.0295331	0.110809	Glutathione S-transferase Pi	P09211	Glutathione S-transferase P	GSTP1	2950	fail
3073-51	0.0390896	0.276165	-0.0312843	0.109078	IL-18 BPa	O95998	Interleukin-18-binding protein	IL18BP	10068	fail
4880-21	0.0389649	0.277701	-0.031409	0.108954	GDF2	Q9UK05	Growth/differentiation factor 2	GDF2	2658	fail
3340-53	0.0387442	0.280434	-0.0316298	0.108736	TSP4	P35443	Thrombospondin-4	THBS4	7060	fail
4124-24	0.0381151	0.288323	-0.0322592	0.108113	HSP 70	P0DMV8	Heat shock 70 kDa protein 1A	HSPA1A	3303	fail
3581-53	0.0378184	0.292096	-0.0325561	0.10782	a2-HS-Glycoprotein	P02765	Alpha-2-HS-glycoprotein	AHSG	197	fail
3875-62	0.037655	0.294186	-0.0327194	0.107658	ARI3A	Q99856	AT-rich interactive domain-containing protein 3A	ARID3A	1820	fail
2614-28	0.037491	0.296296	-0.0328836	0.107496	Ephrin-A4	P52798	Ephrin-A4	EFNA4	1945	fail
4437-56	0.0371015	0.301345	-0.0332731	0.10711	ENTP5	O75356	Ectonucleoside triphosphate diphosphohydrolase 5	ENTPD5	957	fail
4152-58	0.0368693	0.304384	-0.0335054	0.10688	Prekallikrein	P03952	Plasma kallikrein	KLKB1	3818	fail
3397-7	0.036773	0.30565	-0.0336018	0.106785	SHP-2	Q06124	Tyrosine-protein phosphatase non-receptor type 11	PTPN11	5781	fail
4557-61	0.0364476	0.309952	-0.0339272	0.106463	KIRR3	Q8IZU9	Kin of IRRE-like protein 3	KIRREL3	84623	fail
5242-37	0.0363824	0.310819	-0.0339924	0.106398	MP2K4	P45985	Dual specificity mitogen-activated protein kinase kinase 4	MAP2K4	6416	fail
5468-67	0.0355521	0.321997	-0.0348228	0.105576	IL-17 RC	Q8NAC3	Interleukin-17 receptor C	IL17RC	84818	fail
5036-50	0.0351349	0.327713	-0.03524	0.105163	TSG-6	P98066	Tumor necrosis factor-inducible gene 6 protein	TNFAIP6	7130	fail
4396-54	0.0349598	0.33013	-0.0354151	0.10499	IFN-lambda 1	Q8IU54	Interferon lambda-1	IFNL1	282618	fail
2201-17	0.0346175	0.33489	-0.0357573	0.104651	Endostatin	P39060	Collagen alpha-1(XVIII) chain	COL18A1	80781	fail
2993-1	0.0344526	0.3372	-0.0359223	0.104487	IL-18 Rb	O95256	Interleukin-18 receptor accessory protein	IL18RAP	8807	fail
4254-6	0.0344357	0.337436	-0.0359392	0.104471	NUDC3	Q8IVD9	NudC domain-containing protein 3	NUDCD3	23386	fail
3331-8	0.0344281	0.337543	-0.0359468	0.104463	RGMB	Q6NW40	RGM domain family member B	RGMB	285704	fail
3322-52	0.0335805	0.349579	-0.0367943	0.103624	LRIG3	Q6UXM1	Leucine-rich repeats and immunoglobulin-like domains protein 3	LRIG3	121227	fail
4566-24	0.0328472	0.360207	-0.0375273	0.102898	RSPO2	Q6UXX9	R-spondin-2	RSPO2	340419	fail
2619-72	0.0325628	0.364384	-0.0378116	0.102616	GA733-1 protein	P09758	Tumor-associated calcium signal transducer 2	TACSTD2	4070	fail
2979-8	0.0324121	0.366609	-0.0379623	0.102467	ENA-78	P42830	C-X-C motif chemokine 5	CXCL5	6374	fail
3799-11	0.0321895	0.369911	-0.0381848	0.102246	Carbonic anhydrase III	P07451	Carbonic anhydrase 3	CA3	761	fail
4272-46	0.0319799	0.373038	-0.0383943	0.102038	PHI	P06744	Glucose-6-phosphate isomerase	GPI	2821	fail
4984-83	0.0318993	0.374244	-0.0384749	0.101959	Esterase D	P10768	S-formylglutathione hydrolase	ESD	2098	fail
2877-3	0.0315541	0.379438	-0.0388199	0.101617	UBC9	P63279	SUMO-conjugating enzyme UBC9	UBE2I	7329	fail
2837-3	0.0315113	0.380086	-0.0388627	0.101574	Met	P08581	Hepatocyte growth factor receptor	MET	4233	fail
3628-3	0.031187	0.385011	-0.0391868	0.101253	MP2K2	P36507	Dual specificity mitogen-activated protein kinase kinase 2	MAP2K2	5605	fail
4982-54	0.0310408	0.387244	-0.0393329	0.101108	Elafin	P19957	Elafin	PI3	5266	fail
3487-32	0.0308714	0.389841	-0.0395022	0.10094	BLC	O43927	C-X-C motif chemokine 13	CXCL13	10563	fail
2860-19	0.0306102	0.393867	-0.0397633	0.100681	Karyopherin-a2	P52292	Importin subunit alpha-1	KPNA2	3838	fail
2666-53	0.0299505	0.404144	-0.0404225	0.100028	Bone proteoglycan II	P07585	Decorin	DCN	1634	fail
3314-74	0.0298051	0.40643	-0.0405677	0.0998838	GFRa-1	P56159	GDNF family receptor alpha-1	GFRA1	2674	fail
3232-28	0.0296058	0.409578	-0.040767	0.0996862	TrATPase	P13686	Tartrate-resistant acid phosphatase type 5	ACP5	54	fail
5280-68	0.0295392	0.410632	-0.0408335	0.0996203	GHC2	Q9H1K4	Mitochondrial glutamate carrier 2	SLC25A18	83733	fail
5108-72	0.029475	0.41165	-0.0408976	0.0995567	Notch-3	Q9UM47	Neurogenic locus notch homolog protein 3	NOTCH3	4854	fail
2828-82	0.0291204	0.417301	-0.0412519	0.0992053	HAI-1	O43278	Kunitz-type protease inhibitor 1	SPINT1	6692	fail
3405-6	0.0275712	0.442521	-0.0427996	0.0976698	UFC1	Q9Y3C8	Ubiquitin-fold modifier-conjugating enzyme 1	UFC1	51506	fail
5265-12	0.0267921	0.455525	-0.0435778	0.0968975	GRB2-related adapter protein 2	O75791	GRB2-related adapter protein 2	GRAP2	9402	fail
4125-52	0.0265193	0.460129	-0.0438503	0.0966271	sRAGE	Q15109	Advanced glycosylation end product-specific receptor	AGER	177	fail
3351-1	0.0264722	0.460927	-0.0438974	0.0965804	CAMK2B	Q13554	Calcium/calmodulin-dependent protein kinase type II subunit beta	CAMK2B	816	fail
3506-49	0.0262763	0.464252	-0.044093	0.0963862	Lymphotoxin a2/b1	P01374|Q06643	Lymphotoxin-alpha|Lymphotoxin-beta	LTA|LTB	4049|4050	fail
2811-27	0.0262738	0.464295	-0.0440956	0.0963837	Angiopoietin-1	Q15389	Angiopoietin-1	ANGPT1	284	fail
3363-31	0.026123	0.466864	-0.0442462	0.0962342	CSK	P41240	Tyrosine-protein kinase CSK	CSK	1445	fail
2515-14	0.026119	0.466931	-0.0442501	0.0962302	GFRa-2	O00451	GDNF family receptor alpha-2	GFRA2	2675	fail
2975-19	0.0261161	0.466981	-0.044253	0.0962274	CTGF	P29279	Connective tissue growth factor	CTGF	1490	fail
3204-2	0.0254638	0.478184	-0.0449044	0.0955806	LKHA4	P09960	Leukotriene A-4 hydrolase	LTA4H	4048	fail
3191-50	0.0253804	0.479627	-0.0449877	0.0954979	WFKN1	Q96NZ8	WAP, Kazal, immunoglobulin, Kunitz and NTR domain-containing protein 1	WFIKKN1	117166	fail
4294-16	0.0248538	0.488793	-0.0455136	0.0949758	Sphingosine kinase 1	Q9NYA1	Sphingosine kinase 1	SPHK1	8877	fail
4163-5	0.0248476	0.4889	-0.0455198	0.0949697	Histone H2A.z	P0C0S5	Histone H2A.Z	H2AFZ	3015	fail
4996-66	0.0243132	0.498299	-0.0460534	0.0944397	HRG	P04196	Histidine-rich glycoprotein	HRG	3273	fail
3585-54	0.0243073	0.498403	-0.0460593	0.0944338	BASI	P35613	Basigin	BSG	682	fail
3299-29	0.0241643	0.500934	-0.046202	0.0942921	Contactin-5	O94779	Contactin-5	CNTN5	53942	fail
2778-10	0.023786	0.507662	-0.0465798	0.0939169	IL-22	Q9GZX6	Interleukin-22	IL22	50616	fail
5252-33	0.0235403	0.512059	-0.0468251	0.0936732	PDE11	Q9HCR9	Dual 3',5'-cyclic-AMP and -GMP phosphodiesterase 11A	PDE11A	50940	fail
4719-58	0.0234361	0.513928	-0.0469291	0.0935698	Protein disulfide isomerase A3	P30101	Protein disulfide-isomerase A3	PDIA3	2923	fail
5451-1	0.023371	0.515099	-0.0469941	0.0935053	ALCAM	Q13740	CD166 antigen	ALCAM	214	fail
3853-56	0.0232492	0.517292	-0.0471157	0.0933845	MDHC	P40925	Malate dehydrogenase, cytoplasmic	MDH1	4190	fail
5139-32	0.0231509	0.519065	-0.0472139	0.0932869	UNC5H3	O95185	Netrin receptor UNC5C	UNC5C	8633	fail
3043-49	0.0228485	0.524539	-0.0475157	0.0929871	ON	P09486	SPARC	SPARC	6678	fail
3714-49	0.022597	0.529116	-0.0477668	0.0927376	CK-MB	P12277|P06732	Creatine kinase B-type|Creatine kinase M-type	CKB|CKM	1152|1158	fail
2960-66	0.022337	0.533867	-0.0480263	0.0924797	Properdin	P27918	Properdin	CFP	5199	fail
5021-13	0.0218522	0.542784	-0.0485102	0.0919988	PPase	Q15181	Inorganic pyrophosphatase	PPA1	5464	fail
3431-54	0.0218253	0.543281	-0.0485371	0.0919721	EphA1	P21709	Ephrin type-A receptor 1	EPHA1	2041	fail
5109-24	0.0209313	0.559924	-0.0494293	0.0910852	Nr-CAM	Q92823	Neuronal cell adhesion molecule	NRCAM	4897	fail
5061-27	0.020429	0.569382	-0.0499306	0.0905868	B7-H2	O75144	ICOS ligand	ICOSLG	23308	fail
3647-49	0.0203262	0.571326	-0.0500331	0.0904848	TLR4:MD-2 complex	O00206|Q9Y6Y9	Lymphocyte antigen 96|Toll-like receptor 4	TLR4|LY96	7099|23643	fail
2773-50	0.020128	0.575086	-0.050231	0.0902882	IL-10	P22301	Interleukin-10	IL10	3586	fail
2696-87	0.0192892	0.591121	-0.0510679	0.0894558	Persephin	O60542	Persephin	PSPN	5623	fail
4962-52	0.0192296	0.592269	-0.0511274	0.0893966	ARMEL	Q49AH0	Cerebral dopamine neurotrophic factor	CDNF	441549	fail
3844-2	0.0190297	0.596123	-0.0513268	0.0891983	Cyclophilin A	P62937	Peptidyl-prolyl cis-trans isomerase A	PPIA	5478	fail
2706-69	0.0188437	0.59972	-0.0515124	0.0890137	Thyroxine-Binding Globulin	P05543	Thyroxine-binding globulin	SERPINA7	6906	fail
3045-72	0.0188279	0.600026	-0.0515282	0.088998	PTN	P21246	Pleiotrophin	PTN	5764	fail
4979-34	0.0187643	0.601258	-0.0515916	0.0889349	DERM	Q07507	Dermatopontin	DPT	1805	fail
3420-21	0.0178482	0.619138	-0.0525056	0.0880256	Carbonic anhydrase XIII	Q8N1Q1	Carbonic anhydrase 13	CA13	377677	fail
4964-67	0.0177207	0.621644	-0.0526327	0.0878991	ARTS1	Q9NZ08	Endoplasmic reticulum aminopeptidase 1	ERAP1	51752	fail
4314-12	0.0177192	0.621673	-0.0526342	0.0878976	XTP3A	Q9H773	dCTP pyrophosphatase 1	DCTPP1	79077	fail
3855-56	0.0168383	0.63911	-0.0535129	0.0870232	Peroxiredoxin-1	Q06830	Peroxiredoxin-1	PRDX1	5052	fail
3364-76	0.0167952	0.639968	-0.0535559	0.0869804	Cathepsin V	O60911	Cathepsin L2	CTSV	1515	fail
3466-8	0.0160629	0.654626	-0.0542863	0.0862534	PRKACA	P17612	cAMP-dependent protein kinase catalytic subunit alpha	PRKACA	5566	fail
4912-17	0.0156349	0.663255	-0.0547131	0.0858284	GOT1	P17174	Aspartate aminotransferase, cytoplasmic	GOT1	2805	fail
4212-5	0.015161	0.672861	-0.0551857	0.0853579	EP15R	Q9UBC2	Epidermal growth factor receptor substrate 15-like 1	EPS15L1	58513	fail
3607-71	0.014951	0.677136	-0.0553951	0.0851494	DKK3	Q9UBP4	Dickkopf-related protein 3	DKK3	27122	fail
4960-72	0.0148911	0.678357	-0.0554549	0.0850899	annexin I	P04083	Annexin A1	ANXA1	301	fail
4249-64	0.0139758	0.697118	-0.0563675	0.084181	NDP kinase B	P22392	Nucleoside diphosphate kinase B	NME2	4831	fail
4250-23	0.013665	0.703531	-0.0566773	0.0838724	NSF1C	Q9UNZ2	NSFL1 cofactor p47	NSFL1C	55968	fail
5015-15	0.0132805	0.711495	-0.0570607	0.0834904	PAFAH	Q13093	Platelet-activating factor acetylhydrolase	PLA2G7	7941	fail
4276-10	0.0131139	0.714956	-0.0572268	0.083325	prostatic binding protein	P30086	Phosphatidylethanolamine-binding protein 1	PEBP1	5037	fail
3452-17	0.012886	0.719699	-0.0574539	0.0830986	LCK	P06239	Tyrosine-protein kinase Lck	LCK	3932	fail
3484-60	0.0127823	0.72186	-0.0575573	0.0829956	Angiotensinogen	P01019	Angiotensinogen	AGT	183	fail
2615-60	0.012606	0.72554	-0.057733	0.0828205	Ephrin-A5	P52803	Ephrin-A5	EFNA5	1946	fail
2946-52	0.0125955	0.725761	-0.0577435	0.08281	Factor D	P00746	Complement factor D	CFD	1675	fail
2823-7	0.0122089	0.733854	-0.0581289	0.082426	COMMD7	Q86VX2	COMM domain-containing protein 7	COMMD7	149951	fail
5248-68	0.0111838	0.755455	-0.0591506	0.0814077	Cyclophilin F	P30405	Peptidyl-prolyl cis-trans isomerase F, mitochondrial	PPIF	10105	fail
2333-72	0.0110568	0.758147	-0.0592772	0.0812815	TGF-b1	P01137	Transforming growth factor beta-1 proprotein	TGFB1	7040	fail
2441-2	0.0108753	0.761994	-0.059458	0.0811012	FGF-10	O15520	Fibroblast growth factor 10	FGF10	2255	fail
5078-82	0.0107256	0.765174	-0.0596072	0.0809525	EphB6	O15197	Ephrin type-B receptor 6	EPHB6	2051	fail
5404-53	0.0106976	0.765768	-0.0596351	0.0809247	DR6	O75509	Tumor necrosis factor receptor superfamily member 21	TNFRSF21	27242	fail
4771-10	0.0106341	0.76712	-0.0596984	0.0808615	ASM3A	Q92484	Acid sphingomyelinase-like phosphodiesterase 3a	SMPDL3A	10924	fail
3605-77	0.0104582	0.770863	-0.0598737	0.0806868	MASP3	P48740	Mannan-binding lectin serine protease 1	MASP1	5648	fail
4145-58	0.00990726	0.782623	-0.0604227	0.0801393	Neurotrophin-3	P20783	Neurotrophin-3	NTF3	4908	fail
2617-56	0.0095094	0.791147	-0.0608191	0.079744	ERBB3	P21860	Receptor tyrosine-protein kinase erbB-3	ERBB3	2065	fail
2571-12	0.0093466	0.794642	-0.0609814	0.0795822	IGFBP-3	P17936	Insulin-like growth factor-binding protein 3	IGFBP3	3486	fail
4969-2	0.00893327	0.803533	-0.0613932	0.0791714	Carbonic anhydrase I	P00915	Carbonic anhydrase 1	CA1	759	fail
2524-56	0.00886823	0.804935	-0.061458	0.0791068	HMG-1	P09429	High mobility group protein B1	HMGB1	3146	fail
5076-53	0.0083611	0.815884	-0.0619632	0.0786028	EPHAA	Q5JZY3	Ephrin type-A receptor 10	EPHA10	284656	fail
5007-1	0.00796654	0.824427	-0.0623563	0.0782106	MAPK14	Q16539	Mitogen-activated protein kinase 14	MAPK14	1432	fail
2855-49	0.00768554	0.830525	-0.0626362	0.0779313	ERK-1	P27361	Mitogen-activated protein kinase 3	MAPK3	5595	fail
4430-44	0.0076676	0.830914	-0.0626541	0.0779135	Collectin Kidney 1	Q9BWP8	Collectin-11	COLEC11	78989	fail
2637-77	0.00695727	0.846374	-0.0633616	0.0772074	Macrophage mannose receptor	P22897	Macrophage mannose receptor 1	MRC1	4360	fail
3347-9	0.00687851	0.848092	-0.0634401	0.0771291	BARK1	P25098	Beta-adrenergic receptor kinase 1	ADRBK1	156	fail
3009-3	0.00676561	0.850556	-0.0635525	0.0770169	TGF-b R III	Q03167	Transforming growth factor beta receptor type 3	TGFBR3	7049	fail
4834-61	0.00663858	0.85333	-0.063679	0.0768906	Epithelial cell kinase	P29317	Ephrin type-A receptor 2	EPHA2	1969	fail
2700-56	0.00654559	0.855361	-0.0637716	0.0767982	Protein S	P07225	Vitamin K-dependent protein S	PROS1	5627	fail
2790-54	0.00638425	0.858889	-0.0639323	0.0766378	NAP-2	P02775	Platelet basic protein	PPBP	5473	fail
3290-50	0.00602726	0.866703	-0.0642879	0.0762828	CD109	Q6YHK3	CD109 antigen	CD109	135228	fail
3593-72	0.00575438	0.872685	-0.0645596	0.0760115	Caspase-3	P42574	Caspase-3	CASP3	836	fail
3616-3	0.00562227	0.875584	-0.0646912	0.0758802	GNS	P15586	N-acetylglucosamine-6-sulfatase	GNS	2799	fail
4230-1	0.00557221	0.876683	-0.064741	0.0758304	IF4G2	P78344	Eukaryotic translation initiation factor 4 gamma 2	EIF4G2	1982	fail
5228-25	0.00532622	0.882087	-0.064986	0.0755858	KIF23	Q02241	Kinesin-like protein KIF23	KIF23	9493	fail
2942-50	0.00515206	0.885915	-0.0651594	0.0754126	Cytochrome c	P99999	Cytochrome c	CYCS	54205	fail
2622-18	0.0049451	0.890469	-0.0653655	0.0752069	HO-2	P30519	Heme oxygenase 2	HMOX2	3163	fail
2644-11	0.00491604	0.891108	-0.0653944	0.075178	PKC-A	P17252	Protein kinase C alpha type	PRKCA	5578	fail
3032-11	0.00488054	0.89189	-0.0654298	0.0751427	FSH	P01215|P01225	Follitropin subunit beta|Glycoprotein hormones alpha chain	CGA|FSHB	1081|2488	fail
3069-52	0.00484302	0.892716	-0.0654672	0.0751053	IgM	P01871	Immunoglobulin heavy constant mu	IGHM|IGJ|IGK@|IGL@	3507|3512|50802|3535	fail
4258-15	0.00483828	0.89282	-0.0654719	0.0751006	PA2G4	Q9UQ80	Proliferation-associated protein 2G4	PA2G4	5036	fail
2625-53	0.0046882	0.896126	-0.0656213	0.0749514	HSP 90a/b	P07900|P08238	Heat shock protein HSP 90-alpha	HSP90AA1|HSP90AB1	NA	fail
4866-59	0.00465678	0.896818	-0.0656526	0.0749202	TrkB	Q16620	BDNF/NT-3 growth factors receptor	NTRK2	4915	fail
3234-23	0.00461147	0.897817	-0.0656977	0.0748751	URB	Q76M96	Coiled-coil domain-containing protein 80	CCDC80	151887	fail
4925-54	0.00448411	0.900624	-0.0658245	0.0747484	MMP-13	P45452	Collagenase 3	MMP13	4322	fail
3332-57	0.00413307	0.908368	-0.066174	0.0743993	RGM-C	Q6ZVN8	Hemojuvelin	HFE2	148738	fail
5459-33	0.00339162	0.924752	-0.0669122	0.073662	CYTN	P01037	Cystatin-SN	CST1	1469	fail
3825-18	0.00272408	0.939531	-0.0675767	0.072998	MK08	P45983	Mitogen-activated protein kinase 8	MAPK8	5599	fail
3421-54	0.00226838	0.949632	-0.0680304	0.0725447	CD30 Ligand	P32971	Tumor necrosis factor ligand superfamily member 8	TNFSF8	944	fail
3864-5	0.00208567	0.953684	-0.0682122	0.072363	RS7	P62081	40S ribosomal protein S7	RPS7	6201	fail
3212-30	0.00197329	0.956177	-0.0683241	0.0722512	ASAH2	Q9NR71	Neutral ceramidase	ASAH2	56624	fail
2952-75	0.00196733	0.956309	-0.06833	0.0722452	IGF-I	P05019	Insulin-like growth factor I	IGF1	3479	fail
2731-29	0.00158702	0.964749	-0.0687085	0.0718669	NADPH-P450 Oxidoreductase	P16435	NADPH--cytochrome P450 reductase	POR	5447	fail
3181-50	0.00149523	0.966787	-0.0687999	0.0717756	Cathepsin S	P25774	Cathepsin S	CTSS	1520	fail
3415-61	0.00145624	0.967652	-0.0688387	0.0717368	BSP	P21815	Bone sialoprotein 2	IBSP	3381	fail
5225-50	0.000234438	0.994791	-0.0700546	0.0705212	CK2-A1:B	P68400|P67870	Casein kinase II subunit beta|Casein kinase II subunit alpha	CSNK2A1|CSNK2B	1457|1460	fail
3026-5	-9.63588e-05	0.997859	-0.0703838	0.070192	Calpastatin	P20810	Calpastatin	CAST	831	fail
4318-12	-0.000508329	0.988706	-0.0707937	0.0697821	PTP-1C	P29350	Tyrosine-protein phosphatase non-receptor type 6	PTPN6	5777	fail
3469-74	-0.000900375	0.979996	-0.0711838	0.0693919	RPS6KA3	P51812	Ribosomal protein S6 kinase alpha-3	RPS6KA3	6197	fail
4342-10	-0.00155652	0.965426	-0.0718365	0.0687389	sICAM-1	P05362	Intercellular adhesion molecule 1	ICAM1	3383	fail
4976-57	-0.0015735	0.965049	-0.0718534	0.068722	CRK	P46108	Adapter molecule crk	CRK	1398	fail
3362-61	-0.00162343	0.963941	-0.0719031	0.0686723	CRDL1	Q9BU40	Chordin-like protein 1	CHRDL1	91851	fail
3836-51	-0.00194458	0.956814	-0.0722226	0.0683526	UFM1	P61960	Ubiquitin-fold modifier 1	UFM1	51569	fail
3296-92	-0.00197643	0.956107	-0.0722543	0.068321	CNTN2	Q02246	Contactin-2	CNTN2	6900	fail
2997-8	-0.00213257	0.952644	-0.0724096	0.0681655	JAM-B	P57087	Junctional adhesion molecule B	JAM2	58494	fail
4234-8	-0.00226026	0.949812	-0.0725366	0.0680384	IL-1 R4	Q01638	Interleukin-1 receptor-like 1	IL1RL1	9173	fail
3887-90	-0.00240963	0.9465	-0.0726852	0.0678898	IMB1	Q14974	Importin subunit beta-1	KPNB1	3837	fail
3401-8	-0.00280051	0.937838	-0.073074	0.0675007	TCPTP	P17706	Tyrosine-protein phosphatase non-receptor type 2	PTPN2	5771	fail
3194-36	-0.00306598	0.931959	-0.0733381	0.0672364	GPVI	Q9HCN6	Platelet glycoprotein VI	GP6	51206	fail
3620-67	-0.00325356	0.927807	-0.0735246	0.0670497	IL22RA1	Q8N6P7	Interleukin-22 receptor subunit alpha-1	IL22RA1	58985	fail
3521-16	-0.0032886	0.927031	-0.0735595	0.0670148	TSH	P01215|P01222	Glycoprotein hormones alpha chain|Thyrotropin subunit beta	CGA|TSHB	1081|12372	fail
3898-5	-0.00343451	0.923803	-0.0737046	0.0668695	PSD7	P51665	26S proteasome non-ATPase regulatory subunit 7	PSMD7	5713	fail
4547-59	-0.00346303	0.923173	-0.073733	0.0668411	FLRT1	Q9NZU1	Leucine-rich repeat transmembrane protein FLRT1	FLRT1	23769	fail
2911-27	-0.00501343	0.888965	-0.0752748	0.0652975	Midkine	P21741	Midkine	MDK	4192	fail
5030-52	-0.0055948	0.876187	-0.0758529	0.0647185	SIRT2	Q8IXJ6	NAD-dependent protein deacetylase sirtuin-2	SIRT2	22933	fail
5087-5	-0.00564585	0.875067	-0.0759036	0.0646677	IL-22BP	Q969J5	Interleukin-22 receptor subunit alpha-2	IL22RA2	116379	fail
3896-5	-0.00647768	0.856846	-0.0767306	0.0638393	Phosphoglycerate mutase 1	P18669	Phosphoglycerate mutase 1	PGAM1	5223	fail
3710-49	-0.0065282	0.855741	-0.0767809	0.063789	Angiostatin	P00747	Plasminogen	PLG	5340	fail
3049-61	-0.00654134	0.855454	-0.0767939	0.0637759	Trypsin	P07477	Trypsin-1	PRSS1	5644	fail
3042-7	-0.00674274	0.851055	-0.0769941	0.0635753	Myoglobin	P02144	Myoglobin	MB	4151	fail
3651-50	-0.00677238	0.850408	-0.0770236	0.0635458	VEGF sR2	P35968	Vascular endothelial growth factor receptor 2	KDR	3791	fail
4534-10	-0.00677961	0.85025	-0.0770308	0.0635386	BSSP4	Q9GZN4	Brain-specific serine protease 4	PRSS22	64063	fail
2961-1	-0.00738892	0.836972	-0.0776365	0.0629317	Protein C	P04070	Vitamin K-dependent protein C	PROC	5624	fail
5069-9	-0.00782666	0.827461	-0.0780716	0.0624956	DAF	P08174	Complement decay-accelerating factor	CD55	1604	fail
3480-7	-0.00811791	0.821147	-0.0783611	0.0622055	DUS3	P51452	Dual specificity protein phosphatase 3	DUSP3	1845	fail
2953-31	-0.00816348	0.82016	-0.0784064	0.0621601	Luteinizing hormone	P01215|P01229	Glycoprotein hormones alpha chain|Lutropin subunit beta	CGA|LHB	1081|3972	fail
4306-4	-0.00838292	0.815412	-0.0786245	0.0619415	Transketolase	P29401	Transketolase	TKT	7086	fail
5352-11	-0.00842906	0.814414	-0.0786703	0.0618955	HVEM	Q92956	Tumor necrosis factor receptor superfamily member 14	TNFRSF14	8764	fail
3640-14	-0.00875499	0.807377	-0.0789943	0.0615708	RAP	P30533	Alpha-2-macroglobulin receptor-associated protein	LRPAP1	4043	fail
2805-6	-0.00877076	0.807036	-0.0790099	0.0615551	ACE2	Q9BYF1	Angiotensin-converting enzyme 2	ACE2	59272	fail
4967-1	-0.00919225	0.797959	-0.0794288	0.0611351	C1QBP	Q07021	Complement component 1 Q subcomponent-binding protein, mitochondrial	C1QBP	708	fail
3495-15	-0.00927047	0.796277	-0.0795066	0.0610572	GCP-2	P80162	C-X-C motif chemokine 6	CXCL6	6372	fail
4908-6	-0.0098088	0.78473	-0.0800415	0.0605208	Endoglin	P17813	Endoglin	ENG	2022	fail
3413-50	-0.00998832	0.78089	-0.0802199	0.0603419	BFL1	Q16548	Bcl-2-related protein A1	BCL2A1	597	fail
4162-54	-0.0105495	0.768919	-0.0807775	0.0597827	Transferrin	P02787	Serotransferrin	TF	7018	fail
3817-18	-0.0105575	0.768749	-0.0807854	0.0597748	KPCT	Q04759	Protein kinase C theta type	PRKCQ	5588	fail
4179-57	-0.0105891	0.768076	-0.0808169	0.0597432	2003-03-14	P31946|P62258|P61981|Q04917|P27348|P63104|P31947	14-3-3 protein gamma	YWHAB|YWHAE|YWHAG|YWHAH|YWHAQ|YWHAZ|SFN	7529|7531|7532|7533|10971|7534|2810	fail
4156-74	-0.010763	0.764379	-0.0809896	0.0595699	TGF-b2	P61812	Transforming growth factor beta-2 proprotein	TGFB2	7042	fail
2870-29	-0.0117586	0.743318	-0.0819787	0.0585777	RAC1	P63000	Ras-related C3 botulinum toxin substrate 1	RAC1	5879	fail
3798-71	-0.0119453	0.73939	-0.0821642	0.0583916	Carbonic anhydrase 9	Q16790	Carbonic anhydrase 9	CA9	768	fail
2190-55	-0.0121993	0.734055	-0.0824165	0.0581385	Coagulation Factor XI	P03951	Coagulation factor XI	F11	2160	fail
4807-13	-0.0124805	0.728165	-0.0826958	0.0578582	CO8A1	P27658	Collagen alpha-1(VIII) chain	COL8A1	1295	fail
3072-4	-0.0126709	0.724185	-0.082885	0.0576684	IL-13	P35225	Interleukin-13	IL13	3596	fail
4393-3	-0.0129703	0.717942	-0.0831824	0.0573699	FGF-16	O43320	Fibroblast growth factor 16	FGF16	8823	fail
3317-33	-0.0131623	0.71395	-0.083373	0.0571785	HTRA2	O43464	Serine protease HTRA2, mitochondrial	HTRA2	27429	fail
2578-67	-0.0133711	0.709615	-0.0835805	0.0569703	MCP-1	P13500	C-C motif chemokine 2	CCL2	6347	fail
5070-76	-0.0135994	0.704889	-0.0838071	0.0567428	DcR3	O95407	Tumor necrosis factor receptor superfamily member 6B	TNFRSF6B	8771	fail
5256-86	-0.0140411	0.695773	-0.0842458	0.0563024	PDE5A	O76074	cGMP-specific 3',5'-cyclic phosphodiesterase	PDE5A	8654	fail
2647-66	-0.0142306	0.691876	-0.084434	0.0561134	Rab GDP dissociation inhibitor beta	P50395	Rab GDP dissociation inhibitor beta	GDI2	2665	fail
3151-6	-0.0143551	0.689319	-0.0845577	0.0559892	IL-2 sRa	P01589	Interleukin-2 receptor subunit alpha	IL2RA	3559	fail
3024-18	-0.0147405	0.68143	-0.0849404	0.055605	a2-Antiplasmin	P08697	Alpha-2-antiplasmin	SERPINF2	5345	fail
4203-50	-0.0147781	0.680661	-0.0849778	0.0555675	Cofilin-1	P23528	Cofilin-1	CFL1	1072	fail
3867-49	-0.0150973	0.674155	-0.0852947	0.0552492	SE6L2	Q6UXD5	Seizure 6-like protein 2	SEZ6L2	26470	fail
5227-60	-0.0152462	0.671129	-0.0854426	0.0551007	PDK1	Q15118	[Pyruvate dehydrogenase (acetyl-transferring)] kinase isozyme 1, mitochondrial	PDK1	5163	fail
4127-75	-0.015309	0.669855	-0.0855049	0.0550381	C6	P13671	Complement component C6	C6	729	fail
2789-26	-0.0155946	0.664068	-0.0857885	0.0547533	MMP-7	P09237	Matrilysin	MMP7	4316	fail
3903-49	-0.0171504	0.632909	-0.087333	0.0532016	Sorting nexin 4	O95219	Sorting nexin-4	SNX4	8723	fail
3192-3	-0.0173361	0.629232	-0.0875174	0.0530164	Glutamate carboxypeptidase	Q96KP4	Cytosolic non-specific dipeptidase	CNDP2	55748	fail
4903-72	-0.0174749	0.626488	-0.0876551	0.0528779	Calcineurin	Q08209|P63098	Calcineurin subunit B type 1|Serine/threonine-protein phosphatase 2B catalytic subunit alpha isoform	PPP3CA|PPP3R1	5530|5534	fail
2774-10	-0.0176899	0.62225	-0.0878685	0.0526635	IL-16	Q14005	Pro-interleukin-16	IL16	3603	fail
5128-53	-0.0179471	0.617197	-0.0881238	0.0524069	SLAF6	Q96DU3	SLAM family member 6	SLAMF6	114836	fail
5033-27	-0.0182042	0.612163	-0.088379	0.0521505	Tropomyosin 1 alpha chain	P09493	Tropomyosin alpha-1 chain	TPM1	7168	fail
3797-1	-0.0184021	0.608299	-0.0885755	0.0519529	Cadherin-2	P19022	Cadherin-2	CDH2	1000	fail
2634-2	-0.018576	0.604914	-0.0887481	0.0517795	IL-2 sRg	P31785	Cytokine receptor common subunit gamma	IL2RG	3561	fail
5494-52	-0.0187732	0.601086	-0.0889438	0.0515827	RUXF	P62306	Small nuclear ribonucleoprotein F	SNRPF	6636	fail
4559-64	-0.0196499	0.584201	-0.0898137	0.050708	KYNU	Q16719	Kynureninase	KYNU	8942	fail
3622-33	-0.0198551	0.58028	-0.0900174	0.0505033	LGMN	Q99538	Legumain	LGMN	5641	fail
5111-15	-0.0198598	0.58019	-0.0900221	0.0504985	NRX3B	Q9HDB5	Neurexin-3-beta	NRXN3	9369	fail
3535-84	-0.0201174	0.575288	-0.0902776	0.0502416	DKK1	O94907	Dickkopf-related protein 1	DKK1	22943	fail
3210-1	-0.0202412	0.572937	-0.0904005	0.050118	METAP1	P53582	Methionine aminopeptidase 1	METAP1	23173	fail
5364-7	-0.0205	0.568041	-0.0906572	0.0498598	SET	Q01105	Protein SET	SET	6418	fail
5129-12	-0.0205238	0.567591	-0.0906809	0.049836	SREC-I	Q14162	Scavenger receptor class F member 1	SCARF1	8578	fail
3302-58	-0.0210303	0.558069	-0.0911834	0.0493305	CYTF	O76096	Cystatin-F	CST7	8530	fail
3441-64	-0.0210329	0.55802	-0.091186	0.0493279	GSK-3 alpha/beta	P49840|P49841	Glycogen synthase kinase-3 alpha	GSK3A|GSK3B	2931|2932	fail
2843-13	-0.0216319	0.54686	-0.0917803	0.0487301	SPINT2	O43291	Kunitz-type protease inhibitor 2	SPINT2	10653	fail
5201-50	-0.0217451	0.544764	-0.0918925	0.0486171	PDE9A	O76083	High affinity cGMP-specific 3',5'-cyclic phosphodiesterase 9A	PDE9A	5152	fail
3305-6	-0.0222068	0.536255	-0.0923505	0.0481563	DLL4	Q9NR61	Delta-like protein 4	DLL4	54567	fail
4309-59	-0.0223515	0.533602	-0.0924941	0.0480118	Triosephosphate isomerase	P60174	Triosephosphate isomerase	TPI1	7167	fail
5132-71	-0.0226954	0.527322	-0.0928352	0.0476685	TCCR	Q6UWB1	Interleukin-27 receptor subunit alpha	IL27RA	9466	fail
4469-78	-0.0228784	0.523997	-0.0930167	0.0474858	ST4S6	Q7LFX5	Carbohydrate sulfotransferase 15	CHST15	51363	fail
4292-5	-0.0239468	0.504797	-0.0940763	0.0464192	SNAA	P54920	Alpha-soluble NSF attachment protein	NAPA	8775	fail
3077-66	-0.0243666	0.497355	-0.0944927	0.0460001	Coagulation Factor Xa	P00742	Coagulation factor X	F10	2159	fail
4564-2	-0.0245953	0.493326	-0.0947194	0.0457718	PLXC1	O60486	Plexin-C1	PLXNC1	10154	fail
3066-12	-0.0247706	0.490249	-0.0948933	0.0455967	Galectin-3	P17931	Galectin-3	LGALS3	3958	fail
4909-68	-0.0252158	0.482481	-0.0953347	0.0451521	Galectin-8	O00214	Galectin-8	LGALS8	3964	fail
3820-68	-0.0255199	0.477215	-0.0956363	0.0448484	MAPK2	P49137	MAP kinase-activated protein kinase 2	MAPKAPK2	9261	fail
4217-49	-0.0255881	0.476038	-0.0957039	0.0447803	ERAB	Q99714	3-hydroxyacyl-CoA dehydrogenase type-2	HSD17B10	3028	fail
3796-79	-0.0258728	0.471143	-0.0959861	0.044496	ANGL4	Q9BY76	Angiopoietin-related protein 4	ANGPTL4	51129	fail
4220-39	-0.0259173	0.470379	-0.0960303	0.0444515	FER	P16591	Tyrosine-protein kinase Fer	FER	2241	fail
5440-26	-0.0266332	0.458205	-0.0967399	0.0437366	Troponin I, skeletal, fast twitch	P48788	Troponin I, fast skeletal muscle	TNNI2	7136	fail
4282-3	-0.0272691	0.447538	-0.0973704	0.0431014	RAN	P62826	GTP-binding nuclear protein Ran	RAN	5901	fail
2809-25	-0.0274385	0.444721	-0.0975383	0.0429322	ADAMTS-4	O75173	A disintegrin and metalloproteinase with thrombospondin motifs 4	ADAMTS4	9507	fail
3081-70	-0.0277742	0.439168	-0.097871	0.0425969	ULBP-1	Q9BZM6	UL16-binding protein 1	ULBP1	80329	fail
3392-68	-0.0283226	0.430181	-0.0984146	0.042049	PKB a/b/g	P31749|P31751|Q9Y243	RAC-gamma serine/threonine-protein kinase	AKT1|AKT2|AKT3	207|208|10000	fail
4889-82	-0.0285843	0.425931	-0.098674	0.0417875	WNT7A	O00755	Protein Wnt-7a	WNT7A	7476	fail
2972-57	-0.0295177	0.410974	-0.0995989	0.040855	BMP-7	P18075	Bone morphogenetic protein 7	BMP7	655	fail
4155-3	-0.0299415	0.404285	-0.100019	0.0404315	Tenascin	P24821	Tenascin	TNC	3371	fail
3723-1	-0.0302471	0.399504	-0.100322	0.0401261	BNP-32	P16860	Natriuretic peptides B	NPPB	4879	fail
4224-7	-0.0312493	0.384062	-0.101315	0.0391246	HNRPQ	O60506	Heterogeneous nuclear ribonucleoprotein Q	SYNCRIP	10492	fail
2962-50	-0.0323081	0.368149	-0.102364	0.0380662	PTHrP	P12272	Parathyroid hormone-related protein	PTHLH	5744	fail
3189-61	-0.0324991	0.365324	-0.102553	0.0378753	Enterokinase	P98073	Enteropeptidase	TMPRSS15	5651	fail
5138-50	-0.0330662	0.357013	-0.103114	0.0373084	TWEAKR	Q9NP84	Tumor necrosis factor receptor superfamily member 12A	TNFRSF12A	51330	fail
5017-19	-0.0333591	0.352767	-0.103405	0.0370156	Peroxiredoxin-5	P30044	Peroxiredoxin-5, mitochondrial	PRDX5	25824	fail
3206-4	-0.0349379	0.330434	-0.104968	0.0354371	LYVE1	Q9Y5Y7	Lymphatic vessel endothelial hyaluronic acid receptor 1	LYVE1	10894	fail
3809-1	-0.0354065	0.323985	-0.105432	0.0349684	FGFR-3	P22607	Fibroblast growth factor receptor 3	FGFR3	2261	fail
5489-18	-0.0354588	0.32327	-0.105484	0.0349161	Stress-induced-phosphoprotein 1	P31948	Stress-induced-phosphoprotein 1	STIP1	10963	fail
3187-52	-0.0356174	0.32111	-0.105641	0.0347575	CRIS3	P54108	Cysteine-rich secretory protein 3	CRISP3	10321	fail
2585-2	-0.0361731	0.313613	-0.106191	0.0342018	PRL	P01236	Prolactin	PRL	5617	fail
3367-8	-0.0365213	0.308974	-0.106536	0.0338535	FETUB	Q9UGM5	Fetuin-B	FETUB	26998	fail
4973-18	-0.0385861	0.282402	-0.10858	0.031788	cIAP-2	Q13489	Baculoviral IAP repeat-containing protein 3	BIRC3	330	fail
4989-7	-0.038825	0.279431	-0.108816	0.031549	Fibrinogen g-chain dimer	P02679	Fibrinogen gamma chain	FGG	2266	fail
5009-11	-0.0392136	0.274643	-0.109201	0.0311602	Moesin	P26038	Moesin	MSN	4478	fail
3201-49	-0.0396824	0.268942	-0.109664	0.0306911	kallikrein 5	Q9Y337	Kallikrein-5	KLK5	25818	fail
5134-52	-0.0402997	0.261559	-0.110275	0.0300734	TIMD3	Q8TDQ0	Hepatitis A virus cellular receptor 2	HAVCR2	84868	fail
4907-56	-0.042131	0.240484	-0.112087	0.0282405	D-dimer	P02671|P02675|P02679	Fibrinogen beta chain|Fibrinogen alpha chain|Fibrinogen gamma chain	FGA|FGB|FGG	2243|2244|2266	fail
2770-51	-0.0421897	0.239829	-0.112145	0.0281817	I-309	P22362	C-C motif chemokine 1	CCL1	6346	fail
3346-72	-0.0427323	0.233833	-0.112682	0.0276386	AURKB	Q96GD4	Aurora kinase B	AURKB	9212	fail
3848-14	-0.0427962	0.233133	-0.112745	0.0275746	GAPDH, liver	P04406	Glyceraldehyde-3-phosphate dehydrogenase	GAPDH	2597	fail
3173-49	-0.0428887	0.232124	-0.112836	0.027482	ASAHL	Q02083	N-acylethanolamine-hydrolyzing acid amidase	NAAA	27163	fail
4123-60	-0.0435265	0.225248	-0.113467	0.0268436	FGF-4	P08620	Fibroblast growth factor 4	FGF4	2249	fail
3221-54	-0.0444538	0.215511	-0.114384	0.025915	SARP-2	Q8N474	Secreted frizzled-related protein 1	SFRP1	6422	fail
4122-12	-0.0450776	0.209134	-0.115001	0.0252905	discoidin domain receptor 1	Q08345	Epithelial discoidin domain-containing receptor 1	DDR1	780	fail
3422-4	-0.0453493	0.206399	-0.11527	0.0250183	CDK1/cyclin B	P06493|P14635	Cyclin-dependent kinase 1|G2/mitotic-specific cyclin-B1	CDC2|CCNB1	983|891	fail
3858-5	-0.0455921	0.203977	-0.11551	0.0247752	PPAC	P24666	Low molecular weight phosphotyrosine protein phosphatase	ACP1	52	fail
3336-50	-0.0456224	0.203677	-0.11554	0.0247448	TFPI	P10646	Tissue factor pathway inhibitor	TFPI	7035	fail
4923-79	-0.0481643	0.17958	-0.118053	0.0221988	MIS	P03971	Muellerian-inhibiting factor	AMH	268	fail
3171-57	-0.0487796	0.174079	-0.118661	0.0215823	amyloid precursor protein	P05067	Amyloid-beta precursor protein	APP	351	fail
3832-51	-0.048849	0.173466	-0.118729	0.0215127	PTK6	Q13882	Protein-tyrosine kinase 6	PTK6	5753	fail
4970-55	-0.0491457	0.170866	-0.119022	0.0212155	carbonic anhydrase II	P00918	Carbonic anhydrase 2	CA2	760	fail
5013-2	-0.0491891	0.170488	-0.119065	0.021172	NCC27	O00299	Chloride intracellular channel protein 1	CLIC1	1192	fail
4916-2	-0.0493248	0.16931	-0.119199	0.021036	IgD	P01880	Immunoglobulin heavy constant delta	IGHD|IGK@|IGL@	3495|50802|3535	fail
2838-53	-0.0516265	0.150251	-0.121474	0.0187294	MMP-17	Q9ULZ9	Matrix metalloproteinase-17	MMP17	4326	fail
4240-31	-0.0530009	0.139676	-0.122831	0.0173516	M2-PK	P14618	Pyruvate kinase PKM	PKM2	5315	fail
3807-1	-0.0530056	0.139641	-0.122836	0.0173469	FGF23	Q9GZV9	Fibroblast growth factor 23	FGF23	8074	fail
3727-35	-0.0542859	0.130315	-0.1241	0.0160633	PYY	P10082	Peptide YY	PYY	5697	fail
5357-60	-0.0544982	0.128817	-0.12431	0.0158504	NLGNX	Q8N0W4	Neuroligin-4, X-linked	NLGN4X	57502	fail
4479-14	-0.0554537	0.122237	-0.125253	0.0148922	C1-Esterase Inhibitor	P05155	Plasma protease C1 inhibitor	SERPING1	710	fail
4890-10	-0.0564082	0.115928	-0.126196	0.0139349	ACTH	P01189	Pro-opiomelanocortin	POMC	5443	fail
2247-20	-0.0575351	0.108812	-0.127308	0.0128046	EG-VEGF	P58294	Prokineticin-1	PROK1	84432	fail
3356-50	-0.0589055	0.100628	-0.128661	0.0114297	Carbonic anhydrase VII	P43166	Carbonic anhydrase 7	CA7	766	fail
4697-59	-0.0593076	0.0983225	-0.129057	0.0110263	GM-CSF	P04141	Granulocyte-macrophage colony-stimulating factor	CSF2	1437	fail
5346-24	-0.0609953	0.0890995	-0.130723	0.00933264	CPNE1	Q99829	Copine-1	CPNE1	8904	fail
3310-62	-0.0620591	0.0836523	-0.131772	0.00826486	FCG2B	P31994	Low affinity immunoglobulin gamma Fc region receptor II-b	FCGR2B	2213	fail
4717-55	-0.0629054	0.0795138	-0.132607	0.00741527	IL-3	P08700	Interleukin-3	IL3	3562	fail
3831-21	-0.0653809	0.068354	-0.135048	0.0049296	pTEN	P60484	Phosphatidylinositol 3,4,5-trisphosphate 3-phosphatase and dual-specificity protein phosphatase PTEN	PTEN	5728	fail
4468-21	-0.0676058	0.0594527	-0.137242	0.00269487	SPHK2	Q9NRA0	Sphingosine kinase 2	SPHK2	56848	fail
2879-9	-0.0712787	0.0468688	-0.140861	-0.000995806	a1-Antichymotrypsin	P01011	Alpha-1-antichymotrypsin	SERPINA3	12	fail

## Sheet: 1C
1C. Performance of Olink protein EpiScores when tested in the holdout LBC1936 sample (inflammatory n = 150, neurology n = 130) and the subsequent test sets in STRADL (n = 778) and LBC1921 (n=162). Correlation (r) and p-values (p) are provided for the projected EpiScores in relation to true protein measurements. The 36 best-performing (r > 0.1, P < 0.05) EpiScores in the holdout set are shown, wit…
Protein	Olink panel	LC1936 r	LBC193 p	STRADL r	STRDL p	LBC1921 r	LC1921 p	Result
SMPD1	Neurology	0.35069	4.3034e-05	0.118286	0.000947682	0.17404	0.0267638	pass
G.CSF	Neurology	0.338511	8.17238e-05	0.0842562	0.0187466	0.266346	0.000612806	pass
N.CDase	Neurology	0.329058	0.00013204	0.208693	4.19149e-09	0.320965	3.12305e-05	pass
TN.R	Neurology	0.319478	0.000211383	0.011281	0.753398	0.098557	0.212122	fail
FcRL2	Neurology	0.319079	0.000215489	-0.0246538	0.492298	0.357422	3.02404e-06	pass
GZMA	Neurology	0.246677	0.00466579	0.356062	1.14155e-24	0.434719	7.45868e-09	pass
TNFRSF12A	Neurology	0.241441	0.00565186	0.0459385	0.200559	-0.113057	0.152021	fail
DRAXIN	Neurology	0.238834	0.00620881	NA	NA	0.0380773	0.630469	fail
NEP	Neurology	0.203873	0.0199892	NA	NA	0.223574	0.00423793	pass
CRTAM	Neurology	0.203693	0.0201014	0.320627	4.64404e-20	0.245861	0.00161262	pass
SKR3	Neurology	0.193869	0.0270977	0.165596	3.42435e-06	0.201314	0.0102045	pass
NTRK3	Neurology	0.189684	0.0306561	0.190536	8.54846e-08	0.102172	0.195751	pass
SIGLEC1	Neurology	0.188356	0.0318651	NA	NA	0.192598	0.0140716	pass
EDA2R	Neurology	0.167318	0.0570758	0.0327172	0.362114	0.0910906	0.248986	fail
EZR	Neurology	0.161891	0.0657425	-0.0300035	0.403313	0.286725	0.000216336	pass
NMNAT1	Neurology	0.158414	0.0718392	-0.0720458	0.0445447	0.18221	0.020305	pass
IL12	Neurology	0.153821	0.080584	-0.0132652	0.711813	0.0218189	0.782862	fail
GDF.8	Neurology	0.151108	0.0861396	0.126407	0.000408778	-0.0805983	0.307935	pass
EN.RAGE	Inflammatory	0.327256	4.35738e-05	0.23373	4.09726e-11	NA	NA	pass
TGF.alpha	Inflammatory	0.314798	8.7291e-05	NA	NA	NA	NA	pass - based on holdout sample only
FGF.21	Inflammatory	0.258451	0.00140645	NA	NA	NA	NA	pass - based on holdout sample only
CCL11	Inflammatory	0.250363	0.00200144	0.121598	0.000676659	NA	NA	pass
OSM	Inflammatory	0.245441	0.00246731	0.118577	0.000920396	NA	NA	pass
TNFRSF9	Inflammatory	0.235929	0.00365493	0.00311431	0.930889	NA	NA	fail
Flt3L	Inflammatory	0.230965	0.00446036	0.033163	0.355605	NA	NA	fail
CXCL10	Inflammatory	0.228112	0.00499226	0.225456	2.01084e-10	NA	NA	pass
HGF	Inflammatory	0.226781	0.00525924	0.176024	7.79224e-07	NA	NA	pass
VEGFA	Inflammatory	0.213207	0.00880352	0.143783	5.69788e-05	NA	NA	pass
CXCL11	Inflammatory	0.212506	0.00903389	NA	NA	NA	NA	pass - based on holdout sample only
TNFSF14	Inflammatory	0.197791	0.0152584	0.0965449	0.00704178	NA	NA	fail
CD5	Inflammatory	0.177898	0.0294076	0.0125065	0.727622	NA	NA	fail
IL6	Inflammatory	0.157918	0.0536022	0.0247456	0.490687	NA	NA	fail
MMP.1	Inflammatory	0.153469	0.060792	0.178485	5.42333e-07	NA	NA	pass
CXCL9	Inflammatory	0.150653	0.0657387	0.187333	1.41347e-07	NA	NA	pass
CD6	Inflammatory	0.146081	0.074466	NA	NA	NA	NA	pass - based on holdout sample only
IL8	Inflammatory	0.137124	0.0942724	-0.00126438	0.971912	NA	NA	fail

## Sheet: 1D
1D. Annotations for the 109 EpiScore proteins. 84 SOMAscan panel proteins and 25 Olink proteins with naming information. In all results plots, the Entrez Gene Name is used for SOMAscan EpiScores and the Olink protein name is used for Olink panel EpiScores. Functional annotations based on the genes for each protein used in the training of EpiScores are provided, with generalised groupings for prot…
Identifier (SOMAScan SeqId or Olink name)	Protein Panel	Gene Name	Target	UniProt	UniProt full name	String-db Identifier	STRING Functional Annotation	Generalised Grouping
4407-10	SomaScan	MST1	MSP	P26927	Hepatocyte growth factor-like protein	9606.ENSP00000414287	Hepatocyte growth factor-like protein; Macrophage stimulating 1	Growth factor / Immune response
4435-66	SomaScan	ENPP7	ENPP7	Q6UWV6	Ectonucleotide pyrophosphatase/phosphodiesterase family member 7	9606.ENSP00000332656	Ectonucleotide pyrophosphatase/phosphodiesterase family member 7; Converts sphingomyelin to ceramide. Also has phospholipase C activity toward palmitoyl lyso-phosphocholine. Does not appear to have nucleotide pyrophosphatase activity; Belongs to the nucleotide pyrophosphatase/phosphodiesterase family	Lipid signalling
4148-49	SomaScan	PAPPA	PAPP-A	Q13219	Pappalysin-1	9606.ENSP00000330658	Pappalysin-1; Metalloproteinase which specifically cleaves IGFBP-4 and IGFBP-5, resulting in release of bound IGF. Cleavage of IGFBP-4 is dramatically enhanced by the presence of IGF, whereas cleavage of IGFBP-5 is slightly inhibited by the presence of IGF; Belongs to the peptidase M43B family	Immune response
3617-80	SomaScan	HGFAC	HGFA	Q04756	Hepatocyte growth factor activator	9606.ENSP00000421801	Hepatocyte growth factor activator; Activates hepatocyte growth factor (HGF) by converting it from a single chain to a heterodimeric form; Belongs to the peptidase S1 family	Growth factor / tissue regeneration
3440-7	SomaScan	GZMA	granzyme A	P12544	Granzyme A	9606.ENSP00000274306	Granzyme A; Abundant protease in the cytosolic granules of cytotoxic T-cells and NK-cells which activates caspase-independent cell death with morphological features of apoptosis when delivered into the target cell through the immunological synapse. It cleaves after Lys or Arg. Cleaves APEX1 after 'Lys-31' and destroys its oxidative repair activity. Cleaves the nucleosome assembly protein SET afte…	Apoptosis / immune response
3403-1	SomaScan	TPSB2	TPSB2	P20231	Tryptase beta-2	9606.ENSP00000482743	Tryptase beta 2; Belongs to the peptidase S1 family	Immune response / neural
3291-30	SomaScan	FCER2	CD23	P06734	Low affinity immunoglobulin epsilon Fc receptor	9606.ENSP00000264072	Low affinity immunoglobulin epsilon Fc receptor; Low-affinity receptor for immunoglobulin E (IgE) and CR2/CD21. Has essential roles in the regulation of IgE production and in the differentiation of B-cells (it is a B-cell-specific antigen); C-type lectin domain containing	Immune response
3195-50	SomaScan	GNLY	Granulysin	P22749	Granulysin	9606.ENSP00000263863	Granulysin; Antimicrobial protein that kills intracellular pathogens. Active against a broad range of microbes, including Gram-positive and Gram-negative bacteria, fungi, and parasites. Kills Mycobacterium tuberculosis	Antimicrobial / immune response
5124-69	SomaScan	ICAM5	sICAM-5	Q9UMF0	Intercellular adhesion molecule 5	9606.ENSP00000221980	Intercellular adhesion molecule 5; ICAM proteins are ligands for the leukocyte adhesion protein LFA-1 (integrin alpha-L/beta-2); Ig-like cell adhesion molecule family	Cell adhesion
3216-2	SomaScan	PIGR	PIGR	P01833	Polymeric immunoglobulin receptor	9606.ENSP00000348888	Polymeric immunoglobulin receptor; This receptor binds polymeric IgA and IgM at the basolateral surface of epithelial cells. The complex is then transported across the cell to be secreted at the apical surface. During this process a cleavage occurs that separates the extracellular (known as the secretory component) from the transmembrane segment; V-set domain containing	Immune response
5339-49	SomaScan	S100A9	calgranulin B	P06702	Protein S100-A9	9606.ENSP00000357727	Protein S100-A9; S100A9 is a calcium- and zinc-binding protein which plays a prominent role in the regulation of inflammatory processes and immune response. It can induce neutrophil chemotaxis, adhesion, can increase the bactericidal activity of neutrophils by promoting phagocytosis via activation of SYK, PI3K/AKT, and ERK1/2 and can induce degranulation of neutrophils by a MAPK-dependent mechani…	Inflammation / neural signalling
3175-51	SomaScan	ADAMTS13	ATS13	Q76LX8	A disintegrin and metalloproteinase with thrombospondin motifs 13	9606.ENSP00000360997	A disintegrin and metalloproteinase with thrombospondin motifs 13; Cleaves the vWF multimers in plasma into smaller forms thereby controlling vWF-mediated platelet thrombus formation; ADAM metallopeptidases with thrombospondin type 1 motif	Circulatory
3311-27	SomaScan	FCGR3B	FCG3B	O75015	Low affinity immunoglobulin gamma Fc region receptor III-B	9606.ENSP00000433642	Low affinity immunoglobulin gamma Fc region receptor III-B; Receptor for the Fc region of immunoglobulins gamma. Low affinity receptor. Binds complexed or aggregated IgG and also monomeric IgG. Contrary to III-A, is not capable to mediate antibody-dependent cytotoxicity and phagocytosis. May serve as a trap for immune complexes in the peripheral circulation which does not activate neutrophils; CD…	Immune response
4500-50	SomaScan	CLEC11A	SCGF-alpha	Q9Y240	C-type lectin domain family 11 member A	9606.ENSP00000250340	C-type lectin domain family 11 member A; Promotes osteogenesis by stimulating the differentiation of mesenchymal progenitors into mature osteoblasts. Important for repair and maintenance of adult bone (By similarity); C-type lectin domain containing	Repair / maintenance
2948-58	SomaScan	GHR	Growth hormone receptor	P10912	Growth hormone receptor	9606.ENSP00000483403	Growth hormone receptor; Receptor for pituitary gland growth hormone involved in regulating postnatal body growth. On ligand binding, couples to the JAK2/STAT5 pathway (By similarity); Belongs to the type I cytokine receptor family. Type 1 subfamily	Metabolic
2950-57	SomaScan	IGFBP4	IGFBP-4	P22692	Insulin-like growth factor-binding protein 4	9606.ENSP00000269593	Insulin-like growth factor-binding protein 4; IGF-binding proteins prolong the half-life of the IGFs and have been shown to either inhibit or stimulate the growth promoting effects of the IGFs on cell culture. They alter the interaction of IGFs with their cell surface receptors	Metabolic / Growth promoter
2966-65	SomaScan	CLEC11A	SCGF-beta	Q9Y240	C-type lectin domain family 11 member A	9606.ENSP00000250340	C-type lectin domain family 11 member A; Promotes osteogenesis by stimulating the differentiation of mesenchymal progenitors into mature osteoblasts. Important for repair and maintenance of adult bone (By similarity); C-type lectin domain containing	Repair / maintenance
4337-49	SomaScan	CRP	CRP	P02741	C-reactive protein	9606.ENSP00000255030	C-reactive protein; Displays several functions associated with host defense: it promotes agglutination, bacterial capsular swelling, phagocytosis and complement fixation through its calcium-dependent binding to phosphorylcholine. Can interact with DNA and histones and may scavenge nuclear material released from damaged circulating cells; Short pentraxins	Immune response
2579-17	SomaScan	MMP9	MMP-9	P14780	Matrix metalloproteinase-9	9606.ENSP00000361405	Matrix metalloproteinase-9; May play an essential role in local proteolysis of the extracellular matrix and in leukocyte migration. Could play a role in bone osteoclastic resorption. Cleaves KiSS1 at a Gly-|-Leu bond. Cleaves type IV and type V collagen into large C-terminal three quarter fragments and shorter N-terminal one quarter fragments. Degrades fibronectin but not laminin or Pz-peptide; M…	Tissue remodelling / inflammation
4498-62	SomaScan	NCAM1	NCAM-120	P13591	Neural cell adhesion molecule 1	9606.ENSP00000480132	Neural cell adhesion molecule 1; This protein is a cell adhesion molecule involved in neuron-neuron adhesion, neurite fasciculation, outgrowth of neurites, etc; CD molecules	Neural cell adhesion / Neurogenesis
3184-25	SomaScan	F7	Coagulation Factor VII	P08709	Coagulation factor VII	9606.ENSP00000364731	Coagulation factor VII; Initiates the extrinsic pathway of blood coagulation. Serine protease that circulates in the blood in a zymogen form. Factor VII is converted to factor VIIa by factor Xa, factor XIIa, factor IXa, or thrombin by minor proteolysis. In the presence of tissue factor and calcium ions, factor VIIa then converts factor X to factor Xa by limited proteolysis. Factor VIIa will also …	Coagulation
3324-51	SomaScan	LY9	LY9	Q9HBG7	T-lymphocyte surface antigen Ly-9	9606.ENSP00000263285	T-lymphocyte surface antigen Ly-9; Self-ligand receptor of the signaling lymphocytic activation molecule (SLAM) family. SLAM receptors triggered by homo- or heterotypic cell-cell interactions are modulating the activation and differentiation of a wide variety of immune cells and thus are involved in the regulation and interconnection of both innate and adaptive immune response. Activities are con…	Immune response
5034-79	SomaScan	PRSS2	Trypsin 2	P07478	Trypsin-2	9606.ENSP00000485444	Trypsin-2; In the ileum, may be involved in defensin processing, including DEFA5; Belongs to the peptidase S1 family
3343-1	SomaScan	ACY1	Aminoacylase-1	Q03154	Aminoacylase-1	9606.ENSP00000384296	Aminoacylase-1; Involved in the hydrolysis of N-acylated or N-acetylated amino acids (except L-aspartate); Belongs to the peptidase M20A family	Metabolic
5358-3	SomaScan	OMD	OMD	Q99983	Osteomodulin	9606.ENSP00000364700	Osteomodulin; May be implicated in biomineralization processes. Has a function in binding of osteoblasts via the alpha(V)beta(3)- integrin (By similarity); Small leucine rich repeat proteoglycans	Cell structure / cell adhesion
3046-31	SomaScan	RETN	resistin	Q9HD89	Resistin	9606.ENSP00000221515	Resistin; Hormone that seems to suppress insulin ability to stimulate glucose uptake into adipose cells (By similarity). Potentially links obesity to diabetes (By similarity). Promotes chemotaxis in myeloid cells	Metabolic
4568-17	SomaScan	SLITRK5	SLIK5	O94991	SLIT and NTRK-like protein 5	9606.ENSP00000366283	SLIT and NTRK-like protein 5; Suppresses neurite outgrowth; Belongs to the SLITRK family	Neuronal modulation
3448-13	SomaScan	INSR	IR	P06213	Insulin receptor	9606.ENSP00000303830	Insulin receptor; Receptor tyrosine kinase which mediates the pleiotropic actions of insulin. Binding of insulin leads to phosphorylation of several intracellular substrates, including, insulin receptor substrates (IRS1, 2, 3, 4), SHC, GAB1, CBL and other signaling intermediates. Each of these phosphorylated proteins serve as docking proteins for other signaling proteins that contain Src- homolog…	Metabolic
5028-59	SomaScan	CD163	sCD163	Q86VB7	Scavenger receptor cysteine-rich type 1 protein M130	9606.ENSP00000352071	Scavenger receptor cysteine-rich type 1 protein M130; Acute phase-regulated receptor involved in clearance and endocytosis of hemoglobin/haptoglobin complexes by macrophages and may thereby protect tissues from free hemoglobin-mediated oxidative damage. May play a role in the uptake and recycling of iron, via endocytosis of hemoglobin/haptoglobin and subsequent breakdown of heme. Binds hemoglobin…	Immune response
2658-27	SomaScan	NTRK3	TrkC	Q16288	NT-3 growth factor receptor	9606.ENSP00000354207	NT-3 growth factor receptor; Receptor tyrosine kinase involved in nervous system and probably heart development. Upon binding of its ligand NTF3/neurotrophin-3, NTRK3 autophosphorylates and activates different signaling pathways, including the phosphatidylinositol 3-kinase/AKT and the MAPK pathways, that control cell survival and differentiation; I-set domain containing	Neural development / Cell signalling
3292-75	SomaScan	CD48	CD48	P09326	CD48 antigen	9606.ENSP00000484431	CD48 antigen; Ligand for CD2. Might facilitate interaction between activated lymphocytes. Probably involved in regulating T-cell activation	Immune response
4929-55	SomaScan	SHBG	SHBG	P04278	Sex hormone-binding globulin	9606.ENSP00000369816	Sex hormone-binding globulin; Functions as an androgen transport protein, but may also be involved in receptor mediated processes. Each dimer binds one molecule of steroid. Specific for 5-alpha-dihydrotestosterone, testosterone, and 17-beta-estradiol. Regulates the plasma metabolic clearance rate of steroid hormones by controlling their plasma concentration	Metabolic / androgen
4924-32	SomaScan	MMP1	MMP-1	P03956	Interstitial collagenase	9606.ENSP00000322788	Interstitial collagenase; Cleaves collagens of types I, II, and III at one site in the helical domain. Also cleaves collagens of types VII and X. In case of HIV infection, interacts and cleaves the secreted viral Tat protein, leading to a decrease in neuronal Tat's mediated neurotoxicity; Endogenous ligands	Collagen cleavage / neurotoxicity
2580-83	SomaScan	MPO	Myeloperoxidase	P05164	Myeloperoxidase	9606.ENSP00000225275	Myeloperoxidase; Part of the host defense system of polymorphonuclear leukocytes. It is responsible for microbicidal activity against a wide range of organisms. In the stimulated PMN, MPO catalyzes the production of hypohalous acids, primarily hypochlorous acid in physiologic situations, and other toxic intermediates that greatly enhance PMN microbicidal activity; Belongs to the peroxidase family…	Immune response
4831-4	SomaScan	SELL	sL-Selectin	P14151	L-selectin	9606.ENSP00000236147	L-selectin; Cell surface adhesion protein. Mediates the adherence of lymphocytes to endothelial cells of high endothelial venules in peripheral lymph nodes. Promotes initial tethering and rolling of leukocytes in endothelia; C-type lectin domain containing	Immune response / cell adhesion
3152-57	SomaScan	TNFRSF1B	TNF sR-II	P20333	Tumor necrosis factor receptor superfamily member 1B	9606.ENSP00000365435	Tumor necrosis factor receptor superfamily member 1B; Receptor with high affinity for TNFSF2/TNF-alpha and approximately 5-fold lower affinity for homotrimeric TNFSF1/lymphotoxin-alpha. The TRAF1/TRAF2 complex recruits the apoptotic suppressors BIRC2 and BIRC3 to TNFRSF1B/TNFR2. This receptor mediates most of the metabolic effects of TNF-alpha. Isoform 2 blocks TNF-alpha-induced apoptosis, which …	Immune response
2967-8	SomaScan	VCAM1	VCAM-1	P19320	Vascular cell adhesion protein 1	9606.ENSP00000294728	Vascular cell adhesion protein 1; Important in cell-cell recognition. Appears to function in leukocyte-endothelial cell adhesion. Interacts with integrin alpha-4/beta-1 (ITGA4/ITGB1) on leukocytes, and mediates both adhesion and signal transduction. The VCAM1/ITGA4/ITGB1 interaction may play a pathophysiologic role both in immune responses and in leukocyte emigration to sites of inflammation; C2-…	Vascular / immune response
5000-52	SomaScan	LGALS3BP	LG3BP	Q08380	Galectin-3-binding protein	9606.ENSP00000262776	Galectin-3-binding protein; Promotes integrin-mediated cell adhesion. May stimulate host defense against viruses and tumor cells; BTB domain containing	Cell adhesion
3038-9	SomaScan	CXCL11	I-TAC	O14625	C-X-C motif chemokine 11	9606.ENSP00000306884	C-X-C motif chemokine 11; Chemotactic for interleukin-activated T-cells but not unstimulated T-cells, neutrophils or monocytes. Induces calcium release in activated T-cells. Binds to CXCR3. May play an important role in CNS diseases which involve T-cell recruitment. May play a role in skin immune responses; Belongs to the intercrine alpha (chemokine CxC) family	Immune response
3169-70	SomaScan	IDUA	IDUA	P35475	Alpha-L-iduronidase	9606.ENSP00000247933	Alpha-L-iduronidase; Iduronidase, alpha-L-	Cell signalling / hydrolysis
3060-43	SomaScan	C9	C9	P02748	Complement component C9	9606.ENSP00000263408	Complement component C9; Constituent of the membrane attack complex (MAC) that plays a key role in the innate and adaptive immune response by forming pores in the plasma membrane of target cells. C9 is the pore- forming subunit of the MAC; Belongs to the complement C6/C7/C8/C9 family	Immune response
2665-26	SomaScan	TNFRSF17	BCMA	Q02223	Tumor necrosis factor receptor superfamily member 17	9606.ENSP00000053243	Tumor necrosis factor receptor superfamily member 17; Receptor for TNFSF13B/BLyS/BAFF and TNFSF13/APRIL. Promotes B-cell survival and plays a role in the regulation of humoral immunity. Activates NF-kappa-B and JNK; CD molecules	Immune response
2516-57	SomaScan	CCL21	6Ckine	O00585	C-C motif chemokine 21	9606.ENSP00000259607	C-C motif chemokine 21; Inhibits hemopoiesis and stimulates chemotaxis. Chemotactic in vitro for thymocytes and activated T-cells, but not for B-cells, macrophages, or neutrophils. Shows preferential activity towards naive T-cells. May play a role in mediating homing of lymphocytes to secondary lymphoid organs. Binds to atypical chemokine receptor ACKR4 and mediates the recruitment of beta-arrest…	Immune response
2780-35	SomaScan	LTF	Lactoferrin	P02788	Lactotransferrin	9606.ENSP00000231751	Lactotransferrin; Lactoferroxins A, B and C have opioid antagonist activity. Lactoferroxin A shows preference for mu-receptors, while lactoferroxin B and C have somewhat higher degrees of preference for kappa-receptors than for mu-receptors; Transferrins	Iron binding / Immune response
4763-31	SomaScan	AFM	Afamin	P43652	Afamin	9606.ENSP00000226355	Afamin; Vitamin E binding protein. May transport vitamin E in body fluids under conditions where the lipoprotein system is not sufficient. May be involved in the regulation and transport of vitamin E at the blood-brain barrier; Belongs to the ALB/AFP/VDB family	Membrane transport
3485-28	SomaScan	B2M	b2-Microglobulin	P61769	Beta-2-microglobulin	9606.ENSP00000452780	Beta-2-microglobulin; Component of the class I major histocompatibility complex (MHC). Involved in the presentation of peptide antigens to the immune system. Exogenously applied M.tuberculosis EsxA or EsxA-EsxB (or EsxA expressed in host) binds B2M and decreases its export to the cell surface (total protein levels do not change), probably leading to defects in class I antigen presentation; Belong…	Immune response
2771-35	SomaScan	IGFBP1	IGFBP-1	P08833	Insulin-like growth factor-binding protein 1	9606.ENSP00000275525	Insulin-like growth factor-binding protein 1; IGF-binding proteins prolong the half-life of the IGFs and have been shown to either inhibit or stimulate the growth promoting effects of the IGFs on cell culture. They alter the interaction of IGFs with their cell surface receptors. Promotes cell migration	Metabolic / Growth promoter
4481-34	SomaScan	C4A|C4B	C4	P0C0L4|P0C0L5	Complement C4-A|Complement C4-B	9606.ENSP00000396688 | 9606.ENSP00000415941	Complement C4-A; Non-enzymatic component of C3 and C5 convertases and thus essential for the propagation of the classical complement pathway. Covalently binds to immunoglobulins and immune complexes and enhances the solubilization of immune aggregates and the clearance of IC through CR1 on erythrocytes. C4A isotype is responsible for effective binding to form amide bonds with immune aggregates or…	Immune response
3505-6	SomaScan	LTA|LTB	Lymphotoxin a1/b2	P01374|Q06643	Lymphotoxin-alpha|Lymphotoxin-beta	9606.ENSP00000403495 | 9606.ENSP00000410481	Lymphotoxin-alpha; Cytokine that in its homotrimeric form binds to TNFRSF1A/TNFR1, TNFRSF1B/TNFBR and TNFRSF14/HVEM. In its heterotrimeric form with LTB binds to TNFRSF3/LTBR. Lymphotoxin is produced by lymphocytes and cytotoxic for a wide range of tumor cells in vitro and in vivo; Tumor necrosis factor superfamily | Lymphotoxin-beta; Cytokine that binds to LTBR/TNFRSF3. May play a specific role …	Immune response
3041-55	SomaScan	MRC2	MRC2	Q9UBG0	C-type mannose receptor 2	9606.ENSP00000307513	C-type mannose receptor 2; May play a role as endocytotic lectin receptor displaying calcium-dependent lectin activity. Internalizes glycosylated ligands from the extracellular space for release in an endosomal compartment via clathrin-mediated endocytosis. May be involved in plasminogen activation system controlling the extracellular level of PLAUR/PLAU, and thus may regulate protease activity a…	Cell structure / cell adhesion
3470-1	SomaScan	SELE	sE-Selectin	P16581	E-selectin	9606.ENSP00000331736	E-selectin; Cell-surface glycoprotein having a role in immunoadhesion. Mediates in the adhesion of blood neutrophils in cytokine-activated endothelium through interaction with PSGL1/SELPLG. May have a role in capillary morphogenesis; Belongs to the selectin/LECAM family	Immune response / cell adhesion
3554-24	SomaScan	ADIPOQ	Adiponectin	Q15848	Adiponectin	9606.ENSP00000389814	Adiponectin; Important adipokine involved in the control of fat metabolism and insulin sensitivity, with direct anti-diabetic, anti-atherogenic and anti-inflammatory activities. Stimulates AMPK phosphorylation and activation in the liver and the skeletal muscle, enhancing glucose utilization and fatty-acid combustion. Antagonizes TNF-alpha by negatively regulating its expression in various tissue…	Metabolic
4990-87	SomaScan	GP1BA	GP1BA	P07359	Platelet glycoprotein Ib alpha chain	9606.ENSP00000329380	Platelet glycoprotein Ib alpha chain; GP-Ib, a surface membrane protein of platelets, participates in the formation of platelet plugs by binding to the A1 domain of vWF, which is already bound to the subendothelium; CD molecules	Coagulation
4920-10	SomaScan	LYZ	Lysozyme	P61626	Lysozyme C	9606.ENSP00000261267	Lysozyme C; Lysozymes have primarily a bacteriolytic function; those in tissues and body fluids are associated with the monocyte- macrophage system and enhance the activity of immunoagents; Lysozymes, c-type	Immune response
2851-63	SomaScan	C5	C5a	P01031	Complement C5	9606.ENSP00000223642	Complement C5; Activation of C5 by a C5 convertase initiates the spontaneous assembly of the late complement components, C5-C9, into the membrane attack complex. C5b has a transient binding site for C6. The C5b-C6 complex is the foundation upon which the lytic complex is assembled; C3 and PZP like, alpha-2-macroglobulin domain containing	Immune response
3293-2	SomaScan	CD5L	CD5L	O43866	CD5 antigen-like	9606.ENSP00000357156	CD5 antigen-like; Secreted protein that acts as a key regulator of lipid synthesis: mainly expressed by macrophages in lymphoid and inflammed tissues and regulates mechanisms in inflammatory responses, such as infection or atherosclerosis. Able to inhibit lipid droplet size in adipocytes. Following incorporation into mature adipocytes via CD36-mediated endocytosis, associates with cytosolic FASN,…	Immune response
4496-60	SomaScan	MMP12	MMP-12	P39900	Macrophage metalloelastase	9606.ENSP00000458585	Macrophage metalloelastase; May be involved in tissue injury and remodeling. Has significant elastolytic activity. Can accept large and small amino acids at the P1' site, but has a preference for leucine. Aromatic or hydrophobic residues are preferred at the P1 site, with small hydrophobic residues (preferably alanine) occupying P3; Belongs to the peptidase M10A family	Tissue remodelling / inflammation
2687-2	SomaScan	MIA	MIA	Q16674	Melanoma-derived growth regulatory protein	9606.ENSP00000263369	Melanoma-derived growth regulatory protein; Elicits growth inhibition on melanoma cells in vitro as well as some other neuroectodermal tumors, including gliomas; Belongs to the MIA/OTOR family	Growth factor regulation
3316-58	SomaScan	SERPIND1	Heparin cofactor II	P05546	Heparin cofactor 2	9606.ENSP00000215727	Heparin cofactor 2; Thrombin inhibitor activated by the glycosaminoglycans, heparin or dermatan sulfate. In the presence of the latter, HC-II becomes the predominant thrombin inhibitor in place of antithrombin III (AT-III). Also inhibits chymotrypsin, but in a glycosaminoglycan-independent manner; Belongs to the serpin family	Coagulation
3473-78	SomaScan	MPL	Thrombopoietin Receptor	P40238	Thrombopoietin receptor	9606.ENSP00000361548	Thrombopoietin receptor; Receptor for thrombopoietin. May represent a regulatory molecule specific for TPO-R-dependent immune responses; Belongs to the type I cytokine receptor family. Type 1 subfamily	Immune response / platelet production
2982-82	SomaScan	LGALS4	Galectin-4	P56470	Galectin-4	9606.ENSP00000302100	Galectin-4; Galectin that binds lactose and a related range of sugars. May be involved in the assembly of adherens junctions; Galectins	Cell adhesion
3298-52	SomaScan	CNTN4	Contactin-4	Q8IWV2	Contactin-4	9606.ENSP00000380602	Contactin-4; Contactins mediate cell surface interactions during nervous system development. Has some neurite outgrowth-promoting activity. May be involved in synaptogenesis; Fibronectin type III domain containing	Cell adhesion / maintenance
3044-3	SomaScan	CCL18	PARC	P55774	C-C motif chemokine 18	9606.ENSP00000479955	C-C motif chemokine 18; Chemotactic factor that attracts lymphocytes but not monocytes or granulocytes. May be involved in B-cell migration into B-cell follicles in lymph nodes. Attracts naive T-lymphocytes toward dendritic cells and activated macrophages in lymph nodes, has chemotactic activity for naive T-cells, CD4+ and CD8+ T-cells and thus may play a role in both humoral and cell-mediated im…	Immune response
5107-7	SomaScan	NOTCH1	Notch 1	P46531	Neurogenic locus notch homolog protein 1	9606.ENSP00000277541	Neurogenic locus notch homolog protein 1; Functions as a receptor for membrane-bound ligands Jagged1, Jagged2 and Delta1 to regulate cell-fate determination. Upon ligand activation through the released notch intracellular domain (NICD) it forms a transcriptional activator complex with RBPJ/RBPSUH and activates genes of the enhancer of split locus. Affects the implementation of differentiation, pr…	Cell signalling
4153-11	SomaScan	SERPINA3	alpha-1-antichymotrypsin complex	P01011	Alpha-1-antichymotrypsin	9606.ENSP00000376793	Serpin peptidase inhibitor, clade A (alpha-1 antiproteinase, antitrypsin), member 3; Although its physiological function is unclear, it can inhibit neutrophil cathepsin G and mast cell chymase, both of which can convert angiotensin-1 to the active angiotensin-2; Serpin peptidase inhibitors	Enzymatic pathways / coagulation
3805-16	SomaScan	ESM1	Endocan	Q9NQ30	Endothelial cell-specific molecule 1	9606.ENSP00000370812	Endothelial cell-specific molecule 1; Involved in angiogenesis; promotes angiogenic sprouting. May have potent implications in lung endothelial cell-leukocyte interactions	Vascular
3339-33	SomaScan	THBS2	TSP2	P35442	Thrombospondin-2	9606.ENSP00000355751	Thrombospondin-2; Adhesive glycoprotein that mediates cell-to-cell and cell-to-matrix interactions. Ligand for CD36 mediating antiangiogenic properties	Cell adhesion
4160-49	SomaScan	MMP2	MMP-2	P08253	72 kDa type IV collagenase	9606.ENSP00000219070	72 kDa type IV collagenase; Ubiquitinous metalloproteinase that is involved in diverse functions such as remodeling of the vasculature, angiogenesis, tissue repair, tumor invasion, inflammation, and atherosclerotic plaque rupture. As well as degrading extracellular matrix proteins, can also act on several nonmatrix proteins such as big endothelial 1 and beta-type CGRP promoting vasoconstriction. …	Tissue remodelling / inflammation / vascular
3079-62	SomaScan	RARRES2	TIG2	Q99969	Retinoic acid receptor responder protein 2	9606.ENSP00000418009	Retinoic acid receptor responder protein 2; Adipocyte-secreted protein (adipokine) that regulates adipogenesis, metabolism and inflammation through activation of the chemokine-like receptor 1 (CMKLR1). Its other ligands include G protein-coupled receptor 1 (GPR1) and chemokine receptor-like 2 (CCRL2). Positively regulates adipocyte differentiation, modulates the expression of adipocyte genes invo…	Metabolic
3519-3	SomaScan	CCL17	TARC	Q92583	C-C motif chemokine 17	9606.ENSP00000219244	C-C motif chemokine 17; Chemotactic factor for T-lymphocytes but not monocytes or granulocytes. May play a role in T-cell development in thymus and in trafficking and activation of mature T-cells. Binds to CCR4; Belongs to the intercrine beta (chemokine CC) family	Immune response
3035-80	SomaScan	IL19	IL-19	Q9UHD0	Interleukin-19	9606.ENSP00000343000	Interleukin-19; May play some important roles in inflammatory responses. Up-regulates IL-6 and TNF-alpha and induces apoptosis (By similarity); Interleukins	Immune response
5363-51	SomaScan	SEMA3E	Semaphorin 3E	O15041	Semaphorin-3E	9606.ENSP00000303212	Semaphorin-3E; Plays an important role in signaling via the cell surface receptor PLXND1. Mediates reorganization of the actin cytoskeleton, leading to the retraction of cell projections. Promotes focal adhesion disassembly and inhibits adhesion of endothelial cells to the extracellular matrix. Regulates angiogenesis, both during embryogenesis and after birth. Can down- regulate sprouting angioge…	Cell signalling / neural guidance / vascular
3235-50	SomaScan	WFIKKN2	WFKN2	Q8TEU8	WAP, Kazal, immunoglobulin, Kunitz and NTR domain-containing protein 2	9606.ENSP00000311184	WAP, Kazal, immunoglobulin, Kunitz and NTR domain-containing protein 2; Protease-inhibitor that contains multiple distinct protease inhibitor domains. Probably has serine protease- and metalloprotease-inhibitor activity. Inhibits the biological activity of mature myostatin, but not activin (By similarity); Belongs to the WFIKKN family	Growth factor
2705-5	SomaScan	CCL25	TECK	O15444	C-C motif chemokine 25	9606.ENSP00000375086	C-C motif chemokine 25; Potentially involved in T-cell development. Recombinant protein shows chemotactic activity on thymocytes, macrophages, THP-1 cells, and dendritics cells but is inactive on peripheral blood lymphocytes and neutrophils. Binds to CCR9. Isoform 2 is an antagonist of isoform 1. Binds to atypical chemokine receptor ACKR4 and mediates the recruitment of beta-arrestin (ARRB1/2) to…	Immune response
3600-2	SomaScan	CHIT1	Chitotriosidase-1	Q13231	Chitotriosidase-1	9606.ENSP00000356198	Chitotriosidase-1; Degrades chitin, chitotriose and chitobiose. May participate in the defense against nematodes and other pathogens. Isoform 3 has no enzymatic activity; Belongs to the glycosyl hydrolase 18 family. Chitinase class II subfamily	Immune response
4141-79	SomaScan	CXCL10	IP-10	P02778	C-X-C motif chemokine 10	9606.ENSP00000305651	C-X-C motif chemokine 10; Chemotactic for monocytes and T-lymphocytes. Binds to CXCR3; Belongs to the intercrine alpha (chemokine CxC) family	Immune response
3348-49	SomaScan	BMP1	BMP-1	P13497	Bone morphogenetic protein 1	9606.ENSP00000305714	Bone morphogenetic protein 1; Cleaves the C-terminal propeptides of procollagen I, II and III. Induces cartilage and bone formation. May participate in dorsoventral patterning during early development by cleaving chordin (CHRD). Responsible for the proteolytic activation of lysyl oxidase LOX; Astacins	Repair / maintenance
3029-52	SomaScan	CD209	DC-SIGN	Q9NNX6	CD209 antigen	9606.ENSP00000315477	CD209 antigen; Pathogen-recognition receptor expressed on the surface of immature dendritic cells (DCs) and involved in initiation of primary immune response. Thought to mediate the endocytosis of pathogens which are subsequently degraded in lysosomal compartments. The receptor returns to the cell membrane surface and the pathogen-derived antigens are presented to resting T-cells via MHC class II…	Immune response
3508-78	SomaScan	CCL22	MDC	O00626	C-C motif chemokine 22	9606.ENSP00000219235	C-C motif chemokine 22; May play a role in the trafficking of activated/effector T-lymphocytes to inflammatory sites and other aspects of activated T-lymphocyte physiology. Chemotactic for monocytes, dendritic cells and natural killer cells. Mild chemoattractant for primary activated T-lymphocytes and a potent chemoattractant for chronically activated T-lymphocytes but has no chemoattractant acti…	Immune response
2816-50	SomaScan	BCAM	BCAM	P50895	Basal cell adhesion molecule	9606.ENSP00000270233	Basal cell adhesion molecule; Laminin alpha-5 receptor. May mediate intracellular signaling; Blood group antigens	Cell signalling
2826-53	SomaScan	EDA	EDA	Q92838	Ectodysplasin-A	9606.ENSP00000363680	Ectodysplasin-A; Cytokine which is involved in epithelial-mesenchymal signaling during morphogenesis of ectodermal organs. Functions as a ligand activating the DEATH-domain containing receptors EDAR and EDA2R. May also play a role in cell adhesion (By similarity); Tumor necrosis factor superfamily	Cell adhesion / immune response
5491-12	SomaScan	SPOCK2	Testican-2	Q92563	Testican-2	9606.ENSP00000362201	Testican-2; May participate in diverse steps of neurogenesis. Binds calcium; SPARC family	Neurogenesis
5029-3	SomaScan	FAP	SEPR	Q12884	Prolyl endopeptidase FAP	9606.ENSP00000188790	Prolyl endopeptidase FAP; Cell surface glycoprotein serine protease that participates in extracellular matrix degradation and involved in many cellular processes including tissue remodeling, fibrosis, wound healing, inflammation and tumor growth. Both plasma membrane and soluble forms exhibit post-proline cleaving endopeptidase activity, with a marked preference for Ala/Ser-Gly-Pro-Ser/Asn/Ala co…	Tissue remodelling / inflammation
4930-21	SomaScan	STC1	Stanniocalcin-1	P52823	Stanniocalcin-1	9606.ENSP00000290271	Stanniocalcin-1; Stimulates renal phosphate reabsorption, and could therefore prevent hypercalcemia	Metabolic
CRTAM	Olink Neurology	CRTAM	N/A	N/A	N/A	9606.ENSP00000227348	Cytotoxic and regulatory T-cell molecule; Interaction with CADM1 promotes natural killer (NK) cell cytotoxicity and interferon-gamma (IFN-gamma) secretion by CD8+ cells in vitro as well as NK cell-mediated rejection of tumors expressing CADM3 in vivo; Belongs to the nectin family	Immune response
EZR	Olink Neurology	EZR	N/A	N/A	N/A	9606.ENSP00000356042	Ezrin; Probably involved in connections of major cytoskeletal structures to the plasma membrane. In epithelial cells, required for the formation of microvilli and membrane ruffles on the apical pole. Along with PLEKHG6, required for normal macropinocytosis; A-kinase anchoring proteins	Cell adhesion
FcRL2	Olink Neurology	FCRL2	N/A	N/A	N/A	9606.ENSP00000355157	Fc receptor-like protein 2; May have an regulatory role in normal and neoplastic B cell development; CD molecules	Immune response
G.CSF	Olink Neurology	CSF3	N/A	N/A	N/A	9606.ENSP00000225474	Granulocyte colony-stimulating factor; Granulocyte/macrophage colony-stimulating factors are cytokines that act in hematopoiesis by controlling the production, differentiation, and function of 2 related white cell populations of the blood, the granulocytes and the monocytes-macrophages. This CSF induces granulocytes; Belongs to the IL-6 superfamily	Immune response
GDF.8	Olink Neurology	MSTN	N/A	N/A	N/A	9606.ENSP00000260950	Growth/differentiation factor 8; Acts specifically as a negative regulator of skeletal muscle growth; Belongs to the TGF-beta family	Growth factor
GZMA	Olink Neurology	GZMA	N/A	N/A	N/A	9606.ENSP00000274306	Granzyme A; Abundant protease in the cytosolic granules of cytotoxic T-cells and NK-cells which activates caspase-independent cell death with morphological features of apoptosis when delivered into the target cell through the immunological synapse. It cleaves after Lys or Arg. Cleaves APEX1 after 'Lys-31' and destroys its oxidative repair activity. Cleaves the nucleosome assembly protein SET afte…	Apoptosis / immune response
NEP	Olink Neurology	MME	N/A	N/A	N/A	9606.ENSP00000418525	Neprilysin; Thermolysin-like specificity, but is almost confined on acting on polypeptides of up to 30 amino acids. Biologically important in the destruction of opioid peptides such as Met- and Leu-enkephalins by cleavage of a Gly-Phe bond. Able to cleave angiotensin-1, angiotensin-2 and angiotensin 1-9. Involved in the degradation of atrial natriuretic factor (ANF). Displays UV-inducible elastas…	Neurotransmitter cleavage
N.CDase	Olink Neurology	ASAH2	N/A	N/A	N/A	9606.ENSP00000378897	Neutral ceramidase; Hydrolyzes the sphingolipid ceramide into sphingosine and free fatty acid at an optimal pH of 6.5-8.5. Acts as a key regulator of sphingolipid signaling metabolites by generating sphingosine at the cell surface. Acts as a repressor of apoptosis both by reducing C16-ceramide, thereby preventing ceramide-induced apoptosis, and generating sphingosine, a precursor of the antiapopt…	Lipid signalling
NMNAT1	Olink Neurology	NMNAT1	N/A	N/A	N/A	9606.ENSP00000366410	Nicotinamide/nicotinic acid mononucleotide adenylyltransferase 1; Catalyzes the formation of NAD(+) from nicotinamide mononucleotide (NMN) and ATP. Can also use the deamidated form; nicotinic acid mononucleotide (NaMN) as substrate with the same efficiency. Can use triazofurin monophosphate (TrMP) as substrate. Also catalyzes the reverse reaction, i.e. the pyrophosphorolytic cleavage of NAD(+). F…	Neuroprotection / Cell signalling
NTRK3	Olink Neurology	NTRK3	N/A	N/A	N/A	9606.ENSP00000354207	NT-3 growth factor receptor; Receptor tyrosine kinase involved in nervous system and probably heart development. Upon binding of its ligand NTF3/neurotrophin-3, NTRK3 autophosphorylates and activates different signaling pathways, including the phosphatidylinositol 3-kinase/AKT and the MAPK pathways, that control cell survival and differentiation; I-set domain containing	Neural development / Cell signalling
SKR3	Olink Neurology	ACVRL1	N/A	N/A	N/A	9606.ENSP00000373574	Serine/threonine-protein kinase receptor R3; Type I receptor for TGF-beta family ligands BMP9/GDF2 and BMP10 and important regulator of normal blood vessel development. On ligand binding, forms a receptor complex consisting of two type II and two type I transmembrane serine/threonine kinases. Type II receptors phosphorylate and activate type I receptors which autophosphorylate, then bind and acti…	Vascular
SIGLEC1	Olink Neurology	SIGLEC1	N/A	N/A	N/A	9606.ENSP00000341141	Sialoadhesin; Acts as an endocytic receptor mediating clathrin dependent endocytosis. Macrophage-restricted adhesion molecule that mediates sialic-acid dependent binding to lymphocytes, including granulocytes, monocytes, natural killer cells, B-cells and CD8 T-cells. Preferentially binds to alpha-2,3-linked sialic acid (By similarity). Binds to SPN/CD43 on T-cells (By similarity). May play a role…	Vesicular trafficking / immune response
SMPD1	Olink Neurology	SMPD1	N/A	N/A	N/A	9606.ENSP00000340409	Sphingomyelin phosphodiesterase; Converts sphingomyelin to ceramide. Also has phospholipase C activities toward 1,2-diacylglycerolphosphocholine and 1,2-diacylglycerolphosphoglycerol	Lipid signalling
CCL11	Olink Inflammatory	CCL11	N/A	N/A	N/A	9606.ENSP00000302234	Eotaxin; In response to the presence of allergens, this protein directly promotes the accumulation of eosinophils, a prominent feature of allergic inflammatory reactions. Binds to CCR3; Chemokine ligands	Immune response
CD6	Olink Inflammatory	CD6	N/A	N/A	N/A	9606.ENSP00000323280	T-cell differentiation antigen CD6; Cell adhesion molecule that mediates cell-cell contacts and regulates T-cell responses via its interaction with ALCAM/CD166. Contributes to signaling cascades triggered by activation of the TCR/CD3 complex. Functions as costimulatory molecule; promotes T-cell activation and proliferation. Contributes to the formation and maturation of the immunological synapse.…	Immune response
CXCL10	Olink Inflammatory	CXCL10	N/A	N/A	N/A	9606.ENSP00000305651	C-X-C motif chemokine 10; Chemotactic for monocytes and T-lymphocytes. Binds to CXCR3; Belongs to the intercrine alpha (chemokine CxC) family	Immune response
CXCL11	Olink Inflammatory	CXCL11	N/A	N/A	N/A	9606.ENSP00000306884	C-X-C motif chemokine 11; Chemotactic for interleukin-activated T-cells but not unstimulated T-cells, neutrophils or monocytes. Induces calcium release in activated T-cells. Binds to CXCR3. May play an important role in CNS diseases which involve T-cell recruitment. May play a role in skin immune responses; Belongs to the intercrine alpha (chemokine CxC) family	Immune response
CXCL9	Olink Inflammatory	CXCL9	N/A	N/A	N/A	9606.ENSP00000354901	C-X-C motif chemokine 9; Cytokine that affects the growth, movement, or activation state of cells that participate in immune and inflammatory response. Chemotactic for activated T-cells. Binds to CXCR3; Belongs to the intercrine alpha (chemokine CxC) family	Immune response
EN.RAGE	Olink Inflammatory	S100A12	N/A	N/A	N/A	9606.ENSP00000357726	Protein S100-A12; S100A12 is a calcium-, zinc- and copper-binding protein which plays a prominent role in the regulation of inflammatory processes and immune response. Its proinflammatory activity involves recruitment of leukocytes, promotion of cytokine and chemokine production, and regulation of leukocyte adhesion and migration. Acts as an alarmin or a danger associated molecular pattern (DAMP)…	Inflammation
TGF.alpha	Olink Inflammatory	TGFA	N/A	N/A	N/A	9606.ENSP00000295400	Protransforming growth factor alpha; TGF alpha is a mitogenic polypeptide that is able to bind to the EGF receptor/EGFR and to act synergistically with TGF beta to promote anchorage-independent cell proliferation in soft agar	Growth factor
FGF.21	Olink Inflammatory	FGF21	N/A	N/A	N/A	9606.ENSP00000471477	Fibroblast growth factor 21; Stimulates glucose uptake in differentiated adipocytes via the induction of glucose transporter SLC2A1/GLUT1 expression (but not SLC2A4/GLUT4 expression). Activity requires the presence of KLB; Belongs to the heparin-binding growth factors family	Metabolic
HGF	Olink Inflammatory	HGF	N/A	N/A	N/A	9606.ENSP00000222390	Hepatocyte growth factor; Potent mitogen for mature parenchymal hepatocyte cells, seems to be a hepatotrophic factor, and acts as a growth factor for a broad spectrum of tissues and cell types. Activating ligand for the receptor tyrosine kinase MET by binding to it and promoting its dimerization; Deafness associated genes	Growth factor / tissue regeneration
OSM	Olink Inflammatory	OSM	N/A	N/A	N/A	9606.ENSP00000215781	Oncostatin-M; Growth regulator. Inhibits the proliferation of a number of tumor cell lines. Stimulates proliferation of AIDS-KS cells. It regulates cytokine production, including IL-6, G-CSF and GM-CSF from endothelial cells. Uses both type I OSM receptor (heterodimers composed of LIPR and IL6ST) and type II OSM receptor (heterodimers composed of OSMR and IL6ST). Involved in the maturation of fet…	Immune response / cell proliferation
VEGFA	Olink Inflammatory	VEGFA	N/A	N/A	N/A	9606.ENSP00000478570	Vascular endothelial growth factor A; Growth factor active in angiogenesis, vasculogenesis and endothelial cell growth. Induces endothelial cell proliferation, promotes cell migration, inhibits apoptosis and induces permeabilization of blood vessels. Binds to the FLT1/VEGFR1 and KDR/VEGFR2 receptors, heparan sulfate and heparin. NRP1/Neuropilin-1 binds isoforms VEGF-165 and VEGF-145. Isoform VEGF…	Growth factor / vascular
MMP.1	Olink Inflammatory	MMP1	N/A	N/A	N/A	9606.ENSP00000322788	Interstitial collagenase; Cleaves collagens of types I, II, and III at one site in the helical domain. Also cleaves collagens of types VII and X. In case of HIV infection, interacts and cleaves the secreted viral Tat protein, leading to a decrease in neuronal Tat's mediated neurotoxicity; Endogenous ligands	Collagen cleavage / neurotoxicity

## Sheet: 1E
1E. Predictor weights for the 109 EpiScores from Olink and SomaScan panels which passed testing in independent cohorts. The weights listed were used to project EpiScores into Generation Scotland and were calculated using the full training sets available (LBC1936 for the Olink panels with inflammatory n=875 and neurology n=706; KORA for the SomaScan panel with n=944). 84 SomaScan EpiScores and 25 …
Identifier	Gene Name	Panel	Training cohort	CpG Site	CpG Coeficient	CpG Chromosome	CpG Position	Gene Start	Gene End	Gene Chromosome	CpG Status
2516-57	CCL21	SomaScan	KORA	cg07900968	0.00714229	19	36909326	34710136	34709005	9	TRANS
2516-57	CCL21	SomaScan	KORA	cg18542688	0.00829481	2	241290875	34710136	34709005	9	TRANS
2516-57	CCL21	SomaScan	KORA	cg12716639	-0.00108803	11	119234198	34710136	34709005	9	TRANS
2516-57	CCL21	SomaScan	KORA	cg01175020	-0.0154262	10	102896475	34710136	34709005	9	TRANS
2516-57	CCL21	SomaScan	KORA	cg17170088	0.023436	8	145159375	34710136	34709005	9	TRANS
2516-57	CCL21	SomaScan	KORA	cg12471789	-0.00469084	1	150529664	34710136	34709005	9	TRANS
2516-57	CCL21	SomaScan	KORA	cg06532856	-0.0093856	11	68762338	34710136	34709005	9	TRANS
2516-57	CCL21	SomaScan	KORA	cg10021295	-0.00425417	16	66731183	34710136	34709005	9	TRANS
2516-57	CCL21	SomaScan	KORA	cg17582545	0.0103839	7	157647847	34710136	34709005	9	TRANS
2516-57	CCL21	SomaScan	KORA	cg12116137	0.0145768	17	1576449	34710136	34709005	9	TRANS
2516-57	CCL21	SomaScan	KORA	cg14710552	0.00122159	7	134832584	34710136	34709005	9	TRANS
2516-57	CCL21	SomaScan	KORA	cg10563109	-0.00395044	6	5087749	34710136	34709005	9	TRANS
2516-57	CCL21	SomaScan	KORA	cg02155829	0.00315867	1	39325484	34710136	34709005	9	TRANS
2516-57	CCL21	SomaScan	KORA	cg21495612	0.00338263	14	96342250	34710136	34709005	9	TRANS
2516-57	CCL21	SomaScan	KORA	cg16253537	0.0142579	5	131132836	34710136	34709005	9	TRANS
2516-57	CCL21	SomaScan	KORA	cg00466364	0.00534846	19	11592764	34710136	34709005	9	TRANS
2516-57	CCL21	SomaScan	KORA	cg02861056	0.00176278	2	68592345	34710136	34709005	9	TRANS
2516-57	CCL21	SomaScan	KORA	cg25259697	0.000787369	7	1989360	34710136	34709005	9	TRANS
2516-57	CCL21	SomaScan	KORA	cg04657224	-0.0112208	8	11059038	34710136	34709005	9	TRANS
2516-57	CCL21	SomaScan	KORA	cg15213732	0.0121211	10	860677	34710136	34709005	9	TRANS
2516-57	CCL21	SomaScan	KORA	cg13876222	0.0318945	9	139399348	34710136	34709005	9	TRANS
2516-57	CCL21	SomaScan	KORA	cg07068382	0.00459405	6	36947277	34710136	34709005	9	TRANS
2516-57	CCL21	SomaScan	KORA	cg11349423	-0.00017439	11	133232657	34710136	34709005	9	TRANS
2516-57	CCL21	SomaScan	KORA	cg09126090	-0.0265588	1	1534514	34710136	34709005	9	TRANS
2516-57	CCL21	SomaScan	KORA	cg12156831	0.0126483	19	10713352	34710136	34709005	9	TRANS
2516-57	CCL21	SomaScan	KORA	cg07077900	0.00220571	3	53916135	34710136	34709005	9	TRANS
2516-57	CCL21	SomaScan	KORA	cg05337258	-0.00967784	11	61106920	34710136	34709005	9	TRANS
2516-57	CCL21	SomaScan	KORA	cg00813509	0.0110491	12	124941317	34710136	34709005	9	TRANS
2516-57	CCL21	SomaScan	KORA	cg09529023	0.0222603	16	2097506	34710136	34709005	9	TRANS
2516-57	CCL21	SomaScan	KORA	cg18698690	0.00290701	3	129612569	34710136	34709005	9	TRANS
2516-57	CCL21	SomaScan	KORA	cg22816913	-0.00136293	19	54578294	34710136	34709005	9	TRANS
2516-57	CCL21	SomaScan	KORA	cg13375457	0.00452607	6	33263343	34710136	34709005	9	TRANS
2516-57	CCL21	SomaScan	KORA	cg00760338	0.0039249	3	185826511	34710136	34709005	9	TRANS
2516-57	CCL21	SomaScan	KORA	cg09990440	-0.00122637	6	30710455	34710136	34709005	9	TRANS
2516-57	CCL21	SomaScan	KORA	cg23791442	-0.00155533	22	43010704	34710136	34709005	9	TRANS
2516-57	CCL21	SomaScan	KORA	cg07545636	0.00282078	2	10262820	34710136	34709005	9	TRANS
2516-57	CCL21	SomaScan	KORA	cg15048078	0.00308996	4	38665599	34710136	34709005	9	TRANS
2516-57	CCL21	SomaScan	KORA	cg20783319	-0.00606463	11	112831681	34710136	34709005	9	TRANS
2516-57	CCL21	SomaScan	KORA	cg25349939	0.0148701	2	144855085	34710136	34709005	9	TRANS
2516-57	CCL21	SomaScan	KORA	cg03613353	-0.00376912	19	7695641	34710136	34709005	9	TRANS
2516-57	CCL21	SomaScan	KORA	cg22960135	-0.010151	19	41082622	34710136	34709005	9	TRANS
2516-57	CCL21	SomaScan	KORA	cg11092486	-0.0142084	6	5087604	34710136	34709005	9	TRANS
2516-57	CCL21	SomaScan	KORA	cg00321709	-0.0137127	10	135341933	34710136	34709005	9	TRANS
2516-57	CCL21	SomaScan	KORA	cg15175162	-0.00309134	4	15657657	34710136	34709005	9	TRANS
2516-57	CCL21	SomaScan	KORA	cg03526224	-0.0162872	19	57989117	34710136	34709005	9	TRANS
2516-57	CCL21	SomaScan	KORA	cg03687700	-0.0054986	2	24271844	34710136	34709005	9	TRANS
2516-57	CCL21	SomaScan	KORA	cg11722581	0.00866275	10	695853	34710136	34709005	9	TRANS
2516-57	CCL21	SomaScan	KORA	cg25227364	-0.00643723	19	49217490	34710136	34709005	9	TRANS
2516-57	CCL21	SomaScan	KORA	cg14812474	-0.00495017	4	7632386	34710136	34709005	9	TRANS
2516-57	CCL21	SomaScan	KORA	cg26702039	0.00655152	16	66170991	34710136	34709005	9	TRANS
2516-57	CCL21	SomaScan	KORA	cg19250113	0.0138756	17	29298832	34710136	34709005	9	TRANS
2516-57	CCL21	SomaScan	KORA	cg24163263	0.000997359	13	107335632	34710136	34709005	9	TRANS
2516-57	CCL21	SomaScan	KORA	cg08750807	-0.0203551	16	70286329	34710136	34709005	9	TRANS
2516-57	CCL21	SomaScan	KORA	cg19824710	-0.0134542	1	43995379	34710136	34709005	9	TRANS
2516-57	CCL21	SomaScan	KORA	cg14616345	0.0119788	9	133901267	34710136	34709005	9	TRANS
2516-57	CCL21	SomaScan	KORA	cg12019475	-0.011212	6	45700739	34710136	34709005	9	TRANS
2516-57	CCL21	SomaScan	KORA	cg11643285	-0.0329925	3	16411667	34710136	34709005	9	TRANS
2516-57	CCL21	SomaScan	KORA	cg06038777	-0.00416393	8	26371800	34710136	34709005	9	TRANS
2516-57	CCL21	SomaScan	KORA	cg01247836	-0.0165559	17	36722136	34710136	34709005	9	TRANS
2516-57	CCL21	SomaScan	KORA	cg01616489	-0.070085	12	133249980	34710136	34709005	9	TRANS
2516-57	CCL21	SomaScan	KORA	cg01881899	0.000387101	21	43652704	34710136	34709005	9	TRANS
2516-57	CCL21	SomaScan	KORA	cg00415057	-0.0039551	16	68333694	34710136	34709005	9	TRANS
2516-57	CCL21	SomaScan	KORA	cg07926895	-0.0136744	1	200005833	34710136	34709005	9	TRANS
2516-57	CCL21	SomaScan	KORA	cg21163415	-0.000908222	20	57876201	34710136	34709005	9	TRANS
2516-57	CCL21	SomaScan	KORA	cg24275356	0.00669216	6	32942541	34710136	34709005	9	TRANS
2516-57	CCL21	SomaScan	KORA	cg22056870	0.0176944	19	5784688	34710136	34709005	9	TRANS
2516-57	CCL21	SomaScan	KORA	cg12780322	-0.00370374	4	57334163	34710136	34709005	9	TRANS
2516-57	CCL21	SomaScan	KORA	cg08506874	-0.00200875	19	459731	34710136	34709005	9	TRANS
2516-57	CCL21	SomaScan	KORA	cg15501552	-0.0152032	19	47153327	34710136	34709005	9	TRANS
2516-57	CCL21	SomaScan	KORA	cg06690548	-0.0531864	4	139162808	34710136	34709005	9	TRANS
2516-57	CCL21	SomaScan	KORA	cg07830750	-0.00376076	16	854640	34710136	34709005	9	TRANS
2516-57	CCL21	SomaScan	KORA	cg21775675	-0.00605972	5	87441487	34710136	34709005	9	TRANS
2516-57	CCL21	SomaScan	KORA	cg20479870	-0.000578791	15	99192677	34710136	34709005	9	TRANS
2516-57	CCL21	SomaScan	KORA	cg03618918	0.00220672	1	160865097	34710136	34709005	9	TRANS
2516-57	CCL21	SomaScan	KORA	cg04802386	0.00333973	4	103998345	34710136	34709005	9	TRANS
2516-57	CCL21	SomaScan	KORA	cg06538684	0.00289151	12	12511223	34710136	34709005	9	TRANS
2516-57	CCL21	SomaScan	KORA	cg25969108	-0.00386209	19	35605636	34710136	34709005	9	TRANS
2516-57	CCL21	SomaScan	KORA	cg01661567	0.00773256	4	1843351	34710136	34709005	9	TRANS
2516-57	CCL21	SomaScan	KORA	cg13495369	-0.000861719	2	223160569	34710136	34709005	9	TRANS
2516-57	CCL21	SomaScan	KORA	cg09739536	-0.0131332	5	178339445	34710136	34709005	9	TRANS
2516-57	CCL21	SomaScan	KORA	cg11024682	0.0108514	17	17730094	34710136	34709005	9	TRANS
2516-57	CCL21	SomaScan	KORA	cg17681818	-0.00522145	16	70835134	34710136	34709005	9	TRANS
2516-57	CCL21	SomaScan	KORA	cg10802936	-0.00777877	10	43599476	34710136	34709005	9	TRANS
2516-57	CCL21	SomaScan	KORA	cg17169998	0.00743579	22	50524124	34710136	34709005	9	TRANS
2516-57	CCL21	SomaScan	KORA	cg21964662	-0.00471907	13	79234715	34710136	34709005	9	TRANS
2516-57	CCL21	SomaScan	KORA	cg04887675	0.00423977	13	110956761	34710136	34709005	9	TRANS
2516-57	CCL21	SomaScan	KORA	cg14687145	0.00726349	2	29234537	34710136	34709005	9	TRANS
2516-57	CCL21	SomaScan	KORA	cg04788926	0.0195275	18	76617198	34710136	34709005	9	TRANS
2516-57	CCL21	SomaScan	KORA	cg27214652	0.0138761	14	64009971	34710136	34709005	9	TRANS
2516-57	CCL21	SomaScan	KORA	cg12012524	-0.00404502	19	1268008	34710136	34709005	9	TRANS
2516-57	CCL21	SomaScan	KORA	cg24079790	0.0164925	11	107993467	34710136	34709005	9	TRANS
2516-57	CCL21	SomaScan	KORA	cg02068690	0.0161259	2	25600451	34710136	34709005	9	TRANS
2516-57	CCL21	SomaScan	KORA	cg03448754	0.00306914	10	77542302	34710136	34709005	9	TRANS
2516-57	CCL21	SomaScan	KORA	cg08519643	0.000302388	4	84030854	34710136	34709005	9	TRANS
2516-57	CCL21	SomaScan	KORA	cg21461082	0.00183287	21	48081619	34710136	34709005	9	TRANS
2516-57	CCL21	SomaScan	KORA	cg08252804	-0.0117681	2	202788592	34710136	34709005	9	TRANS
2516-57	CCL21	SomaScan	KORA	cg09686672	0.00665107	12	57589253	34710136	34709005	9	TRANS
2516-57	CCL21	SomaScan	KORA	cg10988359	-0.0107836	8	140042087	34710136	34709005	9	TRANS
2579-17	MMP9	SomaScan	KORA	cg06911873	-0.023264	19	37342585	46008908	46016561	20	TRANS
2579-17	MMP9	SomaScan	KORA	cg22960869	0.00488628	17	47287521	46008908	46016561	20	TRANS
2579-17	MMP9	SomaScan	KORA	cg26275825	-0.00100061	10	135008417	46008908	46016561	20	TRANS
2579-17	MMP9	SomaScan	KORA	cg05575921	-0.135781	5	373378	46008908	46016561	20	TRANS
2579-17	MMP9	SomaScan	KORA	cg23404573	0.00710517	19	7991114	46008908	46016561	20	TRANS
2579-17	MMP9	SomaScan	KORA	cg09214398	-0.00653358	15	78556534	46008908	46016561	20	TRANS
2579-17	MMP9	SomaScan	KORA	cg18264657	0.000633331	18	4455862	46008908	46016561	20	TRANS
2579-17	MMP9	SomaScan	KORA	cg25572477	0.0101916	3	171757506	46008908	46016561	20	TRANS
2579-17	MMP9	SomaScan	KORA	cg18155888	0.00312529	1	2266591	46008908	46016561	20	TRANS
2579-17	MMP9	SomaScan	KORA	cg11880727	-0.000996089	14	63512265	46008908	46016561	20	TRANS
2579-17	MMP9	SomaScan	KORA	cg14661803	0.0236857	2	207958145	46008908	46016561	20	TRANS
2579-17	MMP9	SomaScan	KORA	cg04744134	0.0220046	19	8408128	46008908	46016561	20	TRANS
2579-17	MMP9	SomaScan	KORA	cg11589287	-0.0091411	8	1905343	46008908	46016561	20	TRANS
2579-17	MMP9	SomaScan	KORA	cg25063864	-0.000940964	18	77489374	46008908	46016561	20	TRANS
2579-17	MMP9	SomaScan	KORA	cg26494929	-0.000997415	16	3017495	46008908	46016561	20	TRANS
2579-17	MMP9	SomaScan	KORA	cg21655280	0.00260834	3	13521164	46008908	46016561	20	TRANS
2579-17	MMP9	SomaScan	KORA	cg01977863	-0.00636915	17	79167836	46008908	46016561	20	TRANS
2579-17	MMP9	SomaScan	KORA	cg12339424	0.00236998	2	32288911	46008908	46016561	20	TRANS
2579-17	MMP9	SomaScan	KORA	cg08543966	0.00442344	19	35646150	46008908	46016561	20	TRANS
2579-17	MMP9	SomaScan	KORA	cg13939431	0.0107351	1	37980360	46008908	46016561	20	TRANS
2579-17	MMP9	SomaScan	KORA	cg05796331	-0.0019905	10	133768294	46008908	46016561	20	TRANS
2579-17	MMP9	SomaScan	KORA	cg09793807	0.0071379	17	46125678	46008908	46016561	20	TRANS
2579-17	MMP9	SomaScan	KORA	cg16655837	0.00471676	10	32636197	46008908	46016561	20	TRANS
2579-17	MMP9	SomaScan	KORA	cg06567525	0.000880001	20	13201551	46008908	46016561	20	TRANS
2579-17	MMP9	SomaScan	KORA	cg24731241	0.000691102	20	2276663	46008908	46016561	20	TRANS
2579-17	MMP9	SomaScan	KORA	cg14246204	0.0271037	20	33735151	46008908	46016561	20	TRANS
2579-17	MMP9	SomaScan	KORA	cg09364988	-0.0175753	2	68971510	46008908	46016561	20	TRANS
2579-17	MMP9	SomaScan	KORA	cg03888365	-0.00150916	8	123792680	46008908	46016561	20	TRANS
2579-17	MMP9	SomaScan	KORA	cg03286535	-0.000177444	15	90649835	46008908	46016561	20	TRANS
2579-17	MMP9	SomaScan	KORA	cg25458871	-0.00603826	19	57352584	46008908	46016561	20	TRANS
2579-17	MMP9	SomaScan	KORA	cg00882611	-0.0056963	14	21689119	46008908	46016561	20	TRANS
2579-17	MMP9	SomaScan	KORA	cg11441148	-0.00169533	15	65824328	46008908	46016561	20	TRANS
2579-17	MMP9	SomaScan	KORA	cg00834923	0.0175828	16	85393998	46008908	46016561	20	TRANS
2579-17	MMP9	SomaScan	KORA	cg14778264	-0.00621356	8	2179411	46008908	46016561	20	TRANS
2579-17	MMP9	SomaScan	KORA	cg17254383	-0.0285227	17	53363128	46008908	46016561	20	TRANS
2579-17	MMP9	SomaScan	KORA	cg17098449	-0.000882133	22	31364349	46008908	46016561	20	TRANS
2579-17	MMP9	SomaScan	KORA	cg25940557	0.0022021	1	158575177	46008908	46016561	20	TRANS
2579-17	MMP9	SomaScan	KORA	cg27606607	0.0021744	3	183963511	46008908	46016561	20	TRANS
2579-17	MMP9	SomaScan	KORA	cg25462896	0.00694613	11	119031003	46008908	46016561	20	TRANS
2579-17	MMP9	SomaScan	KORA	cg20572153	0.0157601	17	9929755	46008908	46016561	20	TRANS
2579-17	MMP9	SomaScan	KORA	cg13824385	-0.00718952	9	132584750	46008908	46016561	20	TRANS
2579-17	MMP9	SomaScan	KORA	cg18118795	0.00243364	1	33117735	46008908	46016561	20	TRANS
2579-17	MMP9	SomaScan	KORA	cg05332152	-0.00249713	1	213123025	46008908	46016561	20	TRANS
2579-17	MMP9	SomaScan	KORA	cg03880323	0.0125523	15	31507807	46008908	46016561	20	TRANS
2579-17	MMP9	SomaScan	KORA	cg08530237	-0.00344511	12	22094563	46008908	46016561	20	TRANS
2579-17	MMP9	SomaScan	KORA	cg16204414	-0.0024328	3	10325494	46008908	46016561	20	TRANS
2579-17	MMP9	SomaScan	KORA	cg22660120	-0.0144051	6	33424102	46008908	46016561	20	TRANS
2579-17	MMP9	SomaScan	KORA	cg15035973	-0.0121142	2	208485495	46008908	46016561	20	TRANS
2579-17	MMP9	SomaScan	KORA	cg18133477	-0.00231289	20	33293445	46008908	46016561	20	TRANS
2579-17	MMP9	SomaScan	KORA	cg26824709	-0.00738452	5	159740383	46008908	46016561	20	TRANS
2579-17	MMP9	SomaScan	KORA	cg03323598	0.00864121	5	1292446	46008908	46016561	20	TRANS
2579-17	MMP9	SomaScan	KORA	cg21337717	0.00529066	12	117308650	46008908	46016561	20	TRANS
2579-17	MMP9	SomaScan	KORA	cg00042837	-0.0133904	17	37028650	46008908	46016561	20	TRANS
2579-17	MMP9	SomaScan	KORA	cg00720829	0.00344616	6	30131219	46008908	46016561	20	TRANS
2579-17	MMP9	SomaScan	KORA	cg18260374	-0.000171134	2	6633591	46008908	46016561	20	TRANS
2579-17	MMP9	SomaScan	KORA	cg26294955	-0.00069068	5	152502171	46008908	46016561	20	TRANS
2579-17	MMP9	SomaScan	KORA	cg06240124	-0.00188792	16	23690079	46008908	46016561	20	TRANS
2579-17	MMP9	SomaScan	KORA	cg06021750	-0.00378417	12	47022795	46008908	46016561	20	TRANS
2579-17	MMP9	SomaScan	KORA	cg18397975	-0.0223334	5	33997484	46008908	46016561	20	TRANS
2579-17	MMP9	SomaScan	KORA	cg07048504	0.00930101	1	55829278	46008908	46016561	20	TRANS
2579-17	MMP9	SomaScan	KORA	cg20732304	-0.00368165	13	113752657	46008908	46016561	20	TRANS
2579-17	MMP9	SomaScan	KORA	cg09737685	-0.00132326	17	22052189	46008908	46016561	20	TRANS
2579-17	MMP9	SomaScan	KORA	cg25379156	-0.00212522	8	47348070	46008908	46016561	20	TRANS
2579-17	MMP9	SomaScan	KORA	cg25645272	-0.00427369	5	14387224	46008908	46016561	20	TRANS
2579-17	MMP9	SomaScan	KORA	cg00474031	-0.000223684	8	133494101	46008908	46016561	20	TRANS
2579-17	MMP9	SomaScan	KORA	cg10917153	-0.00727082	15	42448786	46008908	46016561	20	TRANS
2579-17	MMP9	SomaScan	KORA	cg18524540	0.00853092	22	19466782	46008908	46016561	20	TRANS
2579-17	MMP9	SomaScan	KORA	cg15934248	0.00829673	2	86332749	46008908	46016561	20	TRANS
2579-17	MMP9	SomaScan	KORA	cg18270378	0.00198103	7	3284394	46008908	46016561	20	TRANS
2579-17	MMP9	SomaScan	KORA	cg00819141	0.00490144	7	1657422	46008908	46016561	20	TRANS
2579-17	MMP9	SomaScan	KORA	cg19235893	0.010151	2	105493611	46008908	46016561	20	TRANS
2579-17	MMP9	SomaScan	KORA	cg21526209	-0.0432507	14	106692023	46008908	46016561	20	TRANS
2579-17	MMP9	SomaScan	KORA	cg27028202	-0.00467735	6	166100316	46008908	46016561	20	TRANS
2579-17	MMP9	SomaScan	KORA	cg23039807	-0.0155184	2	240425897	46008908	46016561	20	TRANS
2579-17	MMP9	SomaScan	KORA	cg13051302	-0.00903659	15	37384042	46008908	46016561	20	TRANS
2579-17	MMP9	SomaScan	KORA	cg13571852	-0.0084844	2	97652491	46008908	46016561	20	TRANS
2579-17	MMP9	SomaScan	KORA	cg17655451	0.0116542	5	53959665	46008908	46016561	20	TRANS
2579-17	MMP9	SomaScan	KORA	cg25264630	0.00440299	7	157849744	46008908	46016561	20	TRANS
2579-17	MMP9	SomaScan	KORA	cg13031537	-0.00868954	3	186920348	46008908	46016561	20	TRANS
2579-17	MMP9	SomaScan	KORA	cg14669514	-0.00207399	13	22243722	46008908	46016561	20	TRANS
2579-17	MMP9	SomaScan	KORA	cg21426759	-0.0059771	6	30303126	46008908	46016561	20	TRANS
2579-17	MMP9	SomaScan	KORA	cg07262395	0.00220977	10	111966094	46008908	46016561	20	TRANS
2579-17	MMP9	SomaScan	KORA	cg00103778	0.00697043	20	30196041	46008908	46016561	20	TRANS
2579-17	MMP9	SomaScan	KORA	cg17963461	9.078e-05	5	3844117	46008908	46016561	20	TRANS
2579-17	MMP9	SomaScan	KORA	cg01539064	0.00999854	19	49122509	46008908	46016561	20	TRANS
2579-17	MMP9	SomaScan	KORA	cg06674932	-0.00400059	11	110299342	46008908	46016561	20	TRANS
2579-17	MMP9	SomaScan	KORA	cg21611682	-0.00547981	11	68138269	46008908	46016561	20	TRANS
2579-17	MMP9	SomaScan	KORA	cg08840010	-0.00207447	1	8000314	46008908	46016561	20	TRANS
2579-17	MMP9	SomaScan	KORA	cg08864944	-0.00881935	1	164633485	46008908	46016561	20	TRANS
2579-17	MMP9	SomaScan	KORA	cg15736783	0.0151501	6	80178612	46008908	46016561	20	TRANS
2579-17	MMP9	SomaScan	KORA	cg22324029	-0.00116321	6	32908466	46008908	46016561	20	TRANS
2579-17	MMP9	SomaScan	KORA	cg19364351	0.0104464	11	6291879	46008908	46016561	20	TRANS
2579-17	MMP9	SomaScan	KORA	cg25985504	0.00282698	15	96303955	46008908	46016561	20	TRANS
2579-17	MMP9	SomaScan	KORA	cg18318715	-0.00541803	1	181068076	46008908	46016561	20	TRANS
2579-17	MMP9	SomaScan	KORA	cg18346531	0.0195216	17	9967431	46008908	46016561	20	TRANS
2579-17	MMP9	SomaScan	KORA	cg20912517	0.00310841	6	29760909	46008908	46016561	20	TRANS
2580-83	MPO	SomaScan	KORA	cg11010909	0.0105636	12	103980767	58280935	58269855	17	TRANS
2580-83	MPO	SomaScan	KORA	cg01829024	-0.00778108	4	83482926	58280935	58269855	17	TRANS
2580-83	MPO	SomaScan	KORA	cg25447872	0.00934609	13	113492708	58280935	58269855	17	TRANS
2580-83	MPO	SomaScan	KORA	cg16152482	0.00308447	20	57607440	58280935	58269855	17	TRANS
2580-83	MPO	SomaScan	KORA	cg24457521	0.00370938	20	57607420	58280935	58269855	17	TRANS
2580-83	MPO	SomaScan	KORA	cg14784944	0.00391152	7	4855785	58280935	58269855	17	TRANS
2580-83	MPO	SomaScan	KORA	cg14898177	0.00213807	12	2486634	58280935	58269855	17	TRANS
2580-83	MPO	SomaScan	KORA	cg06866597	-0.00606781	22	29279129	58280935	58269855	17	TRANS
2580-83	MPO	SomaScan	KORA	cg05082708	-0.0142159	4	4765299	58280935	58269855	17	TRANS
2580-83	MPO	SomaScan	KORA	cg16520357	-0.00865031	13	53625240	58280935	58269855	17	TRANS
2580-83	MPO	SomaScan	KORA	cg01912040	-0.00145574	17	1106553	58280935	58269855	17	TRANS
2580-83	MPO	SomaScan	KORA	cg04202736	-0.00850027	15	42371721	58280935	58269855	17	TRANS
2580-83	MPO	SomaScan	KORA	cg20777437	-0.00113313	1	54619703	58280935	58269855	17	TRANS
2580-83	MPO	SomaScan	KORA	cg19251719	0.00199534	1	203055479	58280935	58269855	17	TRANS
2580-83	MPO	SomaScan	KORA	cg11020853	-0.0237453	3	43020564	58280935	58269855	17	TRANS
2580-83	MPO	SomaScan	KORA	cg09443484	0.0021039	11	33673943	58280935	58269855	17	TRANS
2580-83	MPO	SomaScan	KORA	cg14086364	-0.00470233	5	150678334	58280935	58269855	17	TRANS
2580-83	MPO	SomaScan	KORA	cg07414492	0.00797446	20	3656411	58280935	58269855	17	TRANS
2580-83	MPO	SomaScan	KORA	cg07726287	-0.00199484	16	84318109	58280935	58269855	17	TRANS
2580-83	MPO	SomaScan	KORA	cg20113993	-0.0114501	6	34394080	58280935	58269855	17	TRANS
2580-83	MPO	SomaScan	KORA	cg05529249	0.00224683	2	24272480	58280935	58269855	17	TRANS
2580-83	MPO	SomaScan	KORA	cg03539511	0.0204744	20	57607061	58280935	58269855	17	TRANS
2580-83	MPO	SomaScan	KORA	cg12622242	0.00204615	8	19203257	58280935	58269855	17	TRANS
2580-83	MPO	SomaScan	KORA	cg06387622	-0.0124253	6	1100823	58280935	58269855	17	TRANS
2580-83	MPO	SomaScan	KORA	cg19779057	0.000360442	1	204073369	58280935	58269855	17	TRANS
2580-83	MPO	SomaScan	KORA	cg00288844	-0.0409453	16	11835360	58280935	58269855	17	TRANS
2580-83	MPO	SomaScan	KORA	cg10759293	-0.00783492	20	19999226	58280935	58269855	17	TRANS
2580-83	MPO	SomaScan	KORA	cg10159032	-0.000231425	17	30347989	58280935	58269855	17	TRANS
2580-83	MPO	SomaScan	KORA	cg15390444	-0.0124004	10	133793442	58280935	58269855	17	TRANS
2580-83	MPO	SomaScan	KORA	cg02304156	0.00298353	16	28913517	58280935	58269855	17	TRANS
2580-83	MPO	SomaScan	KORA	cg21121843	0.0230056	4	3203982	58280935	58269855	17	TRANS
2580-83	MPO	SomaScan	KORA	cg26176348	0.00232455	2	9372432	58280935	58269855	17	TRANS
2580-83	MPO	SomaScan	KORA	cg20355735	0.000851287	7	4118868	58280935	58269855	17	TRANS
2580-83	MPO	SomaScan	KORA	cg00920892	0.0240664	8	37732224	58280935	58269855	17	TRANS
2580-83	MPO	SomaScan	KORA	cg10690747	0.0264056	21	43823835	58280935	58269855	17	TRANS
2658-27	NTRK3	SomaScan	KORA	cg27113548	0.00533279	14	106354912	88256768	87859751	15	TRANS
2658-27	NTRK3	SomaScan	KORA	cg00046913	-0.0072825	16	1877150	88256768	87859751	15	TRANS
2658-27	NTRK3	SomaScan	KORA	cg16271912	0.00050366	5	68665562	88256768	87859751	15	TRANS
2658-27	NTRK3	SomaScan	KORA	cg26559804	0.00945442	11	128391271	88256768	87859751	15	TRANS
2658-27	NTRK3	SomaScan	KORA	cg17600863	0.00188486	10	93372507	88256768	87859751	15	TRANS
2658-27	NTRK3	SomaScan	KORA	cg26516004	0.00702176	15	75019376	88256768	87859751	15	TRANS
2658-27	NTRK3	SomaScan	KORA	cg09253914	0.00409202	2	37311580	88256768	87859751	15	TRANS
2658-27	NTRK3	SomaScan	KORA	cg05575921	0.041869	5	373378	88256768	87859751	15	TRANS
2658-27	NTRK3	SomaScan	KORA	cg19149898	0.00338347	6	116421874	88256768	87859751	15	TRANS
2658-27	NTRK3	SomaScan	KORA	cg23690369	-0.00912616	10	95462349	88256768	87859751	15	TRANS
2658-27	NTRK3	SomaScan	KORA	cg05536998	0.0064207	18	46500646	88256768	87859751	15	TRANS
2658-27	NTRK3	SomaScan	KORA	cg03588039	0.00175218	8	99182441	88256768	87859751	15	TRANS
2658-27	NTRK3	SomaScan	KORA	cg12980917	-0.00760823	19	38715106	88256768	87859751	15	TRANS
2658-27	NTRK3	SomaScan	KORA	cg16652531	0.00487691	4	189602185	88256768	87859751	15	TRANS
2658-27	NTRK3	SomaScan	KORA	cg16815379	-0.0110604	1	165797173	88256768	87859751	15	TRANS
2658-27	NTRK3	SomaScan	KORA	cg01736243	-0.00567686	17	3289510	88256768	87859751	15	TRANS
2658-27	NTRK3	SomaScan	KORA	cg10524192	-0.0122953	9	34637478	88256768	87859751	15	TRANS
2658-27	NTRK3	SomaScan	KORA	cg25942789	0.00937262	2	241696788	88256768	87859751	15	TRANS
2658-27	NTRK3	SomaScan	KORA	cg03582827	0.0111329	16	958339	88256768	87859751	15	TRANS
2658-27	NTRK3	SomaScan	KORA	cg26922444	-0.00068177	6	24911204	88256768	87859751	15	TRANS
2658-27	NTRK3	SomaScan	KORA	cg22140261	-0.0146411	22	42466895	88256768	87859751	15	TRANS
2658-27	NTRK3	SomaScan	KORA	cg02063203	-0.000271388	2	220252733	88256768	87859751	15	TRANS
2658-27	NTRK3	SomaScan	KORA	cg24842967	0.00176971	1	156084750	88256768	87859751	15	TRANS
2658-27	NTRK3	SomaScan	KORA	cg17097782	0.00123146	2	19551860	88256768	87859751	15	TRANS
2658-27	NTRK3	SomaScan	KORA	cg13832045	-0.00608089	9	139923087	88256768	87859751	15	TRANS
2658-27	NTRK3	SomaScan	KORA	cg02570977	0.00325731	8	144373277	88256768	87859751	15	TRANS
2658-27	NTRK3	SomaScan	KORA	cg03069282	-0.00396581	17	37753772	88256768	87859751	15	TRANS
2658-27	NTRK3	SomaScan	KORA	cg04717895	0.0056724	16	31541298	88256768	87859751	15	TRANS
2658-27	NTRK3	SomaScan	KORA	cg20217649	0.0210863	8	67835351	88256768	87859751	15	TRANS
2658-27	NTRK3	SomaScan	KORA	cg09162056	-0.0029338	4	174255944	88256768	87859751	15	TRANS
2658-27	NTRK3	SomaScan	KORA	cg18809039	-0.00747814	5	2702863	88256768	87859751	15	TRANS
2658-27	NTRK3	SomaScan	KORA	cg05933116	-0.00900337	17	76950803	88256768	87859751	15	TRANS
2658-27	NTRK3	SomaScan	KORA	cg21566642	0.0353899	2	233284661	88256768	87859751	15	TRANS
2658-27	NTRK3	SomaScan	KORA	cg06088188	-0.000449734	17	80251443	88256768	87859751	15	TRANS
2658-27	NTRK3	SomaScan	KORA	cg19542630	-0.013083	4	8442666	88256768	87859751	15	TRANS
2658-27	NTRK3	SomaScan	KORA	cg00393546	0.0165617	10	461919	88256768	87859751	15	TRANS
2658-27	NTRK3	SomaScan	KORA	cg21913519	-0.0180856	7	209058	88256768	87859751	15	TRANS
2658-27	NTRK3	SomaScan	KORA	cg02590038	-0.0020598	10	99258829	88256768	87859751	15	TRANS
2658-27	NTRK3	SomaScan	KORA	cg22511877	-0.000725752	2	1942942	88256768	87859751	15	TRANS
2658-27	NTRK3	SomaScan	KORA	cg08685733	0.0115468	17	42215609	88256768	87859751	15	TRANS
2658-27	NTRK3	SomaScan	KORA	cg16419620	-0.00555633	12	48214187	88256768	87859751	15	TRANS
2658-27	NTRK3	SomaScan	KORA	cg11138929	-0.0136249	3	113251189	88256768	87859751	15	TRANS
2658-27	NTRK3	SomaScan	KORA	cg14196756	-0.00721749	6	158588763	88256768	87859751	15	TRANS
2658-27	NTRK3	SomaScan	KORA	cg16210973	-0.0111988	5	147760896	88256768	87859751	15	TRANS
2658-27	NTRK3	SomaScan	KORA	cg04473095	-0.00393776	10	50885235	88256768	87859751	15	TRANS
2658-27	NTRK3	SomaScan	KORA	cg26708781	0.0184778	4	87921477	88256768	87859751	15	TRANS
2658-27	NTRK3	SomaScan	KORA	cg09510246	0.00665952	6	1684515	88256768	87859751	15	TRANS
2658-27	NTRK3	SomaScan	KORA	cg03450842	0.00589275	10	80834947	88256768	87859751	15	TRANS
2658-27	NTRK3	SomaScan	KORA	cg24861859	0.00100846	1	175474533	88256768	87859751	15	TRANS
2658-27	NTRK3	SomaScan	KORA	cg25727569	0.000625519	3	53845287	88256768	87859751	15	TRANS
2658-27	NTRK3	SomaScan	KORA	cg19122206	0.00964835	22	48972927	88256768	87859751	15	TRANS
2658-27	NTRK3	SomaScan	KORA	cg13074055	0.00660648	14	106329206	88256768	87859751	15	TRANS
2658-27	NTRK3	SomaScan	KORA	cg17501210	5.97697e-05	6	166970252	88256768	87859751	15	TRANS
2658-27	NTRK3	SomaScan	KORA	cg06857921	0.00692297	2	217530276	88256768	87859751	15	TRANS
2658-27	NTRK3	SomaScan	KORA	cg26283371	-0.0108199	4	146019093	88256768	87859751	15	TRANS
2658-27	NTRK3	SomaScan	KORA	cg09876440	0.00621171	3	10325981	88256768	87859751	15	TRANS
2658-27	NTRK3	SomaScan	KORA	cg10555744	-0.00327703	1	25946258	88256768	87859751	15	TRANS
2658-27	NTRK3	SomaScan	KORA	cg22521263	0.0103353	4	6729744	88256768	87859751	15	TRANS
2658-27	NTRK3	SomaScan	KORA	cg14192029	-0.00302747	4	126058	88256768	87859751	15	TRANS
2658-27	NTRK3	SomaScan	KORA	cg21985356	0.0181357	5	76383200	88256768	87859751	15	TRANS
2658-27	NTRK3	SomaScan	KORA	cg11178189	0.00331552	5	137549012	88256768	87859751	15	TRANS
2658-27	NTRK3	SomaScan	KORA	cg26990681	0.00786156	2	47750631	88256768	87859751	15	TRANS
2658-27	NTRK3	SomaScan	KORA	cg06192883	-0.0545343	15	52554171	88256768	87859751	15	TRANS
2658-27	NTRK3	SomaScan	KORA	cg21543270	-0.00071734	14	105840286	88256768	87859751	15	TRANS
2658-27	NTRK3	SomaScan	KORA	cg02904344	0.0185812	6	134498979	88256768	87859751	15	TRANS
2658-27	NTRK3	SomaScan	KORA	cg16043373	0.00127101	17	80762382	88256768	87859751	15	TRANS
2658-27	NTRK3	SomaScan	KORA	cg01422467	0.00783602	4	103998289	88256768	87859751	15	TRANS
2658-27	NTRK3	SomaScan	KORA	cg02930687	0.00165081	21	32253206	88256768	87859751	15	TRANS
2658-27	NTRK3	SomaScan	KORA	cg02474625	0.00196498	11	103197069	88256768	87859751	15	TRANS
2658-27	NTRK3	SomaScan	KORA	cg01320298	0.00155205	3	15160158	88256768	87859751	15	TRANS
2658-27	NTRK3	SomaScan	KORA	cg07023791	0.00676505	10	83633980	88256768	87859751	15	TRANS
2658-27	NTRK3	SomaScan	KORA	cg00681003	0.00073872	20	23586547	88256768	87859751	15	TRANS
2658-27	NTRK3	SomaScan	KORA	cg05540716	-0.00626456	17	27077424	88256768	87859751	15	TRANS
2658-27	NTRK3	SomaScan	KORA	cg18163973	-0.00622599	3	182833979	88256768	87859751	15	TRANS
2658-27	NTRK3	SomaScan	KORA	cg21703988	-0.00936743	12	132549404	88256768	87859751	15	TRANS
2658-27	NTRK3	SomaScan	KORA	cg23376861	-0.011184	18	43678713	88256768	87859751	15	TRANS
2658-27	NTRK3	SomaScan	KORA	cg05148385	-0.00109032	2	213950646	88256768	87859751	15	TRANS
2658-27	NTRK3	SomaScan	KORA	cg02535223	0.014119	16	77952576	88256768	87859751	15	TRANS
2658-27	NTRK3	SomaScan	KORA	cg20695142	0.024977	5	1727797	88256768	87859751	15	TRANS
2658-27	NTRK3	SomaScan	KORA	cg23741583	0.00664229	6	39906844	88256768	87859751	15	TRANS
2658-27	NTRK3	SomaScan	KORA	cg18281439	-0.0152491	10	134662025	88256768	87859751	15	TRANS
2658-27	NTRK3	SomaScan	KORA	cg01703205	0.0179494	7	142422236	88256768	87859751	15	TRANS
2658-27	NTRK3	SomaScan	KORA	cg03725309	0.0336475	1	109757585	88256768	87859751	15	TRANS
2658-27	NTRK3	SomaScan	KORA	cg11944797	0.0013804	13	99135711	88256768	87859751	15	TRANS
2658-27	NTRK3	SomaScan	KORA	cg12806681	0.0204998	5	368394	88256768	87859751	15	TRANS
2658-27	NTRK3	SomaScan	KORA	cg16339286	-0.0246809	7	4012484	88256768	87859751	15	TRANS
2658-27	NTRK3	SomaScan	KORA	cg02117713	-0.00430575	16	1499445	88256768	87859751	15	TRANS
2658-27	NTRK3	SomaScan	KORA	cg24054774	0.00566648	12	19750334	88256768	87859751	15	TRANS
2658-27	NTRK3	SomaScan	KORA	cg22716127	0.00433367	6	71377855	88256768	87859751	15	TRANS
2658-27	NTRK3	SomaScan	KORA	cg14145338	-0.00828158	9	139649039	88256768	87859751	15	TRANS
2658-27	NTRK3	SomaScan	KORA	cg13206302	0.00205157	5	138739960	88256768	87859751	15	TRANS
2658-27	NTRK3	SomaScan	KORA	cg04738279	-0.00138708	17	46696432	88256768	87859751	15	TRANS
2658-27	NTRK3	SomaScan	KORA	cg05050884	0.00207155	3	186567346	88256768	87859751	15	TRANS
2658-27	NTRK3	SomaScan	KORA	cg09825082	0.00754565	2	2567907	88256768	87859751	15	TRANS
2658-27	NTRK3	SomaScan	KORA	cg01440105	-1.56555e-05	17	15587124	88256768	87859751	15	TRANS
2658-27	NTRK3	SomaScan	KORA	cg26221243	-0.00211103	8	128747973	88256768	87859751	15	TRANS
2658-27	NTRK3	SomaScan	KORA	cg07326071	0.00211547	7	25766144	88256768	87859751	15	TRANS
2658-27	NTRK3	SomaScan	KORA	cg03747309	-0.0173143	16	3740662	88256768	87859751	15	TRANS
2658-27	NTRK3	SomaScan	KORA	cg06206801	-0.00989551	18	24131379	88256768	87859751	15	TRANS
2658-27	NTRK3	SomaScan	KORA	cg19111459	-0.00142176	10	122708739	88256768	87859751	15	TRANS
2658-27	NTRK3	SomaScan	KORA	cg08658287	-0.0155839	13	112679645	88256768	87859751	15	TRANS
2658-27	NTRK3	SomaScan	KORA	cg17822325	-0.0179968	1	31896462	88256768	87859751	15	TRANS
2658-27	NTRK3	SomaScan	KORA	cg26908825	0.00274338	6	1635818	88256768	87859751	15	TRANS
2658-27	NTRK3	SomaScan	KORA	cg08822075	0.00110744	7	26193607	88256768	87859751	15	TRANS
2658-27	NTRK3	SomaScan	KORA	cg27480539	-0.00164186	19	16770792	88256768	87859751	15	TRANS
2658-27	NTRK3	SomaScan	KORA	cg05487507	0.00264801	17	46671861	88256768	87859751	15	TRANS
2658-27	NTRK3	SomaScan	KORA	cg19254163	0.0346474	11	60623782	88256768	87859751	15	TRANS
2658-27	NTRK3	SomaScan	KORA	cg07190917	-0.0127282	16	31045100	88256768	87859751	15	TRANS
2658-27	NTRK3	SomaScan	KORA	cg00094412	0.0111787	6	29592854	88256768	87859751	15	TRANS
2658-27	NTRK3	SomaScan	KORA	cg10981962	-0.00500441	6	90312516	88256768	87859751	15	TRANS
2658-27	NTRK3	SomaScan	KORA	cg21051423	0.01409	8	121457935	88256768	87859751	15	TRANS
2658-27	NTRK3	SomaScan	KORA	cg24233679	-0.0177072	19	18761792	88256768	87859751	15	TRANS
2658-27	NTRK3	SomaScan	KORA	cg11815984	-0.00171225	6	158921186	88256768	87859751	15	TRANS
2658-27	NTRK3	SomaScan	KORA	cg00688840	0.0167539	14	106363051	88256768	87859751	15	TRANS
2658-27	NTRK3	SomaScan	KORA	cg14476101	0.0140427	1	120255992	88256768	87859751	15	TRANS
2658-27	NTRK3	SomaScan	KORA	cg04579183	0.000552282	15	88119834	88256768	87859751	15	CIS
2658-27	NTRK3	SomaScan	KORA	cg10577241	-0.0100811	15	77456283	88256768	87859751	15	TRANS
2658-27	NTRK3	SomaScan	KORA	cg00920572	-0.000931797	12	54349349	88256768	87859751	15	TRANS
2658-27	NTRK3	SomaScan	KORA	cg20687255	-0.00248807	5	175846914	88256768	87859751	15	TRANS
2658-27	NTRK3	SomaScan	KORA	cg11263852	0.00192835	12	107830064	88256768	87859751	15	TRANS
2658-27	NTRK3	SomaScan	KORA	cg09275783	0.000523475	10	77195235	88256768	87859751	15	TRANS
2658-27	NTRK3	SomaScan	KORA	cg01134643	-0.0101922	10	5406948	88256768	87859751	15	TRANS
2658-27	NTRK3	SomaScan	KORA	cg05834826	-0.0258073	5	178286892	88256768	87859751	15	TRANS
2658-27	NTRK3	SomaScan	KORA	cg10096893	-0.00588295	1	85159003	88256768	87859751	15	TRANS
2658-27	NTRK3	SomaScan	KORA	cg23677291	0.000859149	11	56923527	88256768	87859751	15	TRANS
2658-27	NTRK3	SomaScan	KORA	cg00362322	0.000769154	16	88704230	88256768	87859751	15	TRANS
2658-27	NTRK3	SomaScan	KORA	cg03636183	0.0176868	19	17000585	88256768	87859751	15	TRANS
2658-27	NTRK3	SomaScan	KORA	cg06054589	-0.0168555	6	133138774	88256768	87859751	15	TRANS
2658-27	NTRK3	SomaScan	KORA	cg07130508	0.00628902	10	103875497	88256768	87859751	15	TRANS
2658-27	NTRK3	SomaScan	KORA	cg10967113	-0.000145211	15	93131035	88256768	87859751	15	CIS
2658-27	NTRK3	SomaScan	KORA	cg03418876	-0.00661898	17	48799340	88256768	87859751	15	TRANS
2658-27	NTRK3	SomaScan	KORA	cg21701531	-0.00200884	2	145275199	88256768	87859751	15	TRANS
2658-27	NTRK3	SomaScan	KORA	cg09919392	0.0182878	16	34809677	88256768	87859751	15	TRANS
2658-27	NTRK3	SomaScan	KORA	cg02650017	0.0395816	17	47301614	88256768	87859751	15	TRANS
2658-27	NTRK3	SomaScan	KORA	cg07203362	-0.00395159	2	60636515	88256768	87859751	15	TRANS
2658-27	NTRK3	SomaScan	KORA	cg26312951	0.0325754	21	42797847	88256768	87859751	15	TRANS
2658-27	NTRK3	SomaScan	KORA	cg21367783	0.0141733	7	4775278	88256768	87859751	15	TRANS
2658-27	NTRK3	SomaScan	KORA	cg14583103	0.00224197	19	373432	88256768	87859751	15	TRANS
2658-27	NTRK3	SomaScan	KORA	cg25626427	-0.00883301	2	176976174	88256768	87859751	15	TRANS
2658-27	NTRK3	SomaScan	KORA	cg26811927	-0.000973269	1	22904862	88256768	87859751	15	TRANS
2658-27	NTRK3	SomaScan	KORA	cg08892082	-0.00991261	10	17233252	88256768	87859751	15	TRANS
2658-27	NTRK3	SomaScan	KORA	cg25770698	0.00597498	5	124082630	88256768	87859751	15	TRANS
2658-27	NTRK3	SomaScan	KORA	cg24174996	-0.0183208	11	124295015	88256768	87859751	15	TRANS
2658-27	NTRK3	SomaScan	KORA	cg17279365	-0.000457793	1	217168635	88256768	87859751	15	TRANS
2658-27	NTRK3	SomaScan	KORA	cg07236562	-0.00383988	8	125879270	88256768	87859751	15	TRANS
2658-27	NTRK3	SomaScan	KORA	cg01078197	-0.00137649	2	234777085	88256768	87859751	15	TRANS
2658-27	NTRK3	SomaScan	KORA	cg23705108	0.00125977	4	27102875	88256768	87859751	15	TRANS
2658-27	NTRK3	SomaScan	KORA	cg00729269	-0.0131699	16	72127900	88256768	87859751	15	TRANS
2665-26	TNFRSF17	SomaScan	KORA	cg15775835	0.0162554	21	47878727	11965210	11968068	16	TRANS
2665-26	TNFRSF17	SomaScan	KORA	cg18844382	0.0161481	14	23834977	11965210	11968068	16	TRANS
2665-26	TNFRSF17	SomaScan	KORA	cg06220235	-0.0109271	16	11349023	11965210	11968068	16	CIS
2665-26	TNFRSF17	SomaScan	KORA	cg17339927	0.000595688	12	132991124	11965210	11968068	16	TRANS
2665-26	TNFRSF17	SomaScan	KORA	cg22322863	-0.00534018	17	30814625	11965210	11968068	16	TRANS
2665-26	TNFRSF17	SomaScan	KORA	cg15711268	0.0165392	19	31841952	11965210	11968068	16	TRANS
2665-26	TNFRSF17	SomaScan	KORA	cg26354221	0.00530227	22	24822802	11965210	11968068	16	TRANS
2665-26	TNFRSF17	SomaScan	KORA	cg22135752	0.000223562	5	6583380	11965210	11968068	16	TRANS
2665-26	TNFRSF17	SomaScan	KORA	cg04142017	0.014009	1	53558596	11965210	11968068	16	TRANS
2665-26	TNFRSF17	SomaScan	KORA	cg08622675	-0.0026135	7	6524998	11965210	11968068	16	TRANS
2665-26	TNFRSF17	SomaScan	KORA	cg24983105	-0.00242084	12	51818657	11965210	11968068	16	TRANS
2665-26	TNFRSF17	SomaScan	KORA	cg07027566	-0.0117902	16	1401894	11965210	11968068	16	TRANS
2665-26	TNFRSF17	SomaScan	KORA	cg05346947	-0.00208963	6	31164968	11965210	11968068	16	TRANS
2665-26	TNFRSF17	SomaScan	KORA	cg12529868	-0.00258729	2	61698413	11965210	11968068	16	TRANS
2665-26	TNFRSF17	SomaScan	KORA	cg18647259	0.00608346	17	36610306	11965210	11968068	16	TRANS
2665-26	TNFRSF17	SomaScan	KORA	cg14338887	0.0177342	6	42928500	11965210	11968068	16	TRANS
2665-26	TNFRSF17	SomaScan	KORA	cg22466448	-0.000587514	19	41103168	11965210	11968068	16	TRANS
2665-26	TNFRSF17	SomaScan	KORA	cg22790257	-0.000536926	1	151694108	11965210	11968068	16	TRANS
2665-26	TNFRSF17	SomaScan	KORA	cg08247450	0.00874932	4	171011099	11965210	11968068	16	TRANS
2665-26	TNFRSF17	SomaScan	KORA	cg02808338	-0.011629	18	33077556	11965210	11968068	16	TRANS
2665-26	TNFRSF17	SomaScan	KORA	cg23603528	-0.0149761	11	74204338	11965210	11968068	16	TRANS
2665-26	TNFRSF17	SomaScan	KORA	cg02422426	0.00967618	4	183370059	11965210	11968068	16	TRANS
2665-26	TNFRSF17	SomaScan	KORA	cg13937905	0.00253313	12	53612551	11965210	11968068	16	TRANS
2665-26	TNFRSF17	SomaScan	KORA	cg19980382	-0.0188429	15	89164601	11965210	11968068	16	TRANS
2665-26	TNFRSF17	SomaScan	KORA	cg07329135	-0.00482657	8	121824488	11965210	11968068	16	TRANS
2665-26	TNFRSF17	SomaScan	KORA	cg26989374	-0.00848105	17	33289325	11965210	11968068	16	TRANS
2665-26	TNFRSF17	SomaScan	KORA	cg04025701	0.00127109	5	149829180	11965210	11968068	16	TRANS
2665-26	TNFRSF17	SomaScan	KORA	cg06164712	0.0090821	16	87584709	11965210	11968068	16	TRANS
2665-26	TNFRSF17	SomaScan	KORA	cg22978087	0.000359519	8	24814126	11965210	11968068	16	TRANS
2665-26	TNFRSF17	SomaScan	KORA	cg04525508	0.00883271	3	124774877	11965210	11968068	16	TRANS
2665-26	TNFRSF17	SomaScan	KORA	cg17927777	-0.00565169	20	33865990	11965210	11968068	16	TRANS
2665-26	TNFRSF17	SomaScan	KORA	cg14252519	0.0257581	9	137533851	11965210	11968068	16	TRANS
2665-26	TNFRSF17	SomaScan	KORA	cg24738140	-0.00996627	17	76498535	11965210	11968068	16	TRANS
2665-26	TNFRSF17	SomaScan	KORA	cg13331011	-0.00325334	5	139054289	11965210	11968068	16	TRANS
2665-26	TNFRSF17	SomaScan	KORA	cg19756929	0.0005179	19	7581188	11965210	11968068	16	TRANS
2665-26	TNFRSF17	SomaScan	KORA	cg10540759	-0.0053869	22	19159404	11965210	11968068	16	TRANS
2665-26	TNFRSF17	SomaScan	KORA	cg03356490	-0.0203943	19	35605867	11965210	11968068	16	TRANS
2665-26	TNFRSF17	SomaScan	KORA	cg08740087	-0.0256585	6	155054225	11965210	11968068	16	TRANS
2665-26	TNFRSF17	SomaScan	KORA	cg22348001	-0.0145643	11	64360997	11965210	11968068	16	TRANS
2665-26	TNFRSF17	SomaScan	KORA	cg02951971	0.000519679	14	50698663	11965210	11968068	16	TRANS
2665-26	TNFRSF17	SomaScan	KORA	cg20045492	0.00976783	10	46992909	11965210	11968068	16	TRANS
2665-26	TNFRSF17	SomaScan	KORA	cg14102128	0.00783937	2	110371632	11965210	11968068	16	TRANS
2665-26	TNFRSF17	SomaScan	KORA	cg19809977	-0.0067601	1	36851672	11965210	11968068	16	TRANS
2665-26	TNFRSF17	SomaScan	KORA	cg17124583	0.00524627	10	8097641	11965210	11968068	16	TRANS
2665-26	TNFRSF17	SomaScan	KORA	cg06192497	0.0365462	2	63276216	11965210	11968068	16	TRANS
2665-26	TNFRSF17	SomaScan	KORA	cg16028201	2.19896e-05	1	62784802	11965210	11968068	16	TRANS
2665-26	TNFRSF17	SomaScan	KORA	cg07891064	0.000783464	6	42017495	11965210	11968068	16	TRANS
2665-26	TNFRSF17	SomaScan	KORA	cg21678736	-0.0191649	17	75282776	11965210	11968068	16	TRANS
2665-26	TNFRSF17	SomaScan	KORA	cg08626932	0.00115076	20	62259823	11965210	11968068	16	TRANS
2665-26	TNFRSF17	SomaScan	KORA	cg13319417	0.0172572	6	36304456	11965210	11968068	16	TRANS
2665-26	TNFRSF17	SomaScan	KORA	cg26298599	-0.00591806	13	98154591	11965210	11968068	16	TRANS
2665-26	TNFRSF17	SomaScan	KORA	cg11269166	-0.00643783	2	172203847	11965210	11968068	16	TRANS
2665-26	TNFRSF17	SomaScan	KORA	cg08611508	0.00622782	17	57295577	11965210	11968068	16	TRANS
2665-26	TNFRSF17	SomaScan	KORA	cg10150530	-0.019016	12	25205468	11965210	11968068	16	TRANS
2665-26	TNFRSF17	SomaScan	KORA	cg15444978	-0.0109807	14	103851370	11965210	11968068	16	TRANS
2665-26	TNFRSF17	SomaScan	KORA	cg11324953	-0.00199556	4	3077939	11965210	11968068	16	TRANS
2665-26	TNFRSF17	SomaScan	KORA	cg18224942	-0.0206301	1	1225781	11965210	11968068	16	TRANS
2665-26	TNFRSF17	SomaScan	KORA	cg19389370	0.00547219	11	10161484	11965210	11968068	16	TRANS
2665-26	TNFRSF17	SomaScan	KORA	cg01563502	0.00212506	7	100285047	11965210	11968068	16	TRANS
2665-26	TNFRSF17	SomaScan	KORA	cg15418322	0.00817716	14	37558604	11965210	11968068	16	TRANS
2665-26	TNFRSF17	SomaScan	KORA	cg01616085	0.00493873	5	176851349	11965210	11968068	16	TRANS
2665-26	TNFRSF17	SomaScan	KORA	cg03293765	0.00185713	3	59391280	11965210	11968068	16	TRANS
2665-26	TNFRSF17	SomaScan	KORA	cg25422405	0.000992878	17	3674611	11965210	11968068	16	TRANS
2665-26	TNFRSF17	SomaScan	KORA	cg10533159	-0.0142438	1	207991937	11965210	11968068	16	TRANS
2665-26	TNFRSF17	SomaScan	KORA	cg25998745	-0.00590362	8	142028625	11965210	11968068	16	TRANS
2665-26	TNFRSF17	SomaScan	KORA	cg06554270	0.00438723	16	89962084	11965210	11968068	16	TRANS
2665-26	TNFRSF17	SomaScan	KORA	cg09908110	-0.0349479	11	63828713	11965210	11968068	16	TRANS
2665-26	TNFRSF17	SomaScan	KORA	cg07427772	0.0143456	15	50412376	11965210	11968068	16	TRANS
2665-26	TNFRSF17	SomaScan	KORA	cg15763258	-0.000357659	11	128561675	11965210	11968068	16	TRANS
2665-26	TNFRSF17	SomaScan	KORA	cg02851049	0.00160074	16	101260	11965210	11968068	16	TRANS
2665-26	TNFRSF17	SomaScan	KORA	cg27286957	0.00252354	6	33740409	11965210	11968068	16	TRANS
2665-26	TNFRSF17	SomaScan	KORA	cg16091995	-0.00637808	2	202484320	11965210	11968068	16	TRANS
2665-26	TNFRSF17	SomaScan	KORA	cg26020695	0.0135968	13	46355841	11965210	11968068	16	TRANS
2665-26	TNFRSF17	SomaScan	KORA	cg21981144	-0.00950249	19	45248572	11965210	11968068	16	TRANS
2665-26	TNFRSF17	SomaScan	KORA	cg03585734	7.13067e-05	1	15598865	11965210	11968068	16	TRANS
2665-26	TNFRSF17	SomaScan	KORA	cg21692182	0.00300759	1	94483746	11965210	11968068	16	TRANS
2665-26	TNFRSF17	SomaScan	KORA	cg05340438	0.00228755	19	54825287	11965210	11968068	16	TRANS
2665-26	TNFRSF17	SomaScan	KORA	cg16205846	-0.0137645	2	211539520	11965210	11968068	16	TRANS
2665-26	TNFRSF17	SomaScan	KORA	cg02783838	-0.000732024	10	11248175	11965210	11968068	16	TRANS
2665-26	TNFRSF17	SomaScan	KORA	cg18722881	-0.00669792	11	22688139	11965210	11968068	16	TRANS
2665-26	TNFRSF17	SomaScan	KORA	cg01839492	0.00764743	11	130431435	11965210	11968068	16	TRANS
2665-26	TNFRSF17	SomaScan	KORA	cg23483512	0.00219413	17	75884327	11965210	11968068	16	TRANS
2665-26	TNFRSF17	SomaScan	KORA	cg16969852	-0.0114581	9	111775933	11965210	11968068	16	TRANS
2665-26	TNFRSF17	SomaScan	KORA	cg14181724	-0.00756466	9	72436057	11965210	11968068	16	TRANS
2665-26	TNFRSF17	SomaScan	KORA	cg02028663	-0.00385832	11	128557589	11965210	11968068	16	TRANS
2665-26	TNFRSF17	SomaScan	KORA	cg05111873	0.00976549	17	48450072	11965210	11968068	16	TRANS
2665-26	TNFRSF17	SomaScan	KORA	cg06270615	-0.0138725	17	40516068	11965210	11968068	16	TRANS
2665-26	TNFRSF17	SomaScan	KORA	cg12749636	0.00918507	1	26126442	11965210	11968068	16	TRANS
2665-26	TNFRSF17	SomaScan	KORA	cg22025132	-0.0121449	6	143771787	11965210	11968068	16	TRANS
2665-26	TNFRSF17	SomaScan	KORA	cg10925082	-0.00404692	12	15114703	11965210	11968068	16	TRANS
2665-26	TNFRSF17	SomaScan	KORA	cg24173411	-0.0303803	3	105085465	11965210	11968068	16	TRANS
2665-26	TNFRSF17	SomaScan	KORA	cg02878414	0.00182786	2	71099177	11965210	11968068	16	TRANS
2665-26	TNFRSF17	SomaScan	KORA	cg19583379	-0.0052807	17	78387643	11965210	11968068	16	TRANS
2665-26	TNFRSF17	SomaScan	KORA	cg07903023	0.0121575	2	239048072	11965210	11968068	16	TRANS
2665-26	TNFRSF17	SomaScan	KORA	cg16519217	-0.00093464	6	31038713	11965210	11968068	16	TRANS
2665-26	TNFRSF17	SomaScan	KORA	cg10230257	-0.00709785	1	161928549	11965210	11968068	16	TRANS
2665-26	TNFRSF17	SomaScan	KORA	cg22727783	0.0112683	5	14441074	11965210	11968068	16	TRANS
2665-26	TNFRSF17	SomaScan	KORA	cg14440794	0.0186236	10	15254851	11965210	11968068	16	TRANS
2665-26	TNFRSF17	SomaScan	KORA	cg19695041	-0.000223887	8	38615330	11965210	11968068	16	TRANS
2665-26	TNFRSF17	SomaScan	KORA	cg24582510	0.00358696	10	68071346	11965210	11968068	16	TRANS
2665-26	TNFRSF17	SomaScan	KORA	cg08622729	-0.00685598	7	137230906	11965210	11968068	16	TRANS
2665-26	TNFRSF17	SomaScan	KORA	cg26535072	-0.0210782	9	72288156	11965210	11968068	16	TRANS
2665-26	TNFRSF17	SomaScan	KORA	cg10691866	-0.00331865	7	65817282	11965210	11968068	16	TRANS
2687-2	MIA	SomaScan	KORA	cg15803122	0.00917617	17	75277207	40771648	40777490	19	TRANS
2687-2	MIA	SomaScan	KORA	cg12177182	0.019918	6	168918116	40771648	40777490	19	TRANS
2687-2	MIA	SomaScan	KORA	cg15739543	0.0281406	5	6713426	40771648	40777490	19	TRANS
2687-2	MIA	SomaScan	KORA	cg05969038	0.00762806	7	213500	40771648	40777490	19	TRANS
2687-2	MIA	SomaScan	KORA	cg01620164	-0.00192151	2	164590272	40771648	40777490	19	TRANS
2687-2	MIA	SomaScan	KORA	cg22683035	0.00126843	19	3035674	40771648	40777490	19	TRANS
2687-2	MIA	SomaScan	KORA	cg11940847	-0.000564855	12	100660881	40771648	40777490	19	TRANS
2687-2	MIA	SomaScan	KORA	cg23510258	-0.000281264	17	80840821	40771648	40777490	19	TRANS
2687-2	MIA	SomaScan	KORA	cg16892443	0.00274567	20	24898990	40771648	40777490	19	TRANS
2687-2	MIA	SomaScan	KORA	cg26717995	-0.00073287	10	77161188	40771648	40777490	19	TRANS
2687-2	MIA	SomaScan	KORA	cg00973309	0.00423612	15	75111129	40771648	40777490	19	TRANS
2687-2	MIA	SomaScan	KORA	cg25675477	-0.0208759	6	107781010	40771648	40777490	19	TRANS
2687-2	MIA	SomaScan	KORA	cg01928910	0.0285901	1	31194314	40771648	40777490	19	TRANS
2687-2	MIA	SomaScan	KORA	cg17896965	-0.000162286	17	39728425	40771648	40777490	19	TRANS
2687-2	MIA	SomaScan	KORA	cg17881958	-0.00372529	10	50747314	40771648	40777490	19	TRANS
2687-2	MIA	SomaScan	KORA	cg16430909	0.00712473	10	61469845	40771648	40777490	19	TRANS
2687-2	MIA	SomaScan	KORA	cg25130238	-0.0109852	1	43637504	40771648	40777490	19	TRANS
2687-2	MIA	SomaScan	KORA	cg14915749	0.00553985	11	65627159	40771648	40777490	19	TRANS
2687-2	MIA	SomaScan	KORA	cg25932461	0.0130279	22	42229068	40771648	40777490	19	TRANS
2687-2	MIA	SomaScan	KORA	cg18294483	-0.00499497	11	96123194	40771648	40777490	19	TRANS
2687-2	MIA	SomaScan	KORA	cg16795290	0.00497978	2	219433115	40771648	40777490	19	TRANS
2687-2	MIA	SomaScan	KORA	cg03965198	0.00227637	11	125932701	40771648	40777490	19	TRANS
2687-2	MIA	SomaScan	KORA	cg19211077	-0.0030591	19	21658001	40771648	40777490	19	TRANS
2687-2	MIA	SomaScan	KORA	cg27661600	-0.0116999	12	56101736	40771648	40777490	19	TRANS
2687-2	MIA	SomaScan	KORA	cg20156545	0.00363959	21	28335020	40771648	40777490	19	TRANS
2687-2	MIA	SomaScan	KORA	cg23831876	0.0169787	2	65225988	40771648	40777490	19	TRANS
2687-2	MIA	SomaScan	KORA	cg07123890	0.00581782	16	84695337	40771648	40777490	19	TRANS
2687-2	MIA	SomaScan	KORA	cg20874668	-0.00129882	6	7685285	40771648	40777490	19	TRANS
2687-2	MIA	SomaScan	KORA	cg04147875	-0.000325384	16	1587610	40771648	40777490	19	TRANS
2687-2	MIA	SomaScan	KORA	cg03503785	0.00757164	16	23962572	40771648	40777490	19	TRANS
2687-2	MIA	SomaScan	KORA	cg15857490	0.00194367	8	70504263	40771648	40777490	19	TRANS
2687-2	MIA	SomaScan	KORA	cg00587890	-0.00969251	1	6207252	40771648	40777490	19	TRANS
2687-2	MIA	SomaScan	KORA	cg25716740	0.00396989	17	49337652	40771648	40777490	19	TRANS
2687-2	MIA	SomaScan	KORA	cg00276792	-0.0068561	16	3208796	40771648	40777490	19	TRANS
2687-2	MIA	SomaScan	KORA	cg03846107	-0.000410925	12	34061681	40771648	40777490	19	TRANS
2687-2	MIA	SomaScan	KORA	cg05658236	-0.0106682	1	47898911	40771648	40777490	19	TRANS
2687-2	MIA	SomaScan	KORA	cg19524824	-0.00730611	12	50023313	40771648	40777490	19	TRANS
2687-2	MIA	SomaScan	KORA	cg14594295	-0.00749903	4	3489931	40771648	40777490	19	TRANS
2687-2	MIA	SomaScan	KORA	cg25515091	0.00927388	2	27196810	40771648	40777490	19	TRANS
2687-2	MIA	SomaScan	KORA	cg07549924	0.0430619	4	54036	40771648	40777490	19	TRANS
2687-2	MIA	SomaScan	KORA	cg21337927	-0.00884598	18	33765057	40771648	40777490	19	TRANS
2687-2	MIA	SomaScan	KORA	cg18011760	-0.0067109	2	19320928	40771648	40777490	19	TRANS
2687-2	MIA	SomaScan	KORA	cg10440639	0.0160673	17	154499	40771648	40777490	19	TRANS
2687-2	MIA	SomaScan	KORA	cg15845821	-0.0191329	19	16830613	40771648	40777490	19	TRANS
2687-2	MIA	SomaScan	KORA	cg04757345	0.00630838	4	128918835	40771648	40777490	19	TRANS
2687-2	MIA	SomaScan	KORA	cg04551395	-0.00256827	4	151932911	40771648	40777490	19	TRANS
2687-2	MIA	SomaScan	KORA	cg19220923	-0.00820761	12	133018108	40771648	40777490	19	TRANS
2687-2	MIA	SomaScan	KORA	cg16969872	0.00520679	13	79968324	40771648	40777490	19	TRANS
2687-2	MIA	SomaScan	KORA	cg26910132	0.00144411	1	18396374	40771648	40777490	19	TRANS
2687-2	MIA	SomaScan	KORA	cg06690548	0.0190494	4	139162808	40771648	40777490	19	TRANS
2687-2	MIA	SomaScan	KORA	cg01715551	-0.0002604	20	57426789	40771648	40777490	19	TRANS
2687-2	MIA	SomaScan	KORA	cg20146909	0.0881015	1	90289611	40771648	40777490	19	TRANS
2687-2	MIA	SomaScan	KORA	cg07611000	0.00286007	11	65342262	40771648	40777490	19	TRANS
2687-2	MIA	SomaScan	KORA	cg23959976	-0.0157237	19	41187143	40771648	40777490	19	CIS
2687-2	MIA	SomaScan	KORA	cg26229224	-0.0115144	16	3018262	40771648	40777490	19	TRANS
2687-2	MIA	SomaScan	KORA	cg24655087	0.00544936	15	26416943	40771648	40777490	19	TRANS
2687-2	MIA	SomaScan	KORA	cg19266329	0.00352883	1	145456128	40771648	40777490	19	TRANS
2687-2	MIA	SomaScan	KORA	cg23490077	-0.00613818	6	112610645	40771648	40777490	19	TRANS
2687-2	MIA	SomaScan	KORA	cg17252489	0.0194077	2	169069249	40771648	40777490	19	TRANS
2687-2	MIA	SomaScan	KORA	cg03329539	0.012464	2	233283329	40771648	40777490	19	TRANS
2687-2	MIA	SomaScan	KORA	cg03412967	-0.0168181	7	143825736	40771648	40777490	19	TRANS
2687-2	MIA	SomaScan	KORA	cg06858185	-0.00322354	8	141468933	40771648	40777490	19	TRANS
2687-2	MIA	SomaScan	KORA	cg04676771	-0.011101	1	91176081	40771648	40777490	19	TRANS
2687-2	MIA	SomaScan	KORA	cg11421073	-0.00499443	3	69154156	40771648	40777490	19	TRANS
2687-2	MIA	SomaScan	KORA	cg20709046	-0.00355997	5	3128355	40771648	40777490	19	TRANS
2687-2	MIA	SomaScan	KORA	cg24841424	-0.0126189	19	57657658	40771648	40777490	19	TRANS
2687-2	MIA	SomaScan	KORA	cg17890691	0.00609762	1	240655701	40771648	40777490	19	TRANS
2687-2	MIA	SomaScan	KORA	cg04914281	-0.0165524	6	74009865	40771648	40777490	19	TRANS
2687-2	MIA	SomaScan	KORA	cg12647496	-0.00667918	1	115829856	40771648	40777490	19	TRANS
2705-5	CCL25	SomaScan	KORA	cg21133540	-0.000746206	17	80650253	8052318	8062660	19	TRANS
2705-5	CCL25	SomaScan	KORA	cg10043865	0.0199952	17	35294481	8052318	8062660	19	TRANS
2705-5	CCL25	SomaScan	KORA	cg03529015	0.00139755	17	80885682	8052318	8062660	19	TRANS
2705-5	CCL25	SomaScan	KORA	cg06838090	-0.00540024	6	170566002	8052318	8062660	19	TRANS
2705-5	CCL25	SomaScan	KORA	cg05368608	-0.0172987	16	898182	8052318	8062660	19	TRANS
2705-5	CCL25	SomaScan	KORA	cg26297866	-0.000952426	1	156052538	8052318	8062660	19	TRANS
2705-5	CCL25	SomaScan	KORA	cg18235026	0.0122859	7	129419139	8052318	8062660	19	TRANS
2705-5	CCL25	SomaScan	KORA	cg23424800	-0.0031586	8	10529811	8052318	8062660	19	TRANS
2705-5	CCL25	SomaScan	KORA	cg23213442	-0.00727877	4	47916056	8052318	8062660	19	TRANS
2705-5	CCL25	SomaScan	KORA	cg15906151	0.00937627	13	50018157	8052318	8062660	19	TRANS
2705-5	CCL25	SomaScan	KORA	cg11331028	-0.00232183	19	38697943	8052318	8062660	19	TRANS
2705-5	CCL25	SomaScan	KORA	cg04731544	0.00246225	19	49004834	8052318	8062660	19	TRANS
2705-5	CCL25	SomaScan	KORA	cg17623341	0.00280096	20	32273902	8052318	8062660	19	TRANS
2705-5	CCL25	SomaScan	KORA	cg06101725	5.42687e-05	13	40230077	8052318	8062660	19	TRANS
2705-5	CCL25	SomaScan	KORA	cg25856120	-0.00482822	17	46970223	8052318	8062660	19	TRANS
2705-5	CCL25	SomaScan	KORA	cg19511862	0.00174883	12	125478458	8052318	8062660	19	TRANS
2705-5	CCL25	SomaScan	KORA	cg04012515	-0.00933835	1	1911386	8052318	8062660	19	TRANS
2705-5	CCL25	SomaScan	KORA	cg21342910	0.000322316	17	48042779	8052318	8062660	19	TRANS
2705-5	CCL25	SomaScan	KORA	cg11478085	0.0236575	9	96929332	8052318	8062660	19	TRANS
2705-5	CCL25	SomaScan	KORA	cg22063247	0.00361572	11	133994642	8052318	8062660	19	TRANS
2705-5	CCL25	SomaScan	KORA	cg07998216	0.00418066	8	70584832	8052318	8062660	19	TRANS
2705-5	CCL25	SomaScan	KORA	cg03507277	-0.00758988	7	107765811	8052318	8062660	19	TRANS
2705-5	CCL25	SomaScan	KORA	cg11978634	0.0208464	13	43971194	8052318	8062660	19	TRANS
2705-5	CCL25	SomaScan	KORA	cg26871347	0.00526082	17	55371727	8052318	8062660	19	TRANS
2705-5	CCL25	SomaScan	KORA	cg12167564	0.000340979	1	236047034	8052318	8062660	19	TRANS
2705-5	CCL25	SomaScan	KORA	cg03316174	-0.0108856	11	57479994	8052318	8062660	19	TRANS
2705-5	CCL25	SomaScan	KORA	cg12674145	-0.00248941	13	107148020	8052318	8062660	19	TRANS
2705-5	CCL25	SomaScan	KORA	cg04378167	0.0100001	19	49944943	8052318	8062660	19	TRANS
2705-5	CCL25	SomaScan	KORA	cg27563968	0.000340582	12	13037811	8052318	8062660	19	TRANS
2705-5	CCL25	SomaScan	KORA	cg26519342	-0.00268256	16	30079121	8052318	8062660	19	TRANS
2705-5	CCL25	SomaScan	KORA	cg04336379	0.00512808	7	5111669	8052318	8062660	19	TRANS
2705-5	CCL25	SomaScan	KORA	cg07386898	0.00374262	15	83315627	8052318	8062660	19	TRANS
2705-5	CCL25	SomaScan	KORA	cg06642941	0.000806994	16	48643813	8052318	8062660	19	TRANS
2705-5	CCL25	SomaScan	KORA	cg00574958	-0.0288627	11	68607622	8052318	8062660	19	TRANS
2705-5	CCL25	SomaScan	KORA	cg14185808	0.0146083	2	105653893	8052318	8062660	19	TRANS
2705-5	CCL25	SomaScan	KORA	cg24068372	0.0178546	7	151107261	8052318	8062660	19	TRANS
2705-5	CCL25	SomaScan	KORA	cg26072213	-0.00313454	5	52095705	8052318	8062660	19	TRANS
2705-5	CCL25	SomaScan	KORA	cg09469355	-0.0267765	1	2161886	8052318	8062660	19	TRANS
2705-5	CCL25	SomaScan	KORA	cg00555666	-0.00616137	20	4721082	8052318	8062660	19	TRANS
2705-5	CCL25	SomaScan	KORA	cg27219691	-0.0177626	4	9950643	8052318	8062660	19	TRANS
2705-5	CCL25	SomaScan	KORA	cg17440248	0.00142154	1	207842303	8052318	8062660	19	TRANS
2705-5	CCL25	SomaScan	KORA	cg19693031	-0.033072	1	145441552	8052318	8062660	19	TRANS
2705-5	CCL25	SomaScan	KORA	cg07581775	0.00664466	8	47829660	8052318	8062660	19	TRANS
2705-5	CCL25	SomaScan	KORA	cg24155937	-0.00154277	1	97833212	8052318	8062660	19	TRANS
2705-5	CCL25	SomaScan	KORA	cg21722418	-0.0122405	20	61467586	8052318	8062660	19	TRANS
2705-5	CCL25	SomaScan	KORA	cg23652526	0.000358978	19	41768502	8052318	8062660	19	TRANS
2705-5	CCL25	SomaScan	KORA	cg16564894	0.00482322	7	150884429	8052318	8062660	19	TRANS
2705-5	CCL25	SomaScan	KORA	cg14632140	0.000869525	12	16758112	8052318	8062660	19	TRANS
2705-5	CCL25	SomaScan	KORA	cg15703756	-0.0245431	2	3750488	8052318	8062660	19	TRANS
2705-5	CCL25	SomaScan	KORA	cg26187942	-0.0156976	6	83837754	8052318	8062660	19	TRANS
2705-5	CCL25	SomaScan	KORA	cg05147735	0.0211522	2	219432768	8052318	8062660	19	TRANS
2705-5	CCL25	SomaScan	KORA	cg00165994	0.000664987	1	62054902	8052318	8062660	19	TRANS
2705-5	CCL25	SomaScan	KORA	cg12984580	0.0140453	8	11549859	8052318	8062660	19	TRANS
2705-5	CCL25	SomaScan	KORA	cg27243685	0.0152574	21	43642366	8052318	8062660	19	TRANS
2705-5	CCL25	SomaScan	KORA	cg15501231	0.00198846	6	31737630	8052318	8062660	19	TRANS
2705-5	CCL25	SomaScan	KORA	cg03389928	0.0227838	6	73493830	8052318	8062660	19	TRANS
2705-5	CCL25	SomaScan	KORA	cg10211383	0.016953	19	15580010	8052318	8062660	19	CIS
2705-5	CCL25	SomaScan	KORA	cg01257345	-0.0017328	17	26655561	8052318	8062660	19	TRANS
2705-5	CCL25	SomaScan	KORA	cg18634665	0.00402447	5	180615543	8052318	8062660	19	TRANS
2771-35	IGFBP1	SomaScan	KORA	cg12005760	0.01029	2	10183271	45888360	45893660	7	TRANS
2771-35	IGFBP1	SomaScan	KORA	cg05248234	-0.00716031	17	79495519	45888360	45893660	7	TRANS
2771-35	IGFBP1	SomaScan	KORA	cg15194935	0.0142398	19	10405955	45888360	45893660	7	TRANS
2771-35	IGFBP1	SomaScan	KORA	cg13722700	0.000426947	10	46993502	45888360	45893660	7	TRANS
2771-35	IGFBP1	SomaScan	KORA	cg27176796	0.0139058	16	84495427	45888360	45893660	7	TRANS
2771-35	IGFBP1	SomaScan	KORA	cg07134316	-0.00423052	12	57488112	45888360	45893660	7	TRANS
2771-35	IGFBP1	SomaScan	KORA	cg02995791	-0.00685518	10	3559223	45888360	45893660	7	TRANS
2771-35	IGFBP1	SomaScan	KORA	cg26385126	-0.00270469	12	124912021	45888360	45893660	7	TRANS
2771-35	IGFBP1	SomaScan	KORA	cg01666550	0.0036395	11	68183850	45888360	45893660	7	TRANS
2771-35	IGFBP1	SomaScan	KORA	cg01136750	-0.000453728	10	26986380	45888360	45893660	7	TRANS
2771-35	IGFBP1	SomaScan	KORA	cg00994936	-0.000193956	19	1423902	45888360	45893660	7	TRANS
2771-35	IGFBP1	SomaScan	KORA	cg15705062	0.00831006	19	5110748	45888360	45893660	7	TRANS
2771-35	IGFBP1	SomaScan	KORA	cg05301470	0.000699146	6	28558006	45888360	45893660	7	TRANS
2771-35	IGFBP1	SomaScan	KORA	cg21150486	-0.0132455	8	26148993	45888360	45893660	7	TRANS
2771-35	IGFBP1	SomaScan	KORA	cg05232694	0.0155558	20	48809539	45888360	45893660	7	TRANS
2771-35	IGFBP1	SomaScan	KORA	cg25428929	0.00971992	2	242606353	45888360	45893660	7	TRANS
2771-35	IGFBP1	SomaScan	KORA	cg02684904	-0.0182721	17	38137393	45888360	45893660	7	TRANS
2771-35	IGFBP1	SomaScan	KORA	cg19564098	0.0015639	10	124895697	45888360	45893660	7	TRANS
2771-35	IGFBP1	SomaScan	KORA	cg03725447	0.00651996	1	860008	45888360	45893660	7	TRANS
2771-35	IGFBP1	SomaScan	KORA	cg08319294	-0.0103012	19	43202122	45888360	45893660	7	TRANS
2771-35	IGFBP1	SomaScan	KORA	cg11019008	-0.00170695	10	131425282	45888360	45893660	7	TRANS
2771-35	IGFBP1	SomaScan	KORA	cg13747681	-0.000563758	11	66179783	45888360	45893660	7	TRANS
2771-35	IGFBP1	SomaScan	KORA	cg07068382	-0.0213871	6	36947277	45888360	45893660	7	TRANS
2771-35	IGFBP1	SomaScan	KORA	cg03972163	-0.0170052	1	224252086	45888360	45893660	7	TRANS
2771-35	IGFBP1	SomaScan	KORA	cg05054115	0.0015153	14	24422837	45888360	45893660	7	TRANS
2771-35	IGFBP1	SomaScan	KORA	cg06307943	0.0108968	17	79059375	45888360	45893660	7	TRANS
2771-35	IGFBP1	SomaScan	KORA	cg00116658	0.00437679	1	231163673	45888360	45893660	7	TRANS
2771-35	IGFBP1	SomaScan	KORA	cg24969672	0.0109651	10	71993207	45888360	45893660	7	TRANS
2771-35	IGFBP1	SomaScan	KORA	cg14250054	-0.000437787	9	35829428	45888360	45893660	7	TRANS
2771-35	IGFBP1	SomaScan	KORA	cg07916003	-0.00082228	12	72079824	45888360	45893660	7	TRANS
2771-35	IGFBP1	SomaScan	KORA	cg04603419	0.0147294	17	42061560	45888360	45893660	7	TRANS
2771-35	IGFBP1	SomaScan	KORA	cg17085666	-0.00763722	2	39005329	45888360	45893660	7	TRANS
2771-35	IGFBP1	SomaScan	KORA	cg06962442	-0.0265005	16	68271698	45888360	45893660	7	TRANS
2771-35	IGFBP1	SomaScan	KORA	cg06642617	-0.00414209	2	73461528	45888360	45893660	7	TRANS
2771-35	IGFBP1	SomaScan	KORA	cg22745355	0.00118971	7	2623374	45888360	45893660	7	TRANS
2771-35	IGFBP1	SomaScan	KORA	cg19266034	-0.0103275	7	108210536	45888360	45893660	7	TRANS
2771-35	IGFBP1	SomaScan	KORA	cg20083442	-0.00434332	8	73600575	45888360	45893660	7	TRANS
2771-35	IGFBP1	SomaScan	KORA	cg17426166	-0.0182166	1	81772046	45888360	45893660	7	TRANS
2771-35	IGFBP1	SomaScan	KORA	cg08167466	-0.0156192	13	48073444	45888360	45893660	7	TRANS
2771-35	IGFBP1	SomaScan	KORA	cg00500048	0.00730579	20	44097563	45888360	45893660	7	TRANS
2771-35	IGFBP1	SomaScan	KORA	cg26145959	-0.00204142	6	44310257	45888360	45893660	7	TRANS
2771-35	IGFBP1	SomaScan	KORA	cg05389183	-0.0102488	5	122372942	45888360	45893660	7	TRANS
2771-35	IGFBP1	SomaScan	KORA	cg12977447	0.000377934	12	4224915	45888360	45893660	7	TRANS
2771-35	IGFBP1	SomaScan	KORA	cg04285141	0.0110717	16	57872427	45888360	45893660	7	TRANS
2771-35	IGFBP1	SomaScan	KORA	cg07502936	0.00107111	19	58571638	45888360	45893660	7	TRANS
2771-35	IGFBP1	SomaScan	KORA	cg08735172	0.00226451	11	45722809	45888360	45893660	7	TRANS
2771-35	IGFBP1	SomaScan	KORA	cg14878150	-0.0230237	12	101673760	45888360	45893660	7	TRANS
2771-35	IGFBP1	SomaScan	KORA	cg14252492	-0.00124353	11	44332224	45888360	45893660	7	TRANS
2771-35	IGFBP1	SomaScan	KORA	cg13639901	-0.00755406	7	155556590	45888360	45893660	7	TRANS
2771-35	IGFBP1	SomaScan	KORA	cg11903854	0.00239809	6	3292969	45888360	45893660	7	TRANS
2771-35	IGFBP1	SomaScan	KORA	cg02727227	-0.00328492	2	9144505	45888360	45893660	7	TRANS
2771-35	IGFBP1	SomaScan	KORA	cg22950899	-0.000455992	19	5253997	45888360	45893660	7	TRANS
2771-35	IGFBP1	SomaScan	KORA	cg00441709	-0.0522201	17	2528280	45888360	45893660	7	TRANS
2771-35	IGFBP1	SomaScan	KORA	cg26403843	-0.00209615	5	158634085	45888360	45893660	7	TRANS
2771-35	IGFBP1	SomaScan	KORA	cg13478001	-0.0251271	11	1254063	45888360	45893660	7	TRANS
2771-35	IGFBP1	SomaScan	KORA	cg02069674	-0.00328297	16	82660317	45888360	45893660	7	TRANS
2771-35	IGFBP1	SomaScan	KORA	cg07536502	0.0135599	5	71852464	45888360	45893660	7	TRANS
2771-35	IGFBP1	SomaScan	KORA	cg06797156	0.000907366	8	124173733	45888360	45893660	7	TRANS
2771-35	IGFBP1	SomaScan	KORA	cg00860425	-0.0223502	19	3852027	45888360	45893660	7	TRANS
2771-35	IGFBP1	SomaScan	KORA	cg04749549	-0.00485018	19	17459798	45888360	45893660	7	TRANS
2771-35	IGFBP1	SomaScan	KORA	cg19112236	-0.000160147	7	70311532	45888360	45893660	7	TRANS
2771-35	IGFBP1	SomaScan	KORA	cg01597398	0.0186359	17	40250727	45888360	45893660	7	TRANS
2771-35	IGFBP1	SomaScan	KORA	cg18351448	0.0103294	10	34408586	45888360	45893660	7	TRANS
2771-35	IGFBP1	SomaScan	KORA	cg11643285	0.0493742	3	16411667	45888360	45893660	7	TRANS
2771-35	IGFBP1	SomaScan	KORA	cg10794086	-0.00494666	6	30455964	45888360	45893660	7	TRANS
2771-35	IGFBP1	SomaScan	KORA	cg00574958	0.0332457	11	68607622	45888360	45893660	7	TRANS
2771-35	IGFBP1	SomaScan	KORA	cg21544475	0.00563947	20	48431765	45888360	45893660	7	TRANS
2771-35	IGFBP1	SomaScan	KORA	cg21042285	-0.0118844	13	23954979	45888360	45893660	7	TRANS
2771-35	IGFBP1	SomaScan	KORA	cg16176675	-0.00207212	5	134786942	45888360	45893660	7	TRANS
2771-35	IGFBP1	SomaScan	KORA	cg18778299	-0.00666009	3	133649819	45888360	45893660	7	TRANS
2771-35	IGFBP1	SomaScan	KORA	cg03594868	-0.00523338	19	18234829	45888360	45893660	7	TRANS
2771-35	IGFBP1	SomaScan	KORA	cg09393448	0.00225043	6	2768616	45888360	45893660	7	TRANS
2771-35	IGFBP1	SomaScan	KORA	cg12593793	0.00806223	1	156074135	45888360	45893660	7	TRANS
2771-35	IGFBP1	SomaScan	KORA	cg20773033	-0.0213909	22	39635187	45888360	45893660	7	TRANS
2771-35	IGFBP1	SomaScan	KORA	cg16856722	-0.00953041	3	9920535	45888360	45893660	7	TRANS
2771-35	IGFBP1	SomaScan	KORA	cg20624041	-0.0020165	11	74204975	45888360	45893660	7	TRANS
2771-35	IGFBP1	SomaScan	KORA	cg05298458	0.0118141	22	19749188	45888360	45893660	7	TRANS
2771-35	IGFBP1	SomaScan	KORA	cg11211624	0.00746728	8	15542010	45888360	45893660	7	TRANS
2771-35	IGFBP1	SomaScan	KORA	cg03013070	-0.00563822	10	95965579	45888360	45893660	7	TRANS
2771-35	IGFBP1	SomaScan	KORA	cg22690075	-0.00152522	1	22109796	45888360	45893660	7	TRANS
2771-35	IGFBP1	SomaScan	KORA	cg06690548	0.00359612	4	139162808	45888360	45893660	7	TRANS
2771-35	IGFBP1	SomaScan	KORA	cg01396774	-0.00715608	2	218299024	45888360	45893660	7	TRANS
2771-35	IGFBP1	SomaScan	KORA	cg17384769	-0.0169638	6	149336332	45888360	45893660	7	TRANS
2771-35	IGFBP1	SomaScan	KORA	cg20458124	-0.01016	1	25869988	45888360	45893660	7	TRANS
2771-35	IGFBP1	SomaScan	KORA	cg17276103	0.0122151	1	85902974	45888360	45893660	7	TRANS
2771-35	IGFBP1	SomaScan	KORA	cg15254990	-0.0040635	7	130794990	45888360	45893660	7	TRANS
2771-35	IGFBP1	SomaScan	KORA	cg03493361	-0.0271013	14	35761420	45888360	45893660	7	TRANS
2771-35	IGFBP1	SomaScan	KORA	cg25094735	-0.0300167	19	50848024	45888360	45893660	7	TRANS
2771-35	IGFBP1	SomaScan	KORA	cg12944343	0.0110263	14	93698416	45888360	45893660	7	TRANS
2771-35	IGFBP1	SomaScan	KORA	cg10235845	-0.0180252	17	80860419	45888360	45893660	7	TRANS
2771-35	IGFBP1	SomaScan	KORA	cg17005223	0.00131901	5	77149950	45888360	45893660	7	TRANS
2771-35	IGFBP1	SomaScan	KORA	cg14476101	0.0425596	1	120255992	45888360	45893660	7	TRANS
2771-35	IGFBP1	SomaScan	KORA	cg27244482	0.00241248	5	149669488	45888360	45893660	7	TRANS
2771-35	IGFBP1	SomaScan	KORA	cg25178683	-0.0231749	17	76976267	45888360	45893660	7	TRANS
2771-35	IGFBP1	SomaScan	KORA	cg26538556	-0.000524083	13	95362829	45888360	45893660	7	TRANS
2771-35	IGFBP1	SomaScan	KORA	cg07306755	0.0126865	8	95274853	45888360	45893660	7	TRANS
2771-35	IGFBP1	SomaScan	KORA	cg11024682	-0.0362418	17	17730094	45888360	45893660	7	TRANS
2771-35	IGFBP1	SomaScan	KORA	cg17338254	0.0173104	22	19752522	45888360	45893660	7	TRANS
2771-35	IGFBP1	SomaScan	KORA	cg21813112	-0.00257449	1	115054104	45888360	45893660	7	TRANS
2771-35	IGFBP1	SomaScan	KORA	cg12600692	-0.00655253	2	198809390	45888360	45893660	7	TRANS
2771-35	IGFBP1	SomaScan	KORA	cg06500161	-0.0691471	21	43656587	45888360	45893660	7	TRANS
2771-35	IGFBP1	SomaScan	KORA	cg15077792	-0.000459701	10	73324481	45888360	45893660	7	TRANS
2771-35	IGFBP1	SomaScan	KORA	cg11263042	-0.000132664	1	10535052	45888360	45893660	7	TRANS
2771-35	IGFBP1	SomaScan	KORA	cg05824502	-0.000739337	6	137238824	45888360	45893660	7	TRANS
2771-35	IGFBP1	SomaScan	KORA	cg23355015	-0.00127857	11	64847796	45888360	45893660	7	TRANS
2771-35	IGFBP1	SomaScan	KORA	cg06362985	-0.00118675	12	70132208	45888360	45893660	7	TRANS
2771-35	IGFBP1	SomaScan	KORA	cg19300650	-0.00976688	1	171189771	45888360	45893660	7	TRANS
2771-35	IGFBP1	SomaScan	KORA	cg17086398	-0.000209745	1	31896392	45888360	45893660	7	TRANS
2771-35	IGFBP1	SomaScan	KORA	cg14508633	-7.3615e-05	7	103082905	45888360	45893660	7	TRANS
2771-35	IGFBP1	SomaScan	KORA	cg19458497	-0.0227116	11	63403371	45888360	45893660	7	TRANS
2771-35	IGFBP1	SomaScan	KORA	cg05171021	0.00703328	14	24422749	45888360	45893660	7	TRANS
2771-35	IGFBP1	SomaScan	KORA	cg14855874	-0.00356897	4	102712397	45888360	45893660	7	TRANS
2771-35	IGFBP1	SomaScan	KORA	cg13017813	0.0197628	14	77491023	45888360	45893660	7	TRANS
2771-35	IGFBP1	SomaScan	KORA	cg08622729	-0.000464785	7	137230906	45888360	45893660	7	TRANS
2771-35	IGFBP1	SomaScan	KORA	cg17486314	-0.00440357	6	90778227	45888360	45893660	7	TRANS
2771-35	IGFBP1	SomaScan	KORA	cg21917084	-0.00521429	8	65488308	45888360	45893660	7	TRANS
2771-35	IGFBP1	SomaScan	KORA	cg11562153	-0.00511148	6	28493500	45888360	45893660	7	TRANS
2771-35	IGFBP1	SomaScan	KORA	cg07687172	0.0083021	16	86840653	45888360	45893660	7	TRANS
2771-35	IGFBP1	SomaScan	KORA	cg24602369	-0.0150373	3	73652609	45888360	45893660	7	TRANS
2771-35	IGFBP1	SomaScan	KORA	cg16996262	-0.0100789	16	69600303	45888360	45893660	7	TRANS
2780-35	LTF	SomaScan	KORA	cg09198694	-0.00714535	6	43738026	46485234	46435645	3	TRANS
2780-35	LTF	SomaScan	KORA	cg21465517	-0.00179537	20	60961944	46485234	46435645	3	TRANS
2780-35	LTF	SomaScan	KORA	cg23657718	0.00429171	4	1495933	46485234	46435645	3	TRANS
2780-35	LTF	SomaScan	KORA	cg02897449	-0.00868702	7	140178796	46485234	46435645	3	TRANS
2780-35	LTF	SomaScan	KORA	cg13540960	-0.0114755	11	32450244	46485234	46435645	3	TRANS
2780-35	LTF	SomaScan	KORA	cg13153394	0.0013154	3	45209196	46485234	46435645	3	CIS
2780-35	LTF	SomaScan	KORA	cg12332415	0.0117271	2	109648095	46485234	46435645	3	TRANS
2780-35	LTF	SomaScan	KORA	cg01602621	-0.000468411	19	11689813	46485234	46435645	3	TRANS
2780-35	LTF	SomaScan	KORA	cg26265933	-0.0013269	12	132968020	46485234	46435645	3	TRANS
2780-35	LTF	SomaScan	KORA	cg01850934	0.00953278	14	68141664	46485234	46435645	3	TRANS
2780-35	LTF	SomaScan	KORA	cg24924502	0.00905134	17	79109777	46485234	46435645	3	TRANS
2780-35	LTF	SomaScan	KORA	cg25925670	-0.0169615	17	2206573	46485234	46435645	3	TRANS
2780-35	LTF	SomaScan	KORA	cg26824807	-0.00455246	6	28891448	46485234	46435645	3	TRANS
2780-35	LTF	SomaScan	KORA	cg08709672	-0.000304614	1	206224334	46485234	46435645	3	TRANS
2780-35	LTF	SomaScan	KORA	cg10436473	0.02043	5	158296050	46485234	46435645	3	TRANS
2780-35	LTF	SomaScan	KORA	cg04275506	0.00442892	1	12445337	46485234	46435645	3	TRANS
2780-35	LTF	SomaScan	KORA	cg09526215	0.00164446	5	69483768	46485234	46435645	3	TRANS
2780-35	LTF	SomaScan	KORA	cg03450842	-0.00454883	10	80834947	46485234	46435645	3	TRANS
2780-35	LTF	SomaScan	KORA	cg13997765	-0.0358269	8	143627866	46485234	46435645	3	TRANS
2780-35	LTF	SomaScan	KORA	cg05191264	-3.75641e-05	8	10428285	46485234	46435645	3	TRANS
2780-35	LTF	SomaScan	KORA	cg05122026	-0.0143398	11	75114223	46485234	46435645	3	TRANS
2780-35	LTF	SomaScan	KORA	cg20331322	-0.00459892	12	47358390	46485234	46435645	3	TRANS
2780-35	LTF	SomaScan	KORA	cg18820914	-0.0211545	13	111371465	46485234	46435645	3	TRANS
2780-35	LTF	SomaScan	KORA	cg06034664	0.0119455	6	168354502	46485234	46435645	3	TRANS
2780-35	LTF	SomaScan	KORA	cg10289177	-0.0070345	7	150748069	46485234	46435645	3	TRANS
2780-35	LTF	SomaScan	KORA	cg00971369	-0.000590275	8	142263802	46485234	46435645	3	TRANS
2780-35	LTF	SomaScan	KORA	cg00723277	-0.0139817	1	27343013	46485234	46435645	3	TRANS
2780-35	LTF	SomaScan	KORA	cg05222924	-0.00239897	11	32450486	46485234	46435645	3	TRANS
2780-35	LTF	SomaScan	KORA	cg14088282	0.00202801	1	222003220	46485234	46435645	3	TRANS
2780-35	LTF	SomaScan	KORA	cg04286043	0.0028146	6	36410500	46485234	46435645	3	TRANS
2780-35	LTF	SomaScan	KORA	cg07775813	-0.00594677	15	69223368	46485234	46435645	3	TRANS
2780-35	LTF	SomaScan	KORA	cg23570810	0.0237129	11	315102	46485234	46435645	3	TRANS
2780-35	LTF	SomaScan	KORA	cg00452199	-0.031195	11	44088257	46485234	46435645	3	TRANS
2780-35	LTF	SomaScan	KORA	cg06791091	0.00101515	12	3332539	46485234	46435645	3	TRANS
2780-35	LTF	SomaScan	KORA	cg17304025	0.0166315	7	143699825	46485234	46435645	3	TRANS
2780-35	LTF	SomaScan	KORA	cg10690277	-0.00788752	7	55113199	46485234	46435645	3	TRANS
2780-35	LTF	SomaScan	KORA	cg20442697	6.54959e-05	7	102553432	46485234	46435645	3	TRANS
2780-35	LTF	SomaScan	KORA	cg26475594	0.0104574	19	35260608	46485234	46435645	3	TRANS
2780-35	LTF	SomaScan	KORA	cg21720306	-0.00515007	11	73044732	46485234	46435645	3	TRANS
2780-35	LTF	SomaScan	KORA	cg03211283	-0.00793441	22	31893096	46485234	46435645	3	TRANS
2780-35	LTF	SomaScan	KORA	cg01756799	-0.00561375	17	40715281	46485234	46435645	3	TRANS
2780-35	LTF	SomaScan	KORA	cg13827287	-0.00531313	12	54730461	46485234	46435645	3	TRANS
2780-35	LTF	SomaScan	KORA	cg14669514	-0.0235395	13	22243722	46485234	46435645	3	TRANS
2780-35	LTF	SomaScan	KORA	cg00187059	-0.00448192	6	33289693	46485234	46435645	3	TRANS
2780-35	LTF	SomaScan	KORA	cg27101633	0.00907518	8	48427018	46485234	46435645	3	TRANS
2780-35	LTF	SomaScan	KORA	cg16521443	0.0227031	13	114867544	46485234	46435645	3	TRANS
2780-35	LTF	SomaScan	KORA	cg26703534	-0.0305076	5	377358	46485234	46435645	3	TRANS
2780-35	LTF	SomaScan	KORA	cg08503681	0.000444546	5	145895884	46485234	46435645	3	TRANS
2780-35	LTF	SomaScan	KORA	cg06362282	-0.00369063	6	33245893	46485234	46435645	3	TRANS
2780-35	LTF	SomaScan	KORA	cg16936953	0.00678104	17	57915665	46485234	46435645	3	TRANS
2780-35	LTF	SomaScan	KORA	cg18346531	0.0279516	17	9967431	46485234	46435645	3	TRANS
2816-50	BCAM	SomaScan	KORA	cg04689082	0.0470839	3	194406572	44809071	44821421	19	TRANS
2826-53	EDA	SomaScan	KORA	cg25925896	-0.00692386	19	8468673	69616067	70039472	X	TRANS
2826-53	EDA	SomaScan	KORA	cg20964328	0.0146256	7	11013816	69616067	70039472	X	TRANS
2826-53	EDA	SomaScan	KORA	cg14159576	-0.00952489	7	47660962	69616067	70039472	X	TRANS
2826-53	EDA	SomaScan	KORA	cg08818337	-0.00843624	5	149962501	69616067	70039472	X	TRANS
2826-53	EDA	SomaScan	KORA	cg06866187	-0.0221506	16	86489453	69616067	70039472	X	TRANS
2826-53	EDA	SomaScan	KORA	cg03725309	0.0226317	1	109757585	69616067	70039472	X	TRANS
2826-53	EDA	SomaScan	KORA	cg08599699	-0.0228289	19	1581001	69616067	70039472	X	TRANS
2826-53	EDA	SomaScan	KORA	cg24485038	-0.106733	1	9657892	69616067	70039472	X	TRANS
2826-53	EDA	SomaScan	KORA	cg06308022	-0.0319589	6	43858585	69616067	70039472	X	TRANS
2826-53	EDA	SomaScan	KORA	cg13787768	-0.0348532	9	137679142	69616067	70039472	X	TRANS
2851-63	C5	SomaScan	KORA	cg27113548	-0.00104624	14	106354912	121050275	120952335	9	TRANS
2851-63	C5	SomaScan	KORA	cg15803122	-0.016014	17	75277207	121050275	120952335	9	TRANS
2851-63	C5	SomaScan	KORA	cg04376644	-0.0177545	3	45730747	121050275	120952335	9	TRANS
2851-63	C5	SomaScan	KORA	cg02342974	0.0175774	20	18269074	121050275	120952335	9	TRANS
2851-63	C5	SomaScan	KORA	cg24694947	-0.00280065	13	111981262	121050275	120952335	9	TRANS
2851-63	C5	SomaScan	KORA	cg02064366	0.00386645	17	79045526	121050275	120952335	9	TRANS
2851-63	C5	SomaScan	KORA	cg14626490	-0.000586134	9	131710514	121050275	120952335	9	TRANS
2851-63	C5	SomaScan	KORA	cg15251779	-0.0154943	7	150929295	121050275	120952335	9	TRANS
2851-63	C5	SomaScan	KORA	cg06898306	0.0320565	6	33996673	121050275	120952335	9	TRANS
2851-63	C5	SomaScan	KORA	cg03952331	-0.00113356	22	20792222	121050275	120952335	9	TRANS
2851-63	C5	SomaScan	KORA	cg10342884	0.0160084	19	44124032	121050275	120952335	9	TRANS
2851-63	C5	SomaScan	KORA	cg26567712	-0.00912448	19	18043782	121050275	120952335	9	TRANS
2851-63	C5	SomaScan	KORA	cg00560671	6.95936e-05	13	21635735	121050275	120952335	9	TRANS
2851-63	C5	SomaScan	KORA	cg22637837	0.0214421	5	140730092	121050275	120952335	9	TRANS
2851-63	C5	SomaScan	KORA	cg19757253	-0.00421903	2	32853039	121050275	120952335	9	TRANS
2851-63	C5	SomaScan	KORA	cg12887701	-0.00334625	11	96123196	121050275	120952335	9	TRANS
2851-63	C5	SomaScan	KORA	cg02513924	-0.026807	11	124823857	121050275	120952335	9	TRANS
2851-63	C5	SomaScan	KORA	cg10673833	0.0215969	7	45018849	121050275	120952335	9	TRANS
2851-63	C5	SomaScan	KORA	cg15307908	-0.00345682	8	124553582	121050275	120952335	9	TRANS
2851-63	C5	SomaScan	KORA	cg09904383	0.00802008	5	141031125	121050275	120952335	9	TRANS
2851-63	C5	SomaScan	KORA	cg17420132	0.00155327	1	21930321	121050275	120952335	9	TRANS
2851-63	C5	SomaScan	KORA	cg22496723	0.00685166	22	36960779	121050275	120952335	9	TRANS
2851-63	C5	SomaScan	KORA	cg05375668	0.00840887	15	63796746	121050275	120952335	9	TRANS
2851-63	C5	SomaScan	KORA	cg03886085	0.00168538	11	619819	121050275	120952335	9	TRANS
2851-63	C5	SomaScan	KORA	cg19844653	0.0234286	5	133451294	121050275	120952335	9	TRANS
2851-63	C5	SomaScan	KORA	cg04341730	0.00889838	4	175135312	121050275	120952335	9	TRANS
2851-63	C5	SomaScan	KORA	cg08617970	-0.00421632	6	30881112	121050275	120952335	9	TRANS
2851-63	C5	SomaScan	KORA	cg04112012	0.00358738	16	1359112	121050275	120952335	9	TRANS
2851-63	C5	SomaScan	KORA	cg20744625	0.0210514	10	64578469	121050275	120952335	9	TRANS
2851-63	C5	SomaScan	KORA	cg24083557	-0.000533687	11	62420776	121050275	120952335	9	TRANS
2851-63	C5	SomaScan	KORA	cg10725121	-0.000922975	17	43973146	121050275	120952335	9	TRANS
2851-63	C5	SomaScan	KORA	cg26785250	0.0131935	3	13461660	121050275	120952335	9	TRANS
2851-63	C5	SomaScan	KORA	cg26490274	0.000149377	16	4385435	121050275	120952335	9	TRANS
2851-63	C5	SomaScan	KORA	cg12538950	0.0256206	11	74022910	121050275	120952335	9	TRANS
2851-63	C5	SomaScan	KORA	cg13775495	-0.0044265	3	159706543	121050275	120952335	9	TRANS
2851-63	C5	SomaScan	KORA	cg19176816	0.00506403	10	112679255	121050275	120952335	9	TRANS
2851-63	C5	SomaScan	KORA	cg02194243	0.000662174	16	54324597	121050275	120952335	9	TRANS
2851-63	C5	SomaScan	KORA	cg11254573	0.00851589	8	1449634	121050275	120952335	9	TRANS
2851-63	C5	SomaScan	KORA	cg10979117	-0.0344645	10	134772055	121050275	120952335	9	TRANS
2851-63	C5	SomaScan	KORA	cg17925360	-0.00184601	2	201981146	121050275	120952335	9	TRANS
2851-63	C5	SomaScan	KORA	cg13523882	-0.0288104	6	107435665	121050275	120952335	9	TRANS
2851-63	C5	SomaScan	KORA	cg20945376	0.000458385	14	91805912	121050275	120952335	9	TRANS
2851-63	C5	SomaScan	KORA	cg14603420	-0.000668463	8	1359730	121050275	120952335	9	TRANS
2851-63	C5	SomaScan	KORA	cg23695687	0.0033466	19	54926734	121050275	120952335	9	TRANS
2851-63	C5	SomaScan	KORA	cg02063828	0.00645025	2	64371766	121050275	120952335	9	TRANS
2851-63	C5	SomaScan	KORA	cg08196561	-0.000801198	16	87525539	121050275	120952335	9	TRANS
2851-63	C5	SomaScan	KORA	cg23643435	-0.00146985	2	38893251	121050275	120952335	9	TRANS
2851-63	C5	SomaScan	KORA	cg01256539	-0.0258487	5	119802022	121050275	120952335	9	TRANS
2851-63	C5	SomaScan	KORA	cg10052597	0.0204002	12	132903921	121050275	120952335	9	TRANS
2851-63	C5	SomaScan	KORA	cg21532953	0.00166479	13	25496565	121050275	120952335	9	TRANS
2851-63	C5	SomaScan	KORA	cg22204479	0.00773597	20	21378227	121050275	120952335	9	TRANS
2851-63	C5	SomaScan	KORA	cg20217649	-0.0184849	8	67835351	121050275	120952335	9	TRANS
2851-63	C5	SomaScan	KORA	cg01238672	0.00210703	6	170232143	121050275	120952335	9	TRANS
2851-63	C5	SomaScan	KORA	cg00397324	0.0110838	21	42798594	121050275	120952335	9	TRANS
2851-63	C5	SomaScan	KORA	cg10063637	0.00795343	16	4524514	121050275	120952335	9	TRANS
2851-63	C5	SomaScan	KORA	cg24707051	0.00908835	12	49393681	121050275	120952335	9	TRANS
2851-63	C5	SomaScan	KORA	cg04756051	-0.00404057	6	160908522	121050275	120952335	9	TRANS
2851-63	C5	SomaScan	KORA	cg09996840	0.00833452	17	79680718	121050275	120952335	9	TRANS
2851-63	C5	SomaScan	KORA	cg06134546	0.00273393	15	64753130	121050275	120952335	9	TRANS
2851-63	C5	SomaScan	KORA	cg08130783	-0.00224185	1	36056577	121050275	120952335	9	TRANS
2851-63	C5	SomaScan	KORA	cg23315424	0.000137133	14	101162021	121050275	120952335	9	TRANS
2851-63	C5	SomaScan	KORA	cg27511255	-0.0143995	20	47444851	121050275	120952335	9	TRANS
2851-63	C5	SomaScan	KORA	cg26228812	0.0136832	6	170041959	121050275	120952335	9	TRANS
2851-63	C5	SomaScan	KORA	cg02988316	-0.000171686	9	504774	121050275	120952335	9	TRANS
2851-63	C5	SomaScan	KORA	cg12988843	0.0105292	13	53029588	121050275	120952335	9	TRANS
2851-63	C5	SomaScan	KORA	cg07023915	0.00428062	15	78370148	121050275	120952335	9	TRANS
2851-63	C5	SomaScan	KORA	cg03257743	0.00423994	2	11123616	121050275	120952335	9	TRANS
2851-63	C5	SomaScan	KORA	cg26172862	-0.00722455	14	60558473	121050275	120952335	9	TRANS
2851-63	C5	SomaScan	KORA	cg18470710	-0.00298024	15	99558719	121050275	120952335	9	TRANS
2851-63	C5	SomaScan	KORA	cg19004594	0.00776072	20	43926884	121050275	120952335	9	TRANS
2851-63	C5	SomaScan	KORA	cg11549132	0.00462193	2	99061257	121050275	120952335	9	TRANS
2851-63	C5	SomaScan	KORA	cg09359749	0.013942	17	70378201	121050275	120952335	9	TRANS
2851-63	C5	SomaScan	KORA	cg17498272	0.00185945	19	58864929	121050275	120952335	9	TRANS
2851-63	C5	SomaScan	KORA	cg16268160	-0.0148113	11	124735218	121050275	120952335	9	TRANS
2851-63	C5	SomaScan	KORA	cg08146708	-0.0259826	1	167393634	121050275	120952335	9	TRANS
2851-63	C5	SomaScan	KORA	cg27037018	-0.00354645	5	1445567	121050275	120952335	9	TRANS
2851-63	C5	SomaScan	KORA	cg05262369	0.0240275	1	205716365	121050275	120952335	9	TRANS
2851-63	C5	SomaScan	KORA	cg19750657	0.00503467	13	38935967	121050275	120952335	9	TRANS
2851-63	C5	SomaScan	KORA	cg08373989	0.00469684	6	31780239	121050275	120952335	9	TRANS
2851-63	C5	SomaScan	KORA	cg22821472	0.0027306	8	70743568	121050275	120952335	9	TRANS
2851-63	C5	SomaScan	KORA	cg11649376	-0.00492188	12	81473234	121050275	120952335	9	TRANS
2851-63	C5	SomaScan	KORA	cg25520422	-0.00477062	11	88240817	121050275	120952335	9	TRANS
2851-63	C5	SomaScan	KORA	cg15940260	-0.0143793	17	47113061	121050275	120952335	9	TRANS
2851-63	C5	SomaScan	KORA	cg05811904	-0.000790626	7	137620397	121050275	120952335	9	TRANS
2851-63	C5	SomaScan	KORA	cg26933359	0.00598716	14	20937370	121050275	120952335	9	TRANS
2851-63	C5	SomaScan	KORA	cg01591830	0.0176973	16	89666000	121050275	120952335	9	TRANS
2851-63	C5	SomaScan	KORA	cg01820106	-0.00402819	2	207646603	121050275	120952335	9	TRANS
2851-63	C5	SomaScan	KORA	cg08634539	0.00201476	14	60631988	121050275	120952335	9	TRANS
2851-63	C5	SomaScan	KORA	cg11720950	-0.00733164	6	32223114	121050275	120952335	9	TRANS
2851-63	C5	SomaScan	KORA	cg10442113	0.0116563	5	151329120	121050275	120952335	9	TRANS
2851-63	C5	SomaScan	KORA	cg17501210	-0.0676577	6	166970252	121050275	120952335	9	TRANS
2851-63	C5	SomaScan	KORA	cg23142964	0.00954289	1	85156566	121050275	120952335	9	TRANS
2851-63	C5	SomaScan	KORA	cg21113318	0.0161901	14	92983645	121050275	120952335	9	TRANS
2851-63	C5	SomaScan	KORA	cg05604112	-0.004953	2	38893237	121050275	120952335	9	TRANS
2851-63	C5	SomaScan	KORA	cg00995368	-7.7784e-05	6	32627885	121050275	120952335	9	TRANS
2851-63	C5	SomaScan	KORA	cg22082665	0.00292794	1	245011429	121050275	120952335	9	TRANS
2851-63	C5	SomaScan	KORA	cg23845310	0.00801151	20	45138738	121050275	120952335	9	TRANS
2851-63	C5	SomaScan	KORA	cg05383328	-0.00221444	12	123471521	121050275	120952335	9	TRANS
2851-63	C5	SomaScan	KORA	cg12528115	0.0025147	3	115507015	121050275	120952335	9	TRANS
2851-63	C5	SomaScan	KORA	cg18118198	0.0443793	14	25100740	121050275	120952335	9	TRANS
2851-63	C5	SomaScan	KORA	cg12068280	0.00374067	19	46804528	121050275	120952335	9	TRANS
2851-63	C5	SomaScan	KORA	cg02469539	0.000703292	12	107117129	121050275	120952335	9	TRANS
2851-63	C5	SomaScan	KORA	cg05227621	0.0179936	22	42313995	121050275	120952335	9	TRANS
2851-63	C5	SomaScan	KORA	cg17316414	-0.00178696	5	111503193	121050275	120952335	9	TRANS
2851-63	C5	SomaScan	KORA	cg13364749	0.0180371	5	89560863	121050275	120952335	9	TRANS
2851-63	C5	SomaScan	KORA	cg00932510	-0.00191243	22	30782804	121050275	120952335	9	TRANS
2851-63	C5	SomaScan	KORA	cg00956679	-0.00533046	14	77462606	121050275	120952335	9	TRANS
2851-63	C5	SomaScan	KORA	cg20909664	-0.00407085	19	46390261	121050275	120952335	9	TRANS
2851-63	C5	SomaScan	KORA	cg10691592	0.000940514	3	128337033	121050275	120952335	9	TRANS
2851-63	C5	SomaScan	KORA	cg07119463	0.00574681	14	78630749	121050275	120952335	9	TRANS
2851-63	C5	SomaScan	KORA	cg15342087	-0.00616692	6	30720209	121050275	120952335	9	TRANS
2851-63	C5	SomaScan	KORA	cg02398342	0.00600507	17	80708632	121050275	120952335	9	TRANS
2851-63	C5	SomaScan	KORA	cg21747442	0.00366201	5	1487166	121050275	120952335	9	TRANS
2851-63	C5	SomaScan	KORA	cg23393242	0.00417844	7	156813480	121050275	120952335	9	TRANS
2851-63	C5	SomaScan	KORA	cg14971269	-0.00569075	17	76498808	121050275	120952335	9	TRANS
2851-63	C5	SomaScan	KORA	cg06483978	0.00201458	17	79967042	121050275	120952335	9	TRANS
2851-63	C5	SomaScan	KORA	cg00486708	-0.00375974	10	44145111	121050275	120952335	9	TRANS
2851-63	C5	SomaScan	KORA	cg11282718	-0.0035717	3	14167245	121050275	120952335	9	TRANS
2851-63	C5	SomaScan	KORA	cg08271632	-0.00064144	11	44586603	121050275	120952335	9	TRANS
2851-63	C5	SomaScan	KORA	cg16404364	-0.00133759	7	1006746	121050275	120952335	9	TRANS
2851-63	C5	SomaScan	KORA	cg21117330	0.0192975	5	140772286	121050275	120952335	9	TRANS
2851-63	C5	SomaScan	KORA	cg19480117	0.0111176	10	131752869	121050275	120952335	9	TRANS
2851-63	C5	SomaScan	KORA	cg06248061	0.00644587	10	135372380	121050275	120952335	9	TRANS
2851-63	C5	SomaScan	KORA	cg02407308	0.0045344	9	139400599	121050275	120952335	9	TRANS
2851-63	C5	SomaScan	KORA	cg00948520	-0.00117761	16	4000652	121050275	120952335	9	TRANS
2851-63	C5	SomaScan	KORA	cg19902591	-0.00388894	1	6130767	121050275	120952335	9	TRANS
2851-63	C5	SomaScan	KORA	cg15413523	0.0260892	5	133451625	121050275	120952335	9	TRANS
2851-63	C5	SomaScan	KORA	cg21869765	-0.000100264	5	72125136	121050275	120952335	9	TRANS
2851-63	C5	SomaScan	KORA	cg08644973	0.00273992	6	31668721	121050275	120952335	9	TRANS
2851-63	C5	SomaScan	KORA	cg16130238	0.0342784	14	22958402	121050275	120952335	9	TRANS
2851-63	C5	SomaScan	KORA	cg02447879	-0.0121369	17	79393682	121050275	120952335	9	TRANS
2851-63	C5	SomaScan	KORA	cg17459911	0.00798468	15	71968614	121050275	120952335	9	TRANS
2851-63	C5	SomaScan	KORA	cg10626559	0.0133421	6	99281862	121050275	120952335	9	TRANS
2851-63	C5	SomaScan	KORA	cg24848467	0.00308024	6	28134517	121050275	120952335	9	TRANS
2851-63	C5	SomaScan	KORA	cg11050116	-0.00314877	8	17780536	121050275	120952335	9	TRANS
2851-63	C5	SomaScan	KORA	cg22603960	0.0112066	7	6743091	121050275	120952335	9	TRANS
2851-63	C5	SomaScan	KORA	cg09910120	-0.00519624	10	131190389	121050275	120952335	9	TRANS
2851-63	C5	SomaScan	KORA	cg00574958	-0.00415027	11	68607622	121050275	120952335	9	TRANS
2851-63	C5	SomaScan	KORA	cg05294455	0.0121624	17	45286609	121050275	120952335	9	TRANS
2851-63	C5	SomaScan	KORA	cg03202935	0.00129386	15	25442696	121050275	120952335	9	TRANS
2851-63	C5	SomaScan	KORA	cg04522984	0.00276787	4	114238277	121050275	120952335	9	TRANS
2851-63	C5	SomaScan	KORA	cg15903282	-0.00485337	3	134513690	121050275	120952335	9	TRANS
2851-63	C5	SomaScan	KORA	cg03725309	-0.00257712	1	109757585	121050275	120952335	9	TRANS
2851-63	C5	SomaScan	KORA	cg10237817	-0.00424685	1	154519846	121050275	120952335	9	TRANS
2851-63	C5	SomaScan	KORA	cg00607196	0.0125028	14	58619480	121050275	120952335	9	TRANS
2851-63	C5	SomaScan	KORA	cg21669326	-0.0198509	7	47267691	121050275	120952335	9	TRANS
2851-63	C5	SomaScan	KORA	cg07676709	-0.021943	17	46673442	121050275	120952335	9	TRANS
2851-63	C5	SomaScan	KORA	cg16931664	0.00639116	11	11169707	121050275	120952335	9	TRANS
2851-63	C5	SomaScan	KORA	cg17373022	-0.00288528	10	54539758	121050275	120952335	9	TRANS
2851-63	C5	SomaScan	KORA	cg18828306	0.00177539	11	17555864	121050275	120952335	9	TRANS
2851-63	C5	SomaScan	KORA	cg27304738	0.0107982	6	160527453	121050275	120952335	9	TRANS
2851-63	C5	SomaScan	KORA	cg00054774	-0.000646625	21	43373079	121050275	120952335	9	TRANS
2851-63	C5	SomaScan	KORA	cg02864688	0.0110874	1	11752342	121050275	120952335	9	TRANS
2851-63	C5	SomaScan	KORA	cg00809820	0.00537459	17	80708513	121050275	120952335	9	TRANS
2851-63	C5	SomaScan	KORA	cg21889181	-0.0103116	11	77883838	121050275	120952335	9	TRANS
2851-63	C5	SomaScan	KORA	cg25154306	-0.00051617	1	2333762	121050275	120952335	9	TRANS
2851-63	C5	SomaScan	KORA	cg15904623	0.00373888	7	128488744	121050275	120952335	9	TRANS
2851-63	C5	SomaScan	KORA	cg00231754	0.0033126	2	38176859	121050275	120952335	9	TRANS
2851-63	C5	SomaScan	KORA	cg02340576	-0.002415	17	1933726	121050275	120952335	9	TRANS
2851-63	C5	SomaScan	KORA	cg09181500	0.00933325	1	229572706	121050275	120952335	9	TRANS
2851-63	C5	SomaScan	KORA	cg18372353	-0.000107143	15	35838733	121050275	120952335	9	TRANS
2851-63	C5	SomaScan	KORA	cg17057625	0.0032216	3	194197025	121050275	120952335	9	TRANS
2851-63	C5	SomaScan	KORA	cg13745678	-0.00786072	4	109253949	121050275	120952335	9	TRANS
2851-63	C5	SomaScan	KORA	cg05407200	0.00231907	11	93586725	121050275	120952335	9	TRANS
2851-63	C5	SomaScan	KORA	cg17527975	-0.0069235	8	142192487	121050275	120952335	9	TRANS
2851-63	C5	SomaScan	KORA	cg11829633	-0.00132857	14	104273589	121050275	120952335	9	TRANS
2851-63	C5	SomaScan	KORA	cg22281866	0.00897154	6	126101997	121050275	120952335	9	TRANS
2851-63	C5	SomaScan	KORA	cg01738650	-0.0148555	6	32223076	121050275	120952335	9	TRANS
2851-63	C5	SomaScan	KORA	cg20944133	0.0067956	11	111957280	121050275	120952335	9	TRANS
2851-63	C5	SomaScan	KORA	cg07092029	0.00205045	16	83682278	121050275	120952335	9	TRANS
2851-63	C5	SomaScan	KORA	cg18134411	-0.00812956	6	312058	121050275	120952335	9	TRANS
2851-63	C5	SomaScan	KORA	cg03789645	0.00596911	7	148394842	121050275	120952335	9	TRANS
2851-63	C5	SomaScan	KORA	cg03145486	0.00405331	6	32180187	121050275	120952335	9	TRANS
2851-63	C5	SomaScan	KORA	cg03011024	-0.00587303	18	76258493	121050275	120952335	9	TRANS
2851-63	C5	SomaScan	KORA	cg15732230	-0.0102591	19	51487280	121050275	120952335	9	TRANS
2851-63	C5	SomaScan	KORA	cg04149424	0.0076771	15	50559172	121050275	120952335	9	TRANS
2851-63	C5	SomaScan	KORA	cg14232082	-0.00843774	15	101728629	121050275	120952335	9	TRANS
2851-63	C5	SomaScan	KORA	cg01378578	-0.00259569	1	207226824	121050275	120952335	9	TRANS
2851-63	C5	SomaScan	KORA	cg24204406	0.0474423	2	86156243	121050275	120952335	9	TRANS
2851-63	C5	SomaScan	KORA	cg16393928	0.00407344	1	3135836	121050275	120952335	9	TRANS
2851-63	C5	SomaScan	KORA	cg08041481	0.00527005	6	100902470	121050275	120952335	9	TRANS
2851-63	C5	SomaScan	KORA	cg23216015	0.00537823	7	31726654	121050275	120952335	9	TRANS
2851-63	C5	SomaScan	KORA	cg11453174	-0.00389928	6	136512768	121050275	120952335	9	TRANS
2851-63	C5	SomaScan	KORA	cg13962681	0.00084326	1	213223461	121050275	120952335	9	TRANS
2851-63	C5	SomaScan	KORA	cg21750659	-0.00819634	8	119045287	121050275	120952335	9	TRANS
2851-63	C5	SomaScan	KORA	cg05545914	0.00168688	16	51167855	121050275	120952335	9	TRANS
2851-63	C5	SomaScan	KORA	cg18592964	0.00432365	5	96051476	121050275	120952335	9	TRANS
2851-63	C5	SomaScan	KORA	cg04424621	-0.00926797	6	27101941	121050275	120952335	9	TRANS
2851-63	C5	SomaScan	KORA	cg03893692	-0.00782232	5	149669484	121050275	120952335	9	TRANS
2851-63	C5	SomaScan	KORA	cg14193678	-0.0165154	3	44666490	121050275	120952335	9	TRANS
2851-63	C5	SomaScan	KORA	cg12689888	-0.0107348	1	93741342	121050275	120952335	9	TRANS
2851-63	C5	SomaScan	KORA	cg26649394	-0.00342979	18	32870462	121050275	120952335	9	TRANS
2851-63	C5	SomaScan	KORA	cg06872115	0.0230657	17	26871676	121050275	120952335	9	TRANS
2851-63	C5	SomaScan	KORA	cg02963689	0.0125223	6	33967519	121050275	120952335	9	TRANS
2851-63	C5	SomaScan	KORA	cg07258983	-0.0134322	18	42255459	121050275	120952335	9	TRANS
2851-63	C5	SomaScan	KORA	cg01939443	-0.00292555	1	182456796	121050275	120952335	9	TRANS
2851-63	C5	SomaScan	KORA	cg23937382	0.0049579	19	58549531	121050275	120952335	9	TRANS
2851-63	C5	SomaScan	KORA	cg05517233	-0.0125412	5	135468041	121050275	120952335	9	TRANS
2851-63	C5	SomaScan	KORA	cg24618354	-0.00294837	12	88535429	121050275	120952335	9	TRANS
2851-63	C5	SomaScan	KORA	cg20412539	-0.000413204	7	999153	121050275	120952335	9	TRANS
2851-63	C5	SomaScan	KORA	cg18181703	-0.0123229	17	76354621	121050275	120952335	9	TRANS
2851-63	C5	SomaScan	KORA	cg24694018	-0.00363118	1	145457621	121050275	120952335	9	TRANS
2851-63	C5	SomaScan	KORA	cg12807937	0.0122722	2	240965920	121050275	120952335	9	TRANS
2851-63	C5	SomaScan	KORA	cg14476101	-0.0254032	1	120255992	121050275	120952335	9	TRANS
2851-63	C5	SomaScan	KORA	cg10568944	-0.00694256	6	49430788	121050275	120952335	9	TRANS
2851-63	C5	SomaScan	KORA	cg10504390	0.0258527	18	12947632	121050275	120952335	9	TRANS
2851-63	C5	SomaScan	KORA	cg27512176	0.00039612	6	33158538	121050275	120952335	9	TRANS
2851-63	C5	SomaScan	KORA	cg18193127	0.0176478	12	131456574	121050275	120952335	9	TRANS
2851-63	C5	SomaScan	KORA	cg03799220	0.00218471	15	52860635	121050275	120952335	9	TRANS
2851-63	C5	SomaScan	KORA	cg10342016	-0.000635195	8	57802622	121050275	120952335	9	TRANS
2851-63	C5	SomaScan	KORA	cg26725076	-0.00695832	12	132569963	121050275	120952335	9	TRANS
2851-63	C5	SomaScan	KORA	cg12119032	-0.0134937	11	92881001	121050275	120952335	9	TRANS
2851-63	C5	SomaScan	KORA	cg01972316	-0.00824744	2	131601951	121050275	120952335	9	TRANS
2851-63	C5	SomaScan	KORA	cg12787950	-0.00639078	18	74610001	121050275	120952335	9	TRANS
2851-63	C5	SomaScan	KORA	cg17878351	-0.0157376	6	46016595	121050275	120952335	9	TRANS
2851-63	C5	SomaScan	KORA	cg11024682	0.0556717	17	17730094	121050275	120952335	9	TRANS
2851-63	C5	SomaScan	KORA	cg23288103	-0.00050088	2	242499464	121050275	120952335	9	TRANS
2851-63	C5	SomaScan	KORA	cg12974599	-0.0344433	22	46770195	121050275	120952335	9	TRANS
2851-63	C5	SomaScan	KORA	cg09561739	0.00359514	4	47916869	121050275	120952335	9	TRANS
2851-63	C5	SomaScan	KORA	cg00547018	-0.0127651	16	5121709	121050275	120952335	9	TRANS
2851-63	C5	SomaScan	KORA	cg15225091	-0.00338041	10	119001590	121050275	120952335	9	TRANS
2851-63	C5	SomaScan	KORA	cg24629545	0.00629027	7	2250050	121050275	120952335	9	TRANS
2851-63	C5	SomaScan	KORA	cg12760995	-0.00126082	1	10789713	121050275	120952335	9	TRANS
2851-63	C5	SomaScan	KORA	cg21720206	0.00592623	17	80877845	121050275	120952335	9	TRANS
2851-63	C5	SomaScan	KORA	cg20694241	-0.0101569	9	39132524	121050275	120952335	9	TRANS
2851-63	C5	SomaScan	KORA	cg25964213	0.00285679	8	17207503	121050275	120952335	9	TRANS
2851-63	C5	SomaScan	KORA	cg08995609	-0.00465638	11	66104115	121050275	120952335	9	TRANS
2851-63	C5	SomaScan	KORA	cg02711608	-0.0253197	19	47287964	121050275	120952335	9	TRANS
2851-63	C5	SomaScan	KORA	cg26301489	-0.0256165	17	45912037	121050275	120952335	9	TRANS
2851-63	C5	SomaScan	KORA	cg08548559	-0.00368142	22	31686097	121050275	120952335	9	TRANS
2851-63	C5	SomaScan	KORA	cg24418063	-0.000696301	12	7050950	121050275	120952335	9	TRANS
2851-63	C5	SomaScan	KORA	cg06500161	0.0377918	21	43656587	121050275	120952335	9	TRANS
2851-63	C5	SomaScan	KORA	cg20342907	0.0103396	11	117789566	121050275	120952335	9	TRANS
2851-63	C5	SomaScan	KORA	cg19850406	0.0139663	12	117174732	121050275	120952335	9	TRANS
2851-63	C5	SomaScan	KORA	cg02658668	0.00361787	5	121525513	121050275	120952335	9	TRANS
2851-63	C5	SomaScan	KORA	cg15806039	-0.0110548	6	15501269	121050275	120952335	9	TRANS
2851-63	C5	SomaScan	KORA	cg11502565	0.00478327	11	6978684	121050275	120952335	9	TRANS
2851-63	C5	SomaScan	KORA	cg03397031	-0.0118109	1	29189308	121050275	120952335	9	TRANS
2851-63	C5	SomaScan	KORA	cg16144934	-0.00252744	5	153570512	121050275	120952335	9	TRANS
2851-63	C5	SomaScan	KORA	cg24112010	-0.00697226	14	105975319	121050275	120952335	9	TRANS
2851-63	C5	SomaScan	KORA	cg24565620	-0.00469283	2	194026	121050275	120952335	9	TRANS
2851-63	C5	SomaScan	KORA	cg13905258	-0.0215296	2	45158117	121050275	120952335	9	TRANS
2851-63	C5	SomaScan	KORA	cg25424029	0.0037799	13	110840177	121050275	120952335	9	TRANS
2851-63	C5	SomaScan	KORA	cg06840243	0.00603576	17	74442338	121050275	120952335	9	TRANS
2851-63	C5	SomaScan	KORA	cg00176638	0.00239298	1	202778443	121050275	120952335	9	TRANS
2851-63	C5	SomaScan	KORA	cg13720865	0.00315119	9	138672837	121050275	120952335	9	TRANS
2851-63	C5	SomaScan	KORA	cg11991449	-0.00514834	13	112806734	121050275	120952335	9	TRANS
2851-63	C5	SomaScan	KORA	cg01934408	-0.00366046	1	6085799	121050275	120952335	9	TRANS
2851-63	C5	SomaScan	KORA	cg10140240	-0.000926715	17	76220672	121050275	120952335	9	TRANS
2851-63	C5	SomaScan	KORA	cg18426142	-0.00544492	12	51984246	121050275	120952335	9	TRANS
2851-63	C5	SomaScan	KORA	cg08111021	0.0217185	1	64239466	121050275	120952335	9	TRANS
2851-63	C5	SomaScan	KORA	cg24817003	0.0113197	3	9406960	121050275	120952335	9	TRANS
2851-63	C5	SomaScan	KORA	cg10776061	-0.000596291	19	12768390	121050275	120952335	9	TRANS
2851-63	C5	SomaScan	KORA	cg22933582	-0.0188014	5	72562402	121050275	120952335	9	TRANS
2851-63	C5	SomaScan	KORA	cg26341661	-0.0116533	15	52069389	121050275	120952335	9	TRANS
2851-63	C5	SomaScan	KORA	cg18252102	-0.0218055	13	98796790	121050275	120952335	9	TRANS
2851-63	C5	SomaScan	KORA	cg27374758	-0.00854273	3	121675259	121050275	120952335	9	TRANS
2851-63	C5	SomaScan	KORA	cg07048094	0.00319066	7	157409033	121050275	120952335	9	TRANS
2851-63	C5	SomaScan	KORA	cg15750102	0.0064792	4	107237686	121050275	120952335	9	TRANS
2851-63	C5	SomaScan	KORA	cg03307581	-0.00847951	5	132764798	121050275	120952335	9	TRANS
2851-63	C5	SomaScan	KORA	cg07292235	0.000205558	16	48844170	121050275	120952335	9	TRANS
2851-63	C5	SomaScan	KORA	cg18248869	0.0251374	15	28051072	121050275	120952335	9	TRANS
2851-63	C5	SomaScan	KORA	cg10728503	0.00336458	17	56294088	121050275	120952335	9	TRANS
2948-58	GHR	SomaScan	KORA	cg24145109	0.05747	1	5806951	42423439	42721878	5	TRANS
2948-58	GHR	SomaScan	KORA	cg06620654	0.119789	19	59086971	42423439	42721878	5	TRANS
2948-58	GHR	SomaScan	KORA	cg27245606	0.000803634	6	31549038	42423439	42721878	5	TRANS
2948-58	GHR	SomaScan	KORA	cg16723805	0.00401673	16	88516225	42423439	42721878	5	TRANS
2948-58	GHR	SomaScan	KORA	cg26697691	0.00769004	15	51235727	42423439	42721878	5	TRANS
2948-58	GHR	SomaScan	KORA	cg25125898	0.00787531	5	5422196	42423439	42721878	5	TRANS
2948-58	GHR	SomaScan	KORA	cg08573478	0.00425363	2	234378094	42423439	42721878	5	TRANS
2948-58	GHR	SomaScan	KORA	cg25509822	-0.00631254	17	42298664	42423439	42721878	5	TRANS
2948-58	GHR	SomaScan	KORA	cg00994936	0.0116191	19	1423902	42423439	42721878	5	TRANS
2948-58	GHR	SomaScan	KORA	cg05866062	-0.00174099	15	66678927	42423439	42721878	5	TRANS
2948-58	GHR	SomaScan	KORA	cg04247152	0.0131278	16	88590325	42423439	42721878	5	TRANS
2948-58	GHR	SomaScan	KORA	cg19538089	0.000254091	2	171673547	42423439	42721878	5	TRANS
2948-58	GHR	SomaScan	KORA	cg01836137	0.00134478	14	105167300	42423439	42721878	5	TRANS
2948-58	GHR	SomaScan	KORA	cg25580656	0.011879	14	104197160	42423439	42721878	5	TRANS
2948-58	GHR	SomaScan	KORA	cg19808825	0.0158738	1	55267006	42423439	42721878	5	TRANS
2948-58	GHR	SomaScan	KORA	cg23782734	0.0122589	10	3109041	42423439	42721878	5	TRANS
2948-58	GHR	SomaScan	KORA	cg21852757	0.00867633	3	179424616	42423439	42721878	5	TRANS
2948-58	GHR	SomaScan	KORA	cg07365960	-0.00889419	17	72848535	42423439	42721878	5	TRANS
2948-58	GHR	SomaScan	KORA	cg25974380	0.01086	14	105973925	42423439	42721878	5	TRANS
2948-58	GHR	SomaScan	KORA	cg04225785	-0.00843665	5	759544	42423439	42721878	5	TRANS
2948-58	GHR	SomaScan	KORA	cg15441629	-0.000624445	19	16582551	42423439	42721878	5	TRANS
2948-58	GHR	SomaScan	KORA	cg22353329	-0.00218633	17	77814357	42423439	42721878	5	TRANS
2948-58	GHR	SomaScan	KORA	cg10998611	-0.00533781	14	65879393	42423439	42721878	5	TRANS
2948-58	GHR	SomaScan	KORA	cg26209487	-0.00921083	8	56931739	42423439	42721878	5	TRANS
2948-58	GHR	SomaScan	KORA	cg10768682	0.000373951	22	21213158	42423439	42721878	5	TRANS
2948-58	GHR	SomaScan	KORA	cg11350208	0.00554701	2	133033202	42423439	42721878	5	TRANS
2948-58	GHR	SomaScan	KORA	cg04387175	0.00113494	16	88568629	42423439	42721878	5	TRANS
2948-58	GHR	SomaScan	KORA	cg15564619	-0.00575839	1	2163437	42423439	42721878	5	TRANS
2948-58	GHR	SomaScan	KORA	cg05035024	-0.00696101	17	7912378	42423439	42721878	5	TRANS
2948-58	GHR	SomaScan	KORA	cg05278442	-0.0166386	7	92861491	42423439	42721878	5	TRANS
2948-58	GHR	SomaScan	KORA	cg17942763	-0.0235016	1	2163472	42423439	42721878	5	TRANS
2948-58	GHR	SomaScan	KORA	cg01289544	-0.0010806	2	27887409	42423439	42721878	5	TRANS
2948-58	GHR	SomaScan	KORA	cg15728744	0.00189681	1	5917533	42423439	42721878	5	TRANS
2948-58	GHR	SomaScan	KORA	cg18281723	-0.0285516	4	187039516	42423439	42721878	5	TRANS
2948-58	GHR	SomaScan	KORA	cg08042643	-0.00883066	9	99540452	42423439	42721878	5	TRANS
2948-58	GHR	SomaScan	KORA	cg18666238	-0.00280151	1	78444712	42423439	42721878	5	TRANS
2948-58	GHR	SomaScan	KORA	cg11687966	0.0144778	1	204122321	42423439	42721878	5	TRANS
2948-58	GHR	SomaScan	KORA	cg21723486	0.000618384	3	189349323	42423439	42721878	5	TRANS
2948-58	GHR	SomaScan	KORA	cg10384373	-0.00608304	14	74111498	42423439	42721878	5	TRANS
2948-58	GHR	SomaScan	KORA	cg06043908	0.00491667	8	49467831	42423439	42721878	5	TRANS
2948-58	GHR	SomaScan	KORA	cg00863378	0.0398921	16	56549757	42423439	42721878	5	TRANS
2948-58	GHR	SomaScan	KORA	cg11890080	-0.0086967	12	123458847	42423439	42721878	5	TRANS
2948-58	GHR	SomaScan	KORA	cg19248982	0.00230976	3	49967462	42423439	42721878	5	TRANS
2948-58	GHR	SomaScan	KORA	cg17264541	-0.00991767	5	138743684	42423439	42721878	5	TRANS
2948-58	GHR	SomaScan	KORA	cg12968732	0.00277047	2	67788868	42423439	42721878	5	TRANS
2948-58	GHR	SomaScan	KORA	cg06180356	0.0224685	3	145879710	42423439	42721878	5	TRANS
2948-58	GHR	SomaScan	KORA	cg03444566	-0.000570832	2	241076777	42423439	42721878	5	TRANS
2948-58	GHR	SomaScan	KORA	cg06961539	0.0047654	5	55574642	42423439	42721878	5	TRANS
2948-58	GHR	SomaScan	KORA	cg19838043	0.0243365	14	104196038	42423439	42721878	5	TRANS
2948-58	GHR	SomaScan	KORA	cg07008193	0.00509546	11	46318527	42423439	42721878	5	TRANS
2948-58	GHR	SomaScan	KORA	cg01649064	0.000118292	14	105461334	42423439	42721878	5	TRANS
2948-58	GHR	SomaScan	KORA	cg03251287	0.000249504	19	50836910	42423439	42721878	5	TRANS
2948-58	GHR	SomaScan	KORA	cg17514528	0.0132586	1	11862907	42423439	42721878	5	TRANS
2948-58	GHR	SomaScan	KORA	cg07800658	0.0165975	13	111193758	42423439	42721878	5	TRANS
2948-58	GHR	SomaScan	KORA	cg00574958	-0.0200558	11	68607622	42423439	42721878	5	TRANS
2948-58	GHR	SomaScan	KORA	cg05816157	0.0180697	1	202935683	42423439	42721878	5	TRANS
2948-58	GHR	SomaScan	KORA	cg21694161	-0.0222694	17	35847200	42423439	42721878	5	TRANS
2948-58	GHR	SomaScan	KORA	cg16643422	0.0379962	8	13111435	42423439	42721878	5	TRANS
2948-58	GHR	SomaScan	KORA	cg26234644	0.000895905	17	10634427	42423439	42721878	5	TRANS
2948-58	GHR	SomaScan	KORA	cg03909478	-0.000188542	6	169958606	42423439	42721878	5	TRANS
2948-58	GHR	SomaScan	KORA	cg14056187	0.000927123	14	60954210	42423439	42721878	5	TRANS
2948-58	GHR	SomaScan	KORA	cg17713673	-0.00412291	12	46466053	42423439	42721878	5	TRANS
2948-58	GHR	SomaScan	KORA	cg04757345	-0.00167845	4	128918835	42423439	42721878	5	TRANS
2948-58	GHR	SomaScan	KORA	cg27627493	-0.00575911	15	63767360	42423439	42721878	5	TRANS
2948-58	GHR	SomaScan	KORA	cg05845030	-0.00134252	12	91573247	42423439	42721878	5	TRANS
2948-58	GHR	SomaScan	KORA	cg04113258	-0.00227057	16	17527041	42423439	42721878	5	TRANS
2948-58	GHR	SomaScan	KORA	cg02893348	-0.00261533	14	68745571	42423439	42721878	5	TRANS
2948-58	GHR	SomaScan	KORA	cg21929717	-0.00114779	5	68089821	42423439	42721878	5	TRANS
2948-58	GHR	SomaScan	KORA	cg19228683	0.00839235	11	91963266	42423439	42721878	5	TRANS
2948-58	GHR	SomaScan	KORA	cg11845620	0.00324549	17	37197733	42423439	42721878	5	TRANS
2948-58	GHR	SomaScan	KORA	cg24204406	0.00992949	2	86156243	42423439	42721878	5	TRANS
2948-58	GHR	SomaScan	KORA	cg07258627	0.00698822	20	4721683	42423439	42721878	5	TRANS
2948-58	GHR	SomaScan	KORA	cg25129765	-0.00400679	6	99872940	42423439	42721878	5	TRANS
2948-58	GHR	SomaScan	KORA	cg23598089	-0.00970484	1	203652079	42423439	42721878	5	TRANS
2948-58	GHR	SomaScan	KORA	cg02481307	0.00486103	4	1858883	42423439	42721878	5	TRANS
2948-58	GHR	SomaScan	KORA	cg16704703	-5.55486e-05	10	3509710	42423439	42721878	5	TRANS
2948-58	GHR	SomaScan	KORA	cg10302026	0.00752049	19	47249514	42423439	42721878	5	TRANS
2948-58	GHR	SomaScan	KORA	cg13044277	-0.00118703	15	76304546	42423439	42721878	5	TRANS
2948-58	GHR	SomaScan	KORA	cg05162256	0.000199209	4	53522945	42423439	42721878	5	TRANS
2948-58	GHR	SomaScan	KORA	cg26708797	-0.00103269	5	170906387	42423439	42721878	5	TRANS
2948-58	GHR	SomaScan	KORA	cg14709481	0.00450635	5	176325836	42423439	42721878	5	TRANS
2948-58	GHR	SomaScan	KORA	cg25094735	0.000678396	19	50848024	42423439	42721878	5	TRANS
2948-58	GHR	SomaScan	KORA	cg25177139	0.0105263	4	87770089	42423439	42721878	5	TRANS
2948-58	GHR	SomaScan	KORA	cg04292993	0.0042079	7	73894730	42423439	42721878	5	TRANS
2948-58	GHR	SomaScan	KORA	cg14476101	-0.0548936	1	120255992	42423439	42721878	5	TRANS
2948-58	GHR	SomaScan	KORA	cg02293668	0.0142293	1	154539974	42423439	42721878	5	TRANS
2948-58	GHR	SomaScan	KORA	cg00108715	0.00123293	3	52565015	42423439	42721878	5	TRANS
2948-58	GHR	SomaScan	KORA	cg01408881	0.000619975	12	65566249	42423439	42721878	5	TRANS
2948-58	GHR	SomaScan	KORA	cg17578330	0.00155826	17	12310544	42423439	42721878	5	TRANS
2948-58	GHR	SomaScan	KORA	cg23452119	-0.000976706	14	105290118	42423439	42721878	5	TRANS
2948-58	GHR	SomaScan	KORA	cg06156157	-0.00348209	1	47799348	42423439	42721878	5	TRANS
2948-58	GHR	SomaScan	KORA	cg06500161	0.0718887	21	43656587	42423439	42721878	5	TRANS
2948-58	GHR	SomaScan	KORA	cg18509239	-0.00518495	3	151176434	42423439	42721878	5	TRANS
2948-58	GHR	SomaScan	KORA	cg00113554	-0.00879793	17	47840835	42423439	42721878	5	TRANS
2948-58	GHR	SomaScan	KORA	cg01444797	-0.0123591	1	2556817	42423439	42721878	5	TRANS
2948-58	GHR	SomaScan	KORA	cg14508633	0.00620403	7	103082905	42423439	42721878	5	TRANS
2948-58	GHR	SomaScan	KORA	cg19458497	0.00499669	11	63403371	42423439	42721878	5	TRANS
2948-58	GHR	SomaScan	KORA	cg13188263	-0.013839	1	160517539	42423439	42721878	5	TRANS
2948-58	GHR	SomaScan	KORA	cg18984103	0.00917706	14	104163025	42423439	42721878	5	TRANS
2948-58	GHR	SomaScan	KORA	cg05415146	-0.00230144	11	42429192	42423439	42721878	5	TRANS
2948-58	GHR	SomaScan	KORA	cg16578636	-0.00425696	10	92987457	42423439	42721878	5	TRANS
2948-58	GHR	SomaScan	KORA	cg17822807	0.00367087	7	31107864	42423439	42721878	5	TRANS
2948-58	GHR	SomaScan	KORA	cg22620689	-0.00228189	11	123295944	42423439	42721878	5	TRANS
2948-58	GHR	SomaScan	KORA	cg22764374	-0.000282097	12	12163421	42423439	42721878	5	TRANS
2948-58	GHR	SomaScan	KORA	cg05769505	-0.0133085	7	40819169	42423439	42721878	5	TRANS
2948-58	GHR	SomaScan	KORA	cg15337107	0.0051185	11	41414012	42423439	42721878	5	TRANS
2948-58	GHR	SomaScan	KORA	cg15227231	-0.00127191	6	170467425	42423439	42721878	5	TRANS
2948-58	GHR	SomaScan	KORA	cg01971676	0.00573679	7	43151877	42423439	42721878	5	TRANS
2950-57	IGFBP4	SomaScan	KORA	cg03264550	0.0100008	20	57465448	40443450	40457725	17	TRANS
2950-57	IGFBP4	SomaScan	KORA	cg03310838	-0.000738396	16	88545042	40443450	40457725	17	TRANS
2950-57	IGFBP4	SomaScan	KORA	cg23306063	-0.0137744	19	10463879	40443450	40457725	17	TRANS
2950-57	IGFBP4	SomaScan	KORA	cg19774624	-0.000585138	17	42201019	40443450	40457725	17	CIS
2950-57	IGFBP4	SomaScan	KORA	cg14699126	0.00248433	11	65101156	40443450	40457725	17	TRANS
2950-57	IGFBP4	SomaScan	KORA	cg22877570	-0.00666469	3	171175950	40443450	40457725	17	TRANS
2950-57	IGFBP4	SomaScan	KORA	cg10599035	-0.00206458	6	42981724	40443450	40457725	17	TRANS
2950-57	IGFBP4	SomaScan	KORA	cg01256539	-0.0103224	5	119802022	40443450	40457725	17	TRANS
2950-57	IGFBP4	SomaScan	KORA	cg19551573	0.00242669	12	56498328	40443450	40457725	17	TRANS
2950-57	IGFBP4	SomaScan	KORA	cg12074585	-0.000196773	12	7280958	40443450	40457725	17	TRANS
2950-57	IGFBP4	SomaScan	KORA	cg26257814	0.00769693	19	50553708	40443450	40457725	17	TRANS
2950-57	IGFBP4	SomaScan	KORA	cg05059613	-0.008639	2	224821947	40443450	40457725	17	TRANS
2950-57	IGFBP4	SomaScan	KORA	cg24651265	-0.00113058	10	6962135	40443450	40457725	17	TRANS
2950-57	IGFBP4	SomaScan	KORA	cg25983380	0.00695099	20	57465439	40443450	40457725	17	TRANS
2950-57	IGFBP4	SomaScan	KORA	cg23517208	0.000709536	5	72530472	40443450	40457725	17	TRANS
2950-57	IGFBP4	SomaScan	KORA	cg07583667	-0.00155649	19	50528685	40443450	40457725	17	TRANS
2950-57	IGFBP4	SomaScan	KORA	cg15658344	-0.00720389	12	50720139	40443450	40457725	17	TRANS
2950-57	IGFBP4	SomaScan	KORA	cg17969123	-0.0159982	19	18745971	40443450	40457725	17	TRANS
2950-57	IGFBP4	SomaScan	KORA	cg15815084	-0.0072804	17	54912870	40443450	40457725	17	TRANS
2950-57	IGFBP4	SomaScan	KORA	cg12584355	0.000428652	7	100773851	40443450	40457725	17	TRANS
2950-57	IGFBP4	SomaScan	KORA	cg02790691	-0.00226013	18	32289550	40443450	40457725	17	TRANS
2950-57	IGFBP4	SomaScan	KORA	cg14116416	0.00471453	9	19231381	40443450	40457725	17	TRANS
2950-57	IGFBP4	SomaScan	KORA	cg01588592	6.58363e-05	1	157069325	40443450	40457725	17	TRANS
2950-57	IGFBP4	SomaScan	KORA	cg00460818	0.00720547	14	105453021	40443450	40457725	17	TRANS
2950-57	IGFBP4	SomaScan	KORA	cg16931969	-0.000378066	4	113985495	40443450	40457725	17	TRANS
2950-57	IGFBP4	SomaScan	KORA	cg26200598	0.0067442	18	8717113	40443450	40457725	17	TRANS
2950-57	IGFBP4	SomaScan	KORA	cg06302803	-0.00220224	5	138609953	40443450	40457725	17	TRANS
2950-57	IGFBP4	SomaScan	KORA	cg07869023	-0.000218679	20	17212376	40443450	40457725	17	TRANS
2950-57	IGFBP4	SomaScan	KORA	cg15342087	-0.0311716	6	30720209	40443450	40457725	17	TRANS
2950-57	IGFBP4	SomaScan	KORA	cg14643075	0.00736889	5	176755449	40443450	40457725	17	TRANS
2950-57	IGFBP4	SomaScan	KORA	cg21573911	-0.0166523	19	46733746	40443450	40457725	17	TRANS
2950-57	IGFBP4	SomaScan	KORA	cg16677191	-0.00185929	5	95159423	40443450	40457725	17	TRANS
2950-57	IGFBP4	SomaScan	KORA	cg26825341	-0.0240754	6	170576799	40443450	40457725	17	TRANS
2950-57	IGFBP4	SomaScan	KORA	cg18118033	0.00119232	1	26686703	40443450	40457725	17	TRANS
2950-57	IGFBP4	SomaScan	KORA	cg12806681	-0.00279986	5	368394	40443450	40457725	17	TRANS
2950-57	IGFBP4	SomaScan	KORA	cg08356572	0.0142323	6	28891055	40443450	40457725	17	TRANS
2950-57	IGFBP4	SomaScan	KORA	cg02795546	0.00257829	1	247697875	40443450	40457725	17	TRANS
2950-57	IGFBP4	SomaScan	KORA	cg16729283	0.00159929	11	134681766	40443450	40457725	17	TRANS
2950-57	IGFBP4	SomaScan	KORA	cg12773030	-0.00951619	7	30543611	40443450	40457725	17	TRANS
2950-57	IGFBP4	SomaScan	KORA	cg18315680	0.000943362	1	154833117	40443450	40457725	17	TRANS
2950-57	IGFBP4	SomaScan	KORA	cg09256832	0.0140297	1	9382878	40443450	40457725	17	TRANS
2950-57	IGFBP4	SomaScan	KORA	cg03294961	0.0315783	20	31594014	40443450	40457725	17	TRANS
2950-57	IGFBP4	SomaScan	KORA	cg07339236	-0.0180924	20	50312490	40443450	40457725	17	TRANS
2950-57	IGFBP4	SomaScan	KORA	cg11095027	0.0291263	11	1297066	40443450	40457725	17	TRANS
2950-57	IGFBP4	SomaScan	KORA	cg04296321	0.00264216	6	158499135	40443450	40457725	17	TRANS
2950-57	IGFBP4	SomaScan	KORA	cg01571916	-0.000152948	11	44881716	40443450	40457725	17	TRANS
2950-57	IGFBP4	SomaScan	KORA	cg06690548	-0.0760734	4	139162808	40443450	40457725	17	TRANS
2950-57	IGFBP4	SomaScan	KORA	cg01459453	-0.0181949	1	169599212	40443450	40457725	17	TRANS
2950-57	IGFBP4	SomaScan	KORA	cg07504977	0.0372436	10	102131012	40443450	40457725	17	TRANS
2950-57	IGFBP4	SomaScan	KORA	cg16648911	-0.00536701	10	131340563	40443450	40457725	17	TRANS
2950-57	IGFBP4	SomaScan	KORA	cg08016363	-0.00217094	17	21118577	40443450	40457725	17	TRANS
2950-57	IGFBP4	SomaScan	KORA	cg01217815	0.00342287	12	23192600	40443450	40457725	17	TRANS
2950-57	IGFBP4	SomaScan	KORA	cg10241823	0.00759436	17	841205	40443450	40457725	17	TRANS
2950-57	IGFBP4	SomaScan	KORA	cg19774288	0.0143769	19	48385028	40443450	40457725	17	TRANS
2950-57	IGFBP4	SomaScan	KORA	cg11024682	0.0111779	17	17730094	40443450	40457725	17	TRANS
2950-57	IGFBP4	SomaScan	KORA	cg11691093	-0.0052989	22	36727373	40443450	40457725	17	TRANS
2950-57	IGFBP4	SomaScan	KORA	cg19784816	0.00528623	3	52812520	40443450	40457725	17	TRANS
2950-57	IGFBP4	SomaScan	KORA	cg25617058	-0.0143264	5	1356784	40443450	40457725	17	TRANS
2950-57	IGFBP4	SomaScan	KORA	cg06711259	-0.00554932	22	39095898	40443450	40457725	17	TRANS
2950-57	IGFBP4	SomaScan	KORA	cg08619528	0.00645848	6	126385363	40443450	40457725	17	TRANS
2950-57	IGFBP4	SomaScan	KORA	cg10433043	0.00389167	6	152432725	40443450	40457725	17	TRANS
2950-57	IGFBP4	SomaScan	KORA	cg24313249	-0.00260305	13	113992137	40443450	40457725	17	TRANS
2950-57	IGFBP4	SomaScan	KORA	cg02060584	-0.000556221	4	113970739	40443450	40457725	17	TRANS
2950-57	IGFBP4	SomaScan	KORA	cg08976163	0.0188221	18	44676764	40443450	40457725	17	TRANS
2950-57	IGFBP4	SomaScan	KORA	cg25246084	-0.0111751	19	4971487	40443450	40457725	17	TRANS
2950-57	IGFBP4	SomaScan	KORA	cg20079193	0.00838498	5	892529	40443450	40457725	17	TRANS
2950-57	IGFBP4	SomaScan	KORA	cg21221540	0.00204814	3	25946096	40443450	40457725	17	TRANS
2950-57	IGFBP4	SomaScan	KORA	cg13684444	-0.00111633	11	63753508	40443450	40457725	17	TRANS
2950-57	IGFBP4	SomaScan	KORA	cg25718365	0.0188756	2	38659286	40443450	40457725	17	TRANS
2950-57	IGFBP4	SomaScan	KORA	cg05400732	0.00667005	3	57032141	40443450	40457725	17	TRANS
2950-57	IGFBP4	SomaScan	KORA	cg12301744	0.000448297	11	107328559	40443450	40457725	17	TRANS
2950-57	IGFBP4	SomaScan	KORA	cg19918208	-0.0116253	6	28828364	40443450	40457725	17	TRANS
2966-65	CLEC11A	SomaScan	KORA	cg22317104	0.00734475	19	7294087	50723364	50725718	19	TRANS
2966-65	CLEC11A	SomaScan	KORA	cg10634598	0.0017642	11	45740552	50723364	50725718	19	TRANS
2966-65	CLEC11A	SomaScan	KORA	cg11501931	-0.00246876	10	51572570	50723364	50725718	19	TRANS
2966-65	CLEC11A	SomaScan	KORA	cg12536809	0.0121375	17	72852514	50723364	50725718	19	TRANS
2966-65	CLEC11A	SomaScan	KORA	cg16770697	0.00121508	10	133953935	50723364	50725718	19	TRANS
2966-65	CLEC11A	SomaScan	KORA	cg26111887	0.00587075	13	20866756	50723364	50725718	19	TRANS
2966-65	CLEC11A	SomaScan	KORA	cg14954491	0.00648315	17	78449647	50723364	50725718	19	TRANS
2966-65	CLEC11A	SomaScan	KORA	cg06755373	-0.00778603	16	3225493	50723364	50725718	19	TRANS
2966-65	CLEC11A	SomaScan	KORA	cg04247152	-0.0023134	16	88590325	50723364	50725718	19	TRANS
2966-65	CLEC11A	SomaScan	KORA	cg11383802	-0.0285779	11	71145904	50723364	50725718	19	TRANS
2966-65	CLEC11A	SomaScan	KORA	cg16701523	-0.00140483	2	235943659	50723364	50725718	19	TRANS
2966-65	CLEC11A	SomaScan	KORA	cg08414676	-0.000262384	15	45314943	50723364	50725718	19	TRANS
2966-65	CLEC11A	SomaScan	KORA	cg09453752	0.00444576	5	126366464	50723364	50725718	19	TRANS
2966-65	CLEC11A	SomaScan	KORA	cg00059053	0.000651155	12	3602162	50723364	50725718	19	TRANS
2966-65	CLEC11A	SomaScan	KORA	cg01974091	-0.0113118	14	100625027	50723364	50725718	19	TRANS
2966-65	CLEC11A	SomaScan	KORA	cg17174814	0.00189441	15	67228986	50723364	50725718	19	TRANS
2966-65	CLEC11A	SomaScan	KORA	cg24790297	-0.0483746	19	51226357	50723364	50725718	19	CIS
2966-65	CLEC11A	SomaScan	KORA	cg12201943	-0.00422676	6	166266600	50723364	50725718	19	TRANS
2966-65	CLEC11A	SomaScan	KORA	cg05380522	0.00739724	12	53473279	50723364	50725718	19	TRANS
2966-65	CLEC11A	SomaScan	KORA	cg14328457	0.00408106	17	37381475	50723364	50725718	19	TRANS
2966-65	CLEC11A	SomaScan	KORA	cg24739849	-3.85827e-05	10	104781300	50723364	50725718	19	TRANS
2966-65	CLEC11A	SomaScan	KORA	cg02723850	0.0184599	17	6918181	50723364	50725718	19	TRANS
2966-65	CLEC11A	SomaScan	KORA	cg16651537	-0.110439	19	51226536	50723364	50725718	19	CIS
2966-65	CLEC11A	SomaScan	KORA	cg08472459	-3.885e-06	1	57297710	50723364	50725718	19	TRANS
2966-65	CLEC11A	SomaScan	KORA	cg14397231	-0.00281697	4	124940041	50723364	50725718	19	TRANS
2966-65	CLEC11A	SomaScan	KORA	cg07370221	0.00193421	12	132904796	50723364	50725718	19	TRANS
2966-65	CLEC11A	SomaScan	KORA	cg15807855	-0.000963949	7	157724072	50723364	50725718	19	TRANS
2966-65	CLEC11A	SomaScan	KORA	cg06947430	0.012566	19	51228937	50723364	50725718	19	CIS
2966-65	CLEC11A	SomaScan	KORA	cg00178427	-0.00651831	1	42500551	50723364	50725718	19	TRANS
2966-65	CLEC11A	SomaScan	KORA	cg01768960	0.00498025	8	41505625	50723364	50725718	19	TRANS
2966-65	CLEC11A	SomaScan	KORA	cg08678044	-0.0176753	19	51226849	50723364	50725718	19	CIS
2966-65	CLEC11A	SomaScan	KORA	cg05527430	0.00512519	4	175444181	50723364	50725718	19	TRANS
2966-65	CLEC11A	SomaScan	KORA	cg11385631	0.00313766	8	6321006	50723364	50725718	19	TRANS
2966-65	CLEC11A	SomaScan	KORA	cg00621838	0.0102602	15	43826637	50723364	50725718	19	TRANS
2966-65	CLEC11A	SomaScan	KORA	cg21664281	-0.0130492	3	193561005	50723364	50725718	19	TRANS
2966-65	CLEC11A	SomaScan	KORA	cg19755435	0.00432423	14	88473001	50723364	50725718	19	TRANS
2966-65	CLEC11A	SomaScan	KORA	cg27259408	-0.00609712	19	10427154	50723364	50725718	19	TRANS
2966-65	CLEC11A	SomaScan	KORA	cg16602500	7.7857e-05	1	52889575	50723364	50725718	19	TRANS
2966-65	CLEC11A	SomaScan	KORA	cg05881068	0.00586554	10	131660591	50723364	50725718	19	TRANS
2966-65	CLEC11A	SomaScan	KORA	cg05976840	-0.00199479	16	67189804	50723364	50725718	19	TRANS
2966-65	CLEC11A	SomaScan	KORA	cg27098804	-0.0189509	11	60776124	50723364	50725718	19	TRANS
2966-65	CLEC11A	SomaScan	KORA	cg22845236	-0.0115346	5	140255449	50723364	50725718	19	TRANS
2966-65	CLEC11A	SomaScan	KORA	cg12418535	-0.00528897	2	119607192	50723364	50725718	19	TRANS
2966-65	CLEC11A	SomaScan	KORA	cg15182215	-0.00818944	10	134875720	50723364	50725718	19	TRANS
2966-65	CLEC11A	SomaScan	KORA	cg25902229	0.01406	17	78864088	50723364	50725718	19	TRANS
2966-65	CLEC11A	SomaScan	KORA	cg08724254	-0.0172631	10	72201741	50723364	50725718	19	TRANS
2966-65	CLEC11A	SomaScan	KORA	cg16557178	0.0116849	17	46804309	50723364	50725718	19	TRANS
2966-65	CLEC11A	SomaScan	KORA	cg14796107	-0.00164363	7	75192547	50723364	50725718	19	TRANS
2966-65	CLEC11A	SomaScan	KORA	cg24401044	0.0142715	2	239982465	50723364	50725718	19	TRANS
2966-65	CLEC11A	SomaScan	KORA	cg18457110	0.00256702	19	8402642	50723364	50725718	19	TRANS
2966-65	CLEC11A	SomaScan	KORA	cg07954316	0.00245236	11	67287567	50723364	50725718	19	TRANS
2966-65	CLEC11A	SomaScan	KORA	cg05040219	0.0164492	1	54200115	50723364	50725718	19	TRANS
2966-65	CLEC11A	SomaScan	KORA	cg00248310	-0.00452759	3	101292685	50723364	50725718	19	TRANS
2966-65	CLEC11A	SomaScan	KORA	cg02691360	-0.0192415	16	56396075	50723364	50725718	19	TRANS
2966-65	CLEC11A	SomaScan	KORA	cg07137983	-0.00156821	6	135709029	50723364	50725718	19	TRANS
2966-65	CLEC11A	SomaScan	KORA	cg16604086	0.00300302	12	113860443	50723364	50725718	19	TRANS
2966-65	CLEC11A	SomaScan	KORA	cg17508941	-0.00340015	7	19183280	50723364	50725718	19	TRANS
2966-65	CLEC11A	SomaScan	KORA	cg25309343	-0.0234748	19	51226207	50723364	50725718	19	CIS
2966-65	CLEC11A	SomaScan	KORA	cg09978353	-0.0111658	17	72759282	50723364	50725718	19	TRANS
2966-65	CLEC11A	SomaScan	KORA	cg18465834	0.0152376	22	38809256	50723364	50725718	19	TRANS
2966-65	CLEC11A	SomaScan	KORA	cg16097955	0.00651189	6	4905378	50723364	50725718	19	TRANS
2966-65	CLEC11A	SomaScan	KORA	cg20389847	-0.0118311	8	119043482	50723364	50725718	19	TRANS
2966-65	CLEC11A	SomaScan	KORA	cg02986791	0.0082589	19	1062178	50723364	50725718	19	TRANS
2966-65	CLEC11A	SomaScan	KORA	cg15000222	-0.0174107	12	117486164	50723364	50725718	19	TRANS
2966-65	CLEC11A	SomaScan	KORA	cg17038235	-0.00270975	5	172370524	50723364	50725718	19	TRANS
2966-65	CLEC11A	SomaScan	KORA	cg20566897	0.00487808	11	313527	50723364	50725718	19	TRANS
2966-65	CLEC11A	SomaScan	KORA	cg23031135	-0.00374618	11	68779553	50723364	50725718	19	TRANS
2966-65	CLEC11A	SomaScan	KORA	cg08893853	-0.0072058	1	151701251	50723364	50725718	19	TRANS
2966-65	CLEC11A	SomaScan	KORA	cg04539111	-0.000848891	16	67997858	50723364	50725718	19	TRANS
2966-65	CLEC11A	SomaScan	KORA	cg24676120	-0.00137472	12	102821557	50723364	50725718	19	TRANS
2966-65	CLEC11A	SomaScan	KORA	cg10773601	-0.0905726	19	51226046	50723364	50725718	19	CIS
2966-65	CLEC11A	SomaScan	KORA	cg23404351	0.003404	5	21751337	50723364	50725718	19	TRANS
2966-65	CLEC11A	SomaScan	KORA	cg12423733	-0.0025156	6	29454623	50723364	50725718	19	TRANS
2966-65	CLEC11A	SomaScan	KORA	cg09567197	0.0083674	1	244218537	50723364	50725718	19	TRANS
2966-65	CLEC11A	SomaScan	KORA	cg06890028	-0.00463042	1	44137602	50723364	50725718	19	TRANS
2966-65	CLEC11A	SomaScan	KORA	cg21861305	0.0159605	1	117295987	50723364	50725718	19	TRANS
2966-65	CLEC11A	SomaScan	KORA	cg26507353	0.0062039	10	30843032	50723364	50725718	19	TRANS
2966-65	CLEC11A	SomaScan	KORA	cg07909178	-0.000157513	17	74073876	50723364	50725718	19	TRANS
2966-65	CLEC11A	SomaScan	KORA	cg07751039	0.0269469	8	110342871	50723364	50725718	19	TRANS
2966-65	CLEC11A	SomaScan	KORA	cg22536775	-0.0329069	1	1851439	50723364	50725718	19	TRANS
2966-65	CLEC11A	SomaScan	KORA	cg24693478	0.0035411	1	208218000	50723364	50725718	19	TRANS
2966-65	CLEC11A	SomaScan	KORA	cg10626063	-0.0102809	19	38881032	50723364	50725718	19	TRANS
2967-8	VCAM1	SomaScan	KORA	cg04258133	-0.0062796	11	1953661	100719742	100739045	1	TRANS
2967-8	VCAM1	SomaScan	KORA	cg02741521	0.00142184	3	9745610	100719742	100739045	1	TRANS
2967-8	VCAM1	SomaScan	KORA	cg16419235	0.0261708	8	57360613	100719742	100739045	1	TRANS
2967-8	VCAM1	SomaScan	KORA	cg02973171	0.00494663	11	82443614	100719742	100739045	1	TRANS
2967-8	VCAM1	SomaScan	KORA	cg11930554	0.000468194	4	74809912	100719742	100739045	1	TRANS
2967-8	VCAM1	SomaScan	KORA	cg07839457	-0.0510843	16	57023022	100719742	100739045	1	TRANS
2967-8	VCAM1	SomaScan	KORA	cg20320946	-0.000456241	11	66838046	100719742	100739045	1	TRANS
2967-8	VCAM1	SomaScan	KORA	cg05260733	-0.0021527	2	37420094	100719742	100739045	1	TRANS
2967-8	VCAM1	SomaScan	KORA	cg00439658	0.00182449	17	72848669	100719742	100739045	1	TRANS
2967-8	VCAM1	SomaScan	KORA	cg17737621	0.00360911	20	21372480	100719742	100739045	1	TRANS
2967-8	VCAM1	SomaScan	KORA	cg06728103	0.0135493	12	93930699	100719742	100739045	1	TRANS
2967-8	VCAM1	SomaScan	KORA	cg01027739	0.00322919	9	131842738	100719742	100739045	1	TRANS
2967-8	VCAM1	SomaScan	KORA	cg03569876	0.00301457	5	148908014	100719742	100739045	1	TRANS
2967-8	VCAM1	SomaScan	KORA	cg05036615	0.0215332	7	77552789	100719742	100739045	1	TRANS
2967-8	VCAM1	SomaScan	KORA	cg21226253	-0.00235665	9	34661706	100719742	100739045	1	TRANS
2967-8	VCAM1	SomaScan	KORA	cg18599996	-0.00238023	3	148708821	100719742	100739045	1	TRANS
2967-8	VCAM1	SomaScan	KORA	cg17280398	-0.00151487	3	138478195	100719742	100739045	1	TRANS
2967-8	VCAM1	SomaScan	KORA	cg05168141	-0.0228105	15	26231836	100719742	100739045	1	TRANS
2967-8	VCAM1	SomaScan	KORA	cg06685437	0.00114428	17	17669973	100719742	100739045	1	TRANS
2967-8	VCAM1	SomaScan	KORA	cg01469027	0.00286135	17	46714130	100719742	100739045	1	TRANS
2967-8	VCAM1	SomaScan	KORA	cg18335796	0.0102266	8	91094472	100719742	100739045	1	TRANS
2967-8	VCAM1	SomaScan	KORA	cg13772414	0.00390494	2	222383060	100719742	100739045	1	TRANS
2967-8	VCAM1	SomaScan	KORA	cg21572722	0.0181058	6	11044894	100719742	100739045	1	TRANS
2967-8	VCAM1	SomaScan	KORA	cg24405716	0.0133492	15	31280513	100719742	100739045	1	TRANS
2967-8	VCAM1	SomaScan	KORA	cg21967368	-0.0158931	2	211422328	100719742	100739045	1	TRANS
2967-8	VCAM1	SomaScan	KORA	cg27209729	-0.00872837	11	64428925	100719742	100739045	1	TRANS
2967-8	VCAM1	SomaScan	KORA	cg04327247	-0.00412336	9	100564659	100719742	100739045	1	TRANS
2967-8	VCAM1	SomaScan	KORA	cg00059225	0.00634272	5	151304357	100719742	100739045	1	TRANS
2967-8	VCAM1	SomaScan	KORA	cg04487855	0.00256321	15	30261393	100719742	100739045	1	TRANS
2967-8	VCAM1	SomaScan	KORA	cg02030270	-0.00475903	15	84215725	100719742	100739045	1	TRANS
2967-8	VCAM1	SomaScan	KORA	cg00542975	0.00796341	2	122392291	100719742	100739045	1	TRANS
2967-8	VCAM1	SomaScan	KORA	cg11835347	0.00458567	1	113248232	100719742	100739045	1	TRANS
2982-82	LGALS4	SomaScan	KORA	cg25604739	0.00805992	19	13858565	38812981	38801671	19	TRANS
2982-82	LGALS4	SomaScan	KORA	cg02341038	0.0369668	11	119020138	38812981	38801671	19	TRANS
2982-82	LGALS4	SomaScan	KORA	cg08648346	0.0223092	2	95825642	38812981	38801671	19	TRANS
2982-82	LGALS4	SomaScan	KORA	cg09782300	0.131603	19	14640092	38812981	38801671	19	TRANS
2982-82	LGALS4	SomaScan	KORA	cg01244034	0.00606211	16	25078253	38812981	38801671	19	TRANS
2982-82	LGALS4	SomaScan	KORA	cg15863924	0.0305058	20	3388269	38812981	38801671	19	TRANS
2982-82	LGALS4	SomaScan	KORA	cg02461391	0.00296941	16	80838265	38812981	38801671	19	TRANS
2982-82	LGALS4	SomaScan	KORA	cg05477457	0.0082612	4	169799308	38812981	38801671	19	TRANS
2982-82	LGALS4	SomaScan	KORA	cg02693438	-0.00627607	12	38557136	38812981	38801671	19	TRANS
2982-82	LGALS4	SomaScan	KORA	cg10857807	0.0289553	7	2272392	38812981	38801671	19	TRANS
2982-82	LGALS4	SomaScan	KORA	cg08845510	0.0115498	1	9884029	38812981	38801671	19	TRANS
2982-82	LGALS4	SomaScan	KORA	cg06201907	0.0155641	1	113249974	38812981	38801671	19	TRANS
2982-82	LGALS4	SomaScan	KORA	cg09421092	0.0364432	17	27047122	38812981	38801671	19	TRANS
2982-82	LGALS4	SomaScan	KORA	cg11944462	-0.0141679	10	102642752	38812981	38801671	19	TRANS
2982-82	LGALS4	SomaScan	KORA	cg08977266	0.00013428	5	131826611	38812981	38801671	19	TRANS
2982-82	LGALS4	SomaScan	KORA	cg21226534	0.00846103	9	35162151	38812981	38801671	19	TRANS
2982-82	LGALS4	SomaScan	KORA	cg20217649	-0.00138251	8	67835351	38812981	38801671	19	TRANS
2982-82	LGALS4	SomaScan	KORA	cg16589299	0.00866687	10	131758786	38812981	38801671	19	TRANS
2982-82	LGALS4	SomaScan	KORA	cg22739477	0.0182218	2	208394512	38812981	38801671	19	TRANS
2982-82	LGALS4	SomaScan	KORA	cg17025142	0.00805353	5	99871651	38812981	38801671	19	TRANS
2982-82	LGALS4	SomaScan	KORA	cg21587477	-0.0460256	7	128696983	38812981	38801671	19	TRANS
2982-82	LGALS4	SomaScan	KORA	cg07882535	-0.0672674	11	2445392	38812981	38801671	19	TRANS
2982-82	LGALS4	SomaScan	KORA	cg19610615	-0.00727344	14	78446340	38812981	38801671	19	TRANS
2982-82	LGALS4	SomaScan	KORA	cg24681499	0.00293588	1	42706997	38812981	38801671	19	TRANS
2982-82	LGALS4	SomaScan	KORA	cg06217827	0.000750432	11	66243374	38812981	38801671	19	TRANS
2982-82	LGALS4	SomaScan	KORA	cg15476875	-0.00463754	12	101347953	38812981	38801671	19	TRANS
2982-82	LGALS4	SomaScan	KORA	cg19670290	-0.00573348	15	91477210	38812981	38801671	19	TRANS
2982-82	LGALS4	SomaScan	KORA	cg20952257	-0.00826544	5	171074407	38812981	38801671	19	TRANS
2982-82	LGALS4	SomaScan	KORA	cg15369633	0.000481299	6	31744398	38812981	38801671	19	TRANS
2982-82	LGALS4	SomaScan	KORA	cg26126740	0.00327874	20	42574332	38812981	38801671	19	TRANS
2982-82	LGALS4	SomaScan	KORA	cg03661054	-0.0220849	2	3281330	38812981	38801671	19	TRANS
2982-82	LGALS4	SomaScan	KORA	cg07626482	-0.0182037	19	47289503	38812981	38801671	19	CIS
2982-82	LGALS4	SomaScan	KORA	cg15366301	0.000563587	5	176274004	38812981	38801671	19	TRANS
2982-82	LGALS4	SomaScan	KORA	cg00574958	-0.00333306	11	68607622	38812981	38801671	19	TRANS
2982-82	LGALS4	SomaScan	KORA	cg16054275	-0.00461865	1	169556022	38812981	38801671	19	TRANS
2982-82	LGALS4	SomaScan	KORA	cg01853541	-0.0397479	4	949314	38812981	38801671	19	TRANS
2982-82	LGALS4	SomaScan	KORA	cg25256723	-0.0110213	1	169555944	38812981	38801671	19	TRANS
2982-82	LGALS4	SomaScan	KORA	cg20211134	-0.00130855	8	138979023	38812981	38801671	19	TRANS
2982-82	LGALS4	SomaScan	KORA	cg00214970	-0.0107574	2	229047701	38812981	38801671	19	TRANS
2982-82	LGALS4	SomaScan	KORA	cg06690548	-0.0446225	4	139162808	38812981	38801671	19	TRANS
2982-82	LGALS4	SomaScan	KORA	cg09725147	-0.00283652	5	108745819	38812981	38801671	19	TRANS
2982-82	LGALS4	SomaScan	KORA	cg21027282	0.00155912	14	68816721	38812981	38801671	19	TRANS
2982-82	LGALS4	SomaScan	KORA	cg09936218	-0.00752799	7	38331871	38812981	38801671	19	TRANS
2982-82	LGALS4	SomaScan	KORA	cg03984502	0.0277974	1	151805661	38812981	38801671	19	TRANS
2982-82	LGALS4	SomaScan	KORA	cg01970336	-0.00153104	1	51986254	38812981	38801671	19	TRANS
2982-82	LGALS4	SomaScan	KORA	cg22486214	-0.00100133	17	78930466	38812981	38801671	19	TRANS
2982-82	LGALS4	SomaScan	KORA	cg00815399	0.012943	7	158750607	38812981	38801671	19	TRANS
2982-82	LGALS4	SomaScan	KORA	cg09397997	-0.0196362	13	114827394	38812981	38801671	19	TRANS
2982-82	LGALS4	SomaScan	KORA	cg24403644	0.0146886	20	42574624	38812981	38801671	19	TRANS
2982-82	LGALS4	SomaScan	KORA	cg11024682	0.0265153	17	17730094	38812981	38801671	19	TRANS
2982-82	LGALS4	SomaScan	KORA	cg00372692	-0.0037687	2	204800409	38812981	38801671	19	TRANS
2982-82	LGALS4	SomaScan	KORA	cg02711608	-0.000770673	19	47287964	38812981	38801671	19	CIS
2982-82	LGALS4	SomaScan	KORA	cg06500161	0.0111358	21	43656587	38812981	38801671	19	TRANS
2982-82	LGALS4	SomaScan	KORA	cg07982740	0.00218902	20	44410114	38812981	38801671	19	TRANS
2982-82	LGALS4	SomaScan	KORA	cg20651995	-0.000138234	2	69525471	38812981	38801671	19	TRANS
2982-82	LGALS4	SomaScan	KORA	cg07121078	-0.00124222	18	21242319	38812981	38801671	19	TRANS
2982-82	LGALS4	SomaScan	KORA	cg00695799	-0.0330252	6	149803087	38812981	38801671	19	TRANS
2982-82	LGALS4	SomaScan	KORA	cg21736476	-0.00124467	11	56614928	38812981	38801671	19	TRANS
3029-52	CD209	SomaScan	KORA	cg18340446	-0.00246162	3	53916291	7747564	7739993	19	TRANS
3029-52	CD209	SomaScan	KORA	cg12266551	0.00534405	19	45394624	7747564	7739993	19	TRANS
3029-52	CD209	SomaScan	KORA	cg08189615	0.00504246	2	219157119	7747564	7739993	19	TRANS
3029-52	CD209	SomaScan	KORA	cg13927782	0.00340526	19	18061155	7747564	7739993	19	TRANS
3029-52	CD209	SomaScan	KORA	cg05652090	0.000697064	12	118293169	7747564	7739993	19	TRANS
3029-52	CD209	SomaScan	KORA	cg11666924	6.28855e-05	1	109289079	7747564	7739993	19	TRANS
3029-52	CD209	SomaScan	KORA	cg13868347	-0.00484571	6	17281498	7747564	7739993	19	TRANS
3029-52	CD209	SomaScan	KORA	cg12143168	0.00191581	8	144099627	7747564	7739993	19	TRANS
3029-52	CD209	SomaScan	KORA	cg18417954	-0.0029466	19	55672513	7747564	7739993	19	TRANS
3029-52	CD209	SomaScan	KORA	cg03991297	0.00217605	16	30429837	7747564	7739993	19	TRANS
3029-52	CD209	SomaScan	KORA	cg21535980	0.00364429	17	1083183	7747564	7739993	19	TRANS
3029-52	CD209	SomaScan	KORA	cg14285533	-0.00135682	7	63386328	7747564	7739993	19	TRANS
3029-52	CD209	SomaScan	KORA	cg27617775	0.00476216	11	1989850	7747564	7739993	19	TRANS
3029-52	CD209	SomaScan	KORA	cg07464977	-0.00505813	5	2097136	7747564	7739993	19	TRANS
3029-52	CD209	SomaScan	KORA	cg13875536	-0.0178928	9	135464814	7747564	7739993	19	TRANS
3029-52	CD209	SomaScan	KORA	cg20952452	0.000676894	5	176764419	7747564	7739993	19	TRANS
3029-52	CD209	SomaScan	KORA	cg15148028	0.00223643	1	245755268	7747564	7739993	19	TRANS
3029-52	CD209	SomaScan	KORA	cg00021945	0.00800789	19	52430920	7747564	7739993	19	TRANS
3029-52	CD209	SomaScan	KORA	cg16269733	0.000329777	1	156616804	7747564	7739993	19	TRANS
3029-52	CD209	SomaScan	KORA	cg07493858	0.00394422	4	183061830	7747564	7739993	19	TRANS
3029-52	CD209	SomaScan	KORA	cg03476525	-0.00868539	17	80005586	7747564	7739993	19	TRANS
3029-52	CD209	SomaScan	KORA	cg02674662	0.000179689	11	62599661	7747564	7739993	19	TRANS
3029-52	CD209	SomaScan	KORA	cg17283383	-0.00569777	12	94853645	7747564	7739993	19	TRANS
3029-52	CD209	SomaScan	KORA	cg20703671	0.000807367	17	1396001	7747564	7739993	19	TRANS
3029-52	CD209	SomaScan	KORA	cg07570573	-0.0189793	10	118925349	7747564	7739993	19	TRANS
3029-52	CD209	SomaScan	KORA	cg09745638	0.0283283	6	162294525	7747564	7739993	19	TRANS
3029-52	CD209	SomaScan	KORA	cg22306928	-0.00290046	2	219866424	7747564	7739993	19	TRANS
3029-52	CD209	SomaScan	KORA	cg12880095	-0.00309133	17	629613	7747564	7739993	19	TRANS
3029-52	CD209	SomaScan	KORA	cg24940370	-0.00214991	5	1835328	7747564	7739993	19	TRANS
3029-52	CD209	SomaScan	KORA	cg21205855	0.000898021	8	61563866	7747564	7739993	19	TRANS
3029-52	CD209	SomaScan	KORA	cg20369775	-0.00825139	13	45010051	7747564	7739993	19	TRANS
3029-52	CD209	SomaScan	KORA	cg03608342	-0.00141696	7	29724677	7747564	7739993	19	TRANS
3029-52	CD209	SomaScan	KORA	cg02638348	0.01179	10	134692167	7747564	7739993	19	TRANS
3029-52	CD209	SomaScan	KORA	cg26629969	0.0109824	19	51069496	7747564	7739993	19	TRANS
3029-52	CD209	SomaScan	KORA	cg20518446	0.0200205	11	62315034	7747564	7739993	19	TRANS
3029-52	CD209	SomaScan	KORA	cg20648501	-6.24578e-05	8	61626832	7747564	7739993	19	TRANS
3029-52	CD209	SomaScan	KORA	cg13207326	-0.0082115	4	4860190	7747564	7739993	19	TRANS
3029-52	CD209	SomaScan	KORA	cg20116670	0.00186406	19	33864427	7747564	7739993	19	TRANS
3029-52	CD209	SomaScan	KORA	cg19373545	0.00346663	1	36771793	7747564	7739993	19	TRANS
3029-52	CD209	SomaScan	KORA	cg11794625	0.00772755	2	223521104	7747564	7739993	19	TRANS
3029-52	CD209	SomaScan	KORA	cg26929272	0.0100881	10	88295210	7747564	7739993	19	TRANS
3029-52	CD209	SomaScan	KORA	cg23144445	0.00976838	8	57471162	7747564	7739993	19	TRANS
3029-52	CD209	SomaScan	KORA	cg19731612	0.0125852	5	176559334	7747564	7739993	19	TRANS
3029-52	CD209	SomaScan	KORA	cg11330469	0.00352146	11	60501024	7747564	7739993	19	TRANS
3029-52	CD209	SomaScan	KORA	cg13682044	0.0126984	17	41623249	7747564	7739993	19	TRANS
3029-52	CD209	SomaScan	KORA	cg05083393	-0.0166024	21	34864141	7747564	7739993	19	TRANS
3029-52	CD209	SomaScan	KORA	cg00259966	-0.00454313	17	73873924	7747564	7739993	19	TRANS
3029-52	CD209	SomaScan	KORA	cg24083367	0.0126152	20	48428997	7747564	7739993	19	TRANS
3029-52	CD209	SomaScan	KORA	cg09625781	-0.00194054	10	45488298	7747564	7739993	19	TRANS
3029-52	CD209	SomaScan	KORA	cg14331882	0.0103317	14	73393894	7747564	7739993	19	TRANS
3029-52	CD209	SomaScan	KORA	cg18861762	0.0224336	2	242127852	7747564	7739993	19	TRANS
3029-52	CD209	SomaScan	KORA	cg17022232	0.00401678	6	32908239	7747564	7739993	19	TRANS
3029-52	CD209	SomaScan	KORA	cg00501622	0.00806349	9	139563832	7747564	7739993	19	TRANS
3029-52	CD209	SomaScan	KORA	cg19893750	-0.0153963	5	173008109	7747564	7739993	19	TRANS
3029-52	CD209	SomaScan	KORA	cg23255963	0.00515222	10	83633679	7747564	7739993	19	TRANS
3029-52	CD209	SomaScan	KORA	cg21434376	-0.000372937	4	141563054	7747564	7739993	19	TRANS
3029-52	CD209	SomaScan	KORA	cg05943860	0.00866642	16	88898862	7747564	7739993	19	TRANS
3029-52	CD209	SomaScan	KORA	cg17501210	0.0141071	6	166970252	7747564	7739993	19	TRANS
3029-52	CD209	SomaScan	KORA	cg19888684	0.0156323	7	112002922	7747564	7739993	19	TRANS
3029-52	CD209	SomaScan	KORA	cg11983576	0.0144435	15	53090807	7747564	7739993	19	TRANS
3029-52	CD209	SomaScan	KORA	cg06765514	-0.0154922	9	130689862	7747564	7739993	19	TRANS
3029-52	CD209	SomaScan	KORA	cg13775636	-0.00377108	10	711897	7747564	7739993	19	TRANS
3029-52	CD209	SomaScan	KORA	cg21126487	0.00506262	14	37117706	7747564	7739993	19	TRANS
3029-52	CD209	SomaScan	KORA	cg00953399	0.00588575	6	116867006	7747564	7739993	19	TRANS
3029-52	CD209	SomaScan	KORA	cg16850687	-0.00036513	18	3594398	7747564	7739993	19	TRANS
3029-52	CD209	SomaScan	KORA	cg26332552	-0.0178321	3	197402549	7747564	7739993	19	TRANS
3029-52	CD209	SomaScan	KORA	cg05064567	-0.00160688	17	78870138	7747564	7739993	19	TRANS
3029-52	CD209	SomaScan	KORA	cg23041295	-0.00316797	5	15502456	7747564	7739993	19	TRANS
3029-52	CD209	SomaScan	KORA	cg10683435	-0.00250295	6	31600931	7747564	7739993	19	TRANS
3029-52	CD209	SomaScan	KORA	cg11411838	-0.01739	5	173631551	7747564	7739993	19	TRANS
3029-52	CD209	SomaScan	KORA	cg09515665	0.00326488	10	131686574	7747564	7739993	19	TRANS
3029-52	CD209	SomaScan	KORA	cg23159165	0.0125967	11	107567020	7747564	7739993	19	TRANS
3029-52	CD209	SomaScan	KORA	cg16286055	0.0011084	7	28216851	7747564	7739993	19	TRANS
3029-52	CD209	SomaScan	KORA	cg01601712	-0.00467668	7	150018095	7747564	7739993	19	TRANS
3029-52	CD209	SomaScan	KORA	cg10725912	-0.00331578	15	34127219	7747564	7739993	19	TRANS
3029-52	CD209	SomaScan	KORA	cg12224394	-0.0018271	2	219134788	7747564	7739993	19	TRANS
3029-52	CD209	SomaScan	KORA	cg07678010	-0.0203113	12	100582528	7747564	7739993	19	TRANS
3029-52	CD209	SomaScan	KORA	cg26934683	-0.00127734	1	204658803	7747564	7739993	19	TRANS
3029-52	CD209	SomaScan	KORA	cg22736956	0.00656116	11	64893575	7747564	7739993	19	TRANS
3029-52	CD209	SomaScan	KORA	cg20228731	0.00369284	7	130646051	7747564	7739993	19	TRANS
3029-52	CD209	SomaScan	KORA	cg19638749	0.0175368	2	70312615	7747564	7739993	19	TRANS
3029-52	CD209	SomaScan	KORA	cg01957088	-0.00217477	8	122651486	7747564	7739993	19	TRANS
3029-52	CD209	SomaScan	KORA	cg02531548	0.0125172	2	8234915	7747564	7739993	19	TRANS
3029-52	CD209	SomaScan	KORA	cg02194789	0.0109292	21	38074478	7747564	7739993	19	TRANS
3029-52	CD209	SomaScan	KORA	cg08202165	0.00661987	6	149744830	7747564	7739993	19	TRANS
3029-52	CD209	SomaScan	KORA	cg05644480	0.0271425	19	45418020	7747564	7739993	19	TRANS
3029-52	CD209	SomaScan	KORA	cg15980798	-0.00178687	3	54935724	7747564	7739993	19	TRANS
3029-52	CD209	SomaScan	KORA	cg08566437	0.00540646	5	161494500	7747564	7739993	19	TRANS
3029-52	CD209	SomaScan	KORA	cg19270409	-0.00288393	8	1430753	7747564	7739993	19	TRANS
3029-52	CD209	SomaScan	KORA	cg09106231	0.00798508	1	207455715	7747564	7739993	19	TRANS
3029-52	CD209	SomaScan	KORA	cg16860991	-0.00814788	4	40059040	7747564	7739993	19	TRANS
3029-52	CD209	SomaScan	KORA	cg27179353	0.00132133	4	156364125	7747564	7739993	19	TRANS
3029-52	CD209	SomaScan	KORA	cg01612247	0.00682052	17	40705588	7747564	7739993	19	TRANS
3029-52	CD209	SomaScan	KORA	cg26378403	0.00152963	12	30908310	7747564	7739993	19	TRANS
3029-52	CD209	SomaScan	KORA	cg14341014	-0.00660619	6	131461133	7747564	7739993	19	TRANS
3029-52	CD209	SomaScan	KORA	cg26875626	-0.00641815	4	153021529	7747564	7739993	19	TRANS
3029-52	CD209	SomaScan	KORA	cg03011500	0.00227974	1	151484243	7747564	7739993	19	TRANS
3029-52	CD209	SomaScan	KORA	cg12921411	0.0245772	5	150004918	7747564	7739993	19	TRANS
3029-52	CD209	SomaScan	KORA	cg24126844	0.000676885	8	97176661	7747564	7739993	19	TRANS
3029-52	CD209	SomaScan	KORA	cg07184142	-0.0103951	7	157573039	7747564	7739993	19	TRANS
3029-52	CD209	SomaScan	KORA	cg08076102	-0.0099006	22	24125924	7747564	7739993	19	TRANS
3029-52	CD209	SomaScan	KORA	cg09649495	-0.00343557	20	37075494	7747564	7739993	19	TRANS
3029-52	CD209	SomaScan	KORA	cg05075545	0.00199581	19	4183450	7747564	7739993	19	CIS
3029-52	CD209	SomaScan	KORA	cg21592463	-0.00184964	5	85756447	7747564	7739993	19	TRANS
3029-52	CD209	SomaScan	KORA	cg11095839	0.0115435	3	170924582	7747564	7739993	19	TRANS
3029-52	CD209	SomaScan	KORA	cg04369957	-0.00531045	11	8754756	7747564	7739993	19	TRANS
3029-52	CD209	SomaScan	KORA	cg03014934	0.00320829	13	36050901	7747564	7739993	19	TRANS
3029-52	CD209	SomaScan	KORA	cg18709904	-0.00706462	14	50474530	7747564	7739993	19	TRANS
3029-52	CD209	SomaScan	KORA	cg09527769	-0.00283066	4	190582456	7747564	7739993	19	TRANS
3029-52	CD209	SomaScan	KORA	cg08863693	-0.0263969	5	180683496	7747564	7739993	19	TRANS
3029-52	CD209	SomaScan	KORA	cg26655772	-0.0161171	2	161440948	7747564	7739993	19	TRANS
3029-52	CD209	SomaScan	KORA	cg04487479	0.00787598	6	70993328	7747564	7739993	19	TRANS
3029-52	CD209	SomaScan	KORA	cg00652772	0.0244771	2	102867420	7747564	7739993	19	TRANS
3029-52	CD209	SomaScan	KORA	cg02471512	-0.000555486	16	21964152	7747564	7739993	19	TRANS
3029-52	CD209	SomaScan	KORA	cg04486648	-0.00271926	1	63190136	7747564	7739993	19	TRANS
3029-52	CD209	SomaScan	KORA	cg17351862	0.0162594	17	1172501	7747564	7739993	19	TRANS
3029-52	CD209	SomaScan	KORA	cg05365320	0.00653869	1	200971339	7747564	7739993	19	TRANS
3029-52	CD209	SomaScan	KORA	cg09198031	0.00303182	7	803939	7747564	7739993	19	TRANS
3029-52	CD209	SomaScan	KORA	cg11097902	-0.0515116	11	78820712	7747564	7739993	19	TRANS
3029-52	CD209	SomaScan	KORA	cg27550721	-0.00635068	15	79381747	7747564	7739993	19	TRANS
3029-52	CD209	SomaScan	KORA	cg13807578	-0.0145439	13	30051139	7747564	7739993	19	TRANS
3029-52	CD209	SomaScan	KORA	cg17662083	0.017865	19	36004632	7747564	7739993	19	TRANS
3029-52	CD209	SomaScan	KORA	cg08219219	0.0058223	19	15337971	7747564	7739993	19	CIS
3029-52	CD209	SomaScan	KORA	cg14476101	0.0393648	1	120255992	7747564	7739993	19	TRANS
3029-52	CD209	SomaScan	KORA	cg15325961	0.00408265	8	49183143	7747564	7739993	19	TRANS
3029-52	CD209	SomaScan	KORA	cg10776533	0.0044947	3	184037459	7747564	7739993	19	TRANS
3029-52	CD209	SomaScan	KORA	cg20776947	0.0093813	12	133197827	7747564	7739993	19	TRANS
3029-52	CD209	SomaScan	KORA	cg16736630	-0.00365866	1	779995	7747564	7739993	19	TRANS
3029-52	CD209	SomaScan	KORA	cg21126707	0.00757009	12	81111012	7747564	7739993	19	TRANS
3029-52	CD209	SomaScan	KORA	cg05249479	0.00322756	14	100542584	7747564	7739993	19	TRANS
3029-52	CD209	SomaScan	KORA	cg19958024	0.00929365	6	31766138	7747564	7739993	19	TRANS
3029-52	CD209	SomaScan	KORA	cg04194066	-0.0427501	10	45567160	7747564	7739993	19	TRANS
3029-52	CD209	SomaScan	KORA	cg00555393	-0.00401894	10	15077929	7747564	7739993	19	TRANS
3029-52	CD209	SomaScan	KORA	cg18257996	0.00141535	4	124571385	7747564	7739993	19	TRANS
3029-52	CD209	SomaScan	KORA	cg11674355	-0.00627762	2	65610261	7747564	7739993	19	TRANS
3029-52	CD209	SomaScan	KORA	cg17720157	0.000547961	5	180237311	7747564	7739993	19	TRANS
3029-52	CD209	SomaScan	KORA	cg05001344	0.0263764	16	89179742	7747564	7739993	19	TRANS
3029-52	CD209	SomaScan	KORA	cg00861380	-0.000675784	12	8661336	7747564	7739993	19	TRANS
3029-52	CD209	SomaScan	KORA	cg15190383	-0.0126076	19	18888799	7747564	7739993	19	TRANS
3029-52	CD209	SomaScan	KORA	cg11770664	0.0257604	10	45470023	7747564	7739993	19	TRANS
3029-52	CD209	SomaScan	KORA	cg15072735	0.0239305	9	72375102	7747564	7739993	19	TRANS
3029-52	CD209	SomaScan	KORA	cg22445992	0.0121758	1	53926724	7747564	7739993	19	TRANS
3029-52	CD209	SomaScan	KORA	cg00248638	0.00318059	11	14521711	7747564	7739993	19	TRANS
3029-52	CD209	SomaScan	KORA	cg06382526	0.00426154	12	114918300	7747564	7739993	19	TRANS
3029-52	CD209	SomaScan	KORA	cg27110206	0.00117848	12	54750276	7747564	7739993	19	TRANS
3029-52	CD209	SomaScan	KORA	cg22953960	0.00195017	10	22766081	7747564	7739993	19	TRANS
3029-52	CD209	SomaScan	KORA	cg04349311	0.00848545	1	52521202	7747564	7739993	19	TRANS
3029-52	CD209	SomaScan	KORA	cg12236761	-0.00236657	11	130013428	7747564	7739993	19	TRANS
3029-52	CD209	SomaScan	KORA	cg09459714	0.00562952	15	27778361	7747564	7739993	19	TRANS
3029-52	CD209	SomaScan	KORA	cg14571682	-0.00471202	2	184050946	7747564	7739993	19	TRANS
3029-52	CD209	SomaScan	KORA	cg18671037	-0.00468053	14	90984545	7747564	7739993	19	TRANS
3029-52	CD209	SomaScan	KORA	cg09930496	0.00555639	10	71812956	7747564	7739993	19	TRANS
3029-52	CD209	SomaScan	KORA	cg17960426	0.0147252	8	142067321	7747564	7739993	19	TRANS
3029-52	CD209	SomaScan	KORA	cg21700831	-0.00600381	15	34415586	7747564	7739993	19	TRANS
3029-52	CD209	SomaScan	KORA	cg21919900	0.00182806	3	16103854	7747564	7739993	19	TRANS
3029-52	CD209	SomaScan	KORA	cg18481241	-0.0212985	13	48893727	7747564	7739993	19	TRANS
3029-52	CD209	SomaScan	KORA	cg12980201	-0.000286569	11	124742958	7747564	7739993	19	TRANS
3029-52	CD209	SomaScan	KORA	cg11649221	0.0151881	13	94277811	7747564	7739993	19	TRANS
3029-52	CD209	SomaScan	KORA	cg22503047	0.0210303	6	31601411	7747564	7739993	19	TRANS
3029-52	CD209	SomaScan	KORA	cg09619347	-0.00707836	11	64107520	7747564	7739993	19	TRANS
3029-52	CD209	SomaScan	KORA	cg12532563	-0.00468159	4	83956223	7747564	7739993	19	TRANS
3029-52	CD209	SomaScan	KORA	cg12629689	-0.00421542	1	45803944	7747564	7739993	19	TRANS
3029-52	CD209	SomaScan	KORA	cg18141902	0.0100838	1	2781275	7747564	7739993	19	TRANS
3035-80	IL19	SomaScan	KORA	cg26772255	0.0012677	11	117099049	206770764	206842979	1	TRANS
3035-80	IL19	SomaScan	KORA	cg21705221	0.014309	12	45609757	206770764	206842979	1	TRANS
3035-80	IL19	SomaScan	KORA	cg23634829	0.0021977	2	1713388	206770764	206842979	1	TRANS
3035-80	IL19	SomaScan	KORA	cg10333808	5.68702e-05	12	22487459	206770764	206842979	1	TRANS
3035-80	IL19	SomaScan	KORA	cg19199142	0.000826649	21	30671683	206770764	206842979	1	TRANS
3035-80	IL19	SomaScan	KORA	cg20009641	0.0114498	11	43902290	206770764	206842979	1	TRANS
3035-80	IL19	SomaScan	KORA	cg24713122	0.00604031	11	46389164	206770764	206842979	1	TRANS
3035-80	IL19	SomaScan	KORA	cg04542325	0.0035629	14	76452293	206770764	206842979	1	TRANS
3035-80	IL19	SomaScan	KORA	cg24891660	-0.00690703	8	145003653	206770764	206842979	1	TRANS
3035-80	IL19	SomaScan	KORA	cg02762393	-0.0258069	16	75019140	206770764	206842979	1	TRANS
3035-80	IL19	SomaScan	KORA	cg19295068	0.0627827	19	48206119	206770764	206842979	1	TRANS
3035-80	IL19	SomaScan	KORA	cg07561848	0.00375117	1	150551931	206770764	206842979	1	TRANS
3035-80	IL19	SomaScan	KORA	cg06744585	0.0422359	19	13135808	206770764	206842979	1	TRANS
3035-80	IL19	SomaScan	KORA	cg19267259	0.0547793	1	6453427	206770764	206842979	1	TRANS
3035-80	IL19	SomaScan	KORA	cg18093771	0.000384434	10	1256339	206770764	206842979	1	TRANS
3035-80	IL19	SomaScan	KORA	cg15033511	0.00197128	17	54994023	206770764	206842979	1	TRANS
3035-80	IL19	SomaScan	KORA	cg08767686	0.0304638	5	51426	206770764	206842979	1	TRANS
3035-80	IL19	SomaScan	KORA	cg15668587	0.000594266	11	63581119	206770764	206842979	1	TRANS
3035-80	IL19	SomaScan	KORA	cg22682031	0.00011529	1	151585010	206770764	206842979	1	TRANS
3035-80	IL19	SomaScan	KORA	cg13924809	0.00641226	2	75147126	206770764	206842979	1	TRANS
3035-80	IL19	SomaScan	KORA	cg01077808	0.0101609	19	16607011	206770764	206842979	1	TRANS
3035-80	IL19	SomaScan	KORA	cg18217145	0.000572306	1	40254695	206770764	206842979	1	TRANS
3035-80	IL19	SomaScan	KORA	cg02715797	0.0143312	16	838696	206770764	206842979	1	TRANS
3035-80	IL19	SomaScan	KORA	cg20687940	0.0050072	11	63753228	206770764	206842979	1	TRANS
3035-80	IL19	SomaScan	KORA	cg06489965	-0.00277622	16	3062975	206770764	206842979	1	TRANS
3035-80	IL19	SomaScan	KORA	cg22505086	0.0135512	7	96639411	206770764	206842979	1	TRANS
3035-80	IL19	SomaScan	KORA	cg25741837	0.00301217	2	73452813	206770764	206842979	1	TRANS
3035-80	IL19	SomaScan	KORA	cg22499215	-0.000207213	22	19772241	206770764	206842979	1	TRANS
3035-80	IL19	SomaScan	KORA	cg09428537	0.00508063	16	90039076	206770764	206842979	1	TRANS
3035-80	IL19	SomaScan	KORA	cg10775173	-0.00686811	7	151534032	206770764	206842979	1	TRANS
3035-80	IL19	SomaScan	KORA	cg10472711	0.0185032	7	797592	206770764	206842979	1	TRANS
3035-80	IL19	SomaScan	KORA	cg18011946	-0.0155518	5	65440816	206770764	206842979	1	TRANS
3035-80	IL19	SomaScan	KORA	cg04473095	-0.0414836	10	50885235	206770764	206842979	1	TRANS
3035-80	IL19	SomaScan	KORA	cg12445115	0.00102279	6	32952759	206770764	206842979	1	TRANS
3035-80	IL19	SomaScan	KORA	cg00093971	-0.0188526	3	51907586	206770764	206842979	1	TRANS
3035-80	IL19	SomaScan	KORA	cg12054453	0.0120037	17	57915717	206770764	206842979	1	TRANS
3035-80	IL19	SomaScan	KORA	cg23471338	-0.00294292	6	775386	206770764	206842979	1	TRANS
3035-80	IL19	SomaScan	KORA	cg02069772	0.0147486	1	154929317	206770764	206842979	1	TRANS
3035-80	IL19	SomaScan	KORA	cg00325917	-0.00902942	1	169671116	206770764	206842979	1	TRANS
3035-80	IL19	SomaScan	KORA	cg06117341	-0.00585911	16	3062653	206770764	206842979	1	TRANS
3035-80	IL19	SomaScan	KORA	cg01191286	0.0016336	22	50869428	206770764	206842979	1	TRANS
3035-80	IL19	SomaScan	KORA	cg02103362	0.00479683	1	5931895	206770764	206842979	1	TRANS
3035-80	IL19	SomaScan	KORA	cg14839323	0.00221056	7	99769558	206770764	206842979	1	TRANS
3035-80	IL19	SomaScan	KORA	cg07315356	0.00617327	6	32056058	206770764	206842979	1	TRANS
3035-80	IL19	SomaScan	KORA	cg06873806	-0.0217579	8	65492792	206770764	206842979	1	TRANS
3035-80	IL19	SomaScan	KORA	cg05935075	-0.0105202	1	91587141	206770764	206842979	1	TRANS
3035-80	IL19	SomaScan	KORA	cg06023646	0.00327576	3	39093550	206770764	206842979	1	TRANS
3035-80	IL19	SomaScan	KORA	cg00505502	-0.000540579	9	133028557	206770764	206842979	1	TRANS
3035-80	IL19	SomaScan	KORA	cg14245185	-0.0096057	9	116114796	206770764	206842979	1	TRANS
3035-80	IL19	SomaScan	KORA	cg16009741	-0.000983691	10	82368341	206770764	206842979	1	TRANS
3035-80	IL19	SomaScan	KORA	cg22561384	-0.00528686	8	28932160	206770764	206842979	1	TRANS
3035-80	IL19	SomaScan	KORA	cg27567761	-0.00481121	10	64573184	206770764	206842979	1	TRANS
3035-80	IL19	SomaScan	KORA	cg24152098	0.00502464	13	113707579	206770764	206842979	1	TRANS
3035-80	IL19	SomaScan	KORA	cg23883989	0.00561079	14	105886026	206770764	206842979	1	TRANS
3035-80	IL19	SomaScan	KORA	cg13226172	-0.00121141	9	34589381	206770764	206842979	1	TRANS
3035-80	IL19	SomaScan	KORA	cg19689679	-0.031133	7	157394970	206770764	206842979	1	TRANS
3035-80	IL19	SomaScan	KORA	cg19694200	-0.0125031	20	55204351	206770764	206842979	1	TRANS
3035-80	IL19	SomaScan	KORA	cg20818778	-0.0136175	1	235814145	206770764	206842979	1	TRANS
3035-80	IL19	SomaScan	KORA	cg09532575	-0.00210805	6	119224709	206770764	206842979	1	TRANS
3035-80	IL19	SomaScan	KORA	cg25500028	-0.00108238	3	187336889	206770764	206842979	1	TRANS
3035-80	IL19	SomaScan	KORA	cg26213873	-0.00391311	1	112939056	206770764	206842979	1	TRANS
3035-80	IL19	SomaScan	KORA	cg04199473	0.0114958	14	31464361	206770764	206842979	1	TRANS
3035-80	IL19	SomaScan	KORA	cg11054192	-0.01167	12	130892525	206770764	206842979	1	TRANS
3035-80	IL19	SomaScan	KORA	cg14726821	0.0469554	11	126263452	206770764	206842979	1	TRANS
3035-80	IL19	SomaScan	KORA	cg14059665	0.00214273	17	78892885	206770764	206842979	1	TRANS
3035-80	IL19	SomaScan	KORA	cg09178025	-0.000573148	11	62694932	206770764	206842979	1	TRANS
3035-80	IL19	SomaScan	KORA	cg07190917	-0.00539381	16	31045100	206770764	206842979	1	TRANS
3035-80	IL19	SomaScan	KORA	cg15450224	0.00541795	4	166533691	206770764	206842979	1	TRANS
3035-80	IL19	SomaScan	KORA	cg17715419	0.0043935	6	80023191	206770764	206842979	1	TRANS
3035-80	IL19	SomaScan	KORA	cg17010100	-0.00577856	5	59188112	206770764	206842979	1	TRANS
3035-80	IL19	SomaScan	KORA	cg12374353	-0.0170695	3	154750428	206770764	206842979	1	TRANS
3035-80	IL19	SomaScan	KORA	cg15108699	0.000149442	20	62509164	206770764	206842979	1	TRANS
3035-80	IL19	SomaScan	KORA	cg00818822	0.000696694	19	6002752	206770764	206842979	1	TRANS
3035-80	IL19	SomaScan	KORA	cg23955860	-0.00681278	1	29676467	206770764	206842979	1	TRANS
3035-80	IL19	SomaScan	KORA	cg09002919	-0.00875269	12	50339186	206770764	206842979	1	TRANS
3035-80	IL19	SomaScan	KORA	cg07546943	-0.00548557	2	236523362	206770764	206842979	1	TRANS
3035-80	IL19	SomaScan	KORA	cg04914357	0.00145606	11	94474755	206770764	206842979	1	TRANS
3035-80	IL19	SomaScan	KORA	cg09349128	0.0019294	22	50327986	206770764	206842979	1	TRANS
3035-80	IL19	SomaScan	KORA	cg25485435	0.013937	2	238767502	206770764	206842979	1	TRANS
3035-80	IL19	SomaScan	KORA	cg21001487	-0.00374571	8	53853112	206770764	206842979	1	TRANS
3035-80	IL19	SomaScan	KORA	cg12636499	-0.00284449	10	105408599	206770764	206842979	1	TRANS
3038-9	CXCL11	SomaScan	KORA	cg08724866	0.0217713	12	56321427	76041415	76033682	4	TRANS
3038-9	CXCL11	SomaScan	KORA	cg01507044	0.0298669	13	23949294	76041415	76033682	4	TRANS
3038-9	CXCL11	SomaScan	KORA	cg01681367	-0.00930456	16	29676071	76041415	76033682	4	TRANS
3038-9	CXCL11	SomaScan	KORA	cg25170591	-0.00293343	10	103881062	76041415	76033682	4	TRANS
3038-9	CXCL11	SomaScan	KORA	cg25075644	0.00785182	18	56338565	76041415	76033682	4	TRANS
3038-9	CXCL11	SomaScan	KORA	cg01922433	0.00185573	1	150529761	76041415	76033682	4	TRANS
3038-9	CXCL11	SomaScan	KORA	cg17271338	0.0213065	4	187112041	76041415	76033682	4	TRANS
3038-9	CXCL11	SomaScan	KORA	cg25742246	0.0104185	1	214153460	76041415	76033682	4	TRANS
3038-9	CXCL11	SomaScan	KORA	cg16453901	-0.0048965	6	170730693	76041415	76033682	4	TRANS
3038-9	CXCL11	SomaScan	KORA	cg26767085	-0.0123979	19	7977494	76041415	76033682	4	TRANS
3038-9	CXCL11	SomaScan	KORA	cg20519121	0.0084149	2	133014640	76041415	76033682	4	TRANS
3038-9	CXCL11	SomaScan	KORA	cg00849990	-0.000523943	8	86090773	76041415	76033682	4	TRANS
3038-9	CXCL11	SomaScan	KORA	cg27249178	0.0102682	3	138067404	76041415	76033682	4	TRANS
3038-9	CXCL11	SomaScan	KORA	cg07519515	0.01754	16	2040415	76041415	76033682	4	TRANS
3038-9	CXCL11	SomaScan	KORA	cg23038277	0.00115639	1	226833134	76041415	76033682	4	TRANS
3038-9	CXCL11	SomaScan	KORA	cg06858150	-0.0074373	19	7977647	76041415	76033682	4	TRANS
3038-9	CXCL11	SomaScan	KORA	cg19162300	-0.00342407	6	33860869	76041415	76033682	4	TRANS
3038-9	CXCL11	SomaScan	KORA	cg14304690	0.00799326	12	56321600	76041415	76033682	4	TRANS
3038-9	CXCL11	SomaScan	KORA	cg26317405	0.00766617	11	67188521	76041415	76033682	4	TRANS
3038-9	CXCL11	SomaScan	KORA	cg07839457	-0.101084	16	57023022	76041415	76033682	4	TRANS
3038-9	CXCL11	SomaScan	KORA	cg12639429	0.0101393	18	21572622	76041415	76033682	4	TRANS
3038-9	CXCL11	SomaScan	KORA	cg24856658	-0.00845127	5	78533917	76041415	76033682	4	TRANS
3038-9	CXCL11	SomaScan	KORA	cg00246301	0.0105069	2	101086963	76041415	76033682	4	TRANS
3038-9	CXCL11	SomaScan	KORA	cg16336494	-0.011394	6	151188259	76041415	76033682	4	TRANS
3038-9	CXCL11	SomaScan	KORA	cg03256729	-0.00475738	1	112125952	76041415	76033682	4	TRANS
3038-9	CXCL11	SomaScan	KORA	cg26612727	0.00319554	17	38024636	76041415	76033682	4	TRANS
3038-9	CXCL11	SomaScan	KORA	cg25008524	-0.00446729	6	168443212	76041415	76033682	4	TRANS
3038-9	CXCL11	SomaScan	KORA	cg25487430	0.0103841	11	78380818	76041415	76033682	4	TRANS
3038-9	CXCL11	SomaScan	KORA	cg10726816	-0.00158273	6	27635802	76041415	76033682	4	TRANS
3038-9	CXCL11	SomaScan	KORA	cg27298085	0.0254308	17	67410700	76041415	76033682	4	TRANS
3038-9	CXCL11	SomaScan	KORA	cg24908097	-0.00822684	6	116744279	76041415	76033682	4	TRANS
3038-9	CXCL11	SomaScan	KORA	cg27336379	0.0010917	1	76078230	76041415	76033682	4	TRANS
3038-9	CXCL11	SomaScan	KORA	cg14750757	0.00318097	3	127506604	76041415	76033682	4	TRANS
3038-9	CXCL11	SomaScan	KORA	cg06668527	-0.00697096	8	126444439	76041415	76033682	4	TRANS
3038-9	CXCL11	SomaScan	KORA	cg09410234	0.0327588	1	111217715	76041415	76033682	4	TRANS
3038-9	CXCL11	SomaScan	KORA	cg25843003	-0.0210932	6	31431312	76041415	76033682	4	TRANS
3038-9	CXCL11	SomaScan	KORA	cg00589305	-0.0047929	11	19367621	76041415	76033682	4	TRANS
3038-9	CXCL11	SomaScan	KORA	cg25198113	0.00489337	1	5743886	76041415	76033682	4	TRANS
3038-9	CXCL11	SomaScan	KORA	cg09386050	0.00347513	7	809078	76041415	76033682	4	TRANS
3038-9	CXCL11	SomaScan	KORA	cg16411857	-0.0109267	16	57023191	76041415	76033682	4	TRANS
3038-9	CXCL11	SomaScan	KORA	cg13049247	-0.0171075	2	1204879	76041415	76033682	4	TRANS
3038-9	CXCL11	SomaScan	KORA	cg20069939	-0.0102416	12	124512038	76041415	76033682	4	TRANS
3038-9	CXCL11	SomaScan	KORA	cg07081739	0.00830393	6	27214794	76041415	76033682	4	TRANS
3038-9	CXCL11	SomaScan	KORA	cg11606575	0.0059191	11	45306397	76041415	76033682	4	TRANS
3038-9	CXCL11	SomaScan	KORA	cg18132851	-0.00178098	6	152085641	76041415	76033682	4	TRANS
3038-9	CXCL11	SomaScan	KORA	cg22572476	0.00128138	6	28601324	76041415	76033682	4	TRANS
3038-9	CXCL11	SomaScan	KORA	cg11888571	0.0157764	10	102027403	76041415	76033682	4	TRANS
3038-9	CXCL11	SomaScan	KORA	cg12609063	0.0015258	1	116549227	76041415	76033682	4	TRANS
3038-9	CXCL11	SomaScan	KORA	cg19311244	0.00217159	4	77341912	76041415	76033682	4	CIS
3038-9	CXCL11	SomaScan	KORA	cg24165667	0.0232786	5	71616247	76041415	76033682	4	TRANS
3038-9	CXCL11	SomaScan	KORA	cg10061342	-0.00360682	1	184357556	76041415	76033682	4	TRANS
3041-55	MRC2	SomaScan	KORA	cg23189692	0.00688685	3	184050393	62627670	62693597	17	TRANS
3041-55	MRC2	SomaScan	KORA	cg15699874	0.00229456	11	126152981	62627670	62693597	17	TRANS
3041-55	MRC2	SomaScan	KORA	cg17593625	0.0187385	7	752800	62627670	62693597	17	TRANS
3041-55	MRC2	SomaScan	KORA	cg01150799	-0.0140919	4	108955838	62627670	62693597	17	TRANS
3041-55	MRC2	SomaScan	KORA	cg25939371	0.00273629	15	72598286	62627670	62693597	17	TRANS
3041-55	MRC2	SomaScan	KORA	cg09662754	-0.00631654	1	24645805	62627670	62693597	17	TRANS
3041-55	MRC2	SomaScan	KORA	cg01965673	-0.01044	3	126700750	62627670	62693597	17	TRANS
3041-55	MRC2	SomaScan	KORA	cg12992827	0.00527751	3	101901234	62627670	62693597	17	TRANS
3041-55	MRC2	SomaScan	KORA	cg09750400	0.00899546	16	30110280	62627670	62693597	17	TRANS
3041-55	MRC2	SomaScan	KORA	cg01311537	0.0101247	10	50386709	62627670	62693597	17	TRANS
3041-55	MRC2	SomaScan	KORA	cg26450228	0.00604044	17	64575581	62627670	62693597	17	CIS
3041-55	MRC2	SomaScan	KORA	cg01176329	0.0113844	6	29592381	62627670	62693597	17	TRANS
3041-55	MRC2	SomaScan	KORA	cg10636246	0.00862945	1	159046973	62627670	62693597	17	TRANS
3041-55	MRC2	SomaScan	KORA	cg17130457	0.00540535	12	76414729	62627670	62693597	17	TRANS
3041-55	MRC2	SomaScan	KORA	cg27407935	0.00286866	17	17723235	62627670	62693597	17	TRANS
3041-55	MRC2	SomaScan	KORA	cg03268697	0.00312439	17	75160330	62627670	62693597	17	TRANS
3041-55	MRC2	SomaScan	KORA	cg23344523	0.0210334	6	160380572	62627670	62693597	17	TRANS
3044-3	CCL18	SomaScan	KORA	cg15014975	0.0187779	1	25257547	36064272	36072388	17	TRANS
3044-3	CCL18	SomaScan	KORA	cg22711274	0.0292387	10	70091418	36064272	36072388	17	TRANS
3044-3	CCL18	SomaScan	KORA	cg16853034	0.0202794	19	7746413	36064272	36072388	17	TRANS
3044-3	CCL18	SomaScan	KORA	cg07806886	0.00176749	3	120626899	36064272	36072388	17	TRANS
3044-3	CCL18	SomaScan	KORA	cg21836275	0.00233173	12	104235298	36064272	36072388	17	TRANS
3044-3	CCL18	SomaScan	KORA	cg26275825	-0.00262449	10	135008417	36064272	36072388	17	TRANS
3044-3	CCL18	SomaScan	KORA	cg10880755	-0.0037278	5	43192240	36064272	36072388	17	TRANS
3044-3	CCL18	SomaScan	KORA	cg05991454	0.0273857	4	147558435	36064272	36072388	17	TRANS
3044-3	CCL18	SomaScan	KORA	cg08540945	0.00188082	7	152591698	36064272	36072388	17	TRANS
3044-3	CCL18	SomaScan	KORA	cg03582047	0.0138049	17	9729235	36064272	36072388	17	TRANS
3044-3	CCL18	SomaScan	KORA	cg15816271	-0.00736953	5	41968459	36064272	36072388	17	TRANS
3044-3	CCL18	SomaScan	KORA	cg12678451	0.0159342	3	38388172	36064272	36072388	17	TRANS
3044-3	CCL18	SomaScan	KORA	cg04875128	0.00502478	15	31775895	36064272	36072388	17	TRANS
3044-3	CCL18	SomaScan	KORA	cg24701867	-0.0103156	1	1189640	36064272	36072388	17	TRANS
3044-3	CCL18	SomaScan	KORA	cg01547142	-0.00491018	22	35820222	36064272	36072388	17	TRANS
3044-3	CCL18	SomaScan	KORA	cg05347965	0.0172305	17	55663256	36064272	36072388	17	TRANS
3044-3	CCL18	SomaScan	KORA	cg01915283	-0.0115842	22	39711362	36064272	36072388	17	TRANS
3044-3	CCL18	SomaScan	KORA	cg13473356	0.00287714	3	179754613	36064272	36072388	17	TRANS
3044-3	CCL18	SomaScan	KORA	cg22792367	-0.00292106	5	96267912	36064272	36072388	17	TRANS
3044-3	CCL18	SomaScan	KORA	cg05946694	0.0048498	6	35732268	36064272	36072388	17	TRANS
3044-3	CCL18	SomaScan	KORA	cg25678491	-3.33127e-05	13	101327172	36064272	36072388	17	TRANS
3044-3	CCL18	SomaScan	KORA	cg06530960	-0.0044594	19	49140787	36064272	36072388	17	TRANS
3044-3	CCL18	SomaScan	KORA	cg16867657	0.0155462	6	11044877	36064272	36072388	17	TRANS
3044-3	CCL18	SomaScan	KORA	cg13647155	0.00944609	5	176046497	36064272	36072388	17	TRANS
3044-3	CCL18	SomaScan	KORA	cg22454769	0.0115813	2	106015767	36064272	36072388	17	TRANS
3044-3	CCL18	SomaScan	KORA	cg07839457	-0.0228433	16	57023022	36064272	36072388	17	TRANS
3044-3	CCL18	SomaScan	KORA	cg03882929	0.0158019	1	42800280	36064272	36072388	17	TRANS
3044-3	CCL18	SomaScan	KORA	cg07346171	-0.00312097	1	29281659	36064272	36072388	17	TRANS
3044-3	CCL18	SomaScan	KORA	cg00054706	0.00190406	2	68289972	36064272	36072388	17	TRANS
3044-3	CCL18	SomaScan	KORA	cg14240646	-0.00676626	10	27532245	36064272	36072388	17	TRANS
3044-3	CCL18	SomaScan	KORA	cg05110389	-0.0306177	15	92005188	36064272	36072388	17	TRANS
3044-3	CCL18	SomaScan	KORA	cg07735571	0.00427096	22	39796170	36064272	36072388	17	TRANS
3044-3	CCL18	SomaScan	KORA	cg07625840	0.00649986	4	119274341	36064272	36072388	17	TRANS
3044-3	CCL18	SomaScan	KORA	cg12127991	-0.00991411	1	228870637	36064272	36072388	17	TRANS
3044-3	CCL18	SomaScan	KORA	cg26119367	0.00709249	2	17699620	36064272	36072388	17	TRANS
3044-3	CCL18	SomaScan	KORA	cg20805835	-0.00992482	1	248005719	36064272	36072388	17	TRANS
3044-3	CCL18	SomaScan	KORA	cg26069615	-0.000642163	12	46637975	36064272	36072388	17	TRANS
3044-3	CCL18	SomaScan	KORA	cg13910291	-0.0041341	17	55927852	36064272	36072388	17	TRANS
3044-3	CCL18	SomaScan	KORA	cg01019028	0.00175727	6	132722810	36064272	36072388	17	TRANS
3044-3	CCL18	SomaScan	KORA	cg10828900	0.00747354	5	38462005	36064272	36072388	17	TRANS
3044-3	CCL18	SomaScan	KORA	cg21232015	0.00331996	12	133424221	36064272	36072388	17	TRANS
3044-3	CCL18	SomaScan	KORA	cg03301331	0.00173847	1	229406681	36064272	36072388	17	TRANS
3044-3	CCL18	SomaScan	KORA	cg26126740	0.0222511	20	42574332	36064272	36072388	17	TRANS
3044-3	CCL18	SomaScan	KORA	cg18149207	0.0156712	1	151805634	36064272	36072388	17	TRANS
3044-3	CCL18	SomaScan	KORA	cg16788137	-0.0130329	7	8008242	36064272	36072388	17	TRANS
3044-3	CCL18	SomaScan	KORA	cg04768002	0.00427596	7	97937117	36064272	36072388	17	TRANS
3044-3	CCL18	SomaScan	KORA	cg24085426	-0.02005	12	47583278	36064272	36072388	17	TRANS
3044-3	CCL18	SomaScan	KORA	cg05042728	-0.00200773	10	43187184	36064272	36072388	17	TRANS
3044-3	CCL18	SomaScan	KORA	cg08322234	0.00173948	17	55663284	36064272	36072388	17	TRANS
3044-3	CCL18	SomaScan	KORA	cg04023434	-0.0118079	1	183778265	36064272	36072388	17	TRANS
3044-3	CCL18	SomaScan	KORA	cg12024906	0.0045974	19	37825679	36064272	36072388	17	TRANS
3044-3	CCL18	SomaScan	KORA	cg01960979	-0.00630598	16	1611342	36064272	36072388	17	TRANS
3044-3	CCL18	SomaScan	KORA	cg15551881	0.00839613	9	123688715	36064272	36072388	17	TRANS
3044-3	CCL18	SomaScan	KORA	cg04714939	0.00366569	10	80917620	36064272	36072388	17	TRANS
3044-3	CCL18	SomaScan	KORA	cg13348458	0.00693384	6	27569671	36064272	36072388	17	TRANS
3044-3	CCL18	SomaScan	KORA	cg00574958	-0.024709	11	68607622	36064272	36072388	17	TRANS
3044-3	CCL18	SomaScan	KORA	cg05774915	0.0012601	3	27755417	36064272	36072388	17	TRANS
3044-3	CCL18	SomaScan	KORA	cg06268921	0.00664957	1	214158573	36064272	36072388	17	TRANS
3044-3	CCL18	SomaScan	KORA	cg03275698	0.0013745	16	3412655	36064272	36072388	17	TRANS
3044-3	CCL18	SomaScan	KORA	cg07920503	0.000341511	13	25745406	36064272	36072388	17	TRANS
3044-3	CCL18	SomaScan	KORA	cg08553913	0.00538426	17	37028977	36064272	36072388	17	CIS
3044-3	CCL18	SomaScan	KORA	cg07213616	-0.0226982	5	60725347	36064272	36072388	17	TRANS
3044-3	CCL18	SomaScan	KORA	cg26691434	-0.0117946	16	29675160	36064272	36072388	17	TRANS
3044-3	CCL18	SomaScan	KORA	cg24174665	0.0235964	8	56433664	36064272	36072388	17	TRANS
3044-3	CCL18	SomaScan	KORA	cg19909658	-0.0143591	17	38447008	36064272	36072388	17	CIS
3044-3	CCL18	SomaScan	KORA	cg12878216	-0.0144189	6	74909201	36064272	36072388	17	TRANS
3044-3	CCL18	SomaScan	KORA	cg25399998	-0.011401	5	170217126	36064272	36072388	17	TRANS
3044-3	CCL18	SomaScan	KORA	cg02452500	0.00652136	11	13161927	36064272	36072388	17	TRANS
3044-3	CCL18	SomaScan	KORA	cg08672677	-0.00463259	17	55927911	36064272	36072388	17	TRANS
3044-3	CCL18	SomaScan	KORA	cg07326267	-0.000735248	10	134456012	36064272	36072388	17	TRANS
3044-3	CCL18	SomaScan	KORA	cg02288684	0.0102678	16	893259	36064272	36072388	17	TRANS
3044-3	CCL18	SomaScan	KORA	cg19779123	0.00261612	11	57061898	36064272	36072388	17	TRANS
3044-3	CCL18	SomaScan	KORA	cg02152265	2.71354e-05	19	17324656	36064272	36072388	17	TRANS
3044-3	CCL18	SomaScan	KORA	cg26629942	-0.0200079	17	49998512	36064272	36072388	17	TRANS
3044-3	CCL18	SomaScan	KORA	cg13497017	-0.0006619	1	237214259	36064272	36072388	17	TRANS
3044-3	CCL18	SomaScan	KORA	cg05508455	0.00434047	17	67542788	36064272	36072388	17	TRANS
3044-3	CCL18	SomaScan	KORA	cg06372850	0.00442221	2	164205188	36064272	36072388	17	TRANS
3044-3	CCL18	SomaScan	KORA	cg16851423	-0.013047	2	98350669	36064272	36072388	17	TRANS
3044-3	CCL18	SomaScan	KORA	cg06064269	0.00767566	2	230136510	36064272	36072388	17	TRANS
3044-3	CCL18	SomaScan	KORA	cg07279442	-0.00105638	3	124848635	36064272	36072388	17	TRANS
3044-3	CCL18	SomaScan	KORA	cg16049600	0.00142993	5	140579298	36064272	36072388	17	TRANS
3044-3	CCL18	SomaScan	KORA	cg27243700	-9.83648e-05	17	59536636	36064272	36072388	17	TRANS
3044-3	CCL18	SomaScan	KORA	cg09823288	-0.00282156	1	239552128	36064272	36072388	17	TRANS
3044-3	CCL18	SomaScan	KORA	cg07504977	0.0160012	10	102131012	36064272	36072388	17	TRANS
3044-3	CCL18	SomaScan	KORA	cg01198655	-0.000711126	2	15403576	36064272	36072388	17	TRANS
3044-3	CCL18	SomaScan	KORA	cg21234342	-0.000434499	6	46871130	36064272	36072388	17	TRANS
3044-3	CCL18	SomaScan	KORA	cg17522241	-0.00112728	1	161355643	36064272	36072388	17	TRANS
3044-3	CCL18	SomaScan	KORA	cg11159417	-0.0029065	5	148822491	36064272	36072388	17	TRANS
3044-3	CCL18	SomaScan	KORA	cg18181703	-0.0431353	17	76354621	36064272	36072388	17	TRANS
3044-3	CCL18	SomaScan	KORA	cg24834889	0.0136351	19	37825406	36064272	36072388	17	TRANS
3044-3	CCL18	SomaScan	KORA	cg24070198	0.00688849	6	37014597	36064272	36072388	17	TRANS
3044-3	CCL18	SomaScan	KORA	cg24741609	0.0123187	1	54122060	36064272	36072388	17	TRANS
3044-3	CCL18	SomaScan	KORA	cg15188939	0.00878662	15	72809154	36064272	36072388	17	TRANS
3044-3	CCL18	SomaScan	KORA	cg11024682	0.0180212	17	17730094	36064272	36072388	17	TRANS
3044-3	CCL18	SomaScan	KORA	cg09221867	0.00805855	4	134071663	36064272	36072388	17	TRANS
3044-3	CCL18	SomaScan	KORA	cg17526483	-0.00498322	7	27281404	36064272	36072388	17	TRANS
3044-3	CCL18	SomaScan	KORA	cg04477962	-0.012111	12	51317375	36064272	36072388	17	TRANS
3044-3	CCL18	SomaScan	KORA	cg08306614	-0.00237933	7	44423096	36064272	36072388	17	TRANS
3044-3	CCL18	SomaScan	KORA	cg04332442	-0.0300649	22	46770063	36064272	36072388	17	TRANS
3044-3	CCL18	SomaScan	KORA	cg06500161	0.011031	21	43656587	36064272	36072388	17	TRANS
3044-3	CCL18	SomaScan	KORA	cg12747056	-0.00676376	9	136726575	36064272	36072388	17	TRANS
3044-3	CCL18	SomaScan	KORA	cg11770664	-0.00666114	10	45470023	36064272	36072388	17	TRANS
3044-3	CCL18	SomaScan	KORA	cg17075538	0.00284841	19	15306892	36064272	36072388	17	TRANS
3044-3	CCL18	SomaScan	KORA	cg27192248	-0.0527159	15	65285669	36064272	36072388	17	TRANS
3044-3	CCL18	SomaScan	KORA	cg23387863	-0.019352	15	77472416	36064272	36072388	17	TRANS
3044-3	CCL18	SomaScan	KORA	cg11970480	-0.0191046	6	159061319	36064272	36072388	17	TRANS
3044-3	CCL18	SomaScan	KORA	cg25594876	-0.0064275	3	127059297	36064272	36072388	17	TRANS
3044-3	CCL18	SomaScan	KORA	cg23500537	0.0110024	5	140419819	36064272	36072388	17	TRANS
3044-3	CCL18	SomaScan	KORA	cg19824783	0.0109146	22	19118762	36064272	36072388	17	TRANS
3044-3	CCL18	SomaScan	KORA	cg11875028	-0.00537964	7	42742698	36064272	36072388	17	TRANS
3044-3	CCL18	SomaScan	KORA	cg26175448	0.0161159	17	39072167	36064272	36072388	17	CIS
3044-3	CCL18	SomaScan	KORA	cg09501333	-0.00474647	1	113671664	36064272	36072388	17	TRANS
3044-3	CCL18	SomaScan	KORA	cg02068690	0.0142781	2	25600451	36064272	36072388	17	TRANS
3044-3	CCL18	SomaScan	KORA	cg05928537	0.00927378	16	84631739	36064272	36072388	17	TRANS
3044-3	CCL18	SomaScan	KORA	cg20082170	0.00240585	3	62709536	36064272	36072388	17	TRANS
3044-3	CCL18	SomaScan	KORA	cg11826999	-0.00749325	15	78895837	36064272	36072388	17	TRANS
3044-3	CCL18	SomaScan	KORA	cg02133716	-0.0192851	8	128981622	36064272	36072388	17	TRANS
3044-3	CCL18	SomaScan	KORA	cg01667892	-0.015565	5	23507656	36064272	36072388	17	TRANS
3044-3	CCL18	SomaScan	KORA	cg12609948	-0.000565598	1	7767865	36064272	36072388	17	TRANS
3046-31	RETN	SomaScan	KORA	cg21385822	-0.0011257	15	75661000	7669049	7670455	19	TRANS
3046-31	RETN	SomaScan	KORA	cg10706454	0.00113078	1	27286944	7669049	7670455	19	TRANS
3046-31	RETN	SomaScan	KORA	cg19295068	-0.0184541	19	48206119	7669049	7670455	19	TRANS
3046-31	RETN	SomaScan	KORA	cg07744435	-0.00211004	11	67768362	7669049	7670455	19	TRANS
3046-31	RETN	SomaScan	KORA	cg05431171	-0.00085036	6	35461405	7669049	7670455	19	TRANS
3046-31	RETN	SomaScan	KORA	cg13984040	-0.00123008	12	125258948	7669049	7670455	19	TRANS
3046-31	RETN	SomaScan	KORA	cg15828364	6.7943e-05	11	20626786	7669049	7670455	19	TRANS
3046-31	RETN	SomaScan	KORA	cg17901584	-0.0118503	1	55353706	7669049	7670455	19	TRANS
3046-31	RETN	SomaScan	KORA	cg18935453	-0.00821053	11	68167030	7669049	7670455	19	TRANS
3046-31	RETN	SomaScan	KORA	cg24843346	-0.000780402	8	142736091	7669049	7670455	19	TRANS
3046-31	RETN	SomaScan	KORA	cg09916783	-0.00394032	2	25391911	7669049	7670455	19	TRANS
3046-31	RETN	SomaScan	KORA	cg02346997	-0.0745392	19	7733883	7669049	7670455	19	CIS
3046-31	RETN	SomaScan	KORA	cg25406989	-0.00226212	15	48936335	7669049	7670455	19	TRANS
3046-31	RETN	SomaScan	KORA	cg07071764	-0.0139902	11	92441315	7669049	7670455	19	TRANS
3046-31	RETN	SomaScan	KORA	cg02048220	0.000642198	14	91141833	7669049	7670455	19	TRANS
3046-31	RETN	SomaScan	KORA	cg22322184	-0.0528943	19	7734203	7669049	7670455	19	CIS
3046-31	RETN	SomaScan	KORA	cg07787977	-0.036653	1	962651	7669049	7670455	19	TRANS
3046-31	RETN	SomaScan	KORA	cg05381960	-0.0169283	1	153946822	7669049	7670455	19	TRANS
3046-31	RETN	SomaScan	KORA	cg00867472	-0.0263323	1	156714808	7669049	7670455	19	TRANS
3046-31	RETN	SomaScan	KORA	cg11276500	-0.00547622	6	1909853	7669049	7670455	19	TRANS
3046-31	RETN	SomaScan	KORA	cg11835347	0.00205687	1	113248232	7669049	7670455	19	TRANS
3060-43	C9	SomaScan	KORA	cg02296583	-0.00869912	1	229478159	39424868	39284140	5	TRANS
3060-43	C9	SomaScan	KORA	cg23595222	-0.0223398	22	46449430	39424868	39284140	5	TRANS
3060-43	C9	SomaScan	KORA	cg07628841	0.00780727	2	27851430	39424868	39284140	5	TRANS
3060-43	C9	SomaScan	KORA	cg14956201	-0.00587146	5	14358153	39424868	39284140	5	TRANS
3060-43	C9	SomaScan	KORA	cg01444397	0.0367769	1	7844450	39424868	39284140	5	TRANS
3060-43	C9	SomaScan	KORA	cg17544639	-0.000621509	10	102289693	39424868	39284140	5	TRANS
3060-43	C9	SomaScan	KORA	cg16626280	-0.0384853	5	128430255	39424868	39284140	5	TRANS
3060-43	C9	SomaScan	KORA	cg19295068	-0.0195902	19	48206119	39424868	39284140	5	TRANS
3060-43	C9	SomaScan	KORA	cg17051905	-0.018881	8	1725140	39424868	39284140	5	TRANS
3060-43	C9	SomaScan	KORA	cg23092358	0.000120377	4	147443662	39424868	39284140	5	TRANS
3060-43	C9	SomaScan	KORA	cg11183036	-0.00301112	6	37070600	39424868	39284140	5	TRANS
3060-43	C9	SomaScan	KORA	cg18223453	0.00139498	17	59554746	39424868	39284140	5	TRANS
3060-43	C9	SomaScan	KORA	cg06005309	-0.013514	2	202316239	39424868	39284140	5	TRANS
3060-43	C9	SomaScan	KORA	cg04747308	0.00193186	2	118943906	39424868	39284140	5	TRANS
3060-43	C9	SomaScan	KORA	cg13612480	-0.0588712	19	1103771	39424868	39284140	5	TRANS
3060-43	C9	SomaScan	KORA	cg18068240	-0.00163045	5	142783843	39424868	39284140	5	TRANS
3060-43	C9	SomaScan	KORA	cg04341097	0.0105705	13	114871575	39424868	39284140	5	TRANS
3060-43	C9	SomaScan	KORA	cg26851608	-0.00410191	13	52378480	39424868	39284140	5	TRANS
3060-43	C9	SomaScan	KORA	cg04787024	0.0137722	2	99553442	39424868	39284140	5	TRANS
3060-43	C9	SomaScan	KORA	cg23038567	-0.00299928	19	36505654	39424868	39284140	5	TRANS
3060-43	C9	SomaScan	KORA	cg27128322	0.0151208	18	43547338	39424868	39284140	5	TRANS
3060-43	C9	SomaScan	KORA	cg22367159	-0.014193	1	947018	39424868	39284140	5	TRANS
3060-43	C9	SomaScan	KORA	cg09350798	-0.000974053	11	121322954	39424868	39284140	5	TRANS
3060-43	C9	SomaScan	KORA	cg01053766	0.00664324	5	10479730	39424868	39284140	5	TRANS
3060-43	C9	SomaScan	KORA	cg03497652	-0.0118119	16	4751569	39424868	39284140	5	TRANS
3060-43	C9	SomaScan	KORA	cg03032053	-0.00258201	7	1495311	39424868	39284140	5	TRANS
3060-43	C9	SomaScan	KORA	cg25220063	0.00453037	1	247802774	39424868	39284140	5	TRANS
3060-43	C9	SomaScan	KORA	cg05091585	-0.00469822	13	45507332	39424868	39284140	5	TRANS
3060-43	C9	SomaScan	KORA	cg05278442	0.0136023	7	92861491	39424868	39284140	5	TRANS
3060-43	C9	SomaScan	KORA	cg02077793	0.00171528	19	10983098	39424868	39284140	5	TRANS
3060-43	C9	SomaScan	KORA	cg25373579	-0.00313158	6	43752302	39424868	39284140	5	TRANS
3060-43	C9	SomaScan	KORA	cg22904406	-0.0229114	6	33288296	39424868	39284140	5	TRANS
3060-43	C9	SomaScan	KORA	cg12051819	-0.0054726	1	114717638	39424868	39284140	5	TRANS
3060-43	C9	SomaScan	KORA	cg13964781	0.00479337	19	14552350	39424868	39284140	5	TRANS
3060-43	C9	SomaScan	KORA	cg07147033	-0.0073893	1	1549615	39424868	39284140	5	TRANS
3060-43	C9	SomaScan	KORA	cg19008088	-0.0139965	10	102890038	39424868	39284140	5	TRANS
3060-43	C9	SomaScan	KORA	cg16426510	-0.0165584	11	46041219	39424868	39284140	5	TRANS
3060-43	C9	SomaScan	KORA	cg19116924	0.0180427	5	14710952	39424868	39284140	5	TRANS
3060-43	C9	SomaScan	KORA	cg11731890	-0.00963355	6	26271827	39424868	39284140	5	TRANS
3060-43	C9	SomaScan	KORA	cg27462975	0.000919892	4	24415155	39424868	39284140	5	TRANS
3060-43	C9	SomaScan	KORA	cg14437092	0.00345635	14	66970921	39424868	39284140	5	TRANS
3060-43	C9	SomaScan	KORA	cg16277214	-0.00323307	3	32434339	39424868	39284140	5	TRANS
3060-43	C9	SomaScan	KORA	cg23804261	-0.010493	10	34871720	39424868	39284140	5	TRANS
3060-43	C9	SomaScan	KORA	cg18978531	-0.01324	15	70403809	39424868	39284140	5	TRANS
3060-43	C9	SomaScan	KORA	cg18642234	-0.0163213	3	49394622	39424868	39284140	5	TRANS
3060-43	C9	SomaScan	KORA	cg19718359	-0.0076997	1	111035897	39424868	39284140	5	TRANS
3060-43	C9	SomaScan	KORA	cg26640901	-0.00370172	10	104536035	39424868	39284140	5	TRANS
3060-43	C9	SomaScan	KORA	cg19010566	0.0021534	20	23062796	39424868	39284140	5	TRANS
3060-43	C9	SomaScan	KORA	cg14521987	-0.00902927	9	129236500	39424868	39284140	5	TRANS
3060-43	C9	SomaScan	KORA	cg02736204	-0.0156861	1	38059219	39424868	39284140	5	TRANS
3060-43	C9	SomaScan	KORA	cg27469606	-0.00614551	19	1154485	39424868	39284140	5	TRANS
3060-43	C9	SomaScan	KORA	cg02930132	0.00818811	12	76742536	39424868	39284140	5	TRANS
3060-43	C9	SomaScan	KORA	cg14965639	-0.0174592	2	48795994	39424868	39284140	5	TRANS
3060-43	C9	SomaScan	KORA	cg17845732	0.0173311	19	36130321	39424868	39284140	5	TRANS
3060-43	C9	SomaScan	KORA	cg11643285	0.00491067	3	16411667	39424868	39284140	5	TRANS
3060-43	C9	SomaScan	KORA	cg22002629	-0.000816641	4	26361410	39424868	39284140	5	TRANS
3060-43	C9	SomaScan	KORA	cg14592260	0.00779688	11	108798655	39424868	39284140	5	TRANS
3060-43	C9	SomaScan	KORA	cg21406869	0.0164419	15	68267607	39424868	39284140	5	TRANS
3060-43	C9	SomaScan	KORA	cg22202121	-0.0109894	6	87866253	39424868	39284140	5	TRANS
3060-43	C9	SomaScan	KORA	cg00291003	0.0065363	10	75541506	39424868	39284140	5	TRANS
3060-43	C9	SomaScan	KORA	cg22768358	0.00244597	11	113947148	39424868	39284140	5	TRANS
3060-43	C9	SomaScan	KORA	cg15474579	-0.00394762	6	36645812	39424868	39284140	5	TRANS
3060-43	C9	SomaScan	KORA	cg07676709	-0.00399101	17	46673442	39424868	39284140	5	TRANS
3060-43	C9	SomaScan	KORA	cg20893579	0.00527777	22	38215064	39424868	39284140	5	TRANS
3060-43	C9	SomaScan	KORA	cg01855760	5.48132e-05	4	68567075	39424868	39284140	5	TRANS
3060-43	C9	SomaScan	KORA	cg17527975	-0.0147493	8	142192487	39424868	39284140	5	TRANS
3060-43	C9	SomaScan	KORA	cg11065518	0.0234805	2	207630263	39424868	39284140	5	TRANS
3060-43	C9	SomaScan	KORA	cg14192542	-0.0041577	17	64187581	39424868	39284140	5	TRANS
3060-43	C9	SomaScan	KORA	cg20080548	-0.00853022	19	36020200	39424868	39284140	5	TRANS
3060-43	C9	SomaScan	KORA	cg19246761	-0.00812292	1	1549799	39424868	39284140	5	TRANS
3060-43	C9	SomaScan	KORA	cg13281719	0.00314636	2	234160162	39424868	39284140	5	TRANS
3060-43	C9	SomaScan	KORA	cg20544516	-0.00334119	17	17717183	39424868	39284140	5	TRANS
3060-43	C9	SomaScan	KORA	cg00884173	-0.000176575	16	84570044	39424868	39284140	5	TRANS
3060-43	C9	SomaScan	KORA	cg13302154	-0.0262657	12	15039432	39424868	39284140	5	TRANS
3060-43	C9	SomaScan	KORA	cg19693031	0.0592196	1	145441552	39424868	39284140	5	TRANS
3060-43	C9	SomaScan	KORA	cg03652336	-0.00236538	4	141017399	39424868	39284140	5	TRANS
3060-43	C9	SomaScan	KORA	cg22299097	-0.0111587	3	97690590	39424868	39284140	5	TRANS
3060-43	C9	SomaScan	KORA	cg06690548	0.0415529	4	139162808	39424868	39284140	5	TRANS
3060-43	C9	SomaScan	KORA	cg17129554	0.0173762	17	76993272	39424868	39284140	5	TRANS
3060-43	C9	SomaScan	KORA	cg12596182	-0.00737725	12	70082885	39424868	39284140	5	TRANS
3060-43	C9	SomaScan	KORA	cg10360420	0.00382351	19	54168850	39424868	39284140	5	TRANS
3060-43	C9	SomaScan	KORA	cg08035323	0.0177999	2	9843525	39424868	39284140	5	TRANS
3060-43	C9	SomaScan	KORA	cg24346659	-0.018619	8	142192468	39424868	39284140	5	TRANS
3060-43	C9	SomaScan	KORA	cg22437405	-0.00155475	1	38000170	39424868	39284140	5	TRANS
3060-43	C9	SomaScan	KORA	cg14074174	-0.0116075	19	7986206	39424868	39284140	5	TRANS
3060-43	C9	SomaScan	KORA	cg18055467	0.018356	9	129384767	39424868	39284140	5	TRANS
3060-43	C9	SomaScan	KORA	cg19114595	-0.00791697	1	68515977	39424868	39284140	5	TRANS
3060-43	C9	SomaScan	KORA	cg06208270	-0.000630046	1	156046344	39424868	39284140	5	TRANS
3060-43	C9	SomaScan	KORA	cg14634687	-0.00481128	17	47094252	39424868	39284140	5	TRANS
3060-43	C9	SomaScan	KORA	cg02068388	-0.00196075	5	107979173	39424868	39284140	5	TRANS
3060-43	C9	SomaScan	KORA	cg09370405	0.0279414	14	106834315	39424868	39284140	5	TRANS
3060-43	C9	SomaScan	KORA	cg25202367	0.0118104	6	110964408	39424868	39284140	5	TRANS
3060-43	C9	SomaScan	KORA	cg09153080	0.00361371	11	60739183	39424868	39284140	5	TRANS
3060-43	C9	SomaScan	KORA	cg06372654	-0.0105381	7	128044655	39424868	39284140	5	TRANS
3060-43	C9	SomaScan	KORA	cg10225525	-0.00128071	14	65876865	39424868	39284140	5	TRANS
3060-43	C9	SomaScan	KORA	cg14019670	0.0123272	11	129872845	39424868	39284140	5	TRANS
3060-43	C9	SomaScan	KORA	cg15910001	0.0215123	2	193060877	39424868	39284140	5	TRANS
3060-43	C9	SomaScan	KORA	cg14091103	-0.00296416	3	187870929	39424868	39284140	5	TRANS
3060-43	C9	SomaScan	KORA	cg12146151	-0.0190962	17	73716945	39424868	39284140	5	TRANS
3060-43	C9	SomaScan	KORA	cg01504447	-0.00619973	13	31041221	39424868	39284140	5	TRANS
3060-43	C9	SomaScan	KORA	cg14333338	-0.0140064	21	48026181	39424868	39284140	5	TRANS
3060-43	C9	SomaScan	KORA	cg24954210	0.00612139	3	62856521	39424868	39284140	5	TRANS
3060-43	C9	SomaScan	KORA	cg17651821	-0.00091519	6	27841683	39424868	39284140	5	TRANS
3060-43	C9	SomaScan	KORA	cg06994832	-0.00267801	1	38830514	39424868	39284140	5	TRANS
3060-43	C9	SomaScan	KORA	cg14267671	-0.00070668	19	45572412	39424868	39284140	5	TRANS
3060-43	C9	SomaScan	KORA	cg02741985	-0.00272292	17	80059408	39424868	39284140	5	TRANS
3060-43	C9	SomaScan	KORA	cg02130555	0.000230744	4	40811505	39424868	39284140	5	TRANS
3060-43	C9	SomaScan	KORA	cg18366249	0.000782682	2	240499954	39424868	39284140	5	TRANS
3060-43	C9	SomaScan	KORA	cg13387869	0.0140666	8	24776195	39424868	39284140	5	TRANS
3079-62	RARRES2	SomaScan	KORA	cg23760687	-0.00272766	13	25621735	150341662	150338317	7	TRANS
3079-62	RARRES2	SomaScan	KORA	cg20611680	0.00812897	1	16554171	150341662	150338317	7	TRANS
3079-62	RARRES2	SomaScan	KORA	cg03697316	0.000930431	22	21336741	150341662	150338317	7	TRANS
3079-62	RARRES2	SomaScan	KORA	cg24369728	-0.019424	10	77472158	150341662	150338317	7	TRANS
3079-62	RARRES2	SomaScan	KORA	cg06387204	-0.00531147	11	22647648	150341662	150338317	7	TRANS
3079-62	RARRES2	SomaScan	KORA	cg25470077	0.00700872	19	10406364	150341662	150338317	7	TRANS
3079-62	RARRES2	SomaScan	KORA	cg07537417	0.0103474	18	74332553	150341662	150338317	7	TRANS
3079-62	RARRES2	SomaScan	KORA	cg07207833	-0.00679865	1	16464416	150341662	150338317	7	TRANS
3079-62	RARRES2	SomaScan	KORA	cg08823186	-0.0152892	16	347294	150341662	150338317	7	TRANS
3079-62	RARRES2	SomaScan	KORA	cg06641299	-0.00504682	1	228136127	150341662	150338317	7	TRANS
3079-62	RARRES2	SomaScan	KORA	cg16989117	-0.0208629	1	40781907	150341662	150338317	7	TRANS
3079-62	RARRES2	SomaScan	KORA	cg19845127	-0.0124263	8	1320565	150341662	150338317	7	TRANS
3079-62	RARRES2	SomaScan	KORA	cg23752651	0.000502419	12	6442966	150341662	150338317	7	TRANS
3079-62	RARRES2	SomaScan	KORA	cg05801338	0.0150176	6	79788076	150341662	150338317	7	TRANS
3079-62	RARRES2	SomaScan	KORA	cg09493652	0.0194536	7	97601644	150341662	150338317	7	TRANS
3079-62	RARRES2	SomaScan	KORA	cg14497847	-0.00404784	14	99947303	150341662	150338317	7	TRANS
3079-62	RARRES2	SomaScan	KORA	cg03303162	-0.000536595	19	12946300	150341662	150338317	7	TRANS
3079-62	RARRES2	SomaScan	KORA	cg16900796	-0.000649907	19	10755136	150341662	150338317	7	TRANS
3079-62	RARRES2	SomaScan	KORA	cg11081703	0.00735684	12	108909056	150341662	150338317	7	TRANS
3079-62	RARRES2	SomaScan	KORA	cg19267259	0.00246652	1	6453427	150341662	150338317	7	TRANS
3079-62	RARRES2	SomaScan	KORA	cg11733430	0.00361919	6	33262740	150341662	150338317	7	TRANS
3079-62	RARRES2	SomaScan	KORA	cg18468088	0.0109612	6	35490818	150341662	150338317	7	TRANS
3079-62	RARRES2	SomaScan	KORA	cg20050012	0.0105044	17	26971809	150341662	150338317	7	TRANS
3079-62	RARRES2	SomaScan	KORA	cg05192145	0.00373754	16	30832346	150341662	150338317	7	TRANS
3079-62	RARRES2	SomaScan	KORA	cg17109461	0.00696541	6	31940352	150341662	150338317	7	TRANS
3079-62	RARRES2	SomaScan	KORA	cg13731504	0.00463936	9	139222320	150341662	150338317	7	TRANS
3079-62	RARRES2	SomaScan	KORA	cg23994692	-0.001481	2	42396456	150341662	150338317	7	TRANS
3079-62	RARRES2	SomaScan	KORA	cg26257814	0.0565987	19	50553708	150341662	150338317	7	TRANS
3079-62	RARRES2	SomaScan	KORA	cg06134546	0.001877	15	64753130	150341662	150338317	7	TRANS
3079-62	RARRES2	SomaScan	KORA	cg09322003	-0.0208363	7	155584248	150341662	150338317	7	CIS
3079-62	RARRES2	SomaScan	KORA	cg07058528	-0.00517559	17	6918698	150341662	150338317	7	TRANS
3079-62	RARRES2	SomaScan	KORA	cg19305293	-0.0123754	2	228190660	150341662	150338317	7	TRANS
[truncated: 8,272 more rows]

## Sheet: 1F
1F. CpG feature counts for the 109 EpiScores selected for projection into Generation Scotland.
Identifier	Protein	CpG count
3343-1	ACY1	395
3519-3	CCL17	364
3485-28	B2M	311
2851-63	C5	263
4924-32	MMP1	262
4153-11	SERPINA3	258
4496-60	MMP12	257
CXCL10	CXCL10	196
4141-79	CXCL10	194
5000-52	LGALS3BP	186
3339-33	THBS2	183
5358-3	OMD	180
4990-87	GP1BA	179
CXCL11	CXCL11	176
3029-52	CD209	163
3291-30	FCER2	163
4568-17	SLITRK5	161
VEGFA	VEGFA	159
4407-10	MST1	156
4435-66	ENPP7	156
5028-59	CD163	151
2658-27	NTRK3	148
5124-69	ICAM5	132
3293-2	CD5L	127
3470-1	SELE	126
OSM	OSM	125
3324-51	LY9	124
4498-62	NCAM1	121
2771-35	IGFBP1	120
3044-3	CCL18	119
NTRK3	NTRK3	118
3079-62	RARRES2	117
3600-2	CHIT1	111
SMPD1	SMPD1	110
3060-43	C9	109
2948-58	GHR	108
4500-50	CLEC11A	107
3403-1	TPSB2	106
2665-26	TNFRSF17	103
3440-7	GZMA	103
FGF.21	FGF.21	103
3311-27	FCGR3B	102
4337-49	CRP	100
TGF.alpha	TGF.alpha	100
4831-4	SELL	99
2516-57	CCL21	98
2579-17	MMP9	96
3152-57	TNFRSF1B	83
2966-65	CLEC11A	82
EN.RAGE	EN.RAGE	82
3035-80	IL19	81
G.CSF	G.CSF	79
5029-3	FAP	74
2950-57	IGFBP4	72
HGF	HGF	72
2687-2	MIA	69
4929-55	SHBG	68
SKR3	SKR3	68
3169-70	IDUA	67
3348-49	BMP1	67
3505-6	LTA|LTB	67
3235-50	WFIKKN2	66
CRTAM	CRTAM	64
5491-12	SPOCK2	62
4930-21	STC1	61
2705-5	CCL25	59
2982-82	LGALS4	58
4148-49	PAPPA	58
CXCL9	CXCL9	56
3805-16	ESM1	55
3195-50	GNLY	52
3316-58	SERPIND1	52
2780-35	LTF	51
3038-9	CXCL11	51
3175-51	ADAMTS13	51
3448-13	INSR	51
5363-51	SEMA3E	51
N.CDase	N.CDase	50
3298-52	CNTN4	45
CCL11	CCL11	45
NMNAT1	NMNAT1	44
3473-78	MPL	41
CD6	CD6	41
3554-24	ADIPOQ	39
FcRL2	FcRL2	38
4763-31	AFM	37
3508-78	CCL22	36
2580-83	MPO	35
NEP	NEP	34
MMP.1	MMP.1	34
5107-7	NOTCH1	33
2967-8	VCAM1	32
EZR	EZR	32
GDF.8	GDF.8	29
SIGLEC1	SIGLEC1	28
3216-2	PIGR	27
5339-49	S100A9	27
3184-25	F7	26
5034-79	PRSS2	25
3046-31	RETN	21
3617-80	HGFAC	20
3041-55	MRC2	17
3292-75	CD48	17
4481-34	C4A|C4B	17
GZMA	GZMA	13
2826-53	EDA	10
2816-50	BCAM	1
4160-49	MMP2	1
4920-10	LYZ	1

## Sheet: 1G
1G. The frequency of CpG sites selected as contributing features to the 109 DNAm protein EpiScores which were selected from the holdout and test set analyses. Frequency of CpG contributions is provided across all EpiScores. Names of the EpiScores that each CpG contributes to and rait annotations from the EWAS catalogue with P < 3.6e-8 from the EWAS catalogue are also included.
CpG site	Count	Annotation from EWAS Catalogue	EpiScores this CpG is included as a feature for
cg05575921	25	Smoking, Maternal smoking during pregnancy, Maternal smoking in pregnancy, Body mass index, Waist circumference, Lung cancer, Serum cotinine, C-reactive protein, Tobacco smoking, Educational attainment	MMP9, NTRK3, PIGR, WFIKKN2, CNTN4, SERPIND1, LY9, CCL22, CCL17, ESM1, MMP12, SLITRK5, FAP, ICAM5, OMD, SEMA3E, SKR3, CCL11, EN.RAGE, FGF.21, HGF, OSM, TGF.alpha, VEGFA
cg06690548	24	Alcohol consumption per day, C-reactive protein, Body mass index, Serum triglycerides, Alanine aminotransferase, Gamma-glutamyl transferase	CCL21, MIA, IGFBP1, IGFBP4, LGALS4, C9, ADAMTS13, PIGR, CNTN4, ACY1, SELE, ADIPOQ, ENPP7, NCAM1, SELL, SHBG, PRSS2, NOTCH1, OMD, NEP, NTRK3, CXCL10, CXCL9, FGF.21
cg06500161	21	HOMA-IR, High-density lipoprotein cholesterol, Triglycerides, Body mass index, Waist circumference, Type II diabetes, Hypertriglyceridemic waist, 2-hour glucose, Fasting glucose, Fasting insulin, Postprandial lipemia, Age 4 vs age 0, Serum high-density lipoprotein cholesterol, Serum triglycerides	IGFBP1, C5, GHR, LGALS4, CCL18, TNFRSF1B, THBS2, ACY1, SELE, ADIPOQ, SERPINA3, AFM, SELL, SHBG, STC1, LGALS3BP, CD163, PRSS2, OMD, N.CDase, FGF.21
cg07839457	19	Rheumatoid arthritis, Clear cell renal carcinoma, Age, Autoantibody production in systemic lupus erythematosus, Sex, HIV infection, Human immunodeficiency virus, Serum total cholesterol	VCAM1, CXCL11, CCL18, TNFRSF1B, CD48, CD5L, FCGR3B, LY9, BMP1, GZMA, B2M, CXCL10, SELL, CD163, CRTAM, SIGLEC1, CXCL9
cg00574958	17	Triglycerides, Very low-density lipoprotein cholesterol, Body mass index, Waist circumference, Hypertriglyceridemic waist, Gestational age, Postprandial lipemia, Alcohol consumption per day, Plasma adiponectin, Serum triglycerides, Gamma-glutamyl transferase	CCL25, IGFBP1, C5, GHR, LGALS4, CCL18, WFIKKN2, ACY1, SELE, ADIPOQ, SERPINA3, ENPP7, SLITRK5, AFM, SHBG, GP1BA, FGF.21
cg14476101	15	Body mass index, Waist circumference, Alcohol consumption per day, C-reactive protein, Age 4 vs age 0, Serum triglycerides, Gamma-glutamyl transferase	NTRK3, IGFBP1, C5, GHR, CD209, THBS2, ACY1, SELE, SERPINA3, CRP, NCAM1, SHBG, LGALS3BP, NOTCH1
cg17501210	13	Sex, Gestational age, Body mass index, Inflammatory bowel disease, C-reactive protein, Serum high-density lipoprotein cholesterol, Serum triglycerides	NTRK3, C5, CD209, TNFRSF1B, ADAMTS13, CNTN4, CRP, ENPP7, SLITRK5, FAP, NOTCH1, OMD
cg11024682	12	Triglycerides, Body mass index, Waist circumference, Type II diabetes, Fasting glucose, Postprandial lipemia, C-reactive protein, Age 4 vs age 0, Serum high-density lipoprotein cholesterol, Serum triglycerides, High-density lipoprotein cholesterol	CCL21, IGFBP1, C5, IGFBP4, LGALS4, CCL18, ACY1, MMP12, SHBG, STC1, LGALS3BP, CD163
cg11643285	11	Sex, Fruit consumption	CCL21, IGFBP1, C9, GNLY, ACY1, BMP1, SELE, LTA|LTB, ADIPOQ, SHBG, STC1
cg16411857	11	Rheumatoid arthritis, Clear cell renal carcinoma, Fetal vs adult liver, Autoantibody production in systemic lupus erythematosus, Primary Sjogrens syndrome, HIV infection, Human immunodeficiency virus, Alcohol consumption per day	CXCL11, GNLY, CD5L, BMP1, GZMA, B2M, CXCL10, CD163, CRTAM, FcRL2
cg03636183	10	Smoking, Lung cancer, Serum cotinine, Tobacco smoking, Educational attainment	NTRK3, ADAMTS13, PIGR, FCER2, LY9, LTA|LTB, SLITRK5, ICAM5, VEGFA
cg03725309	10	Fetal vs adult liver, Age, Ageing, Primary Sjogrens syndrome, Gestational age, C-reactive protein, Body mass index, Age 4 vs age 0, Serum triglycerides	NTRK3, EDA, C5, RARRES2, ADAMTS13, B2M, MMP2, CRP, SLITRK5, NOTCH1
cg19693031	9	Fetal vs adult liver, Triglycerides, Ageing, Type II diabetes, Sex, HbA1c, Alcohol consumption per day, Serum triglycerides	CCL25, C9, THBS2, ACY1, SELE, SERPINA3, ENPP7, AFM, LGALS3BP
cg16867657	8	Clear cell renal carcinoma, Age, Fetal vs adult liver, Ageing, Primary Sjogrens syndrome, Age 4 vs age 0	CCL18, RARRES2, TNFRSF1B, B2M, CHIT1, CXCL10, MMP12, STC1
cg21566642	8	Smoking, Lung cancer, Serum cotinine, Alcohol consumption per day, Age 4 vs age 0, Tobacco smoking, Educational attainment	NTRK3, WFIKKN2, SERPIND1, MMP12, NCAM1, SLITRK5, OMD
cg02711608	7	Gestational age, Alcohol consumption per day, C-reactive protein, Body mass index, Serum triglycerides, Gamma-glutamyl transferase	C5, LGALS4, ADAMTS13, NCAM1, SELL, STC1, NOTCH1
cg06192883	7	Fetal vs adult liver, Body mass index, Waist circumference, Primary Sjogrens syndrome, C-reactive protein, Serum high-density lipoprotein cholesterol	NTRK3, FCGR3B, THBS2, ENPP7, STC1, CD163, S100A9
cg06624020	7		ADAMTS13, ESM1, GP1BA, LGALS3BP, FAP, ICAM5, SPOCK2
cg07504977	7	Clear cell renal carcinoma, Fetal vs adult liver, Triglycerides, Gestational age, Body mass index, Waist circumference, Serum triglycerides	IGFBP4, CCL18, WFIKKN2, ADIPOQ, NCAM1, SLITRK5, OMD
cg10882886	7		GZMA, MPL, ESM1, MMP12, SLITRK5, LGALS3BP, FAP
cg03618918	6	Sex	CCL21, F7, GNLY, SELE, LTA|LTB, ADIPOQ
cg07190917	6	Rheumatoid arthritis	NTRK3, IL19, CNTN4, NCAM1, OMD, SPOCK2
cg10636246	6	Ageing, Primary Sjogrens syndrome, Gestational age, C-reactive protein, Body mass index	MRC2, NCAM1, SLITRK5, OMD, G.CSF, NTRK3
cg15342087	6	Smoking, Pancreatic ductal adenocarcinoma, Gestational age, Serum cotinine, Tobacco smoking, Educational attainment	C5, IGFBP4, ADAMTS13, CNTN4, CRP, MMP12
cg26102082	6		SLITRK5, CCL11, EN.RAGE, HGF, OSM, VEGFA
cg01681367	5	Rheumatoid arthritis, Clear cell renal carcinoma, Primary Sjogrens syndrome, Smoking	CXCL11, CD163, CXCL10, CXCL9
cg01881899	5	Body mass index, Serum triglycerides, Gamma-glutamyl transferase	CCL21, WFIKKN2, ACY1, CXCL10, SIGLEC1
cg05168141	5		VCAM1, CCL17, ESM1, FAP, SPOCK2
cg05358715	5		EN.RAGE, HGF, OSM, TGF.alpha, VEGFA
cg05438378	5	Ageing, Gestational age, Age 4 vs age 0	SERPINA3, ENPP7, SLITRK5, SELL, OMD
cg07628841	5	Sex	C9, ACY1, ADIPOQ, SLITRK5, OMD
cg07794010	5		EN.RAGE, HGF, OSM, TGF.alpha, VEGFA
cg08173263	5	Gestational age, Smoking	ACY1, MPL, ENPP7, SELL, GP1BA
cg08376310	5	Clear cell renal carcinoma, Right vs left colon adenomas, Gestational age, Age 4 vs age 0	EN.RAGE, HGF, OSM, TGF.alpha, VEGFA
cg10649130	5	Clear cell renal carcinoma, Pancreatic ductal adenocarcinoma	EN.RAGE, HGF, OSM, TGF.alpha, VEGFA
cg11231069	5	Clear cell renal carcinoma	EN.RAGE, HGF, OSM, TGF.alpha, VEGFA
cg12802093	5		EN.RAGE, HGF, OSM, TGF.alpha, VEGFA
cg14522441	5		EN.RAGE, HGF, OSM, TGF.alpha, VEGFA
cg18236745	5		ESM1, GP1BA, FAP, ICAM5, SPOCK2
cg26403843	5	Clear cell renal carcinoma, Pancreatic ductal adenocarcinoma, Body mass index change, Body mass index, Waist circumference	IGFBP1, WFIKKN2, ACY1, ADIPOQ, SERPINA3
cg26703534	5	Smoking, Serum cotinine, Maternal smoking in pregnancy, Tobacco smoking	LTF, SERPIND1, TPSB2, CXCL10, CXCL11
cg27243685	5	Triglycerides, Body mass index, Waist circumference, Serum high-density lipoprotein cholesterol, Serum triglycerides, High-density lipoprotein cholesterol	CCL25, SHBG, LGALS3BP, NEP, FGF.21
cg00310412	4	Smoking, Serum cotinine, Tobacco smoking, Educational attainment	WFIKKN2, ENPP7, SLITRK5, LGALS3BP
cg01078446	4		CD6, CXCL11, HGF, VEGFA
cg02650017	4	Type II diabetes, Primary Sjogrens syndrome, C-reactive protein, Body mass index, Serum high-density lipoprotein cholesterol	NTRK3, B2M, NCAM1, OMD
cg02892925	4	Gestational age, Maternal smoking in pregnancy	HGF, OSM, TGF.alpha, VEGFA
cg03172931	4	Gestational age	WFIKKN2, ADIPOQ, ESM1, NCAM1
cg03411579	4	Gestational age, Ageing, Schizophrenia	EN.RAGE, OSM, TGF.alpha, VEGFA
cg03507593	4	Pancreatic ductal adenocarcinoma, Smoking	EN.RAGE, OSM, TGF.alpha, VEGFA
cg03547181	4		CXCL9, HGF, TGF.alpha, VEGFA
cg03807873	4		EN.RAGE, HGF, TGF.alpha, VEGFA
cg04468741	4	Pancreatic ductal adenocarcinoma, Gestational age	CXCL10, EN.RAGE, OSM, VEGFA
cg04689082	4		BCAM, HGFAC, ESM1, MMP1
cg04757345	4		MIA, GHR, WFIKKN2, GP1BA
cg05278442	4		GHR, C9, FCGR3B, ACY1
cg07068382	4	Gestational age, Sex	CCL21, IGFBP1, ACY1, LGALS3BP
cg07167185	4	Gestational age, Sex, Maternal smoking in pregnancy	ACY1, MPL, SERPINA3, STC1
cg07573872	4	Clear cell renal carcinoma, Pancreatic ductal adenocarcinoma, Body mass index, Growth differentiation factor 15, Gestational age, C-reactive protein	ADAMTS13, CNTN4, CRP, VEGFA
cg07626482	4	Clear cell renal carcinoma, Smoking, C-reactive protein, Gamma-glutamyl transferase	LGALS4, THBS2, GDF.8, FGF.21
cg09349128	4	Fetal vs adult liver, Body mass index, Growth differentiation factor 15, Primary Sjogrens syndrome, Gestational age, Inflammatory bowel disease	IL19, CRP, NOTCH1, G.CSF
cg09469355	4	Smoking, Sex, Age 4 vs age 0	CCL25, ACY1, BMP1, ADIPOQ
cg10624395	4	Rheumatoid arthritis	EN.RAGE, HGF, OSM, TGF.alpha
cg10727654	4	Rheumatoid arthritis	B2M, CCL22, CCL17, SPOCK2
cg12806681	4	Smoking, Maternal smoking during pregnancy, Maternal smoking in pregnancy, Tobacco smoking	NTRK3, IGFBP4, CCL17, EN.RAGE
cg14109551	4	Clear cell renal carcinoma	CXCL10, CD6, EN.RAGE, OSM
cg14225168	4	Gestational age	EN.RAGE, HGF, OSM, TGF.alpha
cg17922283	4		CD48, ESM1, ICAM5, SPOCK2
cg18181703	4	Type II diabetes, Primary Sjogrens syndrome, Body mass index, Smoking, Alcohol consumption per day, C-reactive protein	C5, CCL18, RARRES2, CRP
cg18315708	4		EN.RAGE, HGF, OSM, TGF.alpha
cg18384460	4		EN.RAGE, OSM, TGF.alpha, VEGFA
cg18748374	4	Fetal vs adult liver, Gestational age, Age 4 vs age 0	HGF, OSM, TGF.alpha, VEGFA
cg19267259	4	HIV infection	IL19, RARRES2, B2M, HGFAC
cg21161138	4	Smoking, Maternal smoking during pregnancy, Serum cotinine, Maternal smoking in pregnancy, Educational attainment	PIGR, CCL17, SLITRK5, GDF.8
cg23387863	4	Fetal vs adult liver, Primary Sjogrens syndrome, Smoking	CCL18, FCGR3B, B2M, CCL11
cg25508605	4	Ageing	ACY1, CRP, SLITRK5, STC1
cg27405128	4		CD6, EN.RAGE, OSM, TGF.alpha
cg00032756	3		BMP1, GP1BA, SEMA3E
cg00129811	3		OSM, TGF.alpha, VEGFA
cg00462311	3	Rheumatoid arthritis	CCL22, CCL17, CRP
cg00908271	3		EN.RAGE, OSM, TGF.alpha
cg00942551	3	Rheumatoid arthritis	GZMA, MPL, SLITRK5
cg00994936	3	Body mass index	IGFBP1, GHR, SELE
cg01243823	3	Fetal vs adult liver, Ageing, Sex, C-reactive protein, Body mass index, Age 4 vs age 0	ENPP7, SLITRK5, CD163
cg01829024	3		MPO, CD163, FcRL2
cg01940273	3	Smoking, Sex, Wellbeing, Serum cotinine, Alcohol consumption per day, Age 4 vs age 0, Tobacco smoking, Educational attainment	MMP12, MMP1, OMD
cg02202022	3		CXCL10, CXCL11, CXCL9
cg02638348	3	Gestational age	CD209, WFIKKN2, CLEC11A
cg02816363	3	Rheumatoid arthritis	OSM, TGF.alpha, VEGFA
cg02973171	3	Clear cell renal carcinoma, Age, Ageing, Age 4 vs age 0	VCAM1, B2M, CHIT1
cg03329539	3	Smoking, Serum cotinine, Alcohol consumption per day, Tobacco smoking	MIA, MMP1, SKR3
cg03450842	3	Clear cell renal carcinoma, Smoking, Maternal smoking in pregnancy, Gestational age, Alcohol consumption per day, Tobacco smoking	NTRK3, LTF, CCL22
cg03503785	3		MIA, NCAM1, OMD
cg03915012	3	Rheumatoid arthritis, Age, Primary Sjogrens syndrome	FCER2, B2M, CXCL10
cg04199473	3	Rheumatoid arthritis, Fetal vs adult liver	IL19, CNTN4, NOTCH1
cg04542977	3	Gestational age, Ageing, Primary Sjogrens syndrome, Age 4 vs age 0	CD5L, FCGR3B, LY9
cg04659154	3		CXCL10, CXCL11, CXCL9
cg04987734	3	Ageing, Smoking, Alcohol consumption per day, C-reactive protein	STC1, FAP, NEP
cg04988978	3	Clear cell renal carcinoma, Gestational age, Ageing	EN.RAGE, HGF, TGF.alpha
cg05165982	3	Primary Sjogrens syndrome	CXCL10, CXCL11, CXCL9
cg05304729	3	Clear cell renal carcinoma, Sex, Primary Sjogrens syndrome	CXCL10, CXCL11, CXCL9
cg05501357	3	Clear cell renal carcinoma, Primary Sjogrens syndrome, Gestational age	EN.RAGE, OSM, TGF.alpha
cg05540716	3	Gestational age	NTRK3, SLITRK5, OMD
cg05925497	3	Fetal vs adult liver, Sex, Age 4 vs age 0, Age	WFIKKN2, ADIPOQ, SHBG
cg05952672	3		CD5L, LY9, GZMA
cg06760077	3	Sex	EN.RAGE, OSM, TGF.alpha
cg07025011	3		RARRES2, B2M, CRP
cg07031070	3	Gestational age	EN.RAGE, HGF, OSM
cg07676709	3	Clear cell renal carcinoma, Sex, Age 4 vs age 0	C5, C9, CRP
cg07731047	3		ESM1, FAP, SPOCK2
cg08825291	3	Smoking	HGF, TGF.alpha, VEGFA
cg09092525	3	Sex	ACY1, ENPP7, LGALS3BP
cg09809720	3		HGF, OSM, TGF.alpha
cg10045909	3	Clear cell renal carcinoma	EN.RAGE, OSM, TGF.alpha
cg10195814	3		HGF, OSM, TGF.alpha
cg10311104	3	Schizophrenia	EN.RAGE, OSM, TGF.alpha
cg10420542	3		CXCL10, CXCL11, VEGFA
cg10518543	3		HGF, OSM, VEGFA
cg10919522	3	Clear cell renal carcinoma, Smoking, Fetal vs adult liver, C-reactive protein, Body mass index	SERPIND1, ENPP7, NTRK3
cg11252953	3		ADAMTS13, B2M, AFM
cg11835347	3	Smoking, Age 4 vs age 0	VCAM1, RETN, LY9
cg12458003	3	Body mass index	RARRES2, B2M, SKR3
cg13066481	3	Fetal vs adult liver, Age 4 vs age 0, Age	HGF, OSM, VEGFA
cg13138952	3	Rheumatoid arthritis	IDUA, ACY1, ENPP7
cg13209683	3		HGF, TGF.alpha, VEGFA
cg13677111	3	Rheumatoid arthritis	HGF, OSM, TGF.alpha
cg13794530	3	Clear cell renal carcinoma, Pancreatic ductal adenocarcinoma, HIV infection	FCGR3B, THBS2, PAPPA
cg13984040	3	Clear cell renal carcinoma, Pancreatic ductal adenocarcinoma, Fetal vs adult liver, Ageing	RETN, TGF.alpha, VEGFA
cg14457610	3		HGF, OSM, TGF.alpha
cg15020801	3	C-reactive protein, Age 4 vs age 0	PIGR, ACY1, SLITRK5
cg15551881	3	Rheumatoid arthritis, Clear cell renal carcinoma, Primary Sjogrens syndrome, C-reactive protein, Serum high-density lipoprotein cholesterol	CCL18, CD163, SIGLEC1
cg15563184	3	Clear cell renal carcinoma	EN.RAGE, OSM, TGF.alpha
cg15644756	3	Clear cell renal carcinoma, Pancreatic ductal adenocarcinoma, Gestational age	ADAMTS13, ESM1, SPOCK2
cg15742515	3	Gestational age	WFIKKN2, THBS2, GP1BA
cg16238336	3		FCER2, LY9, NCAM1
cg16419235	3	Clear cell renal carcinoma, Age	VCAM1, FCER2, INSR
cg16434190	3	Age 4 vs age 0	S100A9, OSM, TGF.alpha
cg17038235	3	Smoking, Fetal vs adult liver, Sex	CLEC11A, PAPPA, AFM
cg17287155	3	Smoking, Body mass index, Primary Sjogrens syndrome, Gestational age, Tobacco smoking	FCGR3B, ICAM5, CXCL11
cg17378803	3	Alcohol consumption per day	WFIKKN2, ACY1, SLITRK5
cg17536822	3	Clear cell renal carcinoma, Pancreatic ductal adenocarcinoma, Gestational age	CXCL10, CXCL11, CXCL9
cg17827328	3	Clear cell renal carcinoma	EN.RAGE, OSM, TGF.alpha
cg17835016	3	Sex	CXCL10, HGF, VEGFA
cg17900127	3	Gestational age	CXCL10, CXCL11, CXCL9
cg17901584	3	Fetal vs adult liver, Waist circumference, Sex, Gestational age, Body mass index, High-density lipoprotein cholesterol, Triglycerides, Serum high-density lipoprotein cholesterol, Serum total cholesterol, Serum triglycerides	RETN, HGF, TGF.alpha
cg18346531	3		MMP9, LTF, GP1BA
cg18650367	3		SERPIND1, LY9, GZMA
cg19162300	3		CXCL11, B2M, CXCL10
cg19295068	3	Gestational age	IL19, RETN, C9
cg19377607	3		TPSB2, CXCL10, CXCL11
cg19458497	3	Sex, Age 4 vs age 0	IGFBP1, GHR, ACY1
cg19750657	3	Body mass index, Age 4 vs age 0, Serum high-density lipoprotein cholesterol	C5, ADIPOQ, N.CDase
cg19750882	3	Rheumatoid arthritis	CXCL10, CXCL11, VEGFA
cg19929123	3	Rheumatoid arthritis	CXCL10, CXCL11, VEGFA
cg20059928	3	Fetal vs adult liver, Smoking, Gestational age, Age 4 vs age 0	HGF, TGF.alpha, VEGFA
cg20217649	3		NTRK3, C5, LGALS4
cg20320946	3		VCAM1, CCL17, ICAM5
cg20415170	3		HGF, OSM, TGF.alpha
cg20536364	3	Primary Sjogrens syndrome, Age	TNFRSF1B, B2M, MMP.1
cg20977312	3	Gestational age	EN.RAGE, OSM, TGF.alpha
cg21232015	3	Age, Ageing, Primary Sjogrens syndrome, Gestational age	CCL18, TNFRSF1B, STC1
cg21389309	3		CXCL10, CXCL11, CXCL9
cg22426329	3		B2M, NCAM1, SHBG
cg22454769	3	Age, Fetal vs adult liver, Ageing, Primary Sjogrens syndrome, Age 4 vs age 0	CCL18, CHIT1, SELL
cg22506801	3		CXCL10, CXCL11, CXCL9
cg23391288	3	Rheumatoid arthritis, Clear cell renal carcinoma, Pancreatic ductal adenocarcinoma	EN.RAGE, HGF, TGF.alpha
cg23500537	3	Age, Fetal vs adult liver, Age 4 vs age 0	CCL18, B2M, STC1
cg23609571	3		EN.RAGE, OSM, TGF.alpha
cg23814743	3	Sex	BMP1, ADIPOQ, SHBG
cg24204406	3		C5, GHR, BMP1
cg24822825	3		EN.RAGE, OSM, VEGFA
cg25010805	3		MPL, CXCL10, SLITRK5
cg25189904	3	Smoking, Maternal smoking during pregnancy, Gestational age, Sex, Serum cotinine, Maternal smoking in pregnancy, Tobacco smoking, Educational attainment	SERPIND1, BMP1, VEGFA
cg25329734	3	Rheumatoid arthritis, Clear cell renal carcinoma, Fetal vs adult liver	FCGR3B, THBS2, B2M
cg25770698	3		NTRK3, RARRES2, NCAM1
cg25843003	3	Clear cell renal carcinoma, Autoantibody production in systemic lupus erythematosus, Sex, HIV infection, Gestational age	CXCL11, B2M
cg26257814	3		IGFBP4, RARRES2, B2M
cg26312951	3	Fetal vs adult liver, Autoantibody production in systemic lupus erythematosus, Primary Sjogrens syndrome, Alcohol consumption per day	NTRK3, FcRL2, SIGLEC1
cg26691434	3	Fetal vs adult liver, Primary Sjogrens syndrome	CCL18, B2M, CXCL10
cg27050612	3	Clear cell renal carcinoma, Gestational age, Primary Sjogrens syndrome, HIV infection, C-reactive protein, Body mass index	HGF, TGF.alpha, VEGFA
cg27209729	3	Ageing, Primary Sjogrens syndrome, Age	VCAM1, TNFRSF1B, THBS2
cg00008629	2	Pancreatic ductal adenocarcinoma, Alcohol consumption per day, Age	MPL, GP1BA
cg00121465	2		IDUA, OMD
cg00134210	2	Clear cell renal carcinoma, Ageing	ADIPOQ, SELL
cg00210249	2	Smoking, Age 4 vs age 0	ADIPOQ, OMD
cg00218406	2	Clear cell renal carcinoma, Autoantibody production in systemic lupus erythematosus, HIV infection	SIGLEC1, CXCL11
cg00230120	2		THBS2, CD163
cg00259097	2	Rheumatoid arthritis, Ageing, Primary Sjogrens syndrome, Gestational age, Age 4 vs age 0	TNFRSF1B, CD163
cg00329615	2	Fetal vs adult liver, Gestational age, Ageing, Primary Sjogrens syndrome	FCER2, CHIT1
cg00362322	2		NTRK3, NCAM1
cg00394316	2	Ageing	FCER2, MMP12
cg00397324	2		C5, CCL17
cg00419333	2	Rheumatoid arthritis	EN.RAGE, VEGFA
cg00420347	2		RARRES2, NCAM1
cg00441709	2	Sex, Body mass index	IGFBP1, SHBG
cg00486627	2	Rheumatoid arthritis	B2M, ICAM5
cg00511731	2		CXCL10, CXCL11
cg00542975	2	Clear cell renal carcinoma, Smoking, Gestational age, Age 4 vs age 0	VCAM1, FCGR3B
cg00607196	2		C5, BMP1
cg00621838	2	Rheumatoid arthritis	CLEC11A
cg00645731	2		G.CSF, OSM
cg00645897	2		SERPINA3, SLITRK5
cg00677866	2		CXCL10, CXCL11
cg00695799	2	Age, Gestational age, Sex, Age 4 vs age 0, Smoking	LGALS4, RARRES2
cg00707688	2		CNTN4, MMP1
cg00758915	2		FCER2, LTA|LTB
cg00812761	2	Rheumatoid arthritis, Gestational age, C-reactive protein	B2M, CD163
cg00878630	2	Rheumatoid arthritis	B2M, SPOCK2
cg00908828	2		MMP12, PRSS2
cg00957901	2	Ageing	LY9, SLITRK5
cg00971034	2		HGF, VEGFA
cg00973309	2	Clear cell renal carcinoma, Pancreatic ductal adenocarcinoma	MIA, CRP
cg00977903	2		EZR, NMNAT1
cg00993308	2	Clear cell renal carcinoma	THBS2, SEMA3E
cg01027739	2		VCAM1, SERPINA3
cg01065599	2	Fetal vs adult liver	LY9, ACY1
cg01077808	2	Rheumatoid arthritis	IL19, INSR
cg01082057	2		INSR, MMP12
cg01203153	2	Sex, Age 4 vs age 0	FAP, VEGFA
cg01217815	2	Clear cell renal carcinoma	IGFBP4, NCAM1
cg01225698	2	Rheumatoid arthritis, Ageing	IDUA, OMD
cg01256539	2	Age	C5, IGFBP4
cg01311537	2	Age 4 vs age 0	MRC2, FAP
cg01366698	2		B2M, CXCL10
cg01422467	2	Pancreatic ductal adenocarcinoma	NTRK3, NCAM1
cg01434559	2	Sex	EN.RAGE, OSM
cg01447660	2	Age, Age 4 vs age 0	BMP1, SHBG
cg01502116	2		HGF, TGF.alpha
cg01543300	2	Clear cell renal carcinoma	CCL17, SERPINA3
cg01547142	2		CCL18, THBS2
cg01620569	2	Rheumatoid arthritis	SLITRK5, ICAM5
cg01848115	2		ACY1, CXCL11
cg01911191	2	Rheumatoid arthritis	ACY1, MMP1
cg01959716	2		LY9, CHIT1
cg01960979	2	Sex	CCL18, MMP12
cg01974091	2	Clear cell renal carcinoma, Primary Sjogrens syndrome	CLEC11A
cg02064366	2	Clear cell renal carcinoma	C5, WFIKKN2
cg02068690	2	Primary Sjogrens syndrome, Smoking	CCL21, CCL18
cg02119577	2		EZR, NMNAT1
cg02128564	2	Rheumatoid arthritis	CXCL11, CXCL9
cg02152233	2		LGALS3BP, G.CSF
cg02328239	2		RARRES2, B2M
cg02407308	2		C5, ENPP7
cg02474076	2		SEMA3E, SPOCK2
cg02474625	2	Clear cell renal carcinoma	NTRK3, NOTCH1
cg02475834	2		EN.RAGE, OSM
cg02479773	2	Rheumatoid arthritis, Clear cell renal carcinoma	CHIT1, MMP12
cg02583484	2	Smoking, Fetal vs adult liver, Serum cotinine, Maternal smoking in pregnancy, Alcohol consumption per day, Age 4 vs age 0	SMPD1, MMP.1
cg02650401	2		GZMA, NCAM1
cg02658330	2		B2M, LTA|LTB
cg02723850	2		CLEC11A
cg02975268	2		GZMA, MMP1
cg03013070	2	Fetal vs adult liver, Gestational age, Primary Sjogrens syndrome, Age 4 vs age 0, Age	IGFBP1, BMP1
cg03250220	2	Sex	HGF, VEGFA
cg03405128	2	Sex	SLITRK5, OMD
cg03484180	2	Clear cell renal carcinoma, Fetal vs adult liver, Age, Sex, Age 4 vs age 0	B2M, NOTCH1
cg03497652	2	Clear cell renal carcinoma, Pancreatic ductal adenocarcinoma, Fetal vs adult liver, Alcohol consumption per day, Gamma-glutamyl transferase	C9, PRSS2
cg03547355	2	Smoking	PIGR, MMP12
cg03594868	2		IGFBP1, FGF.21
cg03604067	2	Rheumatoid arthritis, Pancreatic ductal adenocarcinoma, Fetal vs adult liver, Gestational age	GP1BA, SEMA3E
cg03607951	2	Fetal vs adult liver, Gestational age, Autoantibody production in systemic lupus erythematosus, Primary Sjogrens syndrome, Alcohol consumption per day	AFM, N.CDase
cg03630710	2	Rheumatoid arthritis	B2M, CXCL10
cg03638795	2	Age, Ageing, Age 4 vs age 0	CXCL10, VEGFA
cg03652336	2	Clear cell renal carcinoma	C9, SERPINA3
cg03721362	2	Clear cell renal carcinoma, Pancreatic ductal adenocarcinoma	HGF, VEGFA
cg03736201	2	Gestational age	CRTAM, SKR3
cg03751527	2		CNTN4, FAP
cg03844838	2	Clear cell renal carcinoma	MMP1, CXCL10
cg03895690	2		SERPINA3, LGALS3BP
cg03965198	2		MIA, CD48
cg03984502	2	Fetal vs adult liver, Ageing	LGALS4, B2M
cg04009537	2		CXCL10, CXCL11
cg04018474	2		SELE, B2M
cg04113258	2	Clear cell renal carcinoma	GHR, SERPINA3
cg04221461	2	Clear cell renal carcinoma, Smoking	SLITRK5, SHBG
cg04247152	2	Fetal vs adult liver, Sex, Age 4 vs age 0	GHR, CLEC11A
cg04341097	2	Clear cell renal carcinoma	C9, INSR
cg04424621	2	Pancreatic ductal adenocarcinoma, Ageing, Sex, Primary Sjogrens syndrome, Smoking	C5, CRP
cg04473095	2		NTRK3, IL19
cg04479464	2		CXCL10, CXCL11
cg04573702	2	Sex, Gestational age	LY9, LTA|LTB
cg04664643	2	Gestational age	SEMA3E, SPOCK2
cg04694205	2		THBS2, MMP12
cg04720592	2	Sex, Age 4 vs age 0	LTA|LTB, SLITRK5
cg04736911	2		NCAM1, OMD
cg04744134	2	Rheumatoid arthritis	MMP9, MMP1
cg04904059	2		ACY1, BMP1
cg04959790	2	Gestational age, Age 4 vs age 0, Age	FCER2, CD5L
cg05106191	2	Fetal vs adult liver	SELL, CD163
cg05162256	2		GHR, ACY1
cg05178136	2		CCL17, VEGFA
cg05219445	2	Fetal vs adult liver, Age 4 vs age 0	EZR, NMNAT1
cg05222924	2	Smoking	LTF, THBS2
cg05227621	2	Age 4 vs age 0	C5, FCER2
cg05232694	2	Clear cell renal carcinoma, Primary Sjogrens syndrome, Smoking, C-reactive protein	IGFBP1, WFIKKN2
cg05236731	2		ACY1, B2M
cg05294455	2	Fetal vs adult liver, Gestational age	C5, CRP
cg05374025	2	Fetal vs adult liver	SERPINA3, SELL
cg05380522	2		CLEC11A
cg05557291	2		ACY1, ENPP7
cg05593726	2		NTRK3, SKR3
cg05608511	2		TNFRSF1B, IDUA
cg05678191	2	Rheumatoid arthritis	THBS2, SELE
cg05707833	2		CXCL10, CXCL11
cg05709879	2		HGF, OSM
cg05769505	2	Ageing	GHR, ACY1
cg05861641	2		CXCL10, CXCL11
cg05881068	2		CLEC11A
cg05949877	2		CXCL10, CXCL11
cg05969038	2	Baseline diene conjugation in low-density lipoproteins	MIA, OMD
cg06015525	2	Primary Sjogrens syndrome	TNFRSF1B, CXCL10
cg06028804	2		OSM, TGF.alpha
cg06032302	2	Clear cell renal carcinoma, Age 4 vs age 0	THBS2, MMP12
cg06134546	2		C5, RARRES2
cg06248061	2		C5, CRP
cg06307943	2		IGFBP1, CD163
cg06346335	2		FCER2, CCL17
cg06381803	2	Fetal vs adult liver, Age 4 vs age 0	ACY1, SPOCK2
cg06405206	2		OSM, TGF.alpha
cg06448705	2	Clear cell renal carcinoma, Pancreatic ductal adenocarcinoma, Ageing	THBS2, MMP12
cg06495615	2	Gestational age, Total serum IgE	PAPPA, SPOCK2
cg06503456	2		THBS2, ENPP7
cg06528340	2		EN.RAGE, OSM
cg06553107	2	HIV infection	MPL, CD163
cg06553792	2	Gestational age	SERPIND1, ESM1
cg06620654	2	Rheumatoid arthritis	GHR, INSR
cg06639320	2	Age, Fetal vs adult liver, Ageing, Age 4 vs age 0	CHIT1, STC1
cg06679694	2		FCER2, THBS2
cg06710937	2	Sex	GNLY, LY9
cg06728579	2	Pancreatic ductal adenocarcinoma, HIV infection	C4A|C4B, MMP1
cg06755373	2		CLEC11A
cg06762176	2		HGF, TGF.alpha
cg06797156	2	Gestational age, Sex	IGFBP1, ENPP7
cg06829760	2	Gestational age	ACY1, ENPP7
cg06837426	2		OSM, VEGFA
cg06852293	2		CCL17, ENPP7
cg06947430	2	Sex	CLEC11A
cg06965169	2		ACY1, CD163
cg07015725	2		IDUA, PAPPA
cg07019857	2	Smoking, Age 4 vs age 0	CCL17, MMP1
cg07048094	2		C5, C4A|C4B
cg07137983	2		CLEC11A
cg07207833	2		RARRES2, CRP
cg07213264	2		EN.RAGE, OSM
cg07306755	2	Gestational age	IGFBP1, SKR3
cg07308232	2		LTA|LTB, EN.RAGE
cg07326071	2	Gestational age	NTRK3, MMP12
cg07336751	2	Age 4 vs age 0	TNFRSF1B, FCGR3B
cg07339236	2	Smoking, Pancreatic ductal adenocarcinoma, Maternal smoking during pregnancy, Fetal vs adult liver, Serum cotinine, Maternal smoking in pregnancy, HIV infection, Tobacco smoking	IGFBP4, RARRES2
cg07370221	2	Sex	CLEC11A, TPSB2
cg07375256	2	Alcohol consumption per day	ENPP7, CD163
cg07503211	2		FCER2, LTA|LTB
cg07546943	2	Clear cell renal carcinoma, Pancreatic ductal adenocarcinoma, Fetal vs adult liver, Sex, Primary Sjogrens syndrome, Age 4 vs age 0	IL19, CRP
cg07672814	2	Fetal vs adult liver	TGF.alpha, VEGFA
cg07691146	2	Gestational age, Age 4 vs age 0	FCGR3B, CD163
cg07751039	2		CLEC11A
cg07909178	2		CLEC11A
cg07924892	2		OSM, VEGFA
cg07955995	2	Clear cell renal carcinoma, Age, Ageing	CHIT1, MMP12
cg07996594	2	Clear cell renal carcinoma, Fetal vs adult liver, Maternal smoking in pregnancy	TNFRSF1B, B2M
cg08034440	2	Rheumatoid arthritis	CXCL10, CXCL11
cg08072202	2		EN.RAGE, HGF
cg08072862	2		SMPD1, CXCL10
cg08077071	2	Fetal vs adult liver, Gestational age	CCL17, MMP12
cg08105748	2	Rheumatoid arthritis	TNFRSF1B, B2M
cg08115430	2		EZR, NMNAT1
cg08159148	2		ENPP7, OMD
cg08240881	2		EN.RAGE, OSM
cg08287220	2		OSM, TGF.alpha
cg08376992	2		TNFRSF1B, THBS2
cg08388746	2		BMP1, CLEC11A
cg08472459	2	Rheumatoid arthritis	CLEC11A
cg08622729	2		TNFRSF17, IGFBP1
cg08634357	2	Sex	MMP1, CRTAM
cg08683938	2		CD6, TGF.alpha
cg08685733	2		NTRK3, ADIPOQ
cg08711320	2	Clear cell renal carcinoma, Gestational age	B2M, CRP
cg09077443	2	Clear cell renal carcinoma	CXCL11, CXCL9
cg09123368	2		OSM, VEGFA
cg09161412	2		CCL17, CD163
cg09163035	2	Clear cell renal carcinoma, HIV infection, Gestational age, Age 4 vs age 0	HGF, OSM
cg09397997	2		LGALS4, CD48
cg09410234	2	Pancreatic ductal adenocarcinoma	CXCL11, LGALS3BP
cg09428537	2		IL19, HGFAC
cg09453752	2	Rheumatoid arthritis	CLEC11A, CCL17
cg09501333	2		CCL18, CD5L
cg09518270	2		SELE, OSM
cg09548084	2	Age 4 vs age 0	OSM, VEGFA
cg09567197	2		CLEC11A
cg09737685	2		MMP9, MMP1
cg09751071	2		LTA|LTB, SLITRK5
cg09782300	2		LGALS4, CD48
cg09801621	2		ACY1, CD163
cg09809672	2	Clear cell renal carcinoma, Age, Ageing, Age 4 vs age 0	CHIT1, MMP1
cg09823288	2		CCL18, CRP
cg09935388	2	Clear cell renal carcinoma, Smoking, Maternal smoking during pregnancy, Fetal vs adult liver, Maternal smoking in pregnancy, Body mass index, Serum cotinine, Alcohol consumption per day, Tobacco smoking, Educational attainment	MMP12, MMP1
cg09936218	2		LGALS4, CXCL10
cg09978353	2	Smoking	CLEC11A
cg10090414	2	Clear cell renal carcinoma, Fetal vs adult liver, Age 4 vs age 0	BMP1, SHBG
cg10173172	2	Primary Sjogrens syndrome	B2M, CXCL10
cg10180058	2		CXCL10, CXCL9
cg10296410	2		CXCL10, CXCL9
cg10328290	2	Rheumatoid arthritis	SEMA3E, SPOCK2
cg10396281	2		SERPINA3, CLEC11A
cg10509626	2	Fetal vs adult liver	CD6, CXCL11
cg10580269	2	Gestational age, Sex	GZMA, CRTAM
cg10626063	2		CLEC11A
cg10634598	2		CLEC11A
cg10658666	2	Fetal vs adult liver, Age	B2M, CXCL10
cg10726816	2	Sex	CXCL11, SELE
cg10739556	2	Clear cell renal carcinoma, Pancreatic ductal adenocarcinoma, Sex	ADIPOQ, STC1
cg10768682	2	Rheumatoid arthritis	GHR, INSR
cg10773601	2	Sex, Gestational age	CLEC11A
cg10784273	2	Clear cell renal carcinoma, Gestational age	MMP12, OMD
cg10794086	2	Gestational age, Ageing, Age 4 vs age 0	IGFBP1, SHBG
cg10821127	2	Gestational age	CXCL10, CXCL11
cg10868715	2		CXCL10, CXCL11
cg10927968	2	Waist circumference, Gestational age, Body mass index	CD6, VEGFA
cg11007423	2	Rheumatoid arthritis	NOTCH1, SPOCK2
cg11020853	2	Fetal vs adult liver	MPO, NTRK3
cg11033938	2		LGALS3BP, CD163
cg11065518	2	Rheumatoid arthritis, Sex	C9, STC1
cg11197664	2	Clear cell renal carcinoma, Sex	CCL22, NCAM1
cg11227064	2		HGF, VEGFA
cg11240043	2		FCGR3B, CD163
cg11263852	2		NTRK3, NCAM1
cg11276500	2	Rheumatoid arthritis	RETN, BMP1
cg11282718	2		C5, FGF.21
cg11383802	2		CLEC11A
cg11385631	2		CLEC11A
cg11492723	2	Primary Sjogrens syndrome	FCER2, B2M
cg11501931	2		CLEC11A
cg11578532	2	Gestational age, Age 4 vs age 0	CCL17, MMP1
cg11706729	2	Clear cell renal carcinoma	CLEC11A, OMD
cg11751101	2	Age, Fetal vs adult liver, Gestational age	B2M, STC1
cg11770664	2	Age, Sex	CD209, CCL18
cg11826008	2	Rheumatoid arthritis, Clear cell renal carcinoma, Pancreatic ductal adenocarcinoma	TNFRSF1B, B2M
cg11859384	2		CXCL10, CXCL9
cg12024906	2	Age 4 vs age 0	CCL18, MMP12
cg12054453	2	Clear cell renal carcinoma, Growth differentiation factor 15, HIV infection, Gestational age, Inflammatory bowel disease, C-reactive protein	IL19, G.CSF
cg12068280	2	Gestational age	C5, ADIPOQ
cg12156831	2		CCL21, CXCL10
cg12448298	2		MMP1, EN.RAGE
cg12464869	2	Rheumatoid arthritis	FCER2, CXCL11
cg12492380	2	Pancreatic ductal adenocarcinoma	CXCL10, CXCL11
cg12494515	2	Sex	WFIKKN2, ACY1
cg12536809	2	Gestational age	CLEC11A
cg12547807	2	Clear cell renal carcinoma, Smoking	CD6, FGF.21
cg12550597	2	Clear cell renal carcinoma	OSM, TGF.alpha
cg12559228	2	Gestational age, HIV infection	CNTN4, NCAM1
cg12568707	2		LY9, CXCL10
cg12629689	2		CD209, MMP12
cg12639429	2	Clear cell renal carcinoma, Fetal vs adult liver, Primary Sjogrens syndrome	CXCL11
cg12678451	2	Rheumatoid arthritis	CCL18, ADAMTS13
cg12778183	2		ACY1, MST1
cg12799689	2	Pancreatic ductal adenocarcinoma	FCGR3B, MMP12
cg12800266	2		ADAMTS13, CNTN4
cg12921411	2	Sex	CD209, CNTN4
cg12988843	2		C5, MMP12
cg12992827	2	Rheumatoid arthritis, Body mass index, Growth differentiation factor 15, Gestational age, Inflammatory bowel disease, C-reactive protein, Age 4 vs age 0	MRC2, NCAM1
cg12996119	2		B2M, CXCL10
cg13029400	2	Pancreatic ductal adenocarcinoma, Fetal vs adult liver, Sex	LY9, SLITRK5
cg13031097	2	Clear cell renal carcinoma, Primary Sjogrens syndrome, HIV infection	CXCL10, CXCL11
cg13054523	2	Total serum IgE	ADAMTS13, PAPPA
cg13134535	2		SELE, GP1BA
cg13146020	2		CNTN4, CXCL10
cg13184736	2	Smoking, Fetal vs adult liver, Gestational age, Sex, Maternal smoking in pregnancy, Age 4 vs age 0	BMP1, SEMA3E
cg13319938	2	Age 4 vs age 0	CD48, CHIT1
cg13410764	2	Clear cell renal carcinoma, Pancreatic ductal adenocarcinoma, Ageing	TNFRSF1B, B2M
cg13576994	2	Rheumatoid arthritis	B2M, CXCL10
cg13939431	2		MMP9, MMP1
cg13945667	2		OMD, NTRK3
cg14009561	2		THBS2, ENPP7
cg14091103	2		C9, SERPINA3
cg14178380	2		SERPINA3, CCL11
cg14328457	2	Clear cell renal carcinoma, Pancreatic ductal adenocarcinoma	CLEC11A
cg14364797	2	Clear cell renal carcinoma	CXCL10
cg14440550	2		INSR, SELE
cg14508633	2		IGFBP1, GHR
cg14598846	2	Clear cell renal carcinoma	MMP1, NOTCH1
cg14669514	2	Rheumatoid arthritis	MMP9, LTF
cg14676817	2		EN.RAGE, TGF.alpha
cg14723918	2	Rheumatoid arthritis	TGF.alpha, VEGFA
cg14796107	2		CLEC11A
cg14836555	2	Primary Sjogrens syndrome, Schizophrenia	GDF.8, N.CDase
cg14898177	2		MPO, CXCL10
cg14902168	2		LGALS3BP, CD163
cg14954491	2	Rheumatoid arthritis	CLEC11A
cg14973055	2	Age, Sex, Age 4 vs age 0	PIGR, SEMA3E
cg15014975	2	Clear cell renal carcinoma, Primary Sjogrens syndrome, Maternal smoking in pregnancy	CCL18, B2M
cg15194935	2	Sex	IGFBP1, ICAM5
cg15325961	2		CD209, ADIPOQ
cg15405364	2		THBS2, SELE
cg15474579	2	Smoking, Fetal vs adult liver	C9, SERPINA3
cg15626285	2	Fetal vs adult liver, Age	FCER2, CD5L
cg15732230	2		C5, CRP
cg15760943	2		THBS2, MMP1
cg15775835	2		TNFRSF17, SLITRK5
cg15776929	2	Gestational age	SERPINA3, CD163
cg15803122	2	Rheumatoid arthritis	MIA, C5
cg15815084	2	Sex, Smoking	IGFBP4, SEMA3E
cg15866021	2		SERPINA3, MMP1
cg15880716	2		CXCL10, CXCL11
cg15934248	2		MMP9, CCL17
cg16130238	2	Gestational age, Primary Sjogrens syndrome, HIV infection	C5, NCAM1
cg16140714	2		THBS2, ACY1
cg16155175	2	Gestational age	OSM, TGF.alpha
cg16253537	2		CCL21, IDUA
cg16254746	2		HGF, OSM
cg16557178	2		CLEC11A
cg16578636	2	Body mass index	GHR, LGALS3BP
cg16589299	2	Pancreatic ductal adenocarcinoma	LGALS4, CXCL10
cg16590012	2	HIV infection	CXCL10, CD163
cg16599007	2		TGF.alpha, VEGFA
cg16611654	2	Rheumatoid arthritis	ESM1, NCAM1
cg16651537	2	Sex	CLEC11A
cg16662877	2		TNFRSF1B, CXCL10
cg16770933	2	Rheumatoid arthritis	HGF, VEGFA
cg16931664	2	Age 4 vs age 0	C5, NMNAT1
cg16963852	2	HIV infection	ADAMTS13, NCAM1
cg16996262	2		IGFBP1, MPL
cg17016931	2		CXCL10, CXCL11
cg17061862	2	Fetal vs adult liver, Sex	ESM1, OMD
cg17130457	2	Clear cell renal carcinoma, Pancreatic ductal adenocarcinoma, Ageing, Gestational age, Age 4 vs age 0	MRC2, OMD
cg17131445	2		FCER2, CXCL10
cg17170088	2		CCL21, CXCL10
cg17174814	2		CLEC11A
cg17183174	2	Sex, Gestational age	CD6, FGF.21
cg17193369	2	Rheumatoid arthritis	LTA|LTB, SLITRK5
cg17252489	2		MIA, NCAM1
cg17279365	2		NTRK3, SLITRK5
cg17372101	2	Smoking, Age, Sex, Primary Sjogrens syndrome, Age 4 vs age 0, Tobacco smoking	PIGR, BMP1
cg17459911	2	Primary Sjogrens syndrome	C5, MMP1
cg17470198	2	Gestational age	EZR, NMNAT1
cg17471062	2	Sex, Gestational age	ACY1, SELE
cg17527975	2	Age 4 vs age 0	C5, C9
cg17578330	2		GHR, ACY1
cg17592120	2		CXCL11, TGF.alpha
cg17651821	2		C9, FAP
cg17731065	2		CD5L, SERPINA3
cg17735983	2		EN.RAGE, OSM
cg17742903	2		CCL17, SHBG
cg17754168	2	Rheumatoid arthritis	GZMA, MPL
cg18035301	2		ACY1, ENPP7
cg18039042	2	Fetal vs adult liver	ENPP7, LGALS3BP
cg18062721	2	Fetal vs adult liver, Ageing, Alcohol consumption per day, C-reactive protein, Age 4 vs age 0	TNFRSF1B, B2M
cg18125510	2	Clear cell renal carcinoma, Alcohol consumption per day, C-reactive protein	CXCL10, CXCL9
cg18281439	2		NTRK3, CXCL11
cg18338311	2		EZR, NMNAT1
cg18417954	2	Clear cell renal carcinoma, Sex	CD209, ENPP7
cg18457110	2		CLEC11A
cg18465834	2	Gestational age	CLEC11A
cg18468088	2	Sex, Age	RARRES2, FCER2
cg18496653	2		CXCL10, CXCL11
cg18550847	2	Cow milk allergy, Total serum IgE	TPSB2, PAPPA
cg18722247	2		LY9, CXCL10
cg18757405	2	Fetal vs adult liver, Sex	SELE, SKR3
cg18855195	2		TNFRSF1B, B2M
cg18856614	2	Gestational age	CXCL10, CXCL11
cg18986335	2		PAPPA, LGALS3BP
cg19105674	2	Clear cell renal carcinoma	OSM, VEGFA
cg19131731	2	Clear cell renal carcinoma, Pancreatic ductal adenocarcinoma, Fetal vs adult liver	CXCL10, CXCL9
cg19246761	2	Gestational age	C9, SERPINA3
cg19305293	2	Rheumatoid arthritis	RARRES2, CRP
cg19311602	2		INSR, OMD
cg19401111	2	Sex	ACY1, OMD
cg19575244	2	Rheumatoid arthritis	FGF.21, VEGFA
cg19589396	2	Smoking, Body mass index, Tobacco smoking	CD6, FGF.21
cg19628299	2		CXCL10, CXCL9
cg19637821	2		FCER2, SLITRK5
cg19755435	2	Clear cell renal carcinoma	CLEC11A, SERPINA3
cg19779005	2	HIV infection	FCER2, PAPPA
cg19850406	2		C5, CRP
cg19859270	2	Smoking, Serum cotinine, Tobacco smoking	SERPIND1, ESM1
cg20000562	2		MST1, NCAM1
cg20133890	2	Clear cell renal carcinoma, Gestational age, Age 4 vs age 0	FCER2, CHIT1
cg20146909	2	Fetal vs adult liver, Smoking, Maternal smoking in pregnancy	MIA, ENPP7
cg20156545	2	Gestational age	MIA, ACY1
cg20317437	2	Total serum IgE	PAPPA, MMP1
cg20359524	2		CXCL10, CXCL11
cg20419542	2		OSM, VEGFA
cg20432211	2	Sex	SELE, SLITRK5
cg20472746	2	Clear cell renal carcinoma	SIGLEC1, VEGFA
cg20507228	2	Gestational age	SELL, GP1BA
cg20540942	2	Rheumatoid arthritis	CXCL10, CXCL11
cg20566897	2	Gestational age, Sex, Primary Sjogrens syndrome	CLEC11A
cg20632871	2		CCL17, MMP1
cg20776947	2		CD209, FCER2
cg20860638	2		CD48, MST1
cg20912517	2		MMP9, OMD
cg21042285	2	Serum high-density lipoprotein cholesterol	IGFBP1, SHBG
cg21126707	2	Sex, Fetal vs adult liver	CD209, ACY1
cg21128569	2		HGF, VEGFA
cg21183461	2		ACY1, ENPP7
cg21348975	2		HGF, VEGFA
cg21367783	2		NTRK3, CHIT1
cg21368354	2		NCAM1, NOTCH1
cg21393163	2	Smoking, Fetal vs adult liver, Ageing, Gestational age, Tobacco smoking	MPL, SELL
cg21422770	2		EZR, NMNAT1
cg21429551	2	Sex, HIV infection, Alcohol consumption per day, C-reactive protein, Body mass index, Serum triglycerides	THBS2, VEGFA
cg21434376	2	Smoking	CD209, CXCL10
cg21463262	2		EZR, NMNAT1
cg21510910	2		THBS2, B2M
cg21520549	2		HGF, TGF.alpha
cg21549285	2	Gestational age, Autoantibody production in systemic lupus erythematosus, Primary Sjogrens syndrome	FcRL2, SIGLEC1
cg21553283	2		B2M, MMP12
cg21572722	2	Age, Fetal vs adult liver, Age 4 vs age 0	VCAM1, CHIT1
cg21615127	2	Rheumatoid arthritis	OSM, TGF.alpha
cg21664281	2	Smoking, Pancreatic ductal adenocarcinoma, Fetal vs adult liver, Age 4 vs age 0	CLEC11A
cg21669326	2	Clear cell renal carcinoma	C5, RARRES2
cg21784396	2	Sex, Age 4 vs age 0	ADIPOQ, SHBG
cg21824343	2	Gestational age	TPSB2, PAPPA
cg21909751	2	Fetal vs adult liver, Age 4 vs age 0	CXCL10, CXCL11
cg21913886	2	Clear cell renal carcinoma, Smoking	LY9, SLITRK5
cg22011731	2		CLEC11A, SELL
cg22051865	2		EN.RAGE, VEGFA
cg22055337	2	Clear cell renal carcinoma	SELL, OSM
cg22140261	2		NTRK3, LY9
cg22244039	2	Sex	GNLY, ACY1
cg22304262	2	Ageing, Alcohol consumption per day, C-reactive protein, Age 4 vs age 0, Serum triglycerides, Gamma-glutamyl transferase	SELL, STC1
cg22317104	2		CLEC11A
cg22348001	2	Clear cell renal carcinoma	TNFRSF17, SERPIND1
cg22513955	2	Fetal vs adult liver	EN.RAGE, OSM
cg22521263	2		NTRK3, ACY1
cg22536775	2		CLEC11A
cg22603960	2		C5, CRP
cg22682031	2		IL19, ENPP7
cg22693030	2		CRP, MMP1
cg22713976	2	Rheumatoid arthritis	CXCL10, CXCL11
cg22845236	2		CLEC11A
cg22877129	2		MMP1, MMP.1
cg22933582	2	Clear cell renal carcinoma, Gestational age	C5, LGALS3BP
cg22933879	2		CXCL10, CXCL11
cg22953960	2	Pancreatic ductal adenocarcinoma, Sex	CD209, CNTN4
cg22988146	2		SLITRK5, CXCL11
cg23031135	2	Gestational age	CLEC11A
cg23041295	2		CD209, LY9
cg23205183	2		EN.RAGE, OSM
cg23256579	2	Sex	LTA|LTB, NCAM1
cg23339899	2		CCL17, MMP1
cg23510258	2	Clear cell renal carcinoma, Gestational age	MIA, SLITRK5
cg23576855	2	Smoking, Serum cotinine, Tobacco smoking	SERPIND1, SEMA3E
cg23795234	2		GP1BA, LGALS3BP
cg23820746	2		GZMA, MMP12
cg23874611	2		CNTN4, OSM
cg24003560	2	Clear cell renal carcinoma	SERPIND1, CCL22
cg24021129	2		CCL17, MMP1
cg24089263	2		HGF, VEGFA
cg24134897	2	Gestational age, Sex, Smoking, Tobacco smoking, Age	ACY1, CCL17
cg24135615	2	Ageing, Age 4 vs age 0	RARRES2, B2M
cg24151204	2		CXCL10, CXCL11
cg24254206	2		CXCL11, OSM
cg24401044	2		CLEC11A
cg24425483	2		FCGR3B, THBS2
cg24582510	2		TNFRSF17, CD5L
cg24592370	2		CXCL10, CXCL11
cg24707889	2	Gestational age, C-reactive protein	SIGLEC1, SKR3
cg24790297	2	Sex	CLEC11A
cg24843346	2	Fetal vs adult liver, Age 4 vs age 0, Cleft palate vs cleft lip	RETN, FCER2
cg24924577	2	Fetal vs adult liver, Gestational age, Smoking	SMPD1, FGF.21
cg24998981	2	Gestational age	FAP, G.CSF
cg25087851	2	Total serum IgE	PAPPA, CD163
cg25094735	2		IGFBP1, GHR
cg25120405	2		SELL, SKR3
cg25125898	2	Rheumatoid arthritis	GHR, ACY1
cg25129765	2		GHR, ACY1
cg25208740	2	Rheumatoid arthritis	HGF, VEGFA
cg25227364	2		CCL21, B2M
cg25309343	2	Sex	CLEC11A, CD5L
cg25359292	2		EN.RAGE, OSM
cg25406989	2		RETN, FCER2
cg25419914	2	Rheumatoid arthritis	SEMA3E, SPOCK2
cg25645310	2	Rheumatoid arthritis, Gestational age	CD163, HGF
cg25648203	2	Smoking, Serum cotinine, Tobacco smoking, Educational attainment	PIGR, CCL22
cg25665606	2		NCAM1, LGALS3BP
cg25741837	2		IL19, ACY1
cg25751787	2	Gestational age	CXCL10, CXCL11
cg25809434	2		EN.RAGE, OSM
cg25879946	2		ACY1, SELE
cg25902229	2		CLEC11A
cg25943702	2		CXCL10, CXCL11
cg25972092	2		B2M, CXCL10
cg25998745	2	Age, Sex, Primary Sjogrens syndrome, Smoking, Alcohol consumption per day, Age 4 vs age 0	TNFRSF17, PRSS2
cg26011692	2		OMD, CXCL9
cg26072213	2	Rheumatoid arthritis	CCL25, OMD
cg26099045	2	Fetal vs adult liver, Sex, Gestational age	EZR, NMNAT1
cg26126740	2		LGALS4, CCL18
cg26213873	2	Sex	IL19, ADIPOQ
cg26230601	2		EN.RAGE, OSM
cg26275825	2		MMP9, CCL18
cg26277754	2	Clear cell renal carcinoma, Pancreatic ductal adenocarcinoma	THBS2, SELE
cg26326621	2		OSM, TGF.alpha
cg26341661	2		C5, CRP
cg26354221	2	Ageing, Body mass index, Waist circumference, Gestational age	TNFRSF17, CD163
cg26361436	2	Pancreatic ductal adenocarcinoma, Fetal vs adult liver	CRP, LGALS3BP
cg26385126	2	Gestational age	IGFBP1, VEGFA
cg26470501	2	Clear cell renal carcinoma, Fetal vs adult liver, Primary Sjogrens syndrome, Gestational age, C-reactive protein, Inflammatory bowel disease, Body mass index	CRP, CD163
cg26507353	2	Fetal vs adult liver	CLEC11A
cg26516004	2	Fetal vs adult liver, Sex, Maternal smoking in pregnancy	NTRK3, CCL17
cg26655772	2		CD209, MMP12
cg26720235	2		SERPINA3, GP1BA
cg26825341	2		IGFBP4, RARRES2
cg26832832	2		TPSB2, GP1BA
cg26886850	2		THBS2, B2M
cg26950953	2	Clear cell renal carcinoma, Gestational age	ACY1, GP1BA
cg26953469	2		TGF.alpha, VEGFA
cg27098804	2		CLEC11A
cg27113548	2	Clear cell renal carcinoma, Smoking, Gestational age	NTRK3, C5
cg27123522	2		NTRK3, SMPD1
cg27152128	2		CCL17, SHBG
cg27274446	2	Clear cell renal carcinoma	ENPP7, CD163
cg27360300	2		CXCL10, CXCL9
cg27386529	2	Fetal vs adult liver, Alcohol consumption per day, Age 4 vs age 0	CRP, NCAM1
cg27396284	2		LY9, B2M
cg27469606	2	C-reactive protein	C9, G.CSF
cg27576679	2		B2M, CXCL10
ch.1.171672612F	2	Clear cell renal carcinoma, Fetal vs adult liver, Tobacco smoking	HGF, VEGFA
ch.14.1488981R	2	Fetal vs adult liver, Primary Sjogrens syndrome, Gestational age	OSM, TGF.alpha
ch.5.1906008F	2	Rheumatoid arthritis	EN.RAGE, OSM
cg00010742	1		CXCL10
cg00012386	1	Rheumatoid arthritis	TNFRSF1B
cg00014104	1	Sex	GZMA
cg00014830	1		MMP1
cg00015373	1		MMP1
cg00021945	1		CD209
cg00022024	1		NTRK3
cg00030816	1		MMP12
cg00033551	1	Fetal vs adult liver	SLITRK5
cg00034003	1		OMD
cg00035969	1	Clear cell renal carcinoma	SKR3
cg00041047	1	Chronic kidney disease	CCL17
cg00042837	1	Rheumatoid arthritis, Fetal vs adult liver, Gestational age	MMP9
cg00043800	1	Fetal vs adult liver, Age 4 vs age 0	SHBG
cg00046156	1		ENPP7
cg00046913	1		NTRK3
cg00048759	1	Age	MMP12
cg00049892	1	Fetal vs adult liver, Ageing	ACY1
cg00050984	1		CRTAM
cg00052853	1		ENPP7
cg00054706	1	Rheumatoid arthritis	CCL18
cg00054774	1	Sex, Maternal smoking in pregnancy, Age 4 vs age 0	C5
cg00059053	1	Rheumatoid arthritis	CLEC11A
cg00059225	1	Fetal vs adult liver, Age, Sex, Age 4 vs age 0	VCAM1
cg00059424	1	Rheumatoid arthritis	SLITRK5
cg00063174	1	Clear cell renal carcinoma	ADAMTS13
cg00063979	1	Rheumatoid arthritis	CXCL10
cg00072426	1		PAPPA
cg00085790	1	Fetal vs adult liver, HIV infection	ACY1
cg00090282	1		IDUA
cg00092287	1		CXCL10
cg00092711	1		CRP
cg00093890	1	Rheumatoid arthritis	SKR3
cg00093971	1		IL19
cg00094412	1	Body mass index	NTRK3
cg00095594	1	Age, HIV infection	CD6
cg00099295	1		GNLY
cg00103778	1	Age	MMP9
cg00108715	1	Sex, Body mass index, Serum high-density lipoprotein cholesterol	GHR
cg00110654	1	Rheumatoid arthritis	MST1
cg00111102	1	Gestational age, Sex	LY9
cg00113554	1	Rheumatoid arthritis	GHR
cg00114966	1		CXCL10
cg00115984	1	Rheumatoid arthritis	CXCL10
cg00116658	1		IGFBP1
cg00118199	1		MMP1
cg00119073	1		SERPINA3
cg00120096	1		CHIT1
cg00120157	1		ENPP7
cg00122679	1	Clear cell renal carcinoma	CXCL10
cg00124375	1	Clear cell renal carcinoma, Pancreatic ductal adenocarcinoma	SELE
cg00137918	1		SELL
cg00142735	1		ENPP7
cg00145732	1		NTRK3
cg00146096	1		CRTAM
cg00149061	1	Clear cell renal carcinoma	SMPD1
cg00151370	1	Fetal vs adult liver	MMP12
cg00152126	1		VEGFA
cg00152577	1		CCL17
cg00156497	1		CRP
cg00157456	1	Rheumatoid arthritis	CD5L
cg00159289	1	Clear cell renal carcinoma	SERPINA3
cg00165994	1		CCL25
cg00169354	1		N.CDase
cg00169419	1		MMP12
cg00171126	1		CD163
cg00173804	1		CD5L
cg00176638	1	Maternal smoking in pregnancy	C5
cg00178427	1		CLEC11A
cg00181054	1		CCL17
cg00181061	1		B2M
cg00181849	1	Age 4 vs age 0	FCER2
cg00184732	1	Gestational age	N.CDase
cg00187059	1		LTF
cg00188321	1	Rheumatoid arthritis, Clear cell renal carcinoma	SMPD1
cg00189276	1	Clear cell renal carcinoma	LY9
cg00196474	1	Gestational age	CD163
cg00197373	1		FCER2
cg00202460	1	Gestational age, Sex	ENPP7
cg00206542	1	Fetal vs adult liver	MST1
cg00207534	1		CXCL11
cg00209398	1		LGALS3BP
cg00209612	1		SEMA3E
cg00214970	1	Clear cell renal carcinoma, Fetal vs adult liver, Age 4 vs age 0	LGALS4
cg00215066	1		CCL17
cg00215744	1		MMP1
cg00216138	1	Fetal vs adult liver, Gestational age	FCER2
cg00218409	1	Clear cell renal carcinoma, Sex, Gestational age, Age 4 vs age 0	GZMA
cg00221745	1	Age	FcRL2
cg00222799	1	Age 4 vs age 0	ACY1
cg00224299	1	HIV infection	AFM
cg00224465	1	HIV infection	NMNAT1
cg00225132	1		THBS2
cg00227665	1	Ageing, Age 4 vs age 0	SELL
cg00231754	1		C5
cg00232453	1	Gestational age	TPSB2
cg00233887	1		SELE
cg00238213	1		NEP
cg00238353	1	Sex, Body mass index	NCAM1
cg00238468	1		ACY1
cg00242031	1	Clear cell renal carcinoma	ACY1
cg00245075	1	Gestational age	CD163
cg00246301	1		CXCL11
cg00248310	1	Rheumatoid arthritis	CLEC11A
cg00248638	1		CD209
cg00248713	1		CHIT1
cg00250409	1		LGALS3BP
cg00251270	1	Rheumatoid arthritis	NTRK3
cg00251618	1	Age 4 vs age 0	OMD
cg00254017	1		SPOCK2
cg00255919	1		B2M
cg00257786	1		WFIKKN2
cg00259966	1		CD209
cg00265490	1	Rheumatoid arthritis	SLITRK5
cg00266322	1		CCL11
cg00270654	1		SPOCK2
cg00274203	1	Clear cell renal carcinoma, Fetal vs adult liver	CLEC11A
cg00276792	1		MIA
cg00280220	1		B2M
cg00280758	1	Rheumatoid arthritis	CXCL11
cg00281048	1		MMP.1
cg00287773	1	Clear cell renal carcinoma, Fetal vs adult liver, Gestational age	GNLY
cg00288844	1	Fetal vs adult liver, Age 4 vs age 0	MPO
cg00291003	1	Rheumatoid arthritis	C9
cg00291292	1		ENPP7
cg00292568	1		CXCL10
cg00303982	1	Clear cell renal carcinoma, Pancreatic ductal adenocarcinoma	CHIT1
cg00306063	1		CCL17
cg00306909	1		SPOCK2
cg00309339	1		LY9
cg00309945	1	Fetal vs adult liver, C-reactive protein	ACY1
cg00314343	1		F7
cg00317577	1		PAPPA
cg00319686	1	Fetal vs adult liver	ACY1
cg00321709	1		CCL21
cg00324161	1		OSM
cg00325917	1		IL19
cg00326902	1		MMP1
cg00328720	1	Rheumatoid arthritis, Clear cell renal carcinoma, Pancreatic ductal adenocarcinoma	TNFRSF1B
cg00328870	1	Age	GNLY
cg00329270	1		CCL11
cg00332680	1		SERPIND1
cg00336867	1		CXCL10
cg00346300	1		FAP
cg00365481	1	Clear cell renal carcinoma	LY9
cg00369056	1		SERPINA3
cg00371770	1		ACY1
cg00372132	1		NTRK3
cg00372692	1	HIV infection	LGALS4
cg00375829	1		TPSB2
cg00376639	1	Rheumatoid arthritis	B2M
cg00378313	1	Rheumatoid arthritis	B2M
cg00380692	1		ENPP7
cg00380835	1	Sex	BMP1
cg00380904	1		MMP12
cg00387457	1		MST1
cg00387658	1	Sex, Fetal vs adult liver, Age, Gestational age	B2M
cg00390694	1		PAPPA
cg00393546	1		NTRK3
cg00398420	1	Sex, Age 4 vs age 0	CXCL10
cg00401032	1		CXCL10
cg00408278	1		THBS2
cg00410926	1	Gestational age	CCL17
cg00411413	1	Fetal vs adult liver, Age 4 vs age 0	PAPPA
cg00415057	1	Gestational age	CCL21
cg00418663	1		MMP12
cg00418913	1		SLITRK5
cg00419186	1		CHIT1
cg00422488	1	Pancreatic ductal adenocarcinoma, Sex	NCAM1
cg00424152	1		CD5L
cg00425885	1		SERPINA3
cg00426089	1		TNFRSF1B
cg00427260	1		FcRL2
cg00430888	1	Sex	LTA|LTB
cg00433296	1	Sex, Maternal smoking in pregnancy	IDUA
cg00439658	1	Age, Ageing	VCAM1
cg00442907	1		ACY1
cg00443971	1		MST1
cg00447817	1	Fetal vs adult liver, Gestational age, Age 4 vs age 0	B2M
cg00450425	1	Rheumatoid arthritis	LGALS3BP
cg00452199	1	Age 4 vs age 0	LTF
cg00460818	1		IGFBP4
cg00463171	1	HIV infection	CXCL10
cg00463840	1		SERPINA3
cg00464056	1		ACY1
cg00465319	1		MST1
cg00466136	1		MST1
cg00466364	1	Rheumatoid arthritis	CCL21
cg00469797	1		SERPINA3
cg00472758	1	Gestational age	ADIPOQ
cg00473245	1		ICAM5
cg00474031	1		MMP9
cg00474696	1		ICAM5
cg00475322	1	Fetal vs adult liver	FCER2
cg00486708	1		C5
cg00487737	1	Fetal vs adult liver	CCL17
cg00491616	1		NCAM1
cg00492055	1	Clear cell renal carcinoma, Fetal vs adult liver	SMPD1
cg00493609	1		FCER2
cg00496026	1	Fetal vs adult liver	PRSS2
cg00499726	1	HIV infection	GNLY
cg00500048	1		IGFBP1
cg00501622	1	Fetal vs adult liver, Gestational age, Age 4 vs age 0	CD209
cg00501711	1		NTRK3
cg00503090	1	Rheumatoid arthritis	THBS2
cg00504690	1		MST1
cg00505502	1		IL19
cg00506629	1		TPSB2
cg00507008	1	Pancreatic ductal adenocarcinoma, Fetal vs adult liver	F7
cg00508575	1	Maternal smoking in pregnancy	PRSS2
cg00510541	1	Clear cell renal carcinoma	CCL17
cg00512563	1		B2M
cg00513208	1	Sex	BMP1
cg00515593	1	Rheumatoid arthritis	CCL17
cg00517612	1		ICAM5
cg00517855	1		GDF.8
cg00519039	1		FCGR3B
cg00520135	1	Fetal vs adult liver	CD163
cg00521588	1		ICAM5
cg00522018	1	Pancreatic ductal adenocarcinoma	OMD
cg00522403	1		B2M
cg00530320	1		MST1
cg00530438	1		ACY1
cg00532122	1		NTRK3
cg00534468	1	Ageing	CXCL10
cg00535027	1		LGALS3BP
cg00537351	1		GZMA
cg00543073	1	Sex	GNLY
cg00543658	1		BMP1
cg00547018	1		C5
cg00547777	1	Rheumatoid arthritis	LTA|LTB
cg00549798	1	Gestational age, Age 4 vs age 0	CXCL10
cg00555393	1		CD209
cg00555666	1		CCL25
cg00559919	1		MST1
cg00560671	1		C5
cg00563238	1	Rheumatoid arthritis	SLITRK5
cg00563932	1	Gestational age, Age 4 vs age 0	TNFRSF1B
cg00564524	1		GZMA
cg00574017	1		EN.RAGE
cg00579292	1		SKR3
cg00583304	1		CCL17
cg00583328	1		CXCL11
cg00587115	1		CNTN4
cg00587890	1		MIA
cg00589305	1	Fetal vs adult liver	CXCL11
cg00590817	1	Pancreatic ductal adenocarcinoma	THBS2
cg00593048	1	Rheumatoid arthritis	STC1
cg00596207	1		NTRK3
cg00596643	1		FGF.21
cg00606662	1		CCL17
cg00612225	1		OMD
cg00618711	1		CXCL10
cg00620628	1		CCL17
cg00621750	1		ACY1
cg00624564	1		MMP1
cg00624834	1	Rheumatoid arthritis	FCER2
cg00625963	1	Ageing, Primary Sjogrens syndrome	SIGLEC1
cg00628375	1		SKR3
cg00628766	1		CXCL10
cg00631221	1	Clear cell renal carcinoma, HIV infection	CRTAM
cg00631759	1		RARRES2
cg00638202	1		ADAMTS13
cg00641679	1		CLEC11A
cg00644351	1	Ageing	CD163
cg00652772	1	Fetal vs adult liver	CD209
cg00655525	1		SMPD1
cg00656387	1		THBS2
cg00663946	1	Fetal vs adult liver, Age 4 vs age 0	TNFRSF1B
cg00669964	1	HIV infection	CCL17
cg00670942	1		CXCL9
cg00671386	1	Age 4 vs age 0	FcRL2
cg00673557	1		MMP12
cg00678361	1		NTRK3
cg00681003	1		NTRK3
cg00684790	1	Age 4 vs age 0	GP1BA
cg00685614	1	Pancreatic ductal adenocarcinoma, Gestational age, Age 4 vs age 0	NTRK3
cg00685622	1		B2M
cg00688840	1	Rheumatoid arthritis, Clear cell renal carcinoma, Fetal vs adult liver, Gestational age	NTRK3
cg00695416	1		GZMA
cg00696803	1		MST1
cg00699419	1		CXCL10
cg00705668	1		FCER2
cg00705730	1	Fetal vs adult liver, Gestational age	EN.RAGE
cg00706191	1	Gestational age	CCL11
cg00712289	1		RARRES2
cg00713113	1	Rheumatoid arthritis	GP1BA
cg00717279	1		CXCL10
cg00720137	1		ACY1
cg00720829	1	Sex	MMP9
cg00723277	1		LTF
cg00729133	1		FCER2
cg00729269	1		NTRK3
cg00739217	1	Sex, Age 4 vs age 0	CRP
cg00741600	1		FCGR3B
cg00748589	1	Fetal vs adult liver, Age, Ageing	MMP12
cg00748978	1		THBS2
cg00750088	1		ICAM5
cg00751253	1		ESM1
cg00751937	1		VEGFA
cg00753287	1	Age 4 vs age 0	BMP1
cg00753885	1	Age	B2M
cg00758881	1		NTRK3
cg00760338	1		CCL21
cg00765312	1	Clear cell renal carcinoma	ACY1
cg00771084	1		G.CSF
cg00771642	1	Age 4 vs age 0	OMD
cg00777560	1	Gestational age	ICAM5
cg00779393	1		THBS2
cg00782811	1	Clear cell renal carcinoma, Pancreatic ductal adenocarcinoma, Fetal vs adult liver, Gestational age	CRP
cg00783409	1	Gestational age	NEP
cg00784161	1	Gestational age	AFM
cg00784759	1		CXCL11
cg00790535	1		CD6
cg00796187	1		ENPP7
cg00809820	1	Fetal vs adult liver	C5
cg00813440	1		ACY1
cg00813509	1		CCL21
cg00814580	1		CCL22
cg00815399	1	Sex	LGALS4
cg00817189	1	Fetal vs adult liver, Sex	ACY1
cg00818822	1		IL19
cg00819141	1		MMP9
cg00826902	1		G.CSF
cg00827989	1		ACY1
cg00828709	1	Clear cell renal carcinoma	MST1
cg00832555	1		F7
cg00833822	1		G.CSF
cg00834755	1		SERPINA3
cg00834923	1	Fetal vs adult liver, Sex, Primary Sjogrens syndrome, Gestational age	MMP9
cg00837434	1		CXCL9
cg00847277	1		CD6
cg00848509	1		B2M
cg00849044	1		B2M
cg00849990	1	Gestational age	CXCL11
cg00854006	1		OMD
cg00857862	1		MST1
cg00857998	1		ACY1
cg00860425	1	Clear cell renal carcinoma	IGFBP1
cg00861277	1		CXCL9
cg00861380	1		CD209
cg00862597	1	Sex	SELE
cg00863306	1	Clear cell renal carcinoma, Fetal vs adult liver, Age 4 vs age 0	TNFRSF1B
cg00863378	1	Gestational age, Body mass index, Age 4 vs age 0	GHR
cg00865724	1	Fetal vs adult liver	FGF.21
cg00866667	1	Rheumatoid arthritis	SERPINA3
cg00867472	1	Smoking, Gestational age	RETN
cg00868383	1		INSR
cg00882611	1		MMP9
cg00883218	1		CXCL10
cg00884173	1		C9
cg00886695	1		ESM1
cg00898480	1		FCER2
cg00908631	1	Clear cell renal carcinoma, Gestational age, Sex	GZMA
cg00910907	1		S100A9
cg00912164	1	Ageing	SERPINA3
cg00920572	1		NTRK3
cg00920892	1	Gestational age	MPO
cg00924017	1		CCL17
cg00926657	1		BMP1
cg00929493	1		CHIT1
cg00930213	1		ICAM5
cg00932510	1	Age 4 vs age 0	C5
cg00933788	1	Rheumatoid arthritis	CD5L
cg00935421	1	Gestational age	AFM
cg00948520	1	Pancreatic ductal adenocarcinoma, Gestational age	C5
cg00949386	1		FCGR3B
cg00949511	1	Rheumatoid arthritis	ACY1
cg00953399	1	Primary Sjogrens syndrome	CD209
cg00955039	1		LGALS3BP
cg00956679	1	Clear cell renal carcinoma, Fetal vs adult liver	C5
cg00959298	1	Rheumatoid arthritis	B2M
cg00960509	1	Child abuse, HIV infection	LY9
cg00965168	1	Sex	OMD
cg00968241	1		ICAM5
cg00969035	1		MMP1
cg00969446	1		SERPINA3
cg00970325	1		HGF
cg00971369	1	Fetal vs adult liver	LTF
cg00972522	1		MST1
cg00973876	1	Fetal vs adult liver, Gestational age	SELL
cg00977403	1	Sex	MST1
cg00978427	1	HIV infection	NTRK3
cg00978855	1	Gestational age	CCL17
cg00980319	1		GZMA
cg00981070	1	Age 4 vs age 0	OMD
cg00987630	1		MMP12
cg00988037	1	Clear cell renal carcinoma, Fetal vs adult liver	MPL
cg00988050	1	Fetal vs adult liver	ADAMTS13
cg00989249	1	Sex, Gestational age, Cleft palate vs cleft lip	MMP1
cg00995180	1		LY9
cg00995368	1		C5
cg00995893	1	Rheumatoid arthritis	CCL17
cg01005080	1	Sex	SELL
cg01005968	1	Rheumatoid arthritis, Gestational age	SELE
cg01006077	1		IDUA
cg01008495	1	Rheumatoid arthritis	NCAM1
cg01012082	1		GP1BA
cg01019028	1		CCL18
cg01021658	1		MST1
cg01022501	1		LGALS3BP
cg01024792	1		PRSS2
cg01027498	1		CXCL10
cg01028142	1	Gestational age, Autoantibody production in systemic lupus erythematosus, Primary Sjogrens syndrome	CXCL11
cg01040499	1	HIV infection	FGF.21
cg01042637	1	Rheumatoid arthritis	CHIT1
cg01053411	1	Rheumatoid arthritis	CXCL9
cg01053766	1	Clear cell renal carcinoma	C9
cg01055691	1		CCL17
cg01059398	1	Clear cell renal carcinoma, Inflammatory bowel disease, C-reactive protein	G.CSF
cg01062980	1		ACY1
cg01075918	1	Gestational age	ACY1
cg01078048	1	Gestational age	CXCL10
cg01078197	1		NTRK3
cg01082111	1		IDUA
cg01084270	1		LGALS3BP
cg01085362	1		LY9
cg01088561	1		ENPP7
cg01095004	1		ENPP7
cg01097180	1	Sex	ACY1
cg01099150	1		MST1
cg01101782	1	Fetal vs adult liver	TPSB2
cg01102270	1		ACY1
cg01102307	1		SIGLEC1
cg01105943	1		CXCL10
cg01108642	1		CD163
cg01109535	1		SELL
cg01113412	1		CXCL10
cg01119072	1		SELL
cg01119145	1		ACY1
cg01121712	1		LY9
cg01122889	1		B2M
cg01128736	1		MMP1
cg01132515	1		CRTAM
cg01133662	1		GP1BA
cg01134185	1	HIV infection	FGF.21
cg01134643	1	Clear cell renal carcinoma	NTRK3
cg01136750	1		IGFBP1
cg01142001	1		SMPD1
cg01148088	1		VEGFA
cg01149053	1	Gestational age	SELL
cg01149683	1		SMPD1
cg01150799	1	Sex, Smoking, Age 4 vs age 0	MRC2
cg01156550	1	Sex	SLITRK5
cg01159601	1		CD5L
cg01160311	1		CNTN4
cg01161376	1		SHBG
cg01163842	1		OSM
cg01164118	1		THBS2
cg01175020	1		CCL21
cg01176329	1	Gestational age, Age 4 vs age 0	MRC2
cg01176433	1	Fetal vs adult liver, Sex, Gestational age, Age 4 vs age 0	S100A9
cg01176947	1		FCER2
cg01179055	1	Gestational age	B2M
cg01181150	1	Clear cell renal carcinoma	LGALS3BP
cg01181681	1	Fetal vs adult liver, Gestational age	RARRES2
cg01186551	1		ENPP7
cg01187883	1		MMP1
cg01187920	1		CRTAM
cg01188584	1		MMP1
cg01189092	1		ESM1
cg01191286	1	Rheumatoid arthritis	IL19
cg01192112	1		SLITRK5
cg01192875	1	Clear cell renal carcinoma, HIV infection	TPSB2
cg01195628	1		FGF.21
cg01198655	1	Rheumatoid arthritis	CCL18
cg01201932	1		ACY1
cg01205267	1	Age	NTRK3
cg01206728	1		RARRES2
cg01215936	1		ACY1
cg01215957	1	Sex	ACY1
cg01216589	1	Primary Sjogrens syndrome	ACY1
cg01225086	1		GP1BA
cg01229798	1		B2M
cg01234251	1		SERPINA3
cg01234610	1	Gestational age	CXCL9
cg01235305	1		CXCL11
cg01238672	1		C5
cg01239268	1		SHBG
cg01242677	1		NTRK3
cg01244034	1		LGALS4
cg01244128	1		CD6
cg01244571	1		CXCL11
cg01244871	1		RARRES2
cg01247836	1	Fetal vs adult liver, Sex	CCL21
cg01250961	1		CXCL11
cg01252136	1	Clear cell renal carcinoma	ACY1
cg01252224	1		SLITRK5
cg01256260	1		N.CDase
cg01257345	1		CCL25
cg01261503	1	Clear cell renal carcinoma	CD5L
cg01262948	1		FGF.21
cg01267315	1		PRSS2
cg01272202	1	Smoking, Maternal smoking in pregnancy	VEGFA
cg01272707	1		MST1
cg01282418	1		RARRES2
cg01285435	1		SERPIND1
cg01289544	1		GHR
cg01291508	1		MMP12
cg01295188	1		CCL17
cg01301319	1	Gestational age	NEP
cg01304182	1		CCL22
cg01305328	1	HIV infection	SERPINA3
cg01308151	1		NTRK3
cg01311181	1		THBS2
cg01312762	1	Smoking	ACY1
cg01320298	1	Fetal vs adult liver	NTRK3
cg01324343	1		SKR3
cg01329005	1	Clear cell renal carcinoma, Gestational age, Primary Sjogrens syndrome, Age 4 vs age 0	SIGLEC1
cg01329394	1		ICAM5
cg01329690	1	Clear cell renal carcinoma, Gestational age	GP1BA
cg01330741	1		IDUA
cg01333287	1		ICAM5
cg01335785	1		IDUA
cg01340089	1	HIV infection	CD5L
cg01340312	1	Ageing, Primary Sjogrens syndrome	GZMA
cg01345136	1	Sex	SLITRK5
cg01347957	1	Age 4 vs age 0	WFIKKN2
cg01348922	1	Fetal vs adult liver, Gestational age	ENPP7
cg01352468	1	Rheumatoid arthritis	SERPIND1
cg01353073	1		CXCL10
cg01358993	1		N.CDase
cg01364498	1		CD5L
cg01369228	1		NEP
cg01374918	1		MMP1
cg01378090	1	HIV infection	FCER2
cg01378578	1	Rheumatoid arthritis	C5
cg01388979	1		ACY1
cg01392338	1		TNFRSF1B
cg01393705	1		GZMA
cg01396774	1	Sex	IGFBP1
cg01399264	1	Rheumatoid arthritis	CCL17
cg01400924	1		PAPPA
cg01408881	1		GHR
cg01410316	1		HGFAC
cg01411366	1	Fetal vs adult liver, Sex	SELL
cg01411921	1	Gestational age	GP1BA
cg01412419	1	Clear cell renal carcinoma	SHBG
cg01413698	1		CCL17
cg01414289	1	Rheumatoid arthritis	NCAM1
cg01416295	1	Maternal smoking in pregnancy	CD5L
cg01418124	1		CHIT1
cg01426169	1		FGF.21
cg01427471	1		G.CSF
cg01427567	1		G.CSF
cg01435464	1		ENPP7
cg01438056	1	Fetal vs adult liver, Gestational age	CCL22
cg01440105	1	Rheumatoid arthritis	NTRK3
cg01443488	1		FCER2
cg01444397	1	Age	C9
cg01444501	1		LTA|LTB
cg01444797	1		GHR
cg01457752	1		ICAM5
cg01459453	1	Primary Sjogrens syndrome	IGFBP4
cg01459854	1		CNTN4
cg01460805	1	Rheumatoid arthritis	TPSB2
cg01462453	1	Rheumatoid arthritis	ENPP7
cg01465177	1	Fetal vs adult liver, Age 4 vs age 0	ACY1
cg01466678	1	Pancreatic ductal adenocarcinoma	CRP
cg01469027	1		VCAM1
cg01473643	1	HIV infection	B2M
cg01484915	1	Clear cell renal carcinoma	FCER2
cg01490663	1		CRTAM
cg01502244	1		CHIT1
cg01503348	1		GP1BA
cg01504447	1	Fetal vs adult liver, Primary Sjogrens syndrome	C9
cg01507044	1		CXCL11
cg01510051	1		NCAM1
cg01511480	1	Fetal vs adult liver	VEGFA
cg01514538	1	Clear cell renal carcinoma, Gestational age	CXCL11
cg01517148	1		MMP12
cg01517384	1	Clear cell renal carcinoma	CXCL10
cg01526748	1	Gestational age	MMP1
cg01528052	1	Clear cell renal carcinoma	MST1
cg01538998	1		FCER2
cg01539064	1		MMP9
cg01540522	1		G.CSF
cg01541629	1		VEGFA
cg01542423	1		FCGR3B
cg01548300	1	HIV infection	CD163
cg01550915	1	HIV infection	LGALS3BP
cg01554970	1		GDF.8
cg01556246	1	Smoking, Gestational age	OSM
cg01556502	1		ACY1
cg01557754	1		ADAMTS13
cg01558401	1		NCAM1
cg01560900	1		CXCL10
cg01563502	1		TNFRSF17
cg01564705	1		MMP12
cg01564925	1		CCL11
cg01566552	1		NCAM1
cg01569083	1	Ageing	GDF.8
cg01571916	1		IGFBP4
cg01572696	1	Fetal vs adult liver, Age 4 vs age 0	IDUA
cg01575519	1		THBS2
cg01576275	1	Rheumatoid arthritis, Clear cell renal carcinoma, Fetal vs adult liver	GZMA
cg01579024	1	Ageing	FCGR3B
cg01579206	1		ENPP7
cg01579216	1		CXCL10
cg01579299	1	Pancreatic ductal adenocarcinoma	NTRK3
cg01581781	1		MMP12
cg01588250	1		EZR
cg01588592	1	Fetal vs adult liver, C-reactive protein	IGFBP4
cg01588826	1		RARRES2
cg01591830	1	Fetal vs adult liver, Age	C5
cg01594260	1		B2M
cg01597398	1		IGFBP1
cg01598009	1	Primary Sjogrens syndrome	ADAMTS13
cg01598675	1		B2M
cg01601470	1		ACY1
cg01601712	1	Fetal vs adult liver	CD209
cg01602621	1	Fetal vs adult liver	LTF
cg01602730	1	Fetal vs adult liver, Sex	LTA|LTB
cg01604429	1	Clear cell renal carcinoma	MST1
cg01606885	1	Ageing, Sex	ACY1
cg01612140	1	Clear cell renal carcinoma, Pancreatic ductal adenocarcinoma, Sex	MMP.1
cg01612247	1	Pancreatic ductal adenocarcinoma	CD209
cg01616085	1		TNFRSF17
cg01616489	1		CCL21
cg01618083	1		MMP1
cg01620164	1	Sex, Fetal vs adult liver	MIA
cg01620360	1		B2M
cg01620672	1		OMD
cg01624202	1	Gestational age	ACY1
cg01631319	1		SKR3
cg01640443	1		OMD
cg01640660	1	Age 4 vs age 0	TPSB2
cg01645998	1	Sex	MMP1
cg01647917	1		CRP
cg01649064	1		GHR
cg01656750	1		PAPPA
cg01660473	1		ICAM5
cg01661567	1	Age	CCL21
cg01666244	1	Rheumatoid arthritis	SEMA3E
cg01666416	1		CHIT1
cg01666550	1		IGFBP1
cg01667493	1		MMP12
cg01667892	1	Sex	CCL18
cg01675158	1	Gestational age, Sex	ACY1
cg01678091	1		CLEC11A
cg01678790	1		OMD
cg01692110	1	Clear cell renal carcinoma, Gestational age	FCER2
cg01692968	1	Smoking, Sex, Tobacco smoking	MMP12
cg01702520	1		TNFRSF1B
cg01702820	1	Rheumatoid arthritis	CNTN4
cg01703205	1	Clear cell renal carcinoma	NTRK3
cg01704580	1		LGALS3BP
cg01704924	1		LY9
cg01708552	1	Gestational age	SELE
cg01715551	1		MIA
cg01719405	1	Clear cell renal carcinoma, Ageing, Age 4 vs age 0	SELL
cg01720013	1		CXCL11
cg01725872	1	Clear cell renal carcinoma	EZR
cg01730148	1		MMP.1
cg01732463	1		CLEC11A
cg01736243	1	Sex	NTRK3
cg01738650	1		C5
cg01747664	1	Fetal vs adult liver, Age 4 vs age 0, Age	FGF.21
cg01751245	1	Clear cell renal carcinoma, Pancreatic ductal adenocarcinoma, Gestational age	GP1BA
cg01756799	1	Fetal vs adult liver	LTF
cg01757548	1		FCGR3B
cg01758899	1	Fetal vs adult liver	NMNAT1
cg01758993	1	Rheumatoid arthritis	SERPINA3
cg01760178	1		CXCL11
cg01761409	1		CRTAM
cg01767200	1		OMD
cg01768960	1		CLEC11A
cg01770707	1		CCL17
cg01776246	1		CRP
cg01781018	1	Clear cell renal carcinoma	FAP
cg01786994	1	Clear cell renal carcinoma, Smoking	ICAM5
cg01789150	1		TNFRSF1B
cg01790628	1	Clear cell renal carcinoma	RARRES2
cg01791906	1		FAP
cg01792229	1		ACY1
cg01793161	1		EN.RAGE
cg01796676	1		ENPP7
cg01799015	1	Gestational age, Primary Sjogrens syndrome	FAP
cg01802258	1	Clear cell renal carcinoma, Pancreatic ductal adenocarcinoma	FCER2
cg01802713	1	Clear cell renal carcinoma, Gestational age, Primary Sjogrens syndrome, Age 4 vs age 0	SERPINA3
cg01806442	1		ENPP7
cg01813393	1	Gestational age	CXCL11
cg01816258	1		FGF.21
cg01817897	1		B2M
cg01820106	1		C5
cg01820962	1	Primary Sjogrens syndrome	CHIT1
cg01827818	1	Rheumatoid arthritis	CRP
cg01827933	1	Age 4 vs age 0	SELE
cg01829163	1	Fetal vs adult liver	FGF.21
cg01831476	1		GP1BA
cg01833122	1		LGALS3BP
cg01834979	1	Age 4 vs age 0	ENPP7
cg01836137	1	Fetal vs adult liver, Age 4 vs age 0	GHR
cg01836441	1	Rheumatoid arthritis	MMP1
cg01839492	1		TNFRSF17
cg01842720	1	Fetal vs adult liver	FCER2
cg01850934	1		LTF
cg01853541	1		LGALS4
cg01854076	1	Sex	OMD
cg01855313	1		THBS2
cg01855760	1		C9
cg01861377	1		SLITRK5
cg01867647	1		SERPINA3
cg01877196	1		LY9
cg01881688	1		CHIT1
cg01883757	1	Rheumatoid arthritis	CHIT1
cg01893669	1		GP1BA
cg01895740	1		SMPD1
cg01898867	1	Clear cell renal carcinoma	MMP12
cg01899089	1	Smoking, Maternal smoking in pregnancy, Tobacco smoking	CXCL10
cg01901332	1	Smoking, Age 4 vs age 0, Tobacco smoking	VEGFA
cg01904812	1	Age 4 vs age 0	THBS2
cg01904886	1	Primary Sjogrens syndrome	CHIT1
cg01906430	1		CCL17
cg01907658	1	Rheumatoid arthritis	MST1
cg01911082	1		MMP1
cg01912040	1	Age 4 vs age 0	MPO
cg01914278	1		MMP.1
cg01915283	1		CCL18
cg01915516	1	Clear cell renal carcinoma, Ageing	GZMA
cg01921059	1	Clear cell renal carcinoma	CXCL11
cg01922433	1		CXCL11
cg01923473	1		HGFAC
cg01923514	1		GP1BA
cg01926051	1		CCL17
cg01928910	1	Rheumatoid arthritis, HIV infection	MIA
cg01929435	1		MST1
cg01931685	1		B2M
cg01934408	1		C5
cg01935096	1		SERPINA3
cg01939443	1		C5
cg01941278	1	Pancreatic ductal adenocarcinoma, Gestational age	MMP12
cg01943585	1		SERPINA3
cg01949171	1		MMP1
cg01950680	1		LY9
cg01953615	1	Clear cell renal carcinoma	CCL17
cg01957088	1		CD209
cg01957760	1		CD5L
cg01959873	1	Clear cell renal carcinoma	MMP12
cg01961278	1		ACY1
cg01961825	1	Clear cell renal carcinoma	LY9
cg01965673	1		MRC2
cg01970336	1	Fetal vs adult liver, Age 4 vs age 0	LGALS4
cg01971363	1	Gestational age	LTA|LTB
cg01971676	1		GHR
cg01972316	1		C5
cg01972818	1		B2M
cg01973483	1	Fetal vs adult liver, Ageing, Gestational age, Serum total cholesterol	GZMA
cg01975529	1		CXCL10
cg01976303	1		RARRES2
cg01977863	1	Clear cell renal carcinoma	MMP9
cg01988891	1	Fetal vs adult liver	SELL
cg01996497	1	Rheumatoid arthritis	RARRES2
cg01997599	1		N.CDase
cg01999787	1		FCGR3B
cg02004723	1		THBS2
cg02016065	1		CD5L
cg02019774	1	Pancreatic ductal adenocarcinoma	CXCL11
cg02021641	1		N.CDase
cg02022494	1		CCL17
cg02022808	1		TNFRSF1B
cg02026948	1		LY9
cg02028663	1	Age 4 vs age 0	TNFRSF17
cg02030270	1		VCAM1
cg02034204	1		FCER2
cg02037863	1	HIV infection	THBS2
cg02040387	1		SERPINA3
cg02046143	1	Sex, Age 4 vs age 0, Age	STC1
cg02048220	1	Gestational age	RETN
cg02049041	1		PIGR
cg02055483	1		CXCL11
cg02058483	1		ACY1
cg02060584	1		IGFBP4
cg02061047	1		GZMA
cg02063203	1		NTRK3
cg02063828	1	Rheumatoid arthritis	C5
cg02064267	1	Clear cell renal carcinoma, Pancreatic ductal adenocarcinoma, Gestational age	SLITRK5
cg02068388	1	Rheumatoid arthritis, Clear cell renal carcinoma	C9
cg02069674	1		IGFBP1
cg02069772	1		IL19
cg02069999	1		ACY1
cg02070077	1	Gestational age	THBS2
cg02077793	1		C9
cg02083319	1		VEGFA
cg02086310	1	Fetal vs adult liver	GZMA
cg02086858	1	Rheumatoid arthritis	THBS2
cg02090569	1		MMP12
cg02091781	1	Fetal vs adult liver, Gestational age, Age 4 vs age 0	MMP1
cg02095530	1		SERPINA3
cg02096194	1		LY9
cg02099390	1	Gestational age	BMP1
cg02100343	1	Rheumatoid arthritis	HGFAC
cg02100604	1		ACY1
cg02103362	1		IL19
cg02107879	1		CCL17
cg02110529	1		ACY1
cg02113214	1		SELE
cg02114909	1		PAPPA
cg02117713	1	Rheumatoid arthritis	NTRK3
cg02119091	1		ACY1
cg02119938	1	Clear cell renal carcinoma, Body mass index, Waist circumference	ESM1
cg02126031	1	Fetal vs adult liver, Gestational age	CXCL10
cg02127118	1	Rheumatoid arthritis	B2M
cg02130329	1	Ageing	GP1BA
cg02130555	1		C9
cg02133716	1	Fetal vs adult liver	CCL18
cg02140171	1	HIV infection	SMPD1
cg02141675	1	Gestational age	B2M
cg02143877	1	Pancreatic ductal adenocarcinoma	MMP1
cg02146941	1		SPOCK2
cg02147989	1	Primary Sjogrens syndrome	CD163
cg02152265	1		CCL18
cg02154874	1		LGALS3BP
cg02155829	1		CCL21
cg02158199	1		FAP
cg02162339	1		BMP1
cg02165692	1	Clear cell renal carcinoma	NTRK3
cg02166313	1	Rheumatoid arthritis	CD5L
cg02169859	1	Rheumatoid arthritis	LGALS3BP
cg02180766	1		CCL22
cg02183025	1		GZMA
cg02190636	1		SERPINA3
cg02190928	1		LGALS3BP
cg02193951	1		ACY1
cg02194243	1		C5
cg02194789	1	Rheumatoid arthritis	CD209
cg02196294	1		THBS2
cg02204618	1	Pancreatic ductal adenocarcinoma	WFIKKN2
cg02219159	1		ACY1
cg02220481	1		GNLY
cg02226688	1		SERPINA3
cg02227919	1	Fetal vs adult liver	NTRK3
cg02236651	1	Rheumatoid arthritis	CCL17
cg02239968	1		SELE
cg02240171	1		MMP1
cg02246225	1		CXCL10
cg02249074	1		CXCL11
cg02261696	1		FCER2
cg02262056	1		FcRL2
cg02269952	1		LY9
cg02270108	1		G.CSF
cg02270541	1	Rheumatoid arthritis	SKR3
cg02271560	1		SKR3
cg02272576	1	Fetal vs adult liver, Gestational age	SERPINA3
cg02272993	1	HIV infection	LY9
cg02274103	1		THBS2
cg02276763	1		CCL22
cg02286008	1	Rheumatoid arthritis	BMP1
cg02287371	1	Sex	SHBG
cg02288684	1		CCL18
cg02289376	1		CCL17
cg02291365	1	Clear cell renal carcinoma, Fetal vs adult liver, Gestational age	SLITRK5
cg02292533	1		B2M
cg02292704	1		CCL17
cg02293668	1		GHR
cg02296583	1		C9
cg02298956	1		SEMA3E
cg02299568	1		CXCL10
cg02299586	1		SERPINA3
cg02301929	1		CCL17
cg02302400	1		IDUA
cg02304156	1		MPO
cg02307664	1		ACY1
cg02309882	1		CXCL10
cg02311534	1		CCL17
cg02314091	1		ACY1
cg02314348	1	Pancreatic ductal adenocarcinoma	GP1BA
cg02314702	1		CLEC11A
cg02318926	1	Clear cell renal carcinoma, Pancreatic ductal adenocarcinoma	CD6
cg02325540	1		STC1
cg02326058	1	Fetal vs adult liver, Primary Sjogrens syndrome, Smoking, Gestational age, Age 4 vs age 0	FCGR3B
cg02331769	1		SERPINA3
cg02336364	1	Gestational age	CXCL10
cg02337166	1	Rheumatoid arthritis	CXCL10
cg02340576	1		C5
cg02341038	1		LGALS4
cg02342974	1	Rheumatoid arthritis	C5
cg02346997	1	Plasma resistin level	RETN
cg02347487	1	Sex	VEGFA
cg02347652	1	Fetal vs adult liver	NOTCH1
cg02361903	1	Age 4 vs age 0	FCER2
cg02367916	1		SPOCK2
cg02369775	1		MMP1
cg02370100	1	Age 4 vs age 0, Serum triglycerides	ACY1
cg02372404	1		FGF.21
cg02378269	1	Fetal vs adult liver, Age 4 vs age 0	MMP12
cg02383651	1		CHIT1
cg02384501	1	Rheumatoid arthritis	GP1BA
cg02398342	1	Fetal vs adult liver	C5
cg02401978	1	Age 4 vs age 0	B2M
cg02402368	1	Pancreatic ductal adenocarcinoma, Smoking	WFIKKN2
cg02405003	1	Gestational age	CRTAM
cg02413092	1		NMNAT1
cg02415029	1	Fetal vs adult liver	MMP12
cg02415661	1		CD5L
cg02416424	1		SERPINA3
cg02417857	1	Body mass index, Age 4 vs age 0	SELE
cg02421543	1	Rheumatoid arthritis	CXCL11
cg02422426	1		TNFRSF17
cg02424179	1		ICAM5
cg02424715	1	Gestational age, Sex	ACY1
cg02429622	1		SLITRK5
cg02442900	1	Fetal vs adult liver, Gestational age, Smoking	SERPIND1
cg02443816	1		ADAMTS13
cg02447879	1	Gestational age	C5
cg02449975	1		CCL17
cg02450742	1		GP1BA
cg02452500	1		CCL18
cg02453013	1		TPSB2
cg02456521	1		OMD
cg02460251	1	Clear cell renal carcinoma, Fetal vs adult liver	MMP12
cg02461391	1	Rheumatoid arthritis	LGALS4
cg02462812	1		CXCL9
cg02463911	1		CCL17
cg02467858	1		MMP12
cg02469539	1		C5
cg02470179	1	Clear cell renal carcinoma	MMP12
cg02471512	1		CD209
cg02476533	1		CXCL9
cg02480397	1		OMD
cg02481307	1	Fetal vs adult liver, Age 4 vs age 0	GHR
cg02481528	1		B2M
cg02481950	1	C-reactive protein	CXCL10
cg02486520	1		SKR3
cg02489492	1		SERPINA3
cg02489685	1		CCL17
cg02491878	1		MMP12
cg02492279	1	Clear cell renal carcinoma	CD5L
cg02501544	1		OMD
cg02504211	1		SLITRK5
cg02512202	1		SMPD1
cg02512724	1		ACY1
cg02512860	1	Fetal vs adult liver	TPSB2
cg02513874	1		MMP1
cg02513924	1		C5
cg02520020	1	Fetal vs adult liver	SLITRK5
cg02526838	1	Pancreatic ductal adenocarcinoma	SELE
cg02527881	1	Fetal vs adult liver, Age 4 vs age 0	SLITRK5
cg02531548	1		CD209
cg02535223	1	Gestational age, Age 4 vs age 0	NTRK3
cg02535924	1		LGALS3BP
cg02538248	1	Pancreatic ductal adenocarcinoma, Fetal vs adult liver	MMP1
cg02538976	1		RARRES2
cg02539798	1		RARRES2
cg02553070	1	Sex	NCAM1
cg02553516	1		LGALS3BP
cg02554810	1		MMP12
cg02570682	1		SERPINA3
cg02570977	1		NTRK3
cg02583589	1	Clear cell renal carcinoma	CXCL10
cg02583620	1	Rheumatoid arthritis, Clear cell renal carcinoma, Autoantibody production in systemic lupus erythematosus	MMP1
cg02585745	1		VEGFA
cg02587643	1	Rheumatoid arthritis	GZMA
cg02590038	1	Rheumatoid arthritis	NTRK3
cg02590409	1		SERPINA3
cg02595823	1	Fetal vs adult liver, Gestational age	GZMA
cg02605601	1	Clear cell renal carcinoma, Fetal vs adult liver	CXCL10
cg02607786	1	Rheumatoid arthritis	MMP12
cg02609733	1		MMP1
cg02611934	1	Gestational age	SLITRK5
cg02613937	1		FCER2
cg02614549	1	Clear cell renal carcinoma	GP1BA
cg02619408	1	Fetal vs adult liver	RARRES2
cg02622803	1		CLEC11A
cg02624284	1		FCGR3B
cg02625638	1		SKR3
cg02630888	1	Fetal vs adult liver, Sex	CCL11
cg02633149	1		INSR
cg02634272	1		CHIT1
cg02635260	1	Fetal vs adult liver	MMP12
cg02636222	1		ACY1
cg02639294	1	Primary Sjogrens syndrome	STC1
cg02642126	1	Fetal vs adult liver, Age 4 vs age 0	MST1
cg02642891	1	Gestational age	SERPIND1
cg02643218	1	Rheumatoid arthritis	SELE
cg02658668	1		C5
cg02662495	1	Gestational age, Age 4 vs age 0	GZMA
cg02667677	1		ICAM5
cg02673002	1		CCL17
cg02673901	1	Gestational age	LY9
cg02674662	1		CD209
cg02683509	1		FGF.21
cg02683731	1		B2M
cg02684904	1		IGFBP1
cg02691360	1	Age 4 vs age 0	CLEC11A
cg02693438	1		LGALS4
cg02695698	1		CXCL10
cg02699447	1		B2M
cg02704552	1	Age 4 vs age 0	CCL17
cg02705759	1		CCL17
cg02707277	1		SERPINA3
cg02711665	1		B2M
cg02712555	1		FGF.21
cg02713901	1		OMD
cg02715797	1	Rheumatoid arthritis	IL19
cg02716826	1	Fetal vs adult liver, Age, Gestational age, C-reactive protein, Body mass index	RARRES2
cg02718966	1	Sex	TGF.alpha
cg02720725	1		NEP
cg02727219	1		THBS2
cg02727227	1		IGFBP1
cg02728263	1	Gestational age	SMPD1
cg02729383	1	Fetal vs adult liver	SLITRK5
cg02732671	1		SERPINA3
cg02735762	1	Gestational age	NCAM1
cg02736204	1		C9
cg02737268	1	Clear cell renal carcinoma	LTA|LTB
cg02740128	1		ICAM5
cg02741521	1	Ageing	VCAM1
cg02741985	1		C9
cg02757802	1		CCL17
cg02762393	1		IL19
cg02763803	1		TPSB2
cg02767788	1		CLEC11A
cg02768139	1	Rheumatoid arthritis, HIV infection	MST1
cg02769951	1		CRP
cg02770406	1		MMP1
cg02770683	1		ACY1
cg02773192	1		SEMA3E
cg02776313	1		SMPD1
cg02776628	1		CCL17
cg02783838	1		TNFRSF17
cg02785814	1		CLEC11A
cg02790691	1		IGFBP4
cg02794104	1		MMP12
cg02795546	1	Rheumatoid arthritis	IGFBP4
cg02796773	1		TNFRSF1B
cg02801839	1		CXCL10
cg02808338	1	Rheumatoid arthritis	TNFRSF17
cg02810156	1	Rheumatoid arthritis	CCL11
cg02812767	1		ADAMTS13
cg02814054	1		SIGLEC1
cg02821693	1		OMD
cg02825630	1		GZMA
cg02826685	1		MMP12
cg02828514	1	Rheumatoid arthritis	N.CDase
cg02833116	1		CCL17
cg02840535	1		CCL11
cg02849754	1		B2M
cg02850416	1		THBS2
cg02851049	1		TNFRSF17
cg02853948	1	Gestational age	MMP.1
cg02856688	1	Gestational age, Primary Sjogrens syndrome	S100A9
cg02858402	1		SELL
cg02861056	1	Clear cell renal carcinoma	CCL21
cg02864688	1		C5
cg02867102	1		SELL
cg02872767	1		N.CDase
cg02875240	1		MMP1
cg02877029	1	Gestational age	GP1BA
cg02878414	1		TNFRSF17
cg02878901	1		OSM
cg02883668	1	Sex	NMNAT1
cg02887499	1	Rheumatoid arthritis	THBS2
cg02888990	1		CRP
cg02892898	1		CD48
cg02893348	1	HIV infection	GHR
cg02893550	1	Pancreatic ductal adenocarcinoma, Gestational age	ACY1
cg02897449	1		LTF
cg02897570	1		B2M
cg02901122	1	Rheumatoid arthritis	MMP12
cg02901408	1		FCER2
cg02902617	1		ADAMTS13
cg02904344	1		NTRK3
cg02907402	1		NCAM1
cg02914097	1	Pancreatic ductal adenocarcinoma, Fetal vs adult liver, Age 4 vs age 0	G.CSF
cg02915221	1	Rheumatoid arthritis	CXCL10
cg02915225	1	Gestational age	MMP12
cg02921887	1		FCGR3B
cg02922732	1		CXCL10
cg02927747	1		ADAMTS13
cg02928476	1	Rheumatoid arthritis	B2M
cg02930132	1		C9
cg02930687	1		NTRK3
cg02938205	1	Clear cell renal carcinoma	MST1
cg02942287	1		B2M
cg02950892	1	Clear cell renal carcinoma	THBS2
cg02951971	1		TNFRSF17
cg02954324	1	Clear cell renal carcinoma, Ageing	MMP1
cg02954903	1		FGF.21
cg02963689	1		C5
cg02969716	1	Rheumatoid arthritis	CXCL10
cg02970679	1	Total serum IgE	CCL11
cg02970919	1		SERPINA3
cg02971546	1	Rheumatoid arthritis, Sex, Gestational age	B2M
cg02974085	1	Pancreatic ductal adenocarcinoma	MMP12
cg02976109	1	Sex	TPSB2
cg02976568	1		IDUA
cg02981078	1		ADAMTS13
cg02981703	1		CD163
cg02986791	1		CLEC11A
cg02987199	1		TGF.alpha
cg02988316	1		C5
cg02991571	1		TGF.alpha
cg02994246	1		GP1BA
cg02994291	1		MMP12
cg02995791	1		IGFBP1
cg02996314	1	Child abuse	CRP
cg02997497	1		SEMA3E
cg02998240	1	Pancreatic ductal adenocarcinoma, Gestational age, Smoking	FGF.21
cg02998278	1		ACY1
cg02999390	1		OMD
cg03002586	1		SPOCK2
cg03005362	1	Clear cell renal carcinoma	MMP1
cg03011024	1		C5
cg03011500	1		CD209
cg03014934	1	Fetal vs adult liver, Age 4 vs age 0	CD209
cg03023437	1	Rheumatoid arthritis	GP1BA
cg03032053	1	Fetal vs adult liver	C9
cg03032497	1	Age, Fetal vs adult liver, Ageing	N.CDase
cg03033344	1		SERPINA3
cg03035538	1	Gestational age	SLITRK5
cg03037033	1		ESM1
cg03038061	1		MMP1
cg03039315	1		SMPD1
cg03043157	1	Fetal vs adult liver, Gestational age, Age 4 vs age 0, Age	BMP1
cg03046611	1	Gestational age	WFIKKN2
cg03046746	1	Rheumatoid arthritis	CRP
cg03052099	1		ICAM5
cg03053687	1	Rheumatoid arthritis	NTRK3
cg03053893	1		ACY1
cg03054277	1	Ageing, Age 4 vs age 0	MMP12
cg03056436	1	Rheumatoid arthritis	SELE
cg03059382	1		INSR
cg03069282	1	Rheumatoid arthritis	NTRK3
cg03070262	1		SLITRK5
cg03097336	1	Rheumatoid arthritis	SERPIND1
cg03102879	1		MMP1
cg03108070	1	Sex, Gestational age	BMP1
cg03109964	1	Rheumatoid arthritis	LGALS3BP
cg03112033	1		CCL17
cg03114244	1		GP1BA
cg03114636	1	Rheumatoid arthritis	MMP12
cg03118604	1		CD5L
cg03123608	1		ACY1
cg03125531	1	Fetal vs adult liver	SELE
cg03127656	1	Rheumatoid arthritis	OMD
cg03130816	1	Clear cell renal carcinoma, Gestational age	OMD
cg03132729	1	Fetal vs adult liver, Gestational age, Sex	CXCL10
cg03137889	1	Fetal vs adult liver	MMP1
cg03142458	1		CHIT1
cg03142751	1	Rheumatoid arthritis	FCER2
cg03143365	1		VEGFA
cg03143457	1	Fetal vs adult liver	CCL17
cg03145124	1		MMP1
cg03145486	1		C5
cg03150220	1		CHIT1
cg03168184	1		MST1
cg03170725	1	HIV infection	LY9
cg03172057	1	Rheumatoid arthritis	B2M
cg03173462	1		CCL17
cg03182620	1	Clear cell renal carcinoma	MST1
cg03183451	1	Rheumatoid arthritis	CNTN4
cg03192919	1		CLEC11A
cg03197992	1		CCL11
cg03202935	1		C5
cg03203287	1	Pancreatic ductal adenocarcinoma	SMPD1
cg03205046	1		THBS2
cg03207593	1		CRTAM
cg03211283	1		LTF
cg03217209	1		MMP12
cg03225235	1		MMP1
cg03226554	1		EN.RAGE
cg03234661	1		ACY1
cg03238702	1		CD163
cg03243506	1	Age 4 vs age 0	CXCL10
cg03243768	1	Pancreatic ductal adenocarcinoma	B2M
cg03244277	1		N.CDase
cg03251287	1		GHR
cg03253831	1		SELE
cg03256729	1	Rheumatoid arthritis	CXCL11
cg03257255	1	Clear cell renal carcinoma	GP1BA
cg03257743	1		C5
cg03258421	1		CXCL10
cg03259564	1	Fetal vs adult liver	SMPD1
cg03261004	1		SEMA3E
cg03263197	1		SPOCK2
cg03264550	1		IGFBP4
cg03268463	1		SERPINA3
cg03268697	1	Clear cell renal carcinoma	MRC2
cg03269363	1		SKR3
cg03273320	1		CCL17
cg03275698	1		CCL18
cg03277550	1		SMPD1
cg03282932	1		ACY1
cg03286535	1	Fetal vs adult liver, Gestational age	MMP9
cg03287432	1		TPSB2
cg03293765	1	Rheumatoid arthritis	TNFRSF17
cg03294961	1		IGFBP4
cg03298834	1		CCL17
cg03301331	1	Age	CCL18
cg03301671	1	Clear cell renal carcinoma	SMPD1
cg03303162	1		RARRES2
cg03307581	1		C5
cg03307911	1	Rheumatoid arthritis	CCL11
cg03309393	1	Pancreatic ductal adenocarcinoma, Gestational age	RARRES2
cg03310838	1		IGFBP4
cg03314137	1		LY9
cg03314158	1		SMPD1
cg03316174	1	Rheumatoid arthritis	CCL25
cg03317682	1		C4A|C4B
cg03319082	1		TPSB2
cg03320005	1		SERPIND1
cg03320255	1	Clear cell renal carcinoma, HIV infection	CXCL11
cg03323598	1		MMP9
cg03326252	1	Age 4 vs age 0	NCAM1
cg03329747	1	Rheumatoid arthritis	ACY1
cg03333188	1	Fetal vs adult liver	B2M
cg03336504	1	HIV infection	CRP
cg03338682	1		ACY1
cg03345093	1		FcRL2
cg03349134	1	Pancreatic ductal adenocarcinoma	CXCL10
cg03350299	1	Sex	ACY1
cg03352168	1		MMP12
cg03356490	1		TNFRSF17
cg03357999	1		MST1
cg03358468	1	Clear cell renal carcinoma	FcRL2
cg03359285	1		IDUA
cg03366382	1		THBS2
cg03369247	1		CCL17
cg03371275	1	Clear cell renal carcinoma, Gestational age	S100A9
cg03371384	1	Gestational age	TPSB2
cg03375579	1	Rheumatoid arthritis	VEGFA
cg03383695	1	Rheumatoid arthritis	MST1
cg03384440	1		CCL17
cg03389046	1	Gestational age	LGALS3BP
cg03389701	1	Gestational age	FCER2
cg03389928	1		CCL25
cg03394018	1		SPOCK2
cg03397031	1		C5
cg03398691	1		LGALS3BP
cg03402629	1		CCL17
cg03403093	1	Age 4 vs age 0	N.CDase
cg03403996	1	Utero arsenic exposure	FCER2
cg03404662	1	Gestational age	CXCL9
cg03405789	1	Gestational age	ENPP7
cg03407666	1		NCAM1
cg03412967	1		MIA
cg03414471	1		CXCL11
cg03418847	1	Fetal vs adult liver	CCL17
cg03418876	1		NTRK3
cg03423395	1		CXCL10
cg03427576	1	HIV infection	ACY1
cg03429569	1	Rheumatoid arthritis	N.CDase
cg03431155	1	Rheumatoid arthritis	CCL11
cg03431738	1	Gestational age	ACY1
cg03438305	1	Sex	ICAM5
cg03438674	1		B2M
cg03440556	1	Clear cell renal carcinoma, Pancreatic ductal adenocarcinoma, Age 4 vs age 0	ACY1
cg03444566	1		GHR
cg03446098	1		CRP
cg03447327	1		RARRES2
cg03448754	1		CCL21
cg03454353	1	Sex	G.CSF
cg03457472	1	Fetal vs adult liver, Gestational age	B2M
cg03461641	1	Age 4 vs age 0	CRTAM
cg03462943	1		SELL
cg03464232	1		CRP
cg03464529	1		CCL17
cg03465682	1		FCGR3B
cg03469456	1		FCER2
cg03473532	1	Ageing, Primary Sjogrens syndrome, Age	MMP12
cg03476525	1		CD209
cg03476860	1		RARRES2
cg03480698	1		LTA|LTB
cg03482866	1		CXCL10
cg03485262	1		MST1
cg03488422	1		CCL17
cg03489416	1	Rheumatoid arthritis	ICAM5
cg03489492	1		SERPINA3
cg03493361	1		IGFBP1
cg03505857	1		NCAM1
cg03506979	1		SEMA3E
cg03507277	1		CCL25
cg03508212	1		FCER2
cg03508526	1	Rheumatoid arthritis	CXCL10
cg03509777	1		MMP12
cg03510310	1	Fetal vs adult liver	CCL17
cg03510477	1	Gestational age	N.CDase
cg03512172	1	Fetal vs adult liver, Gestational age	B2M
cg03514188	1		SMPD1
[truncated: 7,103 more rows]

## Sheet: 1H
1H. FUMA canonical pathway GeneSet enrichment results for the genes encoding the 109 proteins used to train protein EpiScores.
FUMA Pathway Category	GeneSet	N_genes	N_overlap	P	Adjusted P	Genes selected	Link to GeneSets
Canonical_Pathways	NABA_MATRISOME_ASSOCIATED	743	37	1.04772e-26	1.15197e-23	S100A9:S100A12:IL19:MMP1:F7:MMP2:CCL22:CCL17:CCL11:CCL18:CSF3:WFIKKN2:CD209:CCL25:LGALS4:FGF21:CLEC11A:TGFA:MSTN:MMP9:SERPIND1:OSM:MST1:HGFAC:CXCL9:CXCL10:CXCL11:LTA:LTB:VEGFA:HGF:SEMA3E:BMP1:CCL21:PAPPA:ADAMTS13:EDA	http://www.gsea-msigdb.org/gsea/msigdb/cards/NABA_MATRISOME_ASSOCIATED
Canonical_Pathways	NABA_SECRETED_FACTORS	342	25	6.64598e-22	4.8715e-19	S100A9:S100A12:IL19:CCL22:CCL17:CCL11:CCL18:CSF3:WFIKKN2:CCL25:FGF21:TGFA:MSTN:OSM:MST1:HGFAC:CXCL9:CXCL10:CXCL11:LTA:LTB:VEGFA:HGF:CCL21:EDA	http://www.gsea-msigdb.org/gsea/msigdb/cards/NABA_SECRETED_FACTORS
Canonical_Pathways	KEGG_CYTOKINE_CYTOKINE_RECEPTOR_INTERACTION	264	22	1.49925e-20	8.24213e-18	TNFRSF1B:MPL:IL19:ACVRL1:TNFRSF17:CCL22:CCL17:CCL11:CCL18:CSF3:CCL25:OSM:CXCL9:CXCL10:CXCL11:GHR:LTA:LTB:VEGFA:HGF:CCL21:EDA	http://www.gsea-msigdb.org/gsea/msigdb/cards/KEGG_CYTOKINE_CYTOKINE_RECEPTOR_INTERACTION
Canonical_Pathways	REACTOME_INTERLEUKIN_4_AND_INTERLEUKIN_13_SIGNALING	108	11	1.06e-11	4.66186e-09	TNFRSF1B:VCAM1:MMP1:MMP2:CCL22:CCL11:FCER2:MMP9:OSM:VEGFA:HGF	http://www.gsea-msigdb.org/gsea/msigdb/cards/REACTOME_INTERLEUKIN_4_AND_INTERLEUKIN_13_SIGNALING
Canonical_Pathways	REACTOME_CYTOKINE_SIGNALING_IN_IMMUNE_SYSTEM	848	23	5.77867e-11	2.11788e-08	TNFRSF1B:VCAM1:S100A12:IL19:MMP1:NCAM1:B2M:TNFRSF17:MMP2:CCL22:CCL11:CSF3:FCER2:TGFA:MMP9:OSM:CXCL10:GHR:LTA:LTB:VEGFA:HGF:EDA	http://www.gsea-msigdb.org/gsea/msigdb/cards/REACTOME_CYTOKINE_SIGNALING_IN_IMMUNE_SYSTEM
Canonical_Pathways	REACTOME_INNATE_IMMUNE_SYSTEM	1040	23	3.07243e-09	9.65182e-07	TNFRSF1B:S100A9:S100A12:CRP:FCGR3B:SELL:CHIT1:PIGR:LYZ:B2M:CCL22:CCL17:MPO:RETN:CD209:GNLY:MMP9:LTF:MME:C9:C4A:C4B:C5	http://www.gsea-msigdb.org/gsea/msigdb/cards/REACTOME_INNATE_IMMUNE_SYSTEM
Canonical_Pathways	REACTOME_SIGNALING_BY_INTERLEUKINS	627	17	2.59301e-08	7.12754e-06	TNFRSF1B:VCAM1:S100A12:IL19:MMP1:NCAM1:MMP2:CCL22:CCL11:CSF3:FCER2:TGFA:MMP9:OSM:CXCL10:VEGFA:HGF	http://www.gsea-msigdb.org/gsea/msigdb/cards/REACTOME_SIGNALING_BY_INTERLEUKINS
Canonical_Pathways	REACTOME_NEUTROPHIL_DEGRANULATION	475	14	1.82118e-07	4.44974e-05	TNFRSF1B:S100A9:S100A12:FCGR3B:SELL:CHIT1:PIGR:LYZ:B2M:MPO:RETN:MMP9:LTF:MME	http://www.gsea-msigdb.org/gsea/msigdb/cards/REACTOME_NEUTROPHIL_DEGRANULATION
Canonical_Pathways	BIOCARTA_LECTIN_PATHWAY	12	4	3.40286e-07	7.48288e-05	C9:C4A:C4B:C5	http://www.gsea-msigdb.org/gsea/msigdb/cards/BIOCARTA_LECTIN_PATHWAY
Canonical_Pathways	KEGG_CHEMOKINE_SIGNALING_PATHWAY	188	9	6.3619e-07	0.000125088	CCL22:CCL17:CCL11:CCL18:CCL25:CXCL9:CXCL10:CXCL11:CCL21	http://www.gsea-msigdb.org/gsea/msigdb/cards/KEGG_CHEMOKINE_SIGNALING_PATHWAY
Canonical_Pathways	BIOCARTA_CLASSIC_PATHWAY	14	4	6.82609e-07	0.000125088	C9:C4A:C4B:C5	http://www.gsea-msigdb.org/gsea/msigdb/cards/BIOCARTA_CLASSIC_PATHWAY
Canonical_Pathways	KEGG_COMPLEMENT_AND_COAGULATION_CASCADES	69	6	1.63493e-06	0.000276555	F7:SERPIND1:C9:C4A:C4B:C5	http://www.gsea-msigdb.org/gsea/msigdb/cards/KEGG_COMPLEMENT_AND_COAGULATION_CASCADES
Canonical_Pathways	BIOCARTA_COMP_PATHWAY	19	4	2.59044e-06	0.000406884	C9:C4A:C4B:C5	http://www.gsea-msigdb.org/gsea/msigdb/cards/BIOCARTA_COMP_PATHWAY
Canonical_Pathways	REACTOME_REGULATION_OF_INSULIN_LIKE_GROWTH_FACTOR_IGF_TRANSPORT_AND_UPTAKE_BY_INSULIN_LIKE_GROWTH_FACTOR_BINDING_PROTEINS_IGFBPS	124	7	4.0078e-06	0.000567807	MMP1:MMP2:IGFBP4:SERPIND1:C4A:IGFBP1:PAPPA	http://www.gsea-msigdb.org/gsea/msigdb/cards/REACTOME_REGULATION_OF_INSULIN_LIKE_GROWTH_FACTOR_IGF_TRANSPORT_AND_UPTAKE_BY_INSULIN_LIKE_GROWTH_FACTOR_BINDING_PROTEINS_IGFBPS
Canonical_Pathways	REACTOME_INTERLEUKIN_10_SIGNALING	46	5	4.13138e-06	0.000567807	TNFRSF1B:CCL22:CSF3:FCER2:CXCL10	http://www.gsea-msigdb.org/gsea/msigdb/cards/REACTOME_INTERLEUKIN_10_SIGNALING
Canonical_Pathways	REACTOME_ACTIVATION_OF_C3_AND_C5	7	3	4.81289e-06	0.000622562	C4A:C4B:C5	http://www.gsea-msigdb.org/gsea/msigdb/cards/REACTOME_ACTIVATION_OF_C3_AND_C5
Canonical_Pathways	REACTOME_CHEMOKINE_RECEPTORS_BIND_CHEMOKINES	48	5	5.11817e-06	0.00062527	CCL25:CXCL9:CXCL10:CXCL11:CCL21	http://www.gsea-msigdb.org/gsea/msigdb/cards/REACTOME_CHEMOKINE_RECEPTORS_BIND_CHEMOKINES
Canonical_Pathways	REACTOME_COMPLEMENT_CASCADE	57	5	1.20572e-05	0.00139547	CRP:C9:C4A:C4B:C5	http://www.gsea-msigdb.org/gsea/msigdb/cards/REACTOME_COMPLEMENT_CASCADE
Canonical_Pathways	REACTOME_TNFS_BIND_THEIR_PHYSIOLOGICAL_RECEPTORS	28	4	1.31972e-05	0.00145103	TNFRSF1B:TNFRSF17:LTA:EDA	http://www.gsea-msigdb.org/gsea/msigdb/cards/REACTOME_TNFS_BIND_THEIR_PHYSIOLOGICAL_RECEPTORS
Canonical_Pathways	PID_IL4_2PATHWAY	61	5	1.68497e-05	0.0017644	PIGR:CCL17:CCL11:FCER2:LTA	http://www.gsea-msigdb.org/gsea/msigdb/cards/PID_IL4_2PATHWAY
Canonical_Pathways	NABA_ECM_REGULATORS	233	8	3.10821e-05	0.0031068	MMP1:F7:MMP2:MMP9:SERPIND1:BMP1:PAPPA:ADAMTS13	http://www.gsea-msigdb.org/gsea/msigdb/cards/NABA_ECM_REGULATORS
Canonical_Pathways	KEGG_PRION_DISEASES	35	4	3.28121e-05	0.00313712	NCAM1:C9:C5:NOTCH1	http://www.gsea-msigdb.org/gsea/msigdb/cards/KEGG_PRION_DISEASES
Canonical_Pathways	BIOCARTA_GRANULOCYTES_PATHWAY	14	3	4.8735e-05	0.00446534	SELL:CSF3:C5	http://www.gsea-msigdb.org/gsea/msigdb/cards/BIOCARTA_GRANULOCYTES_PATHWAY
Canonical_Pathways	REACTOME_IMMUNOREGULATORY_INTERACTIONS_BETWEEN_A_LYMPHOID_AND_A_NON_LYMPHOID_CELL	127	6	5.52072e-05	0.00485603	VCAM1:SELL:CRTAM:B2M:ICAM5:SIGLEC1	http://www.gsea-msigdb.org/gsea/msigdb/cards/REACTOME_IMMUNOREGULATORY_INTERACTIONS_BETWEEN_A_LYMPHOID_AND_A_NON_LYMPHOID_CELL
Canonical_Pathways	KEGG_CELL_ADHESION_MOLECULES_CAMS	130	6	6.2888e-05	0.00531887	VCAM1:SELL:SELE:CD6:NCAM1:SIGLEC1	http://www.gsea-msigdb.org/gsea/msigdb/cards/KEGG_CELL_ADHESION_MOLECULES_CAMS
Canonical_Pathways	KEGG_BLADDER_CANCER	42	4	6.81975e-05	0.00555431	MMP1:MMP2:MMP9:VEGFA	http://www.gsea-msigdb.org/gsea/msigdb/cards/KEGG_BLADDER_CANCER
Canonical_Pathways	PID_CXCR3_PATHWAY	43	4	7.48909e-05	0.00588161	CCL11:CXCL9:CXCL10:CXCL11	http://www.gsea-msigdb.org/gsea/msigdb/cards/PID_CXCR3_PATHWAY
Canonical_Pathways	REACTOME_HEMOSTASIS	612	12	8.54011e-05	0.00647576	MPL:CD48:SELL:SELE:MMP1:F7:GP1BA:LGALS3BP:SERPIND1:VEGFA:HGF:RARRES2	http://www.gsea-msigdb.org/gsea/msigdb/cards/REACTOME_HEMOSTASIS
Canonical_Pathways	REACTOME_TNFR2_NON_CANONICAL_NF_KB_PATHWAY	99	5	0.000173116	0.0126894	TNFRSF1B:TNFRSF17:LTA:LTB:EDA	http://www.gsea-msigdb.org/gsea/msigdb/cards/REACTOME_TNFR2_NON_CANONICAL_NF_KB_PATHWAY
Canonical_Pathways	REACTOME_INITIAL_TRIGGERING_OF_COMPLEMENT	22	3	0.000199998	0.014187	CRP:C4A:C4B	http://www.gsea-msigdb.org/gsea/msigdb/cards/REACTOME_INITIAL_TRIGGERING_OF_COMPLEMENT
Canonical_Pathways	REACTOME_MET_RECEPTOR_ACTIVATION	6	2	0.000402204	0.0268014	HGFAC:HGF	http://www.gsea-msigdb.org/gsea/msigdb/cards/REACTOME_MET_RECEPTOR_ACTIVATION
Canonical_Pathways	REACTOME_METAL_SEQUESTRATION_BY_ANTIMICROBIAL_PROTEINS	6	2	0.000402204	0.0268014	S100A9:LTF	http://www.gsea-msigdb.org/gsea/msigdb/cards/REACTOME_METAL_SEQUESTRATION_BY_ANTIMICROBIAL_PROTEINS
Canonical_Pathways	REACTOME_PEPTIDE_LIGAND_BINDING_RECEPTORS	188	6	0.000467566	0.0302405	CCL25:CXCL9:CXCL10:CXCL11:CCL21:C5	http://www.gsea-msigdb.org/gsea/msigdb/cards/REACTOME_PEPTIDE_LIGAND_BINDING_RECEPTORS
Canonical_Pathways	NABA_CORE_MATRISOME	270	7	0.000548981	0.0342775	SPOCK2:IGFBP4:ADIPOQ:ESM1:THBS2:IGFBP1:OMD	http://www.gsea-msigdb.org/gsea/msigdb/cards/NABA_CORE_MATRISOME
Canonical_Pathways	BIOCARTA_NEUTROPHIL_PATHWAY	7	2	0.00056116	0.0342775	SELL:SELE	http://www.gsea-msigdb.org/gsea/msigdb/cards/BIOCARTA_NEUTROPHIL_PATHWAY
Canonical_Pathways	REACTOME_ACTIVATION_OF_MATRIX_METALLOPROTEINASES	32	3	0.000620124	0.0365321	MMP1:MMP2:MMP9	http://www.gsea-msigdb.org/gsea/msigdb/cards/REACTOME_ACTIVATION_OF_MATRIX_METALLOPROTEINASES
Canonical_Pathways	KEGG_SYSTEMIC_LUPUS_ERYTHEMATOSUS	131	5	0.000631297	0.0365321	FCGR3B:C9:C4A:C4B:C5	http://www.gsea-msigdb.org/gsea/msigdb/cards/KEGG_SYSTEMIC_LUPUS_ERYTHEMATOSUS
Canonical_Pathways	REACTOME_TERMINAL_PATHWAY_OF_COMPLEMENT	8	2	0.000745656	0.0399926	C9:C5	http://www.gsea-msigdb.org/gsea/msigdb/cards/REACTOME_TERMINAL_PATHWAY_OF_COMPLEMENT
Canonical_Pathways	BIOCARTA_LYMPHOCYTE_PATHWAY	8	2	0.000745656	0.0399926	SELL:SELE	http://www.gsea-msigdb.org/gsea/msigdb/cards/BIOCARTA_LYMPHOCYTE_PATHWAY
Canonical_Pathways	BIOCARTA_VOBESITY_PATHWAY	8	2	0.000745656	0.0399926	RETN:ADIPOQ	http://www.gsea-msigdb.org/gsea/msigdb/cards/BIOCARTA_VOBESITY_PATHWAY
Canonical_Pathways	REACTOME_SIGNALING_BY_RECEPTOR_TYROSINE_KINASES	468	9	0.000787076	0.0412091	NTRK3:INSR:TGFA:MMP9:MST1:HGFAC:VEGFA:THBS2:HGF	http://www.gsea-msigdb.org/gsea/msigdb/cards/REACTOME_SIGNALING_BY_RECEPTOR_TYROSINE_KINASES
Canonical_Pathways	NABA_PROTEOGLYCANS	35	3	0.000809023	0.041373	SPOCK2:ESM1:OMD	http://www.gsea-msigdb.org/gsea/msigdb/cards/NABA_PROTEOGLYCANS
Canonical_Pathways	REACTOME_EXTRACELLULAR_MATRIX_ORGANIZATION	296	7	0.000942288	0.0437704	VCAM1:MMP1:NCAM1:MMP2:ICAM5:MMP9:BMP1	http://www.gsea-msigdb.org/gsea/msigdb/cards/REACTOME_EXTRACELLULAR_MATRIX_ORGANIZATION
Canonical_Pathways	PID_IL23_PATHWAY	37	3	0.000953184	0.0437704	IL19:MPO:CXCL9	http://www.gsea-msigdb.org/gsea/msigdb/cards/PID_IL23_PATHWAY
Canonical_Pathways	PID_FRA_PATHWAY	37	3	0.000953184	0.0437704	MMP1:MMP2:MMP9	http://www.gsea-msigdb.org/gsea/msigdb/cards/PID_FRA_PATHWAY
Canonical_Pathways	BIOCARTA_RECK_PATHWAY	9	2	0.000955426	0.0437704	MMP2:MMP9	http://www.gsea-msigdb.org/gsea/msigdb/cards/BIOCARTA_RECK_PATHWAY
Canonical_Pathways	BIOCARTA_ALTERNATIVE_PATHWAY	9	2	0.000955426	0.0437704	C9:C5	http://www.gsea-msigdb.org/gsea/msigdb/cards/BIOCARTA_ALTERNATIVE_PATHWAY
Canonical_Pathways	REACTOME_FORMATION_OF_FIBRIN_CLOT_CLOTTING_CASCADE	38	3	0.00103097	0.0456764	F7:GP1BA:SERPIND1	http://www.gsea-msigdb.org/gsea/msigdb/cards/REACTOME_FORMATION_OF_FIBRIN_CLOT_CLOTTING_CASCADE
Canonical_Pathways	KEGG_HEMATOPOIETIC_CELL_LINEAGE	85	4	0.00103857	0.0456764	GP1BA:CSF3:FCER2:MME	http://www.gsea-msigdb.org/gsea/msigdb/cards/KEGG_HEMATOPOIETIC_CELL_LINEAGE
Canonical_Pathways	KEGG_SPHINGOLIPID_METABOLISM	39	3	0.00111266	0.0479751	ASAH2:SMPD1:ENPP7	http://www.gsea-msigdb.org/gsea/msigdb/cards/KEGG_SPHINGOLIPID_METABOLISM

## Sheet: 1I
1I. The results from the basic Cox mixed effects proportional hazards models showing 1306 EpiScore-trait relationships tested in Generation Scotland (maximum n=9,537) and the 294 associations (emboldened) which were significant with FDR P < 0.05. Two associations failed the Schoenfeld assumption and were therefore excluded. The hazard ratio, lower and upper confidence intervals (LC and UC), P-val…
Identifier	Name	Panel	Outcome	Hazard Ratio	Lower CI	Upper CI	P Value	Cases (n)	Controls (n)	FDR P Value
GDF.8	GDF.8	Olink Neurology	COPD	0.46	0.42	0.52	0	346	8939	0
NTRK3	NTRK3	Olink Neurology	COPD	0.5	0.45	0.56	0	346	8939	0
SKR3	SKR3	Olink Neurology	COPD	2.57	2.29	2.88	0	346	8939	0
CCL11	CCL11	Olink Inflammatory	COPD	1.87	1.68	2.09	0	346	8939	0
EN.RAGE	EN.RAGE	Olink Inflammatory	COPD	1.63	1.46	1.82	0	346	8939	0
FGF.21	FGF.21	Olink Inflammatory	COPD	1.98	1.76	2.23	0	346	8939	0
HGF	HGF	Olink Inflammatory	COPD	2.54	2.26	2.85	0	346	8939	0
OSM	OSM	Olink Inflammatory	COPD	1.79	1.6	1.99	0	346	8939	0
TGF.alpha	TGF.alpha	Olink Inflammatory	COPD	2.42	2.17	2.7	0	346	8939	0
VEGFA	VEGFA	Olink Inflammatory	COPD	2.43	2.17	2.73	0	346	8939	0
2579-17	MMP9	SomaScan	COPD	2.52	2.25	2.82	0	346	8939	0
2658-27	NTRK3	SomaScan	COPD	0.36	0.32	0.4	0	346	8939	0
2950-57	IGFBP4	SomaScan	COPD	2.07	1.84	2.33	0	346	8939	0
3079-62	RARRES2	SomaScan	COPD	1.98	1.74	2.24	0	346	8939	0
3216-2	PIGR	SomaScan	COPD	3.2	2.85	3.6	0	346	8939	0
3235-50	WFIKKN2	SomaScan	COPD	0.43	0.38	0.48	0	346	8939	0
3298-52	CNTN4	SomaScan	COPD	0.53	0.47	0.59	0	346	8939	0
3316-58	SERPIND1	SomaScan	COPD	2.89	2.57	3.24	0	346	8939	0
3324-51	LY9	SomaScan	COPD	0.6	0.54	0.68	0	346	8939	0
3508-78	CCL22	SomaScan	COPD	1.82	1.63	2.03	0	346	8939	0
3519-3	CCL17	SomaScan	COPD	2.2	1.97	2.45	0	346	8939	0
4337-49	CRP	SomaScan	COPD	2.38	2.11	2.69	0	346	8939	0
4496-60	MMP12	SomaScan	COPD	4.13	3.55	4.79	0	346	8939	0
4498-62	NCAM1	SomaScan	COPD	0.42	0.38	0.47	0	346	8939	0
4568-17	SLITRK5	SomaScan	COPD	0.33	0.29	0.37	0	346	8939	0
4831-4	SELL	SomaScan	COPD	0.53	0.46	0.6	0	346	8939	0
4924-32	MMP1	SomaScan	COPD	1.86	1.66	2.08	0	346	8939	0
5107-7	NOTCH1	SomaScan	COPD	0.59	0.52	0.66	0	346	8939	0
5124-69	ICAM5	SomaScan	COPD	2.09	1.86	2.34	0	346	8939	0
5358-3	OMD	SomaScan	COPD	0.55	0.49	0.62	0	346	8939	0
5363-51	SEMA3E	SomaScan	COPD	0.37	0.33	0.41	0	346	8939	0
FGF.21	FGF.21	Olink Inflammatory	Diabetes	1.58	1.42	1.75	0	428	8756	0
2771-35	IGFBP1	SomaScan	Diabetes	0.54	0.48	0.61	0	428	8756	0
2851-63	C5	SomaScan	Diabetes	1.63	1.45	1.82	0	428	8756	0
3343-1	ACY1	SomaScan	Diabetes	1.93	1.71	2.19	0	428	8756	0
3470-1	SELE	SomaScan	Diabetes	1.85	1.63	2.1	0	428	8756	0
3554-24	ADIPOQ	SomaScan	Diabetes	0.41	0.34	0.48	0	428	8756	0
4498-62	NCAM1	SomaScan	Diabetes	0.64	0.57	0.7	0	428	8756	0
4929-55	SHBG	SomaScan	Diabetes	0.37	0.32	0.43	0	428	8756	0
4930-21	STC1	SomaScan	Diabetes	2.65	2.18	3.23	0	428	8756	0
5000-52	LGALS3BP	SomaScan	Diabetes	1.7	1.53	1.89	0	428	8756	0
2948-58	GHR	SomaScan	Diabetes	1.52	1.38	1.68	1.1e-16	428	8756	3.4519e-15
3175-51	ADAMTS13	SomaScan	COPD	0.62	0.55	0.69	2.2e-16	346	8939	6.74326e-15
G.CSF	G.CSF	Olink Neurology	COPD	1.57	1.41	1.75	6.7e-16	346	8939	2.00695e-14
2687-2	MIA	SomaScan	COPD	0.65	0.59	0.73	5.9e-15	346	8939	1.69048e-13
4568-17	SLITRK5	SomaScan	Diabetes	0.65	0.58	0.73	4.3e-14	428	8756	1.20583e-12
NEP	NEP	Olink Neurology	Diabetes	1.46	1.32	1.62	4.1e-13	428	8756	1.12579e-11
4831-4	SELL	SomaScan	Diabetes	0.63	0.56	0.71	4.4e-13	428	8756	1.18351e-11
5034-79	PRSS2	SomaScan	Diabetes	1.49	1.33	1.66	7e-13	428	8756	1.8452e-11
2705-5	CCL25	SomaScan	Diabetes	1.45	1.31	1.6	7.5e-13	428	8756	1.93824e-11
5107-7	NOTCH1	SomaScan	Diabetes	0.68	0.61	0.76	5.3e-12	428	8756	1.34335e-10
2658-27	NTRK3	SomaScan	IHD	0.69	0.62	0.76	5.5e-12	395	8646	1.36774e-10
4337-49	CRP	SomaScan	Diabetes	1.45	1.3	1.61	6.5e-12	428	8756	1.58648e-10
5029-3	FAP	SomaScan	COPD	0.69	0.62	0.77	8.4e-12	346	8939	2.01295e-10
3505-6	LTA|LTB	SomaScan	COPD	0.59	0.51	0.69	3.8e-11	346	8939	8.94357e-10
3044-3	CCL18	SomaScan	COPD	1.68	1.44	1.95	4.1e-11	346	8939	9.48035e-10
2658-27	NTRK3	SomaScan	Diabetes	0.71	0.64	0.79	8.3e-11	428	8756	1.8861e-09
5358-3	OMD	SomaScan	Diabetes	0.7	0.62	0.78	1e-10	428	8756	2.2339e-09
2579-17	MMP9	SomaScan	Lung.Cancer	1.58	1.37	1.82	1.3e-10	201	9265	2.85567e-09
4763-31	AFM	SomaScan	Diabetes	1.38	1.25	1.53	1.8e-10	428	8756	3.88918e-09
3348-49	BMP1	SomaScan	Diabetes	1.55	1.35	1.77	2e-10	428	8756	4.25161e-09
3339-33	THBS2	SomaScan	Diabetes	1.42	1.27	1.59	3.3e-10	428	8756	6.90381e-09
VEGFA	VEGFA	Olink Inflammatory	Diabetes	1.38	1.25	1.53	4.7e-10	428	8756	9.67906e-09
3216-2	PIGR	SomaScan	Pain	1.18	1.12	1.25	7.5e-10	1494	5341	1.52077e-08
3235-50	WFIKKN2	SomaScan	Diabetes	0.71	0.64	0.79	7.7e-10	428	8756	1.53767e-08
3044-3	CCL18	SomaScan	Diabetes	1.55	1.35	1.79	1.5e-09	428	8756	2.95075e-08
4160-49	MMP2	SomaScan	COPD	0.69	0.61	0.78	3.9e-09	346	8939	7.55912e-08
MMP.1	MMP.1	Olink Inflammatory	COPD	1.66	1.4	1.97	4.1e-09	346	8939	7.83159e-08
3216-2	PIGR	SomaScan	Lung.Cancer	1.52	1.32	1.75	5.4e-09	201	9265	1.01674e-07
3298-52	CNTN4	SomaScan	Diabetes	0.74	0.66	0.82	5.9e-09	428	8756	1.09524e-07
4568-17	SLITRK5	SomaScan	Lung.Cancer	0.64	0.55	0.74	7e-09	201	9265	1.28139e-07
4498-62	NCAM1	SomaScan	Pain	0.85	0.81	0.9	9.6e-09	1494	5341	1.73326e-07
4498-62	NCAM1	SomaScan	IHD	0.74	0.66	0.82	1e-08	395	8646	1.78108e-07
HGF	HGF	Olink Inflammatory	IHD	1.37	1.23	1.52	1.1e-08	395	8646	1.93307e-07
4337-49	CRP	SomaScan	IHD	1.39	1.24	1.56	1.2e-08	395	8646	2.08105e-07
3316-58	SERPIND1	SomaScan	Pain	1.17	1.11	1.24	2.5e-08	1494	5341	4.27922e-07
5363-51	SEMA3E	SomaScan	Pain	0.86	0.82	0.91	5.8e-08	1494	5341	9.80051e-07
2658-27	NTRK3	SomaScan	Pain	0.86	0.82	0.91	6.4e-08	1494	5341	1.06775e-06
3216-2	PIGR	SomaScan	IHD	1.32	1.19	1.47	1e-07	395	8646	1.6475e-06
2516-57	CCL21	SomaScan	Diabetes	1.37	1.22	1.54	1.1e-07	428	8756	1.76805e-06
2950-57	IGFBP4	SomaScan	IHD	1.35	1.21	1.51	1.1e-07	395	8646	1.76805e-06
SKR3	SKR3	Olink Neurology	Diabetes	1.31	1.18	1.44	1.2e-07	428	8756	1.88286e-06
2658-27	NTRK3	SomaScan	Lung.Cancer	0.68	0.59	0.78	1.2e-07	201	9265	1.88286e-06
3079-62	RARRES2	SomaScan	Diabetes	1.36	1.21	1.52	1.3e-07	428	8756	1.99233e-06
TGF.alpha	TGF.alpha	Olink Inflammatory	IHD	1.32	1.19	1.47	1.3e-07	395	8646	1.99233e-06
4496-60	MMP12	SomaScan	Pain	1.26	1.15	1.37	1.4e-07	1494	5341	2.09682e-06
3324-51	LY9	SomaScan	Lung.Cancer	0.67	0.58	0.78	1.4e-07	201	9265	2.09682e-06
HGF	HGF	Olink Inflammatory	Diabetes	1.31	1.19	1.45	1.5e-07	428	8756	2.19667e-06
OSM	OSM	Olink Inflammatory	Lung.Cancer	1.46	1.27	1.68	1.5e-07	201	9265	2.19667e-06
4160-49	MMP2	SomaScan	Diabetes	0.74	0.66	0.83	1.8e-07	428	8756	2.60703e-06
FGF.21	FGF.21	Olink Inflammatory	Pain	1.16	1.1	1.23	2.2e-07	1494	5341	3.15174e-06
4496-60	MMP12	SomaScan	IHD	1.49	1.28	1.74	2.3e-07	395	8646	3.25957e-06
3339-33	THBS2	SomaScan	COPD	1.37	1.21	1.54	2.5e-07	346	8939	3.50532e-06
4496-60	MMP12	SomaScan	Lung.Cancer	1.69	1.38	2.07	3.3e-07	201	9265	4.57832e-06
5034-79	PRSS2	SomaScan	COPD	1.35	1.2	1.51	3.9e-07	346	8939	5.35437e-06
HGF	HGF	Olink Inflammatory	Lung.Cancer	1.46	1.26	1.69	4.6e-07	201	9265	6.25031e-06
3448-13	INSR	SomaScan	COPD	0.76	0.68	0.85	6e-07	346	8939	8.06939e-06
3316-58	SERPIND1	SomaScan	Lung.Cancer	1.46	1.26	1.7	6.9e-07	201	9265	9.18606e-06
4568-17	SLITRK5	SomaScan	Stroke	0.73	0.64	0.82	7.4e-07	317	9023	9.7532e-06
3235-50	WFIKKN2	SomaScan	IHD	0.75	0.67	0.84	8.4e-07	395	8646	1.09616e-05
5339-49	S100A9	SomaScan	COPD	1.32	1.18	1.47	9.3e-07	346	8939	1.20171e-05
3316-58	SERPIND1	SomaScan	Diabetes	1.28	1.16	1.42	9.7e-07	428	8756	1.24122e-05
VEGFA	VEGFA	Olink Inflammatory	Pain	1.15	1.08	1.21	1e-06	1494	5341	1.26731e-05
2950-57	IGFBP4	SomaScan	Pain	1.16	1.09	1.23	1.1e-06	1494	5341	1.38076e-05
3041-55	MRC2	SomaScan	COPD	0.77	0.69	0.85	1.3e-06	346	8939	1.60131e-05
3473-78	MPL	SomaScan	Diabetes	0.79	0.72	0.87	1.3e-06	428	8756	1.60131e-05
4831-4	SELL	SomaScan	IHD	0.73	0.64	0.83	1.5e-06	395	8646	1.83056e-05
NTRK3	NTRK3	Olink Neurology	Pain	0.87	0.82	0.92	1.6e-06	1494	5341	1.93468e-05
4920-10	LYZ	SomaScan	COPD	1.31	1.17	1.47	1.9e-06	346	8939	2.25604e-05
NTRK3	NTRK3	Olink Neurology	Diabetes	0.78	0.71	0.86	1.9e-06	428	8756	2.25604e-05
2851-63	C5	SomaScan	COPD	1.34	1.19	1.51	2.2e-06	346	8939	2.58893e-05
4496-60	MMP12	SomaScan	Diabetes	1.43	1.23	1.66	2.4e-06	428	8756	2.77474e-05
3316-58	SERPIND1	SomaScan	IHD	1.29	1.16	1.43	2.4e-06	395	8646	2.77474e-05
VEGFA	VEGFA	Olink Inflammatory	IHD	1.29	1.16	1.43	2.8e-06	395	8646	3.20904e-05
3029-52	CD209	SomaScan	COPD	0.76	0.68	0.85	3.2e-06	346	8939	3.63586e-05
2658-27	NTRK3	SomaScan	RA	0.55	0.43	0.71	3.3e-06	65	9281	3.71744e-05
5363-51	SEMA3E	SomaScan	Lung.Cancer	0.72	0.62	0.82	3.6e-06	201	9265	4.02102e-05
NTRK3	NTRK3	Olink Neurology	IHD	0.78	0.71	0.87	4e-06	395	8646	4.43025e-05
5124-69	ICAM5	SomaScan	Pain	1.14	1.08	1.2	4.3e-06	1494	5341	4.72283e-05
FGF.21	FGF.21	Olink Inflammatory	Stroke	1.32	1.17	1.48	4.5e-06	317	9023	4.90165e-05
3235-50	WFIKKN2	SomaScan	Stroke	0.75	0.66	0.85	4.8e-06	317	9023	5.18557e-05
3339-33	THBS2	SomaScan	IHD	1.3	1.16	1.46	5.1e-06	395	8646	5.46488e-05
5000-52	LGALS3BP	SomaScan	COPD	1.3	1.16	1.46	6.5e-06	346	8939	6.90887e-05
4498-62	NCAM1	SomaScan	Stroke	0.77	0.69	0.86	7e-06	317	9023	7.3808e-05
TGF.alpha	TGF.alpha	Olink Inflammatory	Lung.Cancer	1.39	1.2	1.6	7.2e-06	201	9265	7.53143e-05
4990-87	GP1BA	SomaScan	COPD	0.78	0.71	0.87	7.3e-06	346	8939	7.57591e-05
SKR3	SKR3	Olink Neurology	Pain	1.13	1.07	1.19	8.3e-06	1494	5341	8.54641e-05
GDF.8	GDF.8	Olink Neurology	Pain	0.89	0.84	0.94	8.7e-06	1494	5341	8.88884e-05
G.CSF	G.CSF	Olink Neurology	Diabetes	1.25	1.13	1.38	9e-06	428	8756	9.12462e-05
2658-27	NTRK3	SomaScan	Stroke	0.77	0.69	0.87	1.1e-05	317	9023	0.000109833
3060-43	C9	SomaScan	Diabetes	0.79	0.71	0.88	1.1e-05	428	8756	0.000109833
SKR3	SKR3	Olink Neurology	Lung.Cancer	1.37	1.19	1.58	1.2e-05	201	9265	0.000118917
3216-2	PIGR	SomaScan	Stroke	1.28	1.15	1.44	1.6e-05	317	9023	0.000157373
2665-26	TNFRSF17	SomaScan	COPD	1.27	1.14	1.42	1.8e-05	346	8939	0.000175733
VEGFA	VEGFA	Olink Inflammatory	Lung.Cancer	1.38	1.19	1.59	1.9e-05	201	9265	0.000184132
4924-32	MMP1	SomaScan	Pain	1.12	1.07	1.19	2.1e-05	1494	5341	0.000200565
3298-52	CNTN4	SomaScan	IHD	0.79	0.71	0.88	2.1e-05	395	8646	0.000200565
CXCL9	CXCL9	Olink Inflammatory	COPD	1.28	1.14	1.43	2.3e-05	346	8939	0.000216529
4568-17	SLITRK5	SomaScan	IHD	0.77	0.69	0.87	2.3e-05	395	8646	0.000216529
4568-17	SLITRK5	SomaScan	Pain	0.88	0.83	0.93	2.7e-05	1494	5341	0.000252383
3216-2	PIGR	SomaScan	RA	1.69	1.32	2.17	3e-05	65	9281	0.000274583
5358-3	OMD	SomaScan	IHD	0.78	0.7	0.88	3e-05	395	8646	0.000274583
5363-51	SEMA3E	SomaScan	IHD	0.81	0.73	0.89	3e-05	395	8646	0.000274583
2826-53	EDA	SomaScan	COPD	0.8	0.72	0.89	3.6e-05	346	8939	0.000327228
CCL11	CCL11	Olink Inflammatory	Pain	1.11	1.06	1.17	4.6e-05	1494	5341	0.00041526
SIGLEC1	SIGLEC1	Olink Neurology	COPD	1.26	1.13	1.4	4.7e-05	346	8939	0.000421401
TGF.alpha	TGF.alpha	Olink Inflammatory	Diabetes	1.22	1.11	1.35	5.2e-05	428	8756	0.000463081
3473-78	MPL	SomaScan	COPD	0.8	0.72	0.89	5.5e-05	346	8939	0.00048651
N.CDase	N.CDase	Olink Neurology	COPD	0.8	0.72	0.89	5.7e-05	346	8939	0.00050084
4496-60	MMP12	SomaScan	RA	2.02	1.43	2.86	6e-05	65	9281	0.000523709
3291-30	FCER2	SomaScan	COPD	0.8	0.71	0.89	7.3e-05	346	8939	0.00062885
EN.RAGE	EN.RAGE	Olink Inflammatory	Lung.Cancer	1.33	1.15	1.53	7.3e-05	201	9265	0.00062885
3175-51	ADAMTS13	SomaScan	Diabetes	0.81	0.73	0.9	7.9e-05	428	8756	0.000676117
SMPD1	SMPD1	Olink Neurology	COPD	1.23	1.11	1.37	8.1e-05	346	8939	0.000688761
GZMA	GZMA	Olink Neurology	COPD	0.81	0.73	0.9	8.4e-05	346	8939	0.000709692
3029-52	CD209	SomaScan	Stroke	0.79	0.7	0.89	8.7e-05	317	9023	0.000730357
5107-7	NOTCH1	SomaScan	IHD	0.8	0.71	0.89	9.2e-05	395	8646	0.000767443
4498-62	NCAM1	SomaScan	RA	0.61	0.47	0.78	9.9e-05	65	9281	0.000820642
3805-16	ESM1	SomaScan	COPD	0.8	0.72	0.9	0.0001	346	8939	0.00082375
3470-1	SELE	SomaScan	Stroke	1.31	1.14	1.5	0.00011	317	9023	0.000889448
2579-17	MMP9	SomaScan	IHD	1.23	1.11	1.36	0.00011	395	8646	0.000889448
5000-52	LGALS3BP	SomaScan	IHD	1.23	1.11	1.37	0.00011	395	8646	0.000889448
HGF	HGF	Olink Inflammatory	Pain	1.11	1.05	1.17	0.00013	1494	5341	0.00103842
3079-62	RARRES2	SomaScan	IHD	1.26	1.12	1.41	0.00013	395	8646	0.00103842
3805-16	ESM1	SomaScan	Diabetes	0.82	0.74	0.91	0.00014	428	8756	0.00109833
2851-63	C5	SomaScan	IHD	1.25	1.11	1.4	0.00014	395	8646	0.00109833
3470-1	SELE	SomaScan	IHD	1.28	1.13	1.45	0.00014	395	8646	0.00109833
EZR	EZR	Olink Neurology	COPD	0.82	0.73	0.91	0.00015	346	8939	0.00115614
3519-3	CCL17	SomaScan	RA	1.59	1.25	2.03	0.00015	65	9281	0.00115614
3175-51	ADAMTS13	SomaScan	IHD	0.81	0.73	0.9	0.00015	395	8646	0.00115614
3519-3	CCL17	SomaScan	Lung.Cancer	1.31	1.14	1.5	0.00016	201	9265	0.00122605
2705-5	CCL25	SomaScan	COPD	1.23	1.1	1.37	0.00017	346	8939	0.00129514
3060-43	C9	SomaScan	COPD	1.24	1.11	1.39	0.00018	346	8939	0.00136345
3316-58	SERPIND1	SomaScan	Stroke	1.25	1.11	1.4	0.00019	317	9023	0.00142284
4496-60	MMP12	SomaScan	Stroke	1.38	1.17	1.64	0.00019	317	9023	0.00142284
3448-13	INSR	SomaScan	Diabetes	0.83	0.75	0.92	0.00021	428	8756	0.00155494
EN.RAGE	EN.RAGE	Olink Inflammatory	IHD	1.21	1.1	1.34	0.00021	395	8646	0.00155494
3216-2	PIGR	SomaScan	Diabetes	1.2	1.09	1.33	0.00025	428	8756	0.00184078
SKR3	SKR3	Olink Neurology	IHD	1.21	1.09	1.34	0.00026	395	8646	0.00190378
2780-35	LTF	SomaScan	COPD	1.22	1.1	1.36	0.00027	346	8939	0.00196608
SKR3	SKR3	Olink Neurology	Stroke	1.24	1.1	1.39	0.00028	317	9023	0.00202769
HGF	HGF	Olink Inflammatory	Stroke	1.24	1.1	1.4	0.00029	317	9023	0.00207728
3079-62	RARRES2	SomaScan	Pain	1.12	1.06	1.2	0.00029	1494	5341	0.00207728
2579-17	MMP9	SomaScan	RA	1.58	1.23	2.03	0.00031	65	9281	0.00220854
4337-49	CRP	SomaScan	Pain	1.11	1.05	1.17	0.00035	1494	5341	0.00248011
4924-32	MMP1	SomaScan	RA	1.57	1.23	2.02	0.00036	65	9281	0.00253733
2851-63	C5	SomaScan	Stroke	1.25	1.11	1.42	0.00039	317	9023	0.00271968
5358-3	OMD	SomaScan	Pain	0.9	0.85	0.95	0.00039	1494	5341	0.00271968
2687-2	MIA	SomaScan	Diabetes	0.84	0.76	0.92	0.00041	428	8756	0.00284411
3216-2	PIGR	SomaScan	Depression	1.43	1.17	1.74	0.00042	101	8306	0.00289822
CCL11	CCL11	Olink Inflammatory	Lung.Cancer	1.28	1.12	1.48	0.00049	201	9265	0.00336365
5124-69	ICAM5	SomaScan	Lung.Cancer	1.29	1.12	1.5	0.0005	201	9265	0.00341451
GZMA	GZMA	Olink Neurology	RA	0.66	0.52	0.83	0.00053	65	9281	0.00358226
3324-51	LY9	SomaScan	IHD	0.83	0.75	0.92	0.00053	395	8646	0.00358226
2579-17	MMP9	SomaScan	Pain	1.1	1.04	1.16	0.00056	1494	5341	0.00376571
SIGLEC1	SIGLEC1	Olink Neurology	Pain	1.1	1.04	1.16	0.00057	1494	5341	0.0038135
3508-78	CCL22	SomaScan	RA	1.52	1.2	1.94	0.0006	65	9281	0.00399394
4831-4	SELL	SomaScan	Pain	0.89	0.83	0.95	0.00061	1494	5341	0.0040401
NEP	NEP	Olink Neurology	COPD	1.21	1.09	1.36	0.00062	346	8939	0.00406547
CCL11	CCL11	Olink Inflammatory	Depression	1.4	1.16	1.7	0.00062	101	8306	0.00406547
FGF.21	FGF.21	Olink Inflammatory	IHD	1.2	1.08	1.34	0.00064	395	8646	0.00415527
5034-79	PRSS2	SomaScan	IHD	1.21	1.09	1.35	0.00064	395	8646	0.00415527
OSM	OSM	Olink Inflammatory	Diabetes	1.19	1.08	1.31	0.00066	428	8756	0.00426412
3324-51	LY9	SomaScan	RA	0.64	0.49	0.83	0.00076	65	9281	0.00488624
3235-50	WFIKKN2	SomaScan	Pain	0.91	0.86	0.96	0.0011	1494	5341	0.00700386
4930-21	STC1	SomaScan	IHD	1.38	1.14	1.67	0.0011	395	8646	0.00700386
4153-11	SERPINA3	SomaScan	Diabetes	0.85	0.77	0.94	0.0012	428	8756	0.00756746
3079-62	RARRES2	SomaScan	RA	1.59	1.2	2.11	0.0012	65	9281	0.00756746
G.CSF	G.CSF	Olink Neurology	Lung.Cancer	1.25	1.09	1.44	0.0013	201	9265	0.00815905
3343-1	ACY1	SomaScan	Stroke	1.25	1.09	1.44	0.0015	317	9023	0.00932547
3195-50	GNLY	SomaScan	RA	0.64	0.49	0.84	0.0015	65	9281	0.00932547
GDF.8	GDF.8	Olink Neurology	IHD	0.85	0.76	0.94	0.0016	395	8646	0.00990047
TGF.alpha	TGF.alpha	Olink Inflammatory	Pain	1.09	1.03	1.15	0.0017	1494	5341	0.0104701
3485-28	B2M	SomaScan	COPD	1.26	1.09	1.46	0.0018	346	8939	0.0109833
5000-52	LGALS3BP	SomaScan	Pain	1.09	1.03	1.16	0.0018	1494	5341	0.0109833
4924-32	MMP1	SomaScan	IHD	1.18	1.06	1.31	0.0019	395	8646	0.0115401
4930-21	STC1	SomaScan	COPD	1.39	1.13	1.72	0.002	346	8939	0.0119276
3152-57	TNFRSF1B	SomaScan	RA	1.57	1.18	2.1	0.002	65	9281	0.0119276
GDF.8	GDF.8	Olink Neurology	Lung.Cancer	0.8	0.69	0.92	0.002	201	9265	0.0119276
4337-49	CRP	SomaScan	Lung.Cancer	1.27	1.09	1.48	0.002	201	9265	0.0119276
3079-62	RARRES2	SomaScan	Lung.Cancer	1.28	1.09	1.5	0.0021	201	9265	0.0124676
5358-3	OMD	SomaScan	Depression	0.71	0.58	0.89	0.0022	101	8306	0.0129446
OSM	OSM	Olink Inflammatory	IHD	1.33	1.11	1.59	0.0022	395	8646	0.0129446
5491-12	SPOCK2	SomaScan	COPD	0.85	0.76	0.94	0.0024	346	8939	0.0139348
EN.RAGE	EN.RAGE	Olink Inflammatory	Diabetes	1.17	1.06	1.29	0.0024	428	8756	0.0139348
5363-51	SEMA3E	SomaScan	Diabetes	0.86	0.78	0.95	0.0024	428	8756	0.0139348
2950-57	IGFBP4	SomaScan	Stroke	1.21	1.07	1.36	0.0025	317	9023	0.0143886
2982-82	LGALS4	SomaScan	Diabetes	1.17	1.06	1.3	0.0025	428	8756	0.0143886
3470-1	SELE	SomaScan	COPD	1.23	1.07	1.41	0.0026	346	8939	0.0148346
4435-66	ENPP7	SomaScan	Diabetes	1.17	1.06	1.29	0.0026	428	8756	0.0148346
5107-7	NOTCH1	SomaScan	Pain	0.92	0.87	0.97	0.003	1494	5341	0.01697
2851-63	C5	SomaScan	RA	1.51	1.15	1.98	0.003	65	9281	0.01697
N.CDase	N.CDase	Olink Neurology	Diabetes	1.16	1.05	1.27	0.0031	428	8756	0.0174607
2516-57	CCL21	SomaScan	Stroke	1.21	1.07	1.38	0.0032	317	9023	0.0179472
3175-51	ADAMTS13	SomaScan	Pain	0.92	0.87	0.97	0.0033	1494	5341	0.0183519
5107-7	NOTCH1	SomaScan	RA	0.67	0.51	0.88	0.0033	65	9281	0.0183519
5358-3	OMD	SomaScan	Lung.Cancer	0.8	0.69	0.93	0.0034	201	9265	0.0187498
4500-50	CLEC11A	SomaScan	IBD	1.24	1.07	1.44	0.0034	203	9083	0.0187498
5124-69	ICAM5	SomaScan	Stroke	1.19	1.06	1.33	0.0035	317	9023	0.0191411
3235-50	WFIKKN2	SomaScan	Lung.Cancer	0.8	0.69	0.93	0.0035	201	9265	0.0191411
4337-49	CRP	SomaScan	RA	1.47	1.13	1.91	0.0037	65	9281	0.0201512
3298-52	CNTN4	SomaScan	Depression	0.74	0.6	0.91	0.0039	101	8306	0.0211531
4337-49	CRP	SomaScan	Stroke	1.2	1.06	1.35	0.004	317	9023	0.0215184
3339-33	THBS2	SomaScan	Pain	1.09	1.03	1.16	0.004	1494	5341	0.0215184
GDF.8	GDF.8	Olink Neurology	Stroke	0.85	0.76	0.95	0.0041	317	9023	0.0219667
3508-78	CCL22	SomaScan	Lung.Cancer	1.23	1.07	1.42	0.0042	201	9265	0.0224113
4435-66	ENPP7	SomaScan	IHD	1.17	1.05	1.3	0.0044	395	8646	0.0233839
3348-49	BMP1	SomaScan	Lung.Cancer	1.31	1.09	1.58	0.0046	201	9265	0.0243486
4568-17	SLITRK5	SomaScan	RA	0.68	0.51	0.89	0.0047	65	9281	0.0247784
4924-32	MMP1	SomaScan	Lung.Cancer	1.23	1.06	1.42	0.0048	201	9265	0.0252048
SKR3	SKR3	Olink Neurology	Depression	1.33	1.09	1.63	0.005	101	8306	0.0261508
2687-2	MIA	SomaScan	IHD	0.87	0.79	0.96	0.0052	395	8646	0.0270893
2771-35	IGFBP1	SomaScan	Depression	0.7	0.55	0.9	0.0054	101	8306	0.0279106
5358-3	OMD	SomaScan	Stroke	0.84	0.74	0.95	0.0054	317	9023	0.0279106
3508-78	CCL22	SomaScan	Pain	1.07	1.02	1.13	0.0057	1494	5341	0.0293461
3152-57	TNFRSF1B	SomaScan	COPD	1.2	1.05	1.37	0.0058	346	8939	0.0296295
3508-78	CCL22	SomaScan	Depression	1.31	1.08	1.59	0.0058	101	8306	0.0296295
3195-50	GNLY	SomaScan	Lung.Cancer	0.8	0.68	0.94	0.006	201	9265	0.0305328
2780-35	LTF	SomaScan	Stroke	1.16	1.04	1.3	0.0064	317	9023	0.0323188
HGF	HGF	Olink Inflammatory	RA	1.42	1.1	1.83	0.0064	65	9281	0.0323188
5124-69	ICAM5	SomaScan	Diabetes	1.15	1.04	1.27	0.0065	428	8756	0.0326985
4160-49	MMP2	SomaScan	Stroke	0.84	0.74	0.95	0.0066	317	9023	0.0330753
NTRK3	NTRK3	Olink Neurology	Depression	0.75	0.61	0.92	0.0067	101	8306	0.033323
2948-58	GHR	SomaScan	Pain	1.08	1.02	1.14	0.0067	1494	5341	0.033323
3044-3	CCL18	SomaScan	Stroke	1.25	1.06	1.47	0.0068	317	9023	0.0336932
4498-62	NCAM1	SomaScan	Lung.Cancer	0.82	0.71	0.95	0.0071	201	9265	0.0350479
3041-55	MRC2	SomaScan	Lung.Cancer	0.83	0.72	0.95	0.0074	201	9265	0.0362572
SMPD1	SMPD1	Olink Neurology	Alzheimer's Disease	1.39	1.09	1.77	0.0075	69	3764	0.036476
3175-51	ADAMTS13	SomaScan	Stroke	0.85	0.76	0.96	0.0075	317	9023	0.036476
5028-59	CD163	SomaScan	Diabetes	1.15	1.04	1.27	0.0076	428	8756	0.0368265
3292-75	CD48	SomaScan	RA	1.41	1.09	1.81	0.0077	65	9281	0.0370387
3044-3	CCL18	SomaScan	IHD	1.22	1.05	1.42	0.0077	395	8646	0.0370387
2826-53	EDA	SomaScan	Depression	1.3	1.07	1.58	0.0078	101	8306	0.0373833
2966-65	CLEC11A	SomaScan	IBD	1.22	1.05	1.41	0.0082	203	9083	0.039158
CD6	CD6	Olink Inflammatory	Diabetes	1.14	1.03	1.26	0.0083	428	8756	0.0394924
3508-78	CCL22	SomaScan	IHD	1.14	1.03	1.26	0.0085	395	8646	0.0402986
3485-28	B2M	SomaScan	RA	1.55	1.12	2.14	0.0086	65	9281	0.0406265
2687-2	MIA	SomaScan	Depression	0.77	0.63	0.93	0.0087	101	8306	0.0409521
4337-49	CRP	SomaScan	IBD	1.22	1.05	1.42	0.0089	203	9083	0.0417445
3175-51	ADAMTS13	SomaScan	Lung.Cancer	0.82	0.71	0.95	0.009	201	9265	0.0420638
2665-26	TNFRSF17	SomaScan	Pain	1.08	1.02	1.14	0.0091	1494	5341	0.0423809
GDF.8	GDF.8	Olink Neurology	RA	0.72	0.56	0.92	0.0093	65	9281	0.042858
3324-51	LY9	SomaScan	Bowel.Cancer	1.37	1.08	1.74	0.0093	77	9398	0.042858
4929-55	SHBG	SomaScan	IBD	0.76	0.61	0.93	0.0093	203	9083	0.042858
G.CSF	G.CSF	Olink Neurology	IHD	1.15	1.03	1.27	0.0095	395	8646	0.0436272
2687-2	MIA	SomaScan	RA	0.73	0.57	0.93	0.01	65	9281	0.0456055
2950-57	IGFBP4	SomaScan	Lung.Cancer	1.23	1.05	1.43	0.01	201	9265	0.0456055
TGF.alpha	TGF.alpha	Olink Inflammatory	Stroke	1.16	1.03	1.3	0.011	317	9023	0.0489797
4990-87	GP1BA	SomaScan	Diabetes	0.88	0.8	0.97	0.011	428	8756	0.0489797
3298-52	CNTN4	SomaScan	Pain	0.93	0.88	0.98	0.011	1494	5341	0.0489797
3519-3	CCL17	SomaScan	Pain	1.07	1.02	1.13	0.011	1494	5341	0.0489797
4141-79	CXCL10	SomaScan	RA	1.41	1.08	1.84	0.011	65	9281	0.0489797
5029-3	FAP	SomaScan	RA	0.73	0.58	0.93	0.011	65	9281	0.0489797
CCL11	CCL11	Olink Inflammatory	IHD	1.14	1.03	1.27	0.011	395	8646	0.0489797
2966-65	CLEC11A	SomaScan	COPD	1.15	1.03	1.29	0.012	346	8939	0.052198
4153-11	SERPINA3	SomaScan	COPD	1.15	1.03	1.28	0.012	346	8939	0.052198
3339-33	THBS2	SomaScan	Stroke	1.17	1.04	1.33	0.012	317	9023	0.052198
3044-3	CCL18	SomaScan	Pain	1.11	1.02	1.2	0.012	1494	5341	0.052198
3343-1	ACY1	SomaScan	Pain	1.09	1.02	1.17	0.012	1494	5341	0.052198
5034-79	PRSS2	SomaScan	Pain	1.08	1.02	1.14	0.012	1494	5341	0.052198
3805-16	ESM1	SomaScan	Lung.Cancer	0.83	0.72	0.96	0.012	201	9265	0.052198
NEP	NEP	Olink Neurology	Stroke	1.15	1.03	1.29	0.013	317	9023	0.0559935
CXCL9	CXCL9	Olink Inflammatory	Stroke	1.16	1.03	1.3	0.013	317	9023	0.0559935
3448-13	INSR	SomaScan	Lung.Cancer	0.83	0.72	0.96	0.013	201	9265	0.0559935
3600-2	CHIT1	SomaScan	COPD	1.23	1.04	1.45	0.014	346	8939	0.0599091
4924-32	MMP1	SomaScan	Depression	1.29	1.05	1.58	0.014	101	8306	0.0599091
4407-10	MST1	SomaScan	COPD	1.14	1.03	1.27	0.015	346	8939	0.0627619
3348-49	BMP1	SomaScan	Pain	1.1	1.02	1.18	0.015	1494	5341	0.0627619
5000-52	LGALS3BP	SomaScan	RA	1.38	1.07	1.79	0.015	65	9281	0.0627619
3554-24	ADIPOQ	SomaScan	IHD	0.82	0.7	0.96	0.015	395	8646	0.0627619
4153-11	SERPINA3	SomaScan	Lung.Cancer	1.19	1.03	1.37	0.015	201	9265	0.0627619
2665-26	TNFRSF17	SomaScan	Bowel.Cancer	1.33	1.06	1.68	0.015	77	9398	0.0627619
[truncated: 994 more rows]

[truncated: 19 more sheets: 1J, 1K, 1L, 1M, 1N, 1O, 1P, 1Q, 1R, 1S, 1T, 1U, 1V, 1W, 1X, 1Y, 1Z, 1A1, 1B1]
