# Supplementary figures and images for: Epigenetic scores for the circulating proteome as tools for disease prediction
Source: eLife journal article supplement (doi:10.7554/elife.71802), 2022-01-13

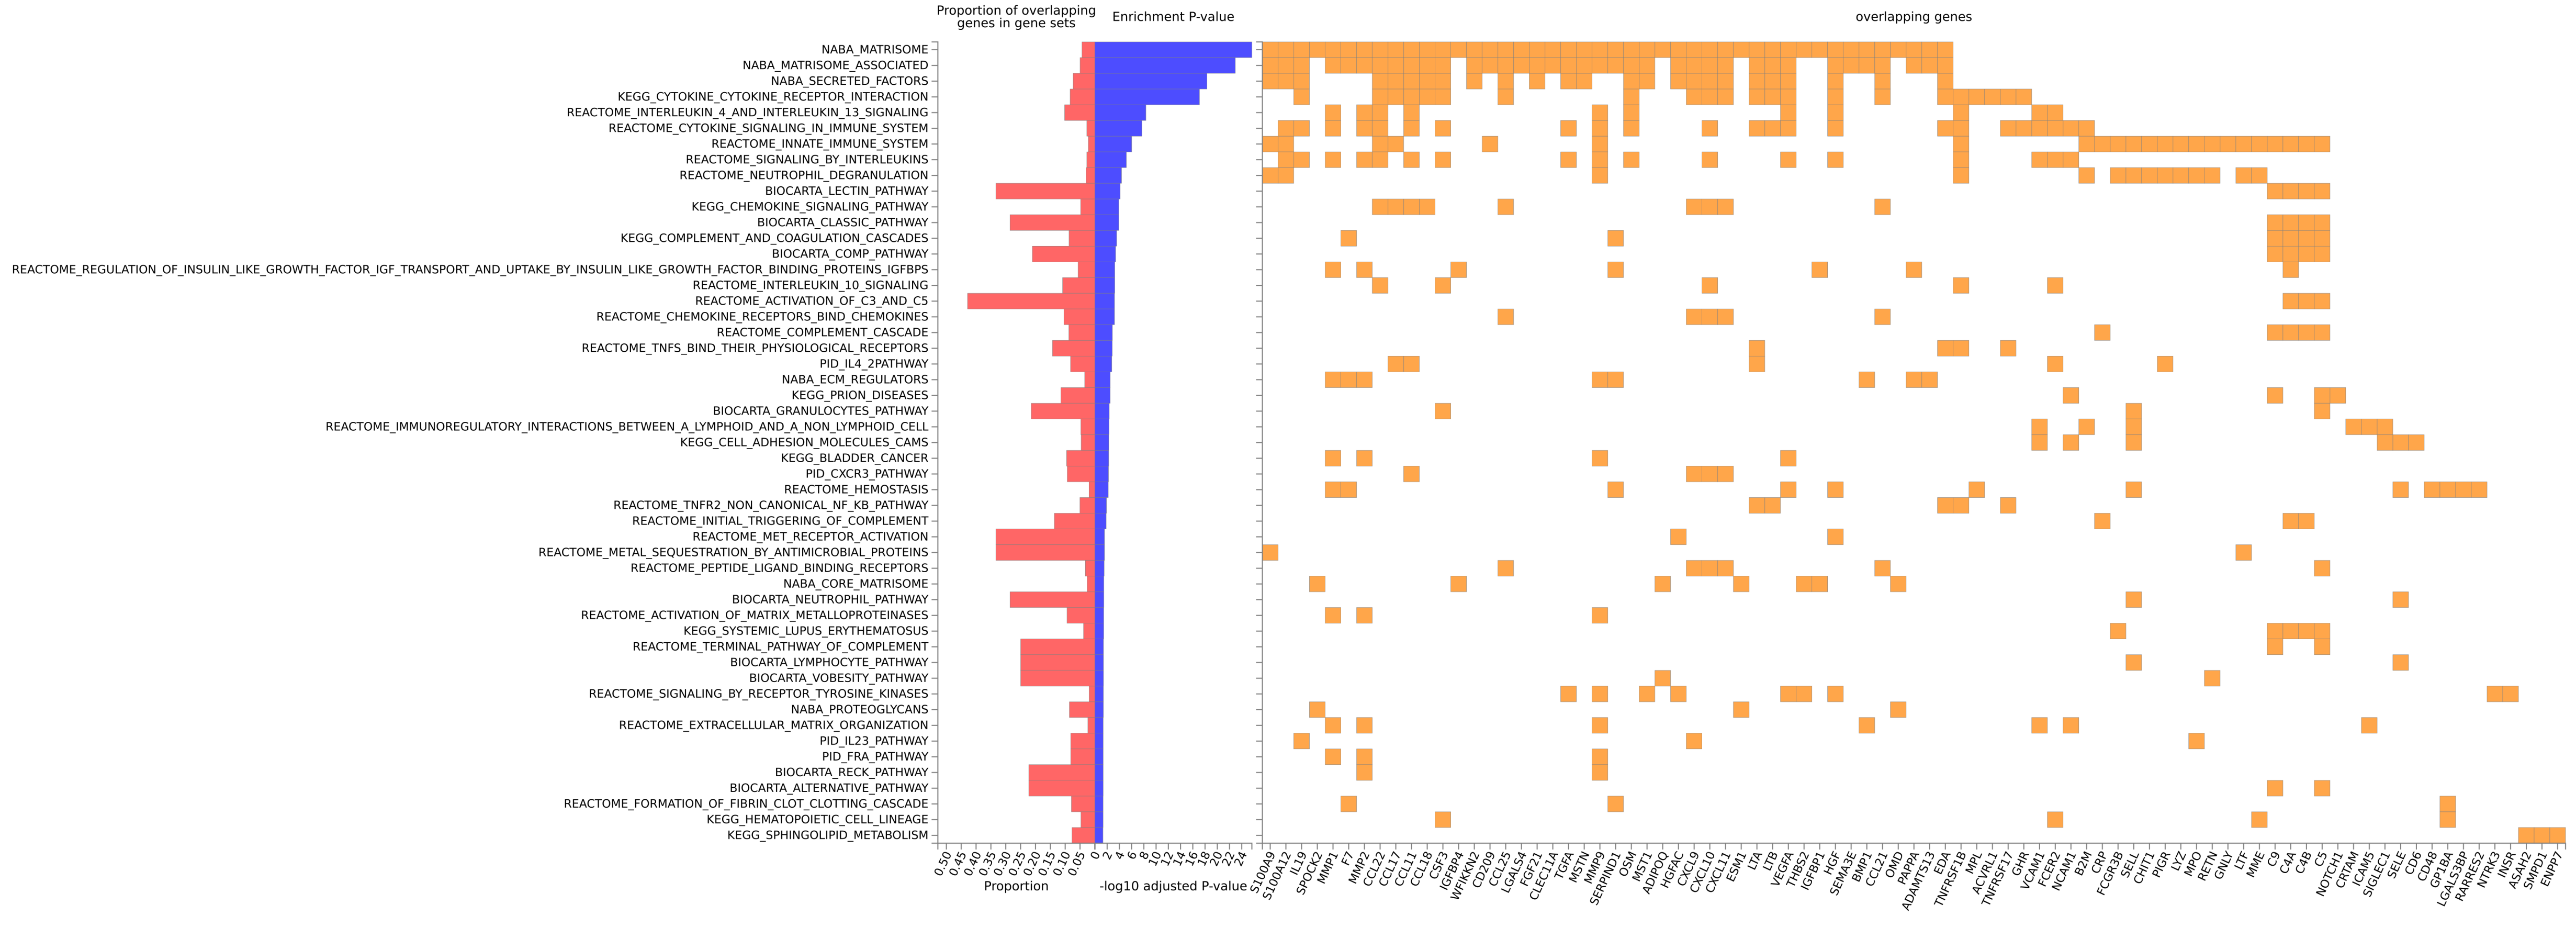

Supplement: supp [file elife-71802-supp-v1.zip]
